# Supplementary material for: Distinct transcriptomic changes in E14.5 mouse skeletal muscle lacking RYR1 or Cav1.1 converge at E18.5
Source: PLoS One. 2018 Mar 15;13(3):e0194428. doi: 10.1371/journal.pone.0194428 (PMC5854361; doi:10.1371/journal.pone.0194428)
Supplement: S1 Table — (XLSX) [file pone.0194428.s004.xlsx]

## Sheet: WT E18.5 vs E14.5
DEGs detected in WT E18.5 vs. E14.5
Transcript Cluster ID	Description	Gene Symbol	Fold Change (linear) (wt 18.5 vs. wt 14.5)	ANOVA p-value (wt 18.5 vs. wt 14.5)
17494246	hemoglobin Y, beta-like embryonic chain	Hbb-y	-13.18	1.3e-07
17439367	chemokine (C-X-C motif) ligand 13	Cxcl13	-8.81	2.3e-05
17470561	ribosomal modification protein rimK-like family member B	Rimklb	-6.69	9.01e-07
17545629	phosphate regulating endopeptidase homolog, X-linked	Phex	-4.87	4.04e-07
17301582	neurofilament, light polypeptide	Nefl	-4.8	0.000206
17247852	B cell CLL/lymphoma 11A (zinc finger protein)	Bcl11a	-4.77	9.16e-07
17355332	deleted in colorectal carcinoma	Dcc	-4.7	7.2e-05
17232215	monooxygenase, DBH-like 1	Moxd1	-4.33	4.21e-07
17423395	solute carrier family 26, member 7	Slc26a7	-4.3	3.96e-07
17398895	cellular retinoic acid binding protein II	Crabp2	-4.29	3.28e-07
17224977	delta/notch-like EGF repeat containing	Dner	-4.21	1.5e-05
17430645	Na+/K+ transporting ATPase interacting 1	Nkain1	-4.14	7.28e-07
17502789	glycophorin A	Gypa	-4.08	3e-06
17397377	protocadherin 10	Pcdh10	-3.94	3e-06
17484710	beta-1,4-N-acetyl-galactosaminyl transferase 4	B4galnt4	-3.88	2.25e-07
17505124	cadherin 3	Cdh3	-3.84	4e-07
17389608	Meis homeobox 2	Meis2	-3.83	1e-06
17416685	predicted gene, 23138 [Source:MGI Symbol;Acc:MGI:5452915]	Gm23138	-3.8	2.8e-05
17397990	membrane metallo endopeptidase	Mme	-3.77	7e-06
17286641	desmoplakin	Dsp	-3.75	8.3e-05
17428659	nuclear autoantigenic sperm protein (histone-binding)	Nasp	-3.69	1.93e-08
17496947	fibroblast growth factor receptor 2	Fgfr2	-3.67	1e-06
17544691	brain expressed X-linked 2	Bex2	-3.62	3e-06
17490038	predicted gene 5593	Gm5593	-3.55	2.27e-07
17397740	mab-21-like 1 (C. elegans)	Mab21l1	-3.54	2.36e-07
17437302	slit homolog 2 (Drosophila)	Slit2	-3.54	6.02e-07
17549906			-3.53	2.4e-05
17547813			-3.52	9.46e-08
17321966	keratin 5	Krt5	-3.51	8.4e-05
17331401	predicted gene, 22769 [Source:MGI Symbol;Acc:MGI:5452546]	Gm22769	-3.51	8e-06
17310530	cadherin 10	Cdh10	-3.49	1e-06
17411319	small nucleolar RNA, C/D box 45B; Rab geranylgeranyl transferase, b subunit	Snord45b	-3.44	6e-06
17277788	fibronectin leucine rich transmembrane protein 2	Flrt2	-3.43	1.09e-07
17392255	fibronectin leucine rich transmembrane protein 3	Flrt3	-3.39	5.69e-07
17426434	bone morphogenic protein/retinoic acid inducible neural specific 1	Brinp1	-3.36	3e-06
17365960	glial cell line derived neurotrophic factor family receptor alpha 1	Gfra1	-3.34	1.05e-08
17326756	neural cell adhesion molecule 2	Ncam2	-3.33	1e-06
17231844	PERP, TP53 apoptosis effector	Perp	-3.31	3.6e-05
17537271	zinc finger protein 711	Zfp711	-3.28	6.24e-07
17535245	AF4/FMR2 family, member 2	Aff2	-3.27	2e-06
17349549	microRNA 1949	Mir1949	-3.25	8.74e-09
17268255	insulin-like growth factor 2 mRNA binding protein 1; microRNA 3063	Igf2bp1	-3.23	8.05e-08
17406456	mab-21-like 2 (C. elegans)	Mab21l2	-3.22	3e-05
17402698	dickkopf homolog 2 (Xenopus laevis)	Dkk2	-3.21	2.98e-07
17330918	activated leukocyte cell adhesion molecule	Alcam	-3.17	6.45e-08
17518314	predicted gene, 22571 [Source:MGI Symbol;Acc:MGI:5452348]	Gm22571	-3.15	6.2e-05
17319887	signal peptide, CUB domain, EGF-like 1	Scube1	-3.14	6e-06
17304514	small nucleolar RNA, C/D box 19	Snord19	-3.12	6.44e-07
17518318	predicted gene, 22455 [Source:MGI Symbol;Acc:MGI:5452232]	Gm22455	-3.12	1.1e-05
17494221	hemoglobin, beta adult t chain; hemoglobin, beta adult minor chain	Hbb-bt	-3.1	0.000928
17544164	ribosomal protein S6 kinase polypeptide 6	Rps6ka6	-3.1	5.49e-08
17340397	predicted gene 6741 [Source:MGI Symbol;Acc:MGI:3643504]	Gm6741	-3.09	8.3e-05
17234030	transmembrane protein 26	Tmem26	-3.07	1e-06
17464706	distal-less homeobox 5	Dlx5	-3.07	1e-05
17355565	solute carrier family 14 (urea transporter), member 1	Slc14a1	-3.04	5.47e-07
17437350	predicted gene 20475 [Source:MGI Symbol;Acc:MGI:5141940]	Gm20475	-3.04	8e-06
17504019	adaptor-related protein complex 3, sigma 1 subunit, pseudogene 2 [Source:MGI Symbol;Acc:MGI:1929217]	Ap3s1-ps2	-3.03	0.000106
17515950	cell adhesion molecule-related/down-regulated by oncogenes	Cdon	-3.01	5e-06
17507288	Shc SH2-domain binding protein 1	Shcbp1	-3	1.44e-07
17425525	ferric-chelate reductase 1 like	Frrs1l	-2.99	2e-06
17406165	glycine receptor, beta subunit	Glrb	-2.98	2.84e-07
17328610	RIKEN cDNA 2610318N02 gene	2610318N02Rik	-2.97	2e-06
17529307	elongation of very long chain fatty acids (FEN1/Elo2, SUR4/Elo3, yeast)-like 4	Elovl4	-2.97	1e-06
17401563	solute carrier family 16 (monocarboxylic acid transporters), member 4	Slc16a4	-2.96	4e-06
17537865	adipocyte-related X-chromosome expressed sequence 1	Arxes1	-2.96	1.9e-05
17326964	hormonally upregulated Neu-associated kinase	Hunk	-2.94	1e-06
17364597	tolloid-like 2	Tll2	-2.94	1.64e-08
17324402	predicted gene, 24616 [Source:MGI Symbol;Acc:MGI:5454393]	Gm24616	-2.93	0.000348
17459207	neuron-derived neurotrophic factor	Ndnf	-2.92	2.1e-05
17532755	diacylglycerol kinase kappa	Dgkk	-2.92	3.49e-08
17434742	sema domain, immunoglobulin domain (Ig), short basic domain, secreted, (semaphorin) 3D	Sema3d	-2.91	3e-06
17548979	predicted gene 4322 [Source:MGI Symbol;Acc:MGI:3782503]	Gm4322	-2.9	3.42e-08
17437043	cytokine-like 1	Cytl1	-2.89	6.34e-07
17525503	checkpoint kinase 1	Chek1	-2.89	2.29e-07
17289584	centromere protein K	Cenpk	-2.88	1e-06
17346637	ephrin A5	Efna5	-2.88	9.86e-07
17511377	neuropilin (NRP) and tolloid (TLL)-like 2	Neto2	-2.87	5e-06
17388284	midkine	Mdk	-2.86	1.06e-08
17512153	cadherin 11	Cdh11	-2.86	1.75e-07
17288035	predicted gene 3325	Gm3325	-2.85	1.6e-07
17359212	helicase, lymphoid specific	Hells	-2.85	9.63e-08
17330443	growth associated protein 43	Gap43	-2.84	1.5e-05
17333686	limb expression 1 homolog (chicken)	Lix1	-2.84	5e-06
17351137	interleukin 17B	Il17b	-2.83	0.000356
17394160	matrilin 4	Matn4	-2.82	0.000117
17478476	growth arrest specific 2	Gas2	-2.82	5.48e-07
17532645	mitochondrially encoded tRNA tyrosine [Source:MGI Symbol;Acc:MGI:102470]	mt-Ty	-2.82	0.005521
17412296	Eph receptor A7	Epha7	-2.81	1e-06
17448595	gamma-aminobutyric acid (GABA) A receptor, subunit alpha 4	Gabra4	-2.81	2e-06
17331380	Eph receptor A3	Epha3	-2.8	1.35e-09
17419305	matrilin 1, cartilage matrix protein	Matn1	-2.8	0.008094
17283871	B cell leukemia/lymphoma 11B	Bcl11b	-2.79	0.00011
17530311	transmembrane protein 108	Tmem108	-2.79	5.74e-07
17532615	mitochondrially encoded tRNA lysine [Source:MGI Symbol;Acc:MGI:102483]	mt-Tk	-2.79	0.00387
17538405			-2.79	1.7e-05
17541343	SWI/SNF related, matrix associated, actin dependent regulator of chromatin, subfamily a, member 1; predicted gene, 38682	Smarca1	-2.79	2e-06
17528963	leucine rich repeat containing 1	Lrrc1	-2.77	2.22e-07
17529930	calsyntenin 2	Clstn2	-2.77	1.3e-05
17486449	zinc finger protein interacting with K protein 1	Zik1	-2.76	1.1e-05
17352913	desmocollin 3	Dsc3	-2.75	9.5e-05
17389467	gremlin 1	Grem1	-2.75	1e-06
17416687	predicted gene 12737 [Source:MGI Symbol;Acc:MGI:3651021]	Gm12737	-2.75	1.9e-05
17244973	TRH-degrading enzyme	Trhde	-2.74	0.000127
17219997	kinesin family member 26B	Kif26b	-2.73	4.75e-07
17445507	DBF4 homolog (S. cerevisiae)	Dbf4	-2.73	2.71e-08
17307738	frizzled homolog 3 (Drosophila)	Fzd3	-2.72	8e-06
17434764	sema domain, immunoglobulin domain (Ig), short basic domain, secreted, (semaphorin) 3A	Sema3a	-2.72	2e-06
17545199	leucine-rich repeats and calponin homology (CH) domain containing 2	Lrch2	-2.72	2e-06
17546055	EGF-like-domain, multiple 6	Egfl6	-2.72	2.61e-08
17352884	cadherin 2	Cdh2	-2.71	2e-06
17454310	glypican 2 (cerebroglycan)	Gpc2	-2.69	4.6e-05
17462492	alpha-2-macroglobulin	A2m	-2.69	8.7e-05
17502583	minichromosome maintenance deficient 5, cell division cycle 46 (S. cerevisiae)	Mcm5	-2.69	5.79e-08
17403185	unc-5 homolog C (C. elegans)	Unc5c	-2.68	6e-06
17409963	formin binding protein 1-like	Fnbp1l	-2.68	2e-06
17411262	ST6 (alpha-N-acetyl-neuraminyl-2,3-beta-galactosyl-1,3)-N-acetylgalactosaminide alpha-2,6-sialyltransferase 3	St6galnac3	-2.68	4.7e-07
17219848	exonuclease 1	Exo1	-2.67	8.79e-09
17281506	polymerase (DNA directed), epsilon 2 (p59 subunit)	Pole2	-2.67	3.59e-09
17289009	hyaluronan and proteoglycan link protein 1	Hapln1	-2.67	0.002107
17354906	piezo-type mechanosensitive ion channel component 2	Piezo2	-2.67	9.06e-08
17309385	dopachrome tautomerase	Dct	-2.65	0.000396
17529481	T-box18	Tbx18	-2.65	1.9e-07
17304512	predicted gene, 24916 [Source:MGI Symbol;Acc:MGI:5454693]	Gm24916	-2.64	0.000106
17550560			-2.64	0.005441
17316390	ribosomal protein L30	Rpl30	-2.62	4e-06
17364917	heparanase 2	Hpse2	-2.62	2e-06
17414651	zinc finger protein 618	Zfp618	-2.62	2e-06
17265470	RIKEN cDNA 6330403K07 gene	6330403K07Rik	-2.61	3e-06
17301247	PIN2/TERF1 interacting, telomerase inhibitor 1	Pinx1	-2.61	3.99e-07
17478406	NEL-like 1	Nell1	-2.61	2e-06
17241510	small nucleolar RNA, C/D box 98 [Source:MGI Symbol;Acc:MGI:3819569]	Snord98	-2.6	0.00025
17360863	RIKEN cDNA E330013P04 gene	E330013P04Rik	-2.6	3.18e-07
17316120	cadherin 6	Cdh6	-2.59	4e-05
17466532	protein disulfide isomerase associated 4; microRNA 704	Pdia4	-2.59	5.75e-08
17534673	serine/threonine kinase 26	Stk26	-2.59	4e-06
17239755	predicted gene, 23130 [Source:MGI Symbol;Acc:MGI:5452907]	Gm23130	-2.58	3e-06
17248255	hemoglobin X, alpha-like embryonic chain in Hba complex	Hba-x	-2.58	7e-05
17437353	microRNA 218-1	Mir218-1	-2.58	0.000264
17296080	predicted gene, 24431 [Source:MGI Symbol;Acc:MGI:5454208]	Gm24431	-2.57	5.1e-05
17352265	cerebellin 2 precursor protein	Cbln2	-2.57	2e-06
17238210	DNA primase, p49 subunit	Prim1	-2.56	4e-07
17505790	contactin associated protein-like 4	Cntnap4	-2.56	8e-06
17518331	timeless interacting protein	Tipin	-2.56	8.05e-09
17534706	PHD finger protein 6	Phf6	-2.56	1e-06
17405247	exosome component 8	Exosc8	-2.55	5.56e-07
17398557	secreted frizzled-related protein 2	Sfrp2	-2.54	8.37e-08
17407001	ephrin A3	Efna3	-2.54	1.4e-05
17374045			-2.53	0.003398
17547744	CDC28 protein kinase regulatory subunit 2	Cks2	-2.53	1.11e-07
17548303	predicted gene 12891 [Source:MGI Symbol;Acc:MGI:3649646]	Gm12891	-2.53	1.11e-07
17548955	CDC28 protein kinase regulatory subunit 2	Cks2	-2.53	1.11e-07
17224661	Eph receptor A4	Epha4	-2.52	2e-06
17394538	sulfatase 2	Sulf2	-2.52	8.34e-08
17291053	histone cluster 1, H4i	Hist1h4i	-2.51	2.04e-07
17309457	DAZ interacting protein 1	Dzip1	-2.51	2e-06
17378741	neuronatin	Nnat	-2.51	1.1e-05
17403969	RIKEN cDNA 2700069I18 gene	2700069I18Rik	-2.51	9e-06
17221633	minichromosome maintenance deficient 3 (S. cerevisiae)	Mcm3	-2.5	1.32e-07
17274412			-2.5	0.000391
17414017	transmembrane protein with EGF-like and two follistatin-like domains 1	Tmeff1	-2.5	1.9e-05
17520034	protease, serine 35	Prss35	-2.5	5.3e-07
17245422	high mobility group AT-hook 2	Hmga2	-2.48	2.3e-05
17288079	predicted gene, 24588 [Source:MGI Symbol;Acc:MGI:5454365]	Gm24588	-2.48	3e-06
17322075	keratin 4	Krt4	-2.48	0.000105
17550390			-2.48	1.1e-05
17441610	T-box 5	Tbx5	-2.47	5.1e-05
17466932	TLR4 interactor with leucine-rich repeats	Tril	-2.47	1.8e-07
17274394			-2.45	2.3e-05
17337497	zinc finger protein 57	Zfp57	-2.45	4e-06
17348850	ring finger protein 138	Rnf138	-2.45	1.5e-05
17381225	suppressor of variegation 3-9 homolog 2 (Drosophila)	Suv39h2	-2.45	2e-06
17417407	phosphatidylinositol 3 kinase, regulatory subunit, polypeptide 3 (p55)	Pik3r3	-2.45	0.000521
17309154	potassium channel tetramerisation domain containing 12	Kctd12	-2.44	7.97e-08
17547684			-2.44	4.9e-05
17294302	thyroid hormone receptor interactor 13	Trip13	-2.43	4.64e-07
17438530	adhesion G protein-coupled receptor L3	Adgrl3	-2.43	5.15e-07
17295745	centromere protein H	Cenph	-2.42	9.41e-07
17347493	serine/arginine-rich splicing factor 7	Srsf7	-2.42	8.93e-07
17236821	epiphycan	Epyc	-2.41	0.009127
17256225	cell division cycle 6	Cdc6	-2.41	1.33e-08
17405075	protocadherin 18	Pcdh18	-2.41	5.78e-07
17469463	RING1 and YY1 binding protein	Rybp	-2.41	1.27e-08
17249461	follistatin-like 4	Fstl4	-2.4	2.65e-07
17274540	ribonucleotide reductase M2	Rrm2	-2.4	1.42e-08
17315993	retinoic acid induced 14	Rai14	-2.4	7.89e-09
17341595	kringle containing transmembrane protein 2	Kremen2	-2.4	1.42e-07
17373857	cleavage stimulation factor, 3 pre-RNA, subunit 3	Cstf3	-2.4	3.33e-07
17464672	solute carrier family 25 (mitochondrial carrier, adenine nucleotide translocator), member 13	Slc25a13	-2.4	2e-06
17524944	zinc finger protein 599	Zfp599	-2.4	4.2e-05
17421432	predicted gene 13251	Gm13251	-2.39	6.2e-05
17457381	tetratricopeptide repeat domain 26	Ttc26	-2.39	6.81e-07
17505913	centromere protein N	Cenpn	-2.39	7.98e-07
17546234	vesicle-associated membrane protein 7	Vamp7	-2.39	8e-06
17232082	retinoic acid early transcript delta; retinoic acid early transcript 1E; retinoic acid early transcript beta	Raet1d	-2.38	2e-06
17328432	minichromosome maintenance deficient 4 homolog (S. cerevisiae)	Mcm4	-2.38	2.38e-07
17397268	polo-like kinase 4	Plk4	-2.38	3.71e-07
17459097	multimerin 1	Mmrn1	-2.38	1e-06
17501041	caspase 3	Casp3	-2.38	6e-06
17528229	3-hydroxyacyl-CoA dehydratase 3	Hacd3	-2.38	4.64e-07
17544385	tetraspanin 6	Tspan6	-2.38	2.85e-07
17309013	protocadherin 9	Pcdh9	-2.37	0.000118
17339991	echinoderm microtubule associated protein like 4	Eml4	-2.37	6.01e-08
17366121	predicted gene, 26158 [Source:MGI Symbol;Acc:MGI:5455935]	Gm26158	-2.37	2.7e-05
17402402	translocation associated membrane protein 1-like 1	Tram1l1	-2.37	2e-05
17416955	BEN domain containing 5	Bend5	-2.37	6.19e-07
17479834	mex3 homolog B (C. elegans)	Mex3b	-2.37	2e-06
17504321	GINS complex subunit 3 (Psf3 homolog)	Gins3	-2.37	3.52e-07
17261710	spindle apparatus coiled-coil protein 1	Spdl1	-2.36	5.7e-08
17274401	RIKEN cDNA 6030426L16 gene	6030426L16Rik	-2.36	5.76e-09
17489886	cyclin E1	Ccne1	-2.36	7.05e-08
17245059	leucine rich repeat containing G protein coupled receptor 5	Lgr5	-2.35	4e-06
17326081	RIKEN cDNA C330027C09 gene	C330027C09Rik	-2.35	1.14e-07
17350740	lamin B1	Lmnb1	-2.35	1.69e-07
17499849	asparagine-linked glycosylation 11 (alpha-1,2-mannosyltransferase)	Alg11	-2.35	5.17e-08
17543840	expressed sequence C77370	C77370	-2.35	8.28e-07
17372307	integrin alpha 4	Itga4	-2.34	1.29e-07
17465080	aminoadipate-semialdehyde synthase	Aass	-2.34	9e-06
17545121	doublecortin	Dcx	-2.34	2e-06
17211347	transcription factor AP-2 beta	Tfap2b	-2.33	0.00857
17218653	growth arrest specific 5	Gas5	-2.33	4e-06
17295757	cyclin B1	Ccnb1	-2.33	1.67e-08
17308046	neurofilament, medium polypeptide	Nefm	-2.33	0.000967
17400539	histone cluster 2, H2ab	Hist2h2ab	-2.33	3e-06
17405789	tripartite motif-containing 59	Trim59	-2.33	4.26e-08
17493358	DNA damage-induced apoptosis suppressor	Ddias	-2.33	8e-06
17508609	neuregulin 1	Nrg1	-2.33	3e-06
17211458	collagen, type IX, alpha 1	Col9a1	-2.32	0.003469
17230256	adenylosuccinate synthetase, non muscle	Adss	-2.32	8.83e-08
17286587	lymphocyte antigen 86	Ly86	-2.32	0.000506
17309482	UDP-glucose glycoprotein glucosyltransferase 2	Uggt2	-2.32	2e-06
17399086	mex3 homolog A (C. elegans)	Mex3a	-2.32	5.46e-08
17541190	cullin 4B	Cul4b	-2.32	6.95e-08
17244217	rhabdomyosarcoma 2 associated transcript (non-coding RNA)	Rmst	-2.31	0.023615
17348295	THO complex 1	Thoc1	-2.31	1.7e-05
17407010	ephrin A4	Efna4	-2.31	7.36e-08
17413078	predicted gene 13304; predicted gene 10591; predicted gene, 21541; chemokine (C-C motif) ligand 21B (leucine); chemokine (C-C motif) ligand 21C (leucine)	Gm13304	-2.31	1.6e-05
17434230	predicted gene 13304; predicted gene 10591; predicted gene, 21541; chemokine (C-C motif) ligand 21B (leucine); chemokine (C-C motif) ligand 21C (leucine)	Gm13304	-2.31	1.6e-05
17517848	stimulated by retinoic acid gene 6	Stra6	-2.31	1.8e-05
17537861	adipocyte-related X-chromosome expressed sequence 2	Arxes2	-2.31	0.000193
17545135	transient receptor potential cation channel, subfamily C, member 5	Trpc5	-2.31	4.94e-08
17245272	nucleoporin 107	Nup107	-2.3	7.15e-09
17290447	cholinergic receptor, muscarinic 3, cardiac	Chrm3	-2.3	7.23e-07
17388725	four jointed box 1 (Drosophila)	Fjx1	-2.3	7.77e-07
17477734	TEA domain family member 2	Tead2	-2.3	3.73e-08
17261840	hyaluronan mediated motility receptor (RHAMM)	Hmmr	-2.29	3.7e-08
17327331	chromatin assembly factor 1, subunit B (p60)	Chaf1b	-2.29	2.97e-07
17391623	carboxypeptidase X 1 (M14 family)	Cpxm1	-2.29	9.31e-07
17415380	methylthioadenosine phosphorylase	Mtap	-2.29	9.05e-08
17451930	expressed sequence AW549542	AW549542	-2.29	5e-06
17458734	pleckstrin homology domain containing, family A (phosphoinositide binding specific) member 8	Plekha8	-2.29	4e-06
17222001	DNA primase, p58 subunit	Prim2	-2.28	3.37e-07
17252272	MIS12 homolog (yeast)	Mis12	-2.28	1e-06
17307203	spindle and kinetochore associated complex subunit 3	Ska3	-2.28	7.51e-07
17330391	protein O-glucosyltransferase 1	Poglut1	-2.28	1e-06
17350552	proline rich 16	Prr16	-2.28	9.52e-07
17371941	cell division cycle associated 7	Cdca7	-2.28	2e-05
17396106	leucine rich repeat and coiled-coil domain containing 1	Lrrcc1	-2.28	2e-06
17442765	transmembrane protein 132C	Tmem132c	-2.28	5.6e-05
17510701	RNA binding motif protein, X-linked like-1	Rbmxl1	-2.28	4.19e-07
17535930	dyskeratosis congenita 1, dyskerin	Dkc1	-2.28	4.8e-09
17293006	chemokine (C-X-C motif) ligand 14	Cxcl14	-2.27	0.002762
17300893	intraflagellar transport 88	Ift88	-2.27	1.1e-05
17402595	caspase 6; predicted gene, 40150	Casp6	-2.27	3.88e-07
17449488	a disintegrin-like and metallopeptidase (reprolysin type) with thrombospondin type 1 motif, 3	Adamts3	-2.27	1e-06
17451186	myocardial infarction associated transcript (non-protein coding)	Miat	-2.27	0.000181
17537306	kelch-like 4	Klhl4	-2.27	6e-06
17548090			-2.27	0.001584
17237252	nucleosome assembly protein 1-like 1; nucleosome assembly protein 1-like 1 pseudogene	Nap1l1	-2.26	1.93e-07
17289085	dihydrofolate reductase	Dhfr	-2.26	1e-06
17323828	UDP-GlcNAc:betaGal beta-1,3-N-acetylglucosaminyltransferase 5	B3gnt5	-2.26	8.5e-05
17361454	cornichon homolog 2 (Drosophila)	Cnih2	-2.26	6e-05
17408345	hydroxy-delta-5-steroid dehydrogenase, 3 beta- and steroid delta-isomerase 6	Hsd3b6	-2.26	0.001933
17412593	serine/arginine-rich splicing factor 12	Srsf12	-2.26	2.2e-05
17412965	predicted gene 13304; predicted gene 10591; predicted gene, 21541; chemokine (C-C motif) ligand 21B (leucine); chemokine (C-C motif) ligand 21C (leucine)	Gm13304	-2.26	1.3e-05
17413025	predicted gene 13304; predicted gene 10591; predicted gene, 21541; chemokine (C-C motif) ligand 21B (leucine); chemokine (C-C motif) ligand 21C (leucine)	Gm13304	-2.26	1.3e-05
17413123	predicted gene 13304; predicted gene 10591; predicted gene, 21541; chemokine (C-C motif) ligand 21B (leucine); chemokine (C-C motif) ligand 21C (leucine)	Gm13304	-2.26	1.3e-05
17434150	predicted gene 13304; predicted gene 10591; predicted gene, 21541; chemokine (C-C motif) ligand 21B (leucine); chemokine (C-C motif) ligand 21C (leucine)	Gm13304	-2.26	1.3e-05
17518780	carbonic anyhydrase 12	Car12	-2.26	8.2e-05
17522235	cell division cycle 25A	Cdc25a	-2.26	2.01e-09
17528137	zwilch kinetochore protein	Zwilch	-2.26	4.2e-08
17212518	WD repeat domain 75	Wdr75	-2.25	3.92e-07
17258867	baculoviral IAP repeat-containing 5	Birc5	-2.25	6.8e-07
17266563	WD repeat and SOCS box-containing 1	Wsb1	-2.25	5.5e-05
17287336	predicted gene, 22806 [Source:MGI Symbol;Acc:MGI:5452583]	Gm22806	-2.25	3e-06
17290083	embigin	Emb	-2.25	2e-06
17402681	3-phosphoadenosine 5-phosphosulfate synthase 1	Papss1	-2.25	5.25e-07
17465856	pleiotrophin	Ptn	-2.25	2.39e-08
17479041	a disintegrin-like and metallopeptidase (reprolysin type) with thrombospondin type 1 motif, 17	Adamts17	-2.25	2.43e-07
17504649	core binding factor beta	Cbfb	-2.25	3e-06
17233022	CD24a antigen	Cd24a	-2.24	2.4e-05
17239751	small nucleolar RNA, H/ACA box 33	Snora33	-2.24	1e-06
17246860	4-nitrophenylphosphatase domain and non-neuronal SNAP25-like protein homolog 1 (C. elegans)	Nipsnap1	-2.24	1e-05
17278470	vaccinia related kinase 1	Vrk1	-2.24	7e-08
17315860	solute carrier family 1 (glial high affinity glutamate transporter), member 3	Slc1a3	-2.24	0.003157
17316793	R-spondin 2	Rspo2	-2.24	4e-06
17374028	metallophosphoesterase domain containing 2	Mpped2	-2.24	0.000101
17423107	thymocyte selection-associated high mobility group box	Tox	-2.24	1.3e-05
17430824	small nucleolar RNA host gene 3	Snhg3	-2.24	8.69e-07
17470597	solute carrier family 2 (facilitated glucose transporter), member 3	Slc2a3	-2.24	0.000118
17523095	endo/exonuclease (5-3), endonuclease G-like	Exog	-2.24	2e-06
17537878	brain expressed gene 4	Bex4	-2.24	4.9e-05
17211198	sulfatase 1	Sulf1	-2.23	1.29e-07
17280184	zinc finger protein 125	Zfp125	-2.23	0.031935
17302362	bora, aurora kinase A activator	Bora	-2.23	5.91e-07
17358838	kinesin family member 20B	Kif20b	-2.23	2.47e-09
17434285	predicted gene 1987; chemokine (C-C motif) ligand 21A (serine)	Gm1987	-2.23	1.1e-05
17459236	MAD2 mitotic arrest deficient-like 1	Mad2l1	-2.23	4.79e-07
17518636	RIKEN cDNA 2810417H13 gene	2810417H13Rik	-2.23	1.25e-08
17213315	NOP58 ribonucleoprotein	Nop58	-2.22	9e-05
17446981	fibronectin type III domain containing 4	Fndc4	-2.22	1e-06
17294734	predicted gene, 22574 [Source:MGI Symbol;Acc:MGI:5452351]	Gm22574	-2.21	0.001739
17315878	S-phase kinase-associated protein 2 (p45)	Skp2	-2.21	2.08e-08
17403895	leucine rich repeat containing 40	Lrrc40	-2.21	2.13e-07
17416162	disabled 1	Dab1	-2.21	0.000323
17424461	predicted gene 1987; chemokine (C-C motif) ligand 21A (serine)	Gm1987	-2.21	1.1e-05
17456131	testis derived transcript	Tes	-2.21	4.5e-05
17482739	polo-like kinase 1	Plk1	-2.21	1.71e-07
17529383	phosphoglucomutase 3	Pgm3	-2.21	5.55e-08
17545150	lipoma HMGIC fusion partner-like 1	Lhfpl1	-2.21	7.31e-07
17353520	cell division cycle 25C	Cdc25c	-2.2	1e-06
17355391	malic enzyme 2, NAD(+)-dependent, mitochondrial	Me2	-2.2	3.69e-07
17436999	collapsin response mediator protein 1	Crmp1	-2.2	0.003075
17491741			-2.2	3e-06
17544196	highly divergent homeobox	Hdx	-2.2	6.7e-05
17287330	CDC28 protein kinase regulatory subunit 2	Cks2	-2.19	1e-07
17376274	NOP56 ribonucleoprotein	Nop56	-2.19	2.7e-05
17391376	budding uninhibited by benzimidazoles 1 homolog (S. cerevisiae)	Bub1	-2.19	2.57e-08
17409649	vascular cell adhesion molecule 1	Vcam1	-2.19	1.13e-07
17550452			-2.19	8.79e-07
17334299	RAB26, member RAS oncogene family, opposite strand	Rab26os	-2.18	2e-06
17342101	hematological and neurological expressed 1-like	Hn1l	-2.18	2e-06
17547497			-2.18	2.2e-05
17246352	growth differentiation factor 11	Gdf11	-2.17	6e-06
17275832	Fanconi anemia, complementation group M	Fancm	-2.17	5e-06
17288992	EGF-like repeats and discoidin I-like domains 3; predicted gene, 38504	Edil3	-2.17	0.000787
17323198	EF hand calcium binding domain 1	Efcab1	-2.17	9.7e-05
17339729	latent transforming growth factor beta binding protein 1	Ltbp1	-2.17	2e-06
17377459	predicted gene 10130 [Source:MGI Symbol;Acc:MGI:3642547]	Gm10130	-2.17	4e-06
17377525	GINS complex subunit 1 (Psf1 homolog)	Gins1	-2.17	2.23e-07
17396492	eukaryotic translation initiation factor 5A2	Eif5a2	-2.17	4e-06
17398416	platelet-derived growth factor, C polypeptide	Pdgfc	-2.17	2.11e-07
17511550	TOX high mobility group box family member 3	Tox3	-2.17	5.8e-07
17537895	nerve growth factor receptor (TNFRSF16) associated protein 1	Ngfrap1	-2.17	2e-06
17539586	Fanconi anemia, complementation group B	Fancb	-2.17	1e-06
17229128	cDNA sequence BC055324	BC055324	-2.16	7.71e-08
17239435	adhesion G protein-coupled receptor G6	Adgrg6	-2.16	3e-06
17278998			-2.16	0.000411
17301697	tumor necrosis factor receptor superfamily, member 10b	Tnfrsf10b	-2.16	0.008216
17332891	nuclear encoded rRNA 5S 26 [Source:MGI Symbol;Acc:MGI:4421871]	n-R5s26	-2.16	5.3e-05
17380637	cadherin 4	Cdh4	-2.16	1e-06
17398115	pentraxin related gene	Ptx3	-2.16	4.3e-05
17406145	glutamate receptor, ionotropic, AMPA2 (alpha 2)	Gria2	-2.16	0.015077
17519910	Ttk protein kinase	Ttk	-2.16	1.27e-07
17543870	zinc finger, DHHC domain containing 15	Zdhhc15	-2.16	8.44e-07
17305757	WD repeat and HMG-box DNA binding protein 1	Wdhd1	-2.15	4.14e-07
17308928	leukocyte cell derived chemotaxin 1	Lect1	-2.15	0.004729
17402797	centromere protein E	Cenpe	-2.15	4.64e-08
17405062	poly(A) binding protein, cytoplasmic 4-like	Pabpc4l	-2.15	0.000124
17412404	caspase 8 associated protein 2	Casp8ap2	-2.15	2e-06
17421394	SWI/SNF related, matrix associated, actin dependent regulator of chromatin, subfamily a, member 5 pseudogene	Gm13034	-2.15	3e-06
17426956	HAUS augmin-like complex, subunit 6	Haus6	-2.15	4.48e-08
17437278	non-SMC condensin I complex, subunit G	Ncapg	-2.15	6.15e-08
17454226	minichromosome maintenance deficient 7 (S. cerevisiae)	Mcm7	-2.15	1.06e-09
17523494	kinesin family member 15	Kif15	-2.15	6.58e-08
17211258	retinol dehydrogenase 10 (all-trans)	Rdh10	-2.14	1e-06
17218907	NME/NM23 family member 7	Nme7	-2.14	5e-06
17267775	UTP18, small subunit (SSU) processome component, homolog (yeast)	Utp18	-2.14	2.71e-07
17280310	inhibitor of DNA binding 2	Id2	-2.14	1.1e-05
17289602	a disintegrin-like and metallopeptidase (reprolysin type) with thrombospondin type 1 motif, 6	Adamts6	-2.14	1.2e-05
17324398	small nucleolar RNA, H/ACA box 81; eukaryotic translation initiation factor 4A2	Snora81	-2.14	3.7e-05
17341378	zinc finger protein 942	Zfp942	-2.14	3.4e-05
17359020	kinesin family member 11	Kif11	-2.14	1.05e-08
17527934	kinesin family member 23	Kif23	-2.14	2.91e-09
17547853			-2.14	7.8e-05
17227910	hemicentin 1	Hmcn1	-2.13	6e-06
17235831	predicted gene 4767; predicted gene 10778	Gm4767	-2.13	0.000113
17274346	RIKEN cDNA 5730507C01 gene	5730507C01Rik	-2.13	3.6e-05
17291525	SRY (sex determining region Y)-box 4	Sox4	-2.13	1.26e-07
17348276	frizzled homolog 8 (Drosophila)	Fzd8	-2.13	1.04e-08
17466507	enhancer of zeste 2 polycomb repressive complex 2 subunit	Ezh2	-2.13	1.09e-07
17495466	ADP-ribosylation factor-like 6 interacting protein 1	Arl6ip1	-2.13	6.93e-08
17507321	ephrin B2	Efnb2	-2.13	0.000142
17533959	eukaryotic translation initiation factor 2, subunit 3, structural gene X-linked	Eif2s3x	-2.13	2e-05
17225169	small nucleolar RNA, H/ACA box 75; nucleolin	Snora75	-2.12	2.6e-05
17240231			-2.12	1.9e-05
17261550	nucleophosmin 1	Npm1	-2.12	2e-06
17282139	phosphatidylinositol glycan anchor biosynthesis, class H; RIKEN cDNA 9230116L04 gene	Pigh	-2.12	1.1e-05
17304493	guanine nucleotide binding protein-like 3 (nucleolar)	Gnl3	-2.12	2.25e-08
17339476	WD repeat domain 43	Wdr43	-2.12	6.62e-07
17347042	NDC80 homolog, kinetochore complex component (S. cerevisiae)	Ndc80	-2.12	1e-06
17364111	cholesterol 25-hydroxylase	Ch25h	-2.12	0.000526
17372552	family with sequence similarity 171, member B	Fam171b	-2.12	3.1e-05
17414114	structural maintenance of chromosomes 2	Smc2	-2.12	2.22e-07
17428803	kinesin family member 2C	Kif2c	-2.12	8.59e-07
17456084	forkhead box P2	Foxp2	-2.12	0.000285
17456308	potassium voltage-gated channel, Shal-related family, member 2	Kcnd2	-2.12	6.8e-05
17548178	small nuclear ribonucleoprotein Sm D1-like; predicted gene 14277 [Source:MGI Symbol;Acc:MGI:3650350]	LOC105244345	-2.12	2.97e-07
17229433	NUF2, NDC80 kinetochore complex component, homolog (S. cerevisiae)	Nuf2	-2.11	1.77e-07
17252847	predicted gene, 22771 [Source:MGI Symbol;Acc:MGI:5452548]	Gm22771	-2.11	0.001332
17257946	SRY (sex determining region Y)-box 9	Sox9	-2.11	0.000385
17271033	karyopherin (importin) alpha 2	Kpna2	-2.11	9.02e-09
17324394	small nucleolar RNA, C/D box 2; eukaryotic translation initiation factor 4A2	Snord2	-2.11	1.9e-05
17329937	uridine monophosphate synthetase	Umps	-2.11	5e-06
17331987	MIS18 kinetochore protein homolog A (S. pombe)	Mis18a	-2.11	2.7e-07
17338670	fibronectin type 3 and SPRY domain-containing protein	Fsd1	-2.11	0.00078
17366778	predicted gene, 24761 [Source:MGI Symbol;Acc:MGI:5454538]	Gm24761	-2.11	5.1e-05
17411594	UBX domain protein 2B	Ubxn2b	-2.11	4e-06
17413528	maternal embryonic leucine zipper kinase	Melk	-2.11	3.22e-08
17419097	adhesion G protein-coupled receptor B2	Adgrb2	-2.11	5e-05
17419940	serine/arginine-rich splicing factor 10	Srsf10	-2.11	8.1e-05
17434105	C-C motif chemokine 21c; chemokine (C-C motif) ligand 21C (leucine) [Source:MGI Symbol;Acc:MGI:1891386]; predicted gene 10591 [Source:MGI Symbol;Acc:MGI:3711256]; chemokine (C-C motif) ligand 21B (leucine) [Source:MGI Symbol;Acc:MGI:1349182]	LOC100041504	-2.11	1e-05
17468532	germ cell-less homolog 1 (Drosophila)	Gmcl1	-2.11	2.6e-05
17288521	telomerase reverse transcriptase	Tert	-2.1	2.7e-05
17362521	RIKEN cDNA 5730408K05 gene; microRNA 5136	5730408K05Rik	-2.1	1e-06
17402052	spindle assembly 6 homolog (C. elegans)	Sass6	-2.1	2.89e-08
17405724	short stature homeobox 2	Shox2	-2.1	7e-06
17412013	matrix metallopeptidase 16	Mmp16	-2.1	5.96e-08
17274959	twist basic helix-loop-helix transcription factor 1	Twist1	-2.09	9e-06
17333966	zinc finger protein 760	Zfp760	-2.09	1.8e-05
17371374	ceramide synthase 6	Cers6	-2.09	3e-06
17374058	kinesin family member 18A	Kif18a	-2.09	8.04e-08
17396162	carbonic anhydrase 2	Car2	-2.09	3e-06
17415715	ubiquitin specific peptidase 1	Usp1	-2.09	6.91e-08
17426929	basonuclin 2	Bnc2	-2.09	2e-06
17541618	muscleblind-like 3 (Drosophila)	Mbnl3	-2.09	2.34e-07
17550556			-2.09	6.2e-05
17213295	NOP58 ribonucleoprotein	Nop58	-2.08	9e-06
17249176	heterogeneous nuclear ribonucleoprotein H1	Hnrnph1	-2.08	1.6e-05
17312054	KH domain containing, RNA binding, signal transduction associated 3	Khdrbs3	-2.08	1.7e-05
17316754	low density lipoprotein-related protein 12	Lrp12	-2.08	7e-06
17331481	roundabout homolog 2 (Drosophila)	Robo2	-2.08	1.6e-05
17338747	ubiquitin-like, containing PHD and RING finger domains, 1	Uhrf1	-2.08	1.31e-07
17348879	additional sex combs like 3 (Drosophila)	Asxl3	-2.08	1.1e-05
17389481	Rho GTPase activating protein 11A	Arhgap11a	-2.08	2.94e-09
17401790	AKNA domain containing 1	Aknad1	-2.08	1.17e-07
17444802	ribosomal protein L21	Rpl21	-2.08	2e-06
17453776	collagen, type XXVI, alpha 1	Col26a1	-2.08	3e-06
17460405	cytotoxic granule-associated RNA binding protein 1	Tia1	-2.08	1.2e-05
17501292	high mobility group box 2	Hmgb2	-2.08	3.73e-07
17525198	neurotrimin	Ntm	-2.08	1e-06
17525405	DEAD (Asp-Glu-Ala-Asp) box polypeptide 25	Ddx25	-2.08	2.6e-05
17274021	odd-skipped related 1 (Drosophila)	Osr1	-2.07	1.23e-07
17281575	valosin containing protein lysine (K) methyltransferase	Vcpkmt	-2.07	3.3e-05
17286621	RIO kinase 1 (yeast)	Riok1	-2.07	7.97e-07
17298112	wingless-type MMTV integration site family, member 5A	Wnt5a	-2.07	0.000272
17416481	NDC1 transmembrane nucleoporin	Ndc1	-2.07	3.48e-10
17455903	ankyrin repeat and SOCS box-containing 4	Asb4	-2.07	2.49e-07
17536566	kinesin family member 4	Kif4	-2.07	2.38e-07
17547614			-2.07	2.15e-08
17550450			-2.07	6.85e-07
17254670	spindle and kinetochore associated complex subunit 2	Ska2	-2.06	5.94e-07
17287325	sphingosine-1-phosphate receptor 3	S1pr3	-2.06	3.6e-07
17331533	heat shock protein 70 family, member 13	Hspa13	-2.06	1e-06
17375308	WD repeat domain 76	Wdr76	-2.06	1.2e-05
17393562	predicted gene 14230	Gm14230	-2.06	1.1e-05
17410323	GAR1 ribonucleoprotein homolog (yeast)	Gar1	-2.06	7.03e-07
17537019	polysaccharide biosynthesis domain containing 1	Pbdc1	-2.06	1.5e-05
17546246	sprouty homolog 3 (Drosophila)	Spry3	-2.06	8e-05
17228667	pappalysin 2	Pappa2	-2.05	0.000787
17248512	NudC domain containing 2	Nudcd2	-2.05	3.22e-07
17280292	predicted gene 9312 [Source:MGI Symbol;Acc:MGI:3647775]	Gm9312	-2.05	9.3e-05
17281908	transmembrane protein 30B	Tmem30b	-2.05	7e-06
17285157	HEAT repeat containing 1	Heatr1	-2.05	1e-06
17306201	suppressor of Ty 16	Supt16	-2.05	3.9e-07
17329380	replication factor C (activator 1) 4	Rfc4	-2.05	7.43e-09
17332656	RIKEN cDNA A630089N07 gene	A630089N07Rik	-2.05	3e-05
17335234	signal peptide, CUB domain, EGF-like 3	Scube3	-2.05	3e-06
17366758	predicted gene, 24488 [Source:MGI Symbol;Acc:MGI:5454265]; predicted gene, 25701 [Source:MGI Symbol;Acc:MGI:5455478]; predicted gene, 26431 [Source:MGI Symbol;Acc:MGI:5456208]	Gm24488	-2.05	1.3e-05
17366802	predicted gene, 24488 [Source:MGI Symbol;Acc:MGI:5454265]; predicted gene, 25701 [Source:MGI Symbol;Acc:MGI:5455478]; predicted gene, 26431 [Source:MGI Symbol;Acc:MGI:5456208]	Gm24488	-2.05	1.3e-05
17366838	predicted gene, 24488 [Source:MGI Symbol;Acc:MGI:5454265]; predicted gene, 25701 [Source:MGI Symbol;Acc:MGI:5455478]; predicted gene, 26431 [Source:MGI Symbol;Acc:MGI:5456208]	Gm24488	-2.05	1.3e-05
17370745	Rap1 interacting factor 1 homolog (yeast)	Rif1	-2.05	7.04e-07
17414331	family with sequence similarity 206, member A	Fam206a	-2.05	3.48e-08
17425855	INTS3 and NABP interacting protein	Inip	-2.05	1e-05
17439978	cell division cycle 7 (S. cerevisiae)	Cdc7	-2.05	4.48e-08
17488151	melanoma inhibitory activity	Mia	-2.05	0.001633
17492619	Bloom syndrome, RecQ helicase-like	Blm	-2.05	7.63e-07
17249863	glutamate receptor, ionotropic, AMPA1 (alpha 1)	Gria1	-2.04	9e-06
17254249	TAF15 RNA polymerase II, TATA box binding protein (TBP)-associated factor	Taf15	-2.04	7e-06
17270322	elongation factor Tu GTP binding domain containing 2	Eftud2	-2.04	7.3e-07
17279980	visinin-like 1	Vsnl1	-2.04	6.1e-05
17292967	paired-like homeodomain transcription factor 1	Pitx1	-2.04	0.000385
17373530	synaptotagmin XIII	Syt13	-2.04	2e-06
17415231	predicted gene, 34039	Gm34039	-2.04	4e-06
17461448	glutamate receptor, metabotropic 7	Grm7	-2.04	5e-06
17508593	MAK16 homolog (S. cerevisiae)	Mak16	-2.04	5.11e-07
17525007	dpy-19-like 1 (C. elegans)	Dpy19l1	-2.04	3.44e-07
17537397	claudin 34C3	Cldn34c3	-2.04	0.000145
17549344			-2.04	3.4e-08
17264588	chromodomain helicase DNA binding protein 3	Chd3	-2.03	5.24e-07
17309360	SLIT and NTRK-like family, member 1	Slitrk1	-2.03	0.000196
17345977	shugoshin-like 1 (S. pombe)	Sgol1	-2.03	5.7e-07
17353153	solute carrier family 39 (metal ion transporter), member 6	Slc39a6	-2.03	4.02e-07
17410067	N-deacetylase/N-sulfotransferase (heparan glucosaminyl) 3	Ndst3	-2.03	0.000257
17443883	zinc finger protein 157	Zfp157	-2.03	2.4e-05
17466641	insulin-like growth factor 2 mRNA binding protein 3	Igf2bp3	-2.03	5.1e-08
17469339	predicted gene, 26175 [Source:MGI Symbol;Acc:MGI:5455952]	Gm26175	-2.03	0.017214
17506697	ras homolog gene family, member U	Rhou	-2.03	2.4e-05
17510749	ATP-binding cassette, sub-family E (OABP), member 1	Abce1	-2.03	4e-06
17220452	TATA box binding protein (Tbp)-associated factor, RNA polymerase I, A	Taf1a	-2.02	1.21e-07
17237899	cyclin-dependent kinase 4	Cdk4	-2.02	2.42e-08
17299185	G protein-coupled receptor 137C	Gpr137c	-2.02	0.000171
17352120	par-6 family cell polarity regulator gamma	Pard6g	-2.02	3.21e-07
17371146	predicted gene, 25966 [Source:MGI Symbol;Acc:MGI:5455743]	Gm25966	-2.02	0.000564
17415439	intraflagellar transport 74	Ift74	-2.02	9.48e-07
17419773	stathmin 1	Stmn1	-2.02	1e-06
17422988	ribosomal protein S20	Rps20	-2.02	2e-06
17429632	major facilitator superfamily domain containing 2A	Mfsd2a	-2.02	1.7e-05
17468798	minichromosome maintenance deficient 2 mitotin (S. cerevisiae)	Mcm2	-2.02	3e-06
17471222	cyclin D2	Ccnd2	-2.02	5.1e-07
17500626	tumor suppressor candidate 3	Tusc3	-2.02	1.72e-07
17519155	meiosis-specific nuclear structural protein 1	Mns1	-2.02	3.65e-07
17525673	pannexin 3	Panx3	-2.02	0.009433
17540366	predicted gene, 25552 [Source:MGI Symbol;Acc:MGI:5455329]	Gm25552	-2.02	0.003193
17237564	transformed mouse 3T3 cell double minute 1	Mdm1	-2.01	1.44e-08
17286340	forkhead box C1	Foxc1	-2.01	1.9e-05
17288231	RING1 and YY1 binding protein, pseudogene	Rybp-ps	-2.01	0.000239
17334126	serine/arginine repetitive matrix 2; RIKEN cDNA D930048G16 gene	Srrm2	-2.01	5.7e-05
17343580	heterogeneous nuclear ribonucleoprotein M	Hnrnpm	-2.01	1e-06
17356622	cell division cycle associated 5	Cdca5	-2.01	7.57e-07
17360845	empty spiracles homeobox 2	Emx2	-2.01	8.51e-07
17363220	centrosomal protein 78	Cep78	-2.01	2e-06
17374722	RAD51 homolog	Rad51	-2.01	2.4e-05
17390844	myelin basic protein expression factor 2, repressor	Myef2	-2.01	3e-05
17458677	cAMP responsive element binding protein 5	Creb5	-2.01	0.002176
17468627	prokineticin receptor 1	Prokr1	-2.01	1e-05
17545327	trophinin	Tro	-2.01	6.81e-07
17545712	connector enhancer of kinase suppressor of Ras 2	Cnksr2	-2.01	0.000126
17548585	predicted gene 4887	Gm4887	-2.01	4e-06
17213139	basic leucine zipper and W2 domains 1	Bzw1	-2	2.05e-10
17221093	predicted gene 6104 [Source:MGI Symbol;Acc:MGI:3648587]	Gm6104	-2	0.000128
17239142	sterile alpha motif domain containing 5	Samd5	-2	7.4e-05
17255232	leucine rich repeat containing 59	Lrrc59	-2	4.85e-07
17294664	polymerase (RNA) III (DNA directed) polypeptide G	Polr3g	-2	1.2e-05
17315960	BRX1, biogenesis of ribosomes, homolog (S. cerevisiae)	Brix1	-2	2e-06
17343559	zinc finger protein 81	Zfp81	-2	1e-05
17377793	TPX2, microtubule-associated protein homolog (Xenopus laevis)	Tpx2	-2	7.36e-08
17388632	apoptosis inhibitor 5	Api5	-2	5.97e-08
17481102	ribonucleotide reductase M1	Rrm1	-2	1.17e-08
17501976	myo-inositol 1-phosphate synthase A1	Isyna1	-2	1.11e-07
17528750	testis expressed gene 9	Tex9	-2	1.9e-05
17547931			-2	1.79e-07
17255210	transducer of ErbB-2.1	Tob1	2	5.43e-07
17287022	predicted gene, 24915 [Source:MGI Symbol;Acc:MGI:5454692]	Gm24915	2	0.014417
17307113	gap junction protein, alpha 3	Gja3	2	0.000416
17324576	HRAS-like suppressor	Hrasls	2	5e-06
17337834	regulator of calcineurin 2	Rcan2	2	0.002815
17433672	family with sequence similarity 213, member B	Fam213b	2	6.65e-07
17477116	electron transferring flavoprotein, beta polypeptide	Etfb	2	2e-06
17478044	transmembrane protein 143	Tmem143	2	9e-06
17502039	RAB3A, member RAS oncogene family	Rab3a	2	0.000129
17235268	NADH dehydrogenase (ubiquinone) Fe-S protein 7	Ndufs7	2.01	6.51e-07
17277195	prostaglandin reductase 2	Ptgr2	2.01	1e-06
17278789	microRNA 882	Mir882	2.01	0.000199
17278824	microRNA 1193	Mir1193	2.01	6.63e-07
17281843	dehydrogenase/reductase (SDR family) member 7	Dhrs7	2.01	0.000177
17290865	ependymin related protein 1 (zebrafish)	Epdr1	2.01	5.4e-07
17328070	tektin 5	Tekt5	2.01	8.31e-07
17385924	sodium channel, voltage-gated, type III, alpha	Scn3a	2.01	0.038654
17473423	scavenger receptor cysteine rich family, 5 domains	Ssc5d	2.01	1e-06
17510345	bone marrow stromal cell antigen 2	Bst2	2.01	5e-06
17531080	ring finger protein 123	Rnf123	2.01	2.23e-08
17229403	microsomal glutathione S-transferase 3	Mgst3	2.02	9.1e-07
17332628	C2 calcium-dependent domain containing 2	C2cd2	2.02	1.4e-08
17333206	Parkinson disease (autosomal recessive, juvenile) 2, parkin	Park2	2.02	2.1e-05
17338743	feminization 1 homolog a (C. elegans)	Fem1a	2.02	1.92e-07
17343263	salt inducible kinase 1	Sik1	2.02	2.4e-05
17379957	predicted gene 14319 [Source:MGI Symbol;Acc:MGI:3649450]	Gm14319	2.02	5.7e-05
17431187	centrosomal protein 85	Cep85	2.02	2.13e-07
17521996	ubiquinol-cytochrome c reductase core protein 1	Uqcrc1	2.02	4e-06
17213598	zinc finger, DBF-type containing 2	Zdbf2	2.03	3.2e-05
17214948	nuclear antigen Sp100	Sp100	2.03	0.000927
17259623	fructosamine 3 kinase	Fn3k	2.03	2.01e-07
17260944	malate dehydrogenase 1, NAD (soluble)	Mdh1	2.03	4.33e-09
17269889	prostaglandin E synthase 3 (cytosolic)-like	Ptges3l	2.03	5e-06
17278797	predicted gene, 25854 [Source:MGI Symbol;Acc:MGI:5455631]	Gm25854	2.03	1.2e-05
17301899	succinate-Coenzyme A ligase, ADP-forming, beta subunit; predicted gene, 41209	Sucla2	2.03	5.33e-09
17370883	potassium inwardly-rectifying channel, subfamily J, member 3	Kcnj3	2.03	9e-06
17528430	tropomyosin 1, alpha	Tpm1	2.03	1.32e-08
17253037	inositol polyphosphate 5-phosphatase K	Inpp5k	2.04	7.5e-09
17253837	microRNA 365-2	Mir365-2	2.04	4.3e-05
17278711	microRNA 432	Mir432	2.04	1.3e-05
17306692	predicted gene 15932 [Source:MGI Symbol;Acc:MGI:3802106]	Gm15932	2.04	6.7e-05
17510640	Rho GTPase activating protein 10	Arhgap10	2.04	1.61e-08
17549776			2.04	2.3e-05
17217247	phosphoinositide-3-kinase, class 2, beta polypeptide	Pik3c2b	2.05	2.05e-08
17290965	cytochrome c oxidase subunit 5B, mitochondrial	LOC102641600	2.05	1e-06
17321169	ankyrin repeat and SOCS box-containing 8	Asb8	2.05	3.16e-08
17361741	EH domain binding protein 1-like 1	Ehbp1l1	2.05	1e-05
17362342	lectin, galactose binding, soluble 12	Lgals12	2.05	0.01287
17364218	cytoplasmic polyadenylation element binding protein 3	Cpeb3	2.05	4.09e-08
17470879	triosephosphate isomerase 1	Tpi1	2.05	1.63e-07
17472536	ATP-binding cassette, sub-family C (CFTR/MRP), member 9	Abcc9	2.05	1e-06
17494656	GTPase, very large interferon inducible 1; predicted gene 4070	Gvin1	2.05	1.3e-05
17548102	predicted gene 10053 [Source:MGI Symbol;Acc:MGI:3704493]	Gm10053	2.05	2e-06
17548541	cytochrome c, somatic	Cycs	2.05	2e-06
17232119	solute carrier family 2 (facilitated glucose transporter), member 12	Slc2a12	2.06	5e-06
17243544	aldehyde dehydrogenase 1 family, member L2	Aldh1l2	2.06	0.000122
17269210			2.06	2.1e-05
17278791	predicted gene, 22981 [Source:MGI Symbol;Acc:MGI:5452758]	Gm22981	2.06	0.00025
17304012	potassium large conductance calcium-activated channel, subfamily M, alpha member 1	Kcnma1	2.06	5.92e-07
17343278	heat shock transcription factor 2 binding protein	Hsf2bp	2.06	7.43e-07
17369131	phytanoyl-CoA dioxygenase domain containing 1	Phyhd1	2.06	9e-06
17399812	S100 calcium binding protein A6 (calcyclin)	S100a6	2.06	4.7e-05
17441334	RIKEN cDNA C330018A13 gene	C330018A13Rik	2.06	0.000302
17483842	transforming, acidic coiled-coil containing protein 2	Tacc2	2.06	9.02e-09
17492035	pyroglutamyl-peptidase I-like	Pgpep1l	2.06	4.91e-08
17507057	insulin receptor	Insr	2.06	2.85e-10
17526776	neural cell adhesion molecule 1	Ncam1	2.06	4.13e-07
17548018			2.06	3.5e-07
17229629	succinate dehydrogenase complex, subunit C, integral membrane protein	Sdhc	2.07	6.68e-09
17230087	interferon activated gene 203	Ifi203	2.07	4.56e-07
17241308	tetraspanin 15	Tspan15	2.07	6.28e-07
17287005	CAP, adenylate cyclase-associated protein, 2 (yeast)	Cap2	2.07	3.5e-05
17318350	plectin	Plec	2.07	8e-06
17346001	mitichondrial ribosomal protein S36, pseudogene 1	Mrps36-ps1	2.07	2.5e-05
17394668	potassium voltage gated channel, Shab-related subfamily, member 1	Kcnb1	2.07	1.92e-07
17437385	superoxide dismutase 3, extracellular	Sod3	2.07	1e-05
17443535	UFM1-specific peptidase 1	Ufsp1	2.07	9e-06
17548117	predicted pseudogene 6293 [Source:MGI Symbol;Acc:MGI:3649011]	Gm6293	2.07	9e-06
17211365	microRNA 206	Mir206	2.08	0.000325
17230055	interferon-activable protein 203-like	Gm16340	2.08	2e-06
17271350	ATP-binding cassette, sub-family A (ABC1), member 8a	Abca8a	2.08	0.000548
17285859	histone cluster 1, H1c	Hist1h1c	2.08	0.000887
17300802	poly (ADP-ribose) polymerase family, member 4	Parp4	2.08	2e-06
17341540	tumor necrosis factor receptor superfamily, member 12a	Tnfrsf12a	2.08	2.3e-05
17359493	ankyrin repeat domain 2 (stretch responsive muscle)	Ankrd2	2.08	0.043737
17361921	transmembrane 7 superfamily member 2	Tm7sf2	2.08	1.7e-05
17386778	titin	Ttn	2.08	7e-06
17468183	actin, gamma 2, smooth muscle, enteric	Actg2	2.08	0.000463
17506273	cytochrome c oxidase subunit IV isoform 1	Cox4i1	2.08	3e-06
17524028	angiomotin-like 1	Amotl1	2.08	3.15e-08
17215650	leucine rich repeat (in FLII) interacting protein 1	Lrrfip1	2.09	2e-06
17219139	regulator of G-protein signaling 5	Rgs5	2.09	0.000135
17234131	myoregulin	Mrln	2.09	0.000201
17251527	period circadian clock 1	Per1	2.09	8.1e-05
17252200	kinesin family member 1C	Kif1c	2.09	2e-06
17330264	F-box protein 40	Fbxo40	2.09	9e-06
17370273			2.09	0.000623
17371847	pyruvate dehydrogenase kinase, isoenzyme 1	Pdk1	2.09	1e-06
17269995	membrane protein, palmitoylated 3 (MAGUK p55 subfamily member 3)	Mpp3	2.1	1e-06
17354791	microRNA 145a	Mir145a	2.1	0.002961
17418271	four and a half LIM domains 3	Fhl3	2.1	1.6e-05
17487422	basal cell adhesion molecule	Bcam	2.1	0.000435
17537592	sushi-repeat-containing protein, X-linked 2	Srpx2	2.1	2.86e-07
17548981			2.1	6e-06
17549588			2.1	2e-05
17549860			2.1	2e-05
17212982	aldehyde oxidase 1	Aox1	2.11	5.2e-05
17270874	sodium channel, voltage-gated, type IV, alpha	Scn4a	2.11	4.16e-07
17344456	RIKEN cDNA 2310061I04 gene	2310061I04Rik	2.11	1e-06
17384457	stomatin	Stom	2.11	4e-06
17478883	methylmalonyl CoA epimerase	Mcee	2.11	2.48e-07
17283303	coiled-coil domain containing 88C	Ccdc88c	2.12	1.12e-07
17297374	NFKB inhibitor interacting Ras-like protein 1	Nkiras1	2.12	5.67e-09
17297759	annexin A11; predicted gene 2260; predicted gene 2274	Anxa11	2.12	2e-06
17313254	melanin-concentrating hormone receptor 1	Mchr1	2.12	1e-06
17500327	eukaryotic translation initiation factor 4E binding protein 1	Eif4ebp1	2.12	0.000219
17548916			2.12	4.2e-05
17248896	tripartite motif-containing 7	Trim7	2.13	1e-06
17260137	kringle containing transmembrane protein 1	Kremen1	2.13	8.7e-05
17284170	RIKEN cDNA 2010107E04 gene	2010107E04Rik	2.13	4e-06
17324112	family with sequence similarity 131, member A	Fam131a	2.13	2e-06
17467154	protein phosphatase 1K (PP2C domain containing)	Ppm1k	2.13	0.000297
17473166	calcium channel, voltage-dependent, gamma subunit 6	Cacng6	2.13	1.5e-05
17279509	cysteine-rich protein 1 (intestinal)	Crip1	2.14	0.000351
17292562	sema domain, immunoglobulin domain (Ig), transmembrane domain (TM) and short cytoplasmic domain, (semaphorin) 4D	Sema4d	2.14	5e-06
17303958	dual specificity phosphatase and pro isomerase domain containing 1	Dupd1	2.14	1.02e-07
17411147	interferon-induced protein 44	Ifi44	2.14	0.000109
17427860	acyl-CoA thioesterase 11	Acot11	2.14	6e-06
17442185	predicted gene 6444	Gm6444	2.14	1e-05
17494664	very large inducible GTPase 1 pseudogene	Gm8989	2.14	2e-06
17538683	family with sequence similarity 120, member C	Fam120c	2.14	1.11e-09
17260699	cordon-bleu WH2 repeat	Cobl	2.15	0.000114
17278749	microRNA 341	Mir341	2.15	8.09e-07
17278785	predicted gene, 23736 [Source:MGI Symbol;Acc:MGI:5453513]	Gm23736	2.15	0.000287
17278818	microRNA 329	Mir329	2.15	2.2e-05
17322664	SEC14-like lipid binding 5	Sec14l5	2.15	8.85e-07
17331173	ST3 beta-galactoside alpha-2,3-sialyltransferase 6	St3gal6	2.15	3.65e-07
17424092	predicted gene, 25931 [Source:MGI Symbol;Acc:MGI:5455708]	Gm25931	2.15	1.7e-05
17453222	Williams-Beuren syndrome chromosome region 17 homolog (human)	Wbscr17	2.15	1.1e-08
17526861	dihydrolipoamide S-acetyltransferase (E2 component of pyruvate dehydrogenase complex)	Dlat	2.15	2.64e-10
17547505			2.15	0.00047
17278751	microRNA 1188	Mir1188	2.16	6.7e-07
17291193			2.16	0.006463
17319619	NADH dehydrogenase (ubiquinone) 1 alpha subcomplex, 6 (B14)	Ndufa6	2.16	4.35e-09
17322735	methyltransferase like 22	Mettl22	2.16	7e-06
17333320	MAS-related GPR, member H	Mrgprh	2.16	2e-06
17333347	superoxide dismutase 2, mitochondrial	Sod2	2.16	1.2e-09
17334253	enoyl-Coenzyme A delta isomerase 1	Eci1	2.16	8.13e-07
17407850	extracellular matrix protein 1	Ecm1	2.16	1e-06
17483733	BCL2-associated athanogene 3	Bag3	2.16	1e-06
17221553	polycystic kidney and hepatic disease 1	Pkhd1	2.17	8e-06
17236003	t-complex 11 (mouse) like 2	Tcp11l2	2.17	7.74e-07
17243034	MAP kinase-interacting serine/threonine kinase 2	Mknk2	2.17	1.16e-07
17277766	thyroid stimulating hormone receptor	Tshr	2.17	0.000509
17331960			2.17	0.000115
17340197	endothelial PAS domain protein 1	Epas1	2.17	9e-06
17371451	kelch-like 41	Klhl41	2.17	1.1e-05
17398970	myocyte enhancer factor 2D	Mef2d	2.17	1e-06
17550418			2.17	7.61e-07
17231248	G0/G1 switch gene 2	G0s2	2.18	9e-06
17237451	protein tyrosine phosphatase, receptor type, B	Ptprb	2.18	2e-06
17292426	RIKEN cDNA 1110007C09 gene	1110007C09Rik	2.18	7.57e-07
17320307	mitogen-activated protein kinase 12	Mapk12	2.18	1e-05
17381892	3-hydroxyacyl-CoA dehydratase 1	Hacd1	2.18	1.55e-07
17504707	nucleolar protein 3 (apoptosis repressor with CARD domain)	Nol3	2.18	2.78e-07
17278787	snoRNA AF357341	AF357341	2.19	0.000215
17294086	adenylate cyclase 2	Adcy2	2.19	1.5e-07
17324303			2.19	0.020595
17345465	serum response factor	Srf	2.19	2.8e-05
17402996	DNA-damage-inducible transcript 4-like	Ddit4l	2.19	6.44e-08
17292569	sema domain, immunoglobulin domain (Ig), transmembrane domain (TM) and short cytoplasmic domain, (semaphorin) 4D	Sema4d	2.2	9.57e-07
17295456	RIKEN cDNA 2310020H05 gene	2310020H05Rik	2.2	6.29e-07
17326394	filamin A interacting protein 1-like	Filip1l	2.2	4e-06
17404329	glycogenin	Gyg	2.2	9.51e-09
17417898	claudin 19	Cldn19	2.2	2.2e-05
17429476	potassium voltage-gated channel, subfamily Q, member 4	Kcnq4	2.2	2.25e-07
17500922	PDZ and LIM domain 3	Pdlim3	2.2	2.8e-05
17229451			2.21	0.00023
17283955	predicted gene, 26906 [Source:MGI Symbol;Acc:MGI:5477400]	Gm26906	2.21	9.9e-05
17332804	synaptojanin 2	Synj2	2.21	3.95e-08
17519778			2.21	0.000178
17249829			2.22	0.000762
17278814	microRNA 323	Mir323	2.22	8e-06
17312236	GPI-anchored HDL-binding protein 1	Gpihbp1	2.22	1e-06
17397695	spermatogenesis and oogenesis specific basic helix-loop-helix 2	Sohlh2	2.22	2e-06
17411492	predicted gene 11783	Gm11783	2.22	6.1e-05
17461055	predicted gene 15737 [Source:MGI Symbol;Acc:MGI:3783179]	Gm15737	2.22	6e-06
17508125	predicted gene 15816	Gm15816	2.22	2e-06
17514078	angiotensinogen (serpin peptidase inhibitor, clade A, member 8)	Agt	2.22	1.49e-08
17243761	fatty acid binding protein 3, muscle and heart, pseudogene 1 [Source:MGI Symbol;Acc:MGI:101929]	Fabp3-ps1	2.23	0.000252
17259078	ring finger protein 213	Rnf213	2.23	1e-06
17278200	interferon, alpha-inducible protein 27	Ifi27	2.23	8e-06
17361805	nuclear paraspeckle assembly transcript 1 (non-protein coding)	Neat1	2.23	1e-06
17407764	prune homolog (Drosophila)	Prune	2.23	2.82e-07
17410031	synaptopodin 2	Synpo2	2.23	9.92e-08
17410492	tet methylcytosine dioxygenase 2	Tet2	2.23	5.01e-10
17414250	transmembrane protein 38B	Tmem38b	2.23	5.89e-07
17418035	Cbp/p300-interacting transactivator, with Glu/Asp-rich carboxy-terminal domain, 4	Cited4	2.23	8.3e-05
17530159	protein phosphatase 2, regulatory subunit B, alpha	Ppp2r3a	2.23	3.97e-07
17534960	four and a half LIM domains 1	Fhl1	2.23	2.6e-05
17252906	microRNA 22; Mir22 host gene (non-protein coding); TLC domain containing 2	Mir22	2.24	0.000369
17480420	p21 protein (Cdc42/Rac)-activated kinase 1	Pak1	2.24	6.25e-08
17508907	mitochondrial tumor suppressor 1	Mtus1	2.24	2.5e-09
17217101	solute carrier family 41, member 1	Slc41a1	2.25	4.49e-07
17262915	coiled-coil domain containing 69	Ccdc69	2.25	1.4e-05
17380222	phosphoenolpyruvate carboxykinase 1, cytosolic	Pck1	2.25	0.020528
17492031	RIKEN cDNA 4833412C05 gene	4833412C05Rik	2.25	5.3e-05
17421981	tumor necrosis factor receptor superfamily, member 9	Tnfrsf9	2.26	0.000367
17424090	predicted gene, 24112 [Source:MGI Symbol;Acc:MGI:5453889]	Gm24112	2.26	2.4e-05
17458813	aquaporin 1	Aqp1	2.26	3e-06
17474454	dystrophia myotonica-protein kinase	Dmpk	2.26	1.7e-05
17503031	protein kinase, cAMP dependent, catalytic, alpha	Prkaca	2.26	5e-06
17523359	kelch-like 40	Klhl40	2.26	4.7e-05
17529185	filamin A interacting protein 1	Filip1	2.26	6e-06
17211305	peptidase inhibitor 15	Pi15	2.27	7.5e-05
17312341	glutamate receptor, ionotropic, N-methyl D-aspartate-associated protein 1 (glutamate binding)	Grina	2.27	1.59e-07
17513590	F-box protein 31	Fbxo31	2.27	5.36e-08
17327737	sarcalumenin	Srl	2.28	2.7e-05
17522818	glutamate decarboxylase-like 1	Gadl1	2.28	2e-06
17523566	C-type lectin domain family 3, member b	Clec3b	2.28	1.2e-05
17262942	solute carrier family 36 (proton/amino acid symporter), member 2	Slc36a2	2.29	0.021166
17322700	RNA binding protein, fox-1 homolog (C. elegans) 1	Rbfox1	2.29	7.78e-07
17424088	microRNA 5123	Mir5123	2.29	0.00022
17528350	F-box and leucine-rich repeat protein 22	Fbxl22	2.29	1e-05
17239919	laminin, alpha 2	Lama2	2.3	4e-06
17267584	A kinase (PRKA) anchor protein 1	Akap1	2.3	7.79e-09
17363757	RIKEN cDNA 4430402I18 gene	4430402I18Rik	2.3	4.06e-07
17382802	ubiquitin associated domain containing 1	Ubac1	2.3	6.95e-08
17542642	deoxyribonuclease 1-like 1	Dnase1l1	2.3	5.37e-07
17240303	RIKEN cDNA G630090E17 gene	G630090E17Rik	2.31	1.1e-05
17290263	aldo-keto reductase family 1, member C18	Akr1c18	2.31	8.41e-08
17371912	sterile alpha motif and leucine zipper containing kinase AZK	Zak	2.31	4.86e-08
17496354	sulfotransferase family 1A, phenol-preferring, member 1	Sult1a1	2.31	5.5e-05
17509780	solute carrier family 18 (vesicular monoamine), member 1	Slc18a1	2.31	5.54e-07
17547877	DEP domain containing MTOR-interacting protein	Deptor	2.31	3e-06
17222825	nucleic acid binding protein 1	Nabp1	2.32	3e-06
17278795	predicted gene, 23787 [Source:MGI Symbol;Acc:MGI:5453564]	Gm23787	2.32	2.2e-05
17278856	microRNA 668	Mir668	2.32	6.1e-07
17340673	fibronectin type III domain containing 1	Fndc1	2.32	0.000147
17515539	endonuclease/exonuclease/phosphatase family domain containing 1	Eepd1	2.32	1.37e-07
17251179	myosin, heavy polypeptide 13, skeletal muscle	Myh13	2.33	2e-06
17306696	ER membrane protein complex subunit 9	Emc9	2.33	1.72e-07
17400592	hemochromatosis type 2 (juvenile) (human homolog)	Hfe2	2.33	0.000143
17456772	striatin interacting protein 2	Strip2	2.33	5.92e-09
17468501	RIKEN cDNA 2310040G24 gene	2310040G24Rik	2.33	1.16e-08
17230252	RIKEN cDNA 2310043L19 gene	2310043L19Rik	2.34	1e-05
17361141	carnosine synthase 1	Carns1	2.34	1.88e-07
17419902	myomesin family, member 3	Myom3	2.34	0.000292
17423665	four and a half LIM domains 5	Fhl5	2.34	9e-06
17550426			2.34	9.41e-07
17278854	microRNA 134; miRNA containing gene	Mir134	2.35	8e-06
17324404	adiponectin, C1Q and collagen domain containing	Adipoq	2.35	0.001525
17328368	myosin, heavy polypeptide 11, smooth muscle	Myh11	2.35	2e-06
17369911	adenylate kinase 1	Ak1	2.35	2e-06
17385099	nebulin	Neb	2.35	6e-06
17413191	DnaJ (Hsp40) homolog, subfamily B, member 5	Dnajb5	2.35	5.63e-07
17483242	myosin light chain, phosphorylatable, fast skeletal muscle	Mylpf	2.35	2.2e-05
17230078	myeloid cell nuclear differentiation antigen; interferon activated gene 204	Mnda	2.36	9.1e-05
17243113	leucine rich repeat and Ig domain containing 3	Lingo3	2.36	5e-06
17475787	dual-specificity tyrosine-(Y)-phosphorylation regulated kinase 1b	Dyrk1b	2.36	1.31e-07
17497421	BCL2/adenovirus E1B interacting protein 3	Bnip3	2.36	0.000742
17234066	ankyrin 3, epithelial	Ank3	2.37	9e-06
17260175	predicted gene, 22471 [Source:MGI Symbol;Acc:MGI:5452248]	Gm22471	2.37	0.000188
17298262	musculoskeletal, embryonic nuclear protein 1	Mustn1	2.37	0.000124
17322429	protein phosphatase 1, regulatory (inhibitor) subunit 1A	Ppp1r1a	2.37	2.84e-07
17477811	glycogen synthase 1, muscle	Gys1	2.37	2.13e-07
17548765			2.37	1.3e-05
17273526	Rab40B, member RAS oncogene family	Rab40b	2.38	5e-06
17318160	v-maf musculoaponeurotic fibrosarcoma oncogene family, protein A (avian)	Mafa	2.38	6e-06
17335506	peptidase inhibitor 16	Pi16	2.39	3e-06
17403070	alcohol dehydrogenase 1 (class I); predicted gene, 40156	Adh1	2.39	2e-06
17476639	predicted pseudogene 5327 [Source:MGI Symbol;Acc:MGI:3647424]	Gm5327	2.39	2.3e-05
17278747			2.4	1.1e-05
17278858	microRNA 485; miRNA containing gene	Mir485	2.4	1e-05
17306937	chymase 1, mast cell	Cma1	2.4	0.008788
17487952	carcinoembryonic antigen-related cell adhesion molecule 1	Ceacam1	2.4	0.000355
17518911	RAR-related orphan receptor alpha	Rora	2.4	2.29e-08
17224360	protein kinase, AMP-activated, gamma 3 non-catatlytic subunit	Prkag3	2.41	4e-06
17288616	tubulin polymerization promoting protein	Tppp	2.41	3e-06
17291674	myosin light chain kinase family, member 4	Mylk4	2.41	1.8e-05
17370043	angiopoietin-like 2	Angptl2	2.41	2e-06
17461477	LIM and cysteine-rich domains 1	Lmcd1	2.41	4.4e-05
17467209	family with sequence similarity 13, member A	Fam13a	2.41	5.43e-08
17278820	microRNA 494	Mir494	2.42	9e-06
17432808	mitofusin 2	Mfn2	2.42	4.77e-09
17278828	microRNA 543	Mir543	2.43	7.43e-08
17472955	transmembrane and tetratricopeptide repeat containing 1	Tmtc1	2.43	8.36e-07
17549502			2.43	2e-06
17549654			2.43	2e-06
17256924	ankyrin repeat and SOCS box-containing 16	Asb16	2.44	7.74e-08
17460826	Kruppel-like factor 15	Klf15	2.44	3.56e-07
17464282	sarcospan	Sspn	2.44	5.37e-07
17229307	dual specificity phosphatase 27 (putative)	Dusp27	2.45	3.5e-05
17397333	predicted gene, 30289; La ribonucleoprotein domain family, member 1B	Gm30289	2.45	6e-06
17424105	aquaporin 7	Aqp7	2.45	7.79e-07
17437836	cholinergic receptor, nicotinic, alpha polypeptide 9	Chrna9	2.46	2e-06
17449108	trans-2,3-enoyl-CoA reductase-like	Tecrl	2.46	2.3e-05
17522634	RIKEN cDNA 2310075C17 gene	2310075C17Rik	2.46	1e-06
17234403	gamma-glutamyltransferase 5	Ggt5	2.47	1.2e-05
17255458	phosphatase, orphan 1; zinc finger protein 652	Phospho1	2.47	3.4e-05
17318013	Ly6/neurotoxin 1	Lynx1	2.47	4e-06
17342029	NADH dehydrogenase (ubiquinone) 1 beta subcomplex, 10	Ndufb10	2.47	7.55e-08
17507605	growth arrest specific 6	Gas6	2.47	0.00011
17255853	CDGSH iron sulfur domain 3	Cisd3	2.48	1.6e-08
17257651	predicted gene 11716	Gm11716	2.48	1.7e-05
17278688	microRNA 673	Mir673	2.48	2.95e-07
17390810	glycine amidinotransferase (L-arginine:glycine amidinotransferase)	Gatm	2.48	1.2e-05
17479259	ATP/GTP binding protein-like 1	Agbl1	2.48	0.000245
17480729	uncoupling protein 3 (mitochondrial, proton carrier)	Ucp3	2.48	2.1e-05
17296317	heat shock protein 3	Hspb3	2.49	1.6e-05
17297801	predicted gene 2260; predicted gene 2274	Gm2260	2.49	3.08e-07
17297833	predicted gene 2260; predicted gene 2274	Gm2260	2.49	3.08e-07
17440312	fibroblast growth factor receptor-like 1	Fgfrl1	2.49	2.27e-07
17517112			2.49	0.000156
17278850	microRNA 544	Mir544	2.5	1e-06
17492018	synemin, intermediate filament protein	Synm	2.5	4.46e-08
17517727	cytochrome c oxidase subunit Va	Cox5a	2.5	1.04e-07
17292390	WNK lysine deficient protein kinase 2	Wnk2	2.51	1.19e-07
17301055	C1q and tumor necrosis factor related protein 9	C1qtnf9	2.51	2e-06
17375006	glucosidase, alpha; neutral C; calpain 3	Ganc	2.51	2e-05
17440711	RIKEN cDNA 1700095B10 gene	1700095B10Rik	2.51	7.7e-05
17287148	extracellular matrix protein 2, female organ and adipocyte specific	Ecm2	2.52	7e-06
17383886	RIKEN cDNA 1110008P14 gene	1110008P14Rik	2.52	1e-06
17443185	MLX interacting protein-like	Mlxipl	2.52	1.7e-05
17485320	potassium voltage-gated channel, subfamily Q, member 1	Kcnq1	2.52	1.88e-08
17493875	purinergic receptor P2Y, G-protein coupled 2	P2ry2	2.52	3e-06
17265657	smoothelin-like 2	Smtnl2	2.53	5e-06
17278852	microRNA 382	Mir382	2.53	1.53e-07
17367385	OTU domain containing 1	Otud1	2.53	9.8e-05
17380199	RNA binding motif protein 38	Rbm38	2.53	2e-06
17442909	glioblastoma amplified sequence	Gbas	2.53	7.48e-09
17496408	aldolase A, fructose-bisphosphate	Aldoa	2.53	7e-06
17266534	kinase suppressor of ras 1	Ksr1	2.54	8.23e-07
17290890	RIKEN cDNA A530099J19 gene	A530099J19Rik	2.54	0.001032
17328062	epithelial membrane protein 2	Emp2	2.54	1.65e-07
17347801	prolyl endopeptidase-like	Prepl	2.54	2.89e-09
17278826	microRNA 666	Mir666	2.55	1.5e-05
17423781	peptidase M20 domain containing 2	Pm20d2	2.56	1.52e-07
17439741	AF4/FMR2 family, member 1	Aff1	2.56	1.76e-08
17469360	leiomodin 3 (fetal)	Lmod3	2.56	1.2e-05
17492406	perilipin 1	Plin1	2.56	0.001576
17520835	kyphoscoliosis peptidase	Ky	2.56	4.4e-05
17278810	microRNA 380	Mir380	2.57	1e-06
17313394	aconitase 2, mitochondrial	Aco2	2.57	1.23e-08
17420777	aldehyde dehydrogenase 4 family, member A1	Aldh4a1	2.57	6.02e-08
17479736	transmembrane 6 superfamily member 1	Tm6sf1	2.57	8e-06
17550486			2.57	2e-06
17244506	mitochondrial ribosomal protein L42	Mrpl42	2.58	7e-06
17278848	microRNA 539	Mir539	2.58	1.6e-05
17284037	mitochondrial pyruvate carrier 1; mitochondrial pyruvate carrier 1, pseudogene	Mpc1	2.58	5.11e-08
17421764			2.58	7.2e-05
17425533	erythrocyte membrane protein band 4.1 like 4b	Epb41l4b	2.58	1.59e-08
17449084	insulin-like growth factor binding protein 7	Igfbp7	2.58	6e-06
17521300	cytokine inducible SH2-containing protein	Cish	2.58	5.56e-09
17214368	cytochrome P450, family 27, subfamily a, polypeptide 1	Cyp27a1	2.59	8.22e-07
17233303			2.59	1.3e-05
17242842	guanidinoacetate methyltransferase	Gamt	2.59	9.6e-05
17280062	lipin 1	Lpin1	2.59	5e-06
17349209	LIM and senescent cell antigen like domains 2	Lims2	2.59	5.47e-07
17399583	tropomyosin 3, gamma	Tpm3	2.59	0.000304
17225379	ankyrin repeat and SOCS box-containing 18	Asb18	2.6	2e-06
17324446	receptor transporter protein 4	Rtp4	2.6	1e-06
17354599	myozenin 3	Myoz3	2.6	2e-06
17436043	tripartite motif-containing 54	Trim54	2.6	1.8e-05
17432256	solute carrier family 25, member 34	Slc25a34	2.61	1e-06
17411323	acyl-Coenzyme A dehydrogenase, medium chain	Acadm	2.62	2.42e-10
17483568	tripartite motif-containing 72	Trim72	2.62	9e-06
17215697	receptor (calcitonin) activity modifying protein 1	Ramp1	2.63	3.26e-08
17229269	RCSD domain containing 1	Rcsd1	2.63	2.04e-07
17248213	cytoplasmic polyadenylation element binding protein 4	Cpeb4	2.63	1.7e-08
17280144	potassium voltage-gated channel, subfamily F, member 1	Kcnf1	2.63	9.11e-09
17350378	laeverin	Lvrn	2.63	1.86e-07
17369379	hemicentin 2	Hmcn2	2.63	7.85e-09
17401041	calsequestrin 2	Casq2	2.63	3.9e-05
17457913	chloride channel, voltage-sensitive 1	Clcn1	2.64	2e-06
17470074	transmembrane protein 72	Tmem72	2.64	3e-06
17548748	uncharacterized LOC105243404	LOC105243404	2.64	3.69e-08
17364208	protein phosphatase 1, regulatory (inhibitor) subunit 3C	Ppp1r3c	2.65	5.95e-08
17462145	RIKEN cDNA 8430408G22 gene	8430408G22Rik	2.65	2.6e-05
17477670	Harvey rat sarcoma oncogene, subgroup R	Rras	2.65	3.1e-05
17504146	coenzyme Q9 homolog (yeast)	Coq9	2.65	6.66e-08
17512434	tubulin polymerization-promoting protein family member 3	Tppp3	2.65	4.8e-05
17521314	RIKEN cDNA 6430571L13 gene	6430571L13Rik	2.65	1.3e-07
17223903	acyl-Coenzyme A dehydrogenase, long-chain	Acadl	2.66	1.26e-07
17342483	family with sequence similarity 195, member A	Fam195a	2.66	6.42e-07
17399460	pre B cell leukemia transcription factor interacting protein 1	Pbxip1	2.66	3e-06
17303625	nuclear receptor subfamily 1, group D, member 2	Nr1d2	2.67	1.21e-07
17407829	ADAMTS-like 4	Adamtsl4	2.67	2.2e-08
17448735	SLAIN motif family, member 2	Slain2	2.67	3.6e-05
17250500	mitochondrial elongation factor 2	Mief2	2.68	4e-06
17307446	sarcoglycan, gamma (dystrophin-associated glycoprotein)	Sgcg	2.68	2e-05
17339876	glutaminyl-peptide cyclotransferase (glutaminyl cyclase)	Qpct	2.68	8.16e-08
17364474	PDZ and LIM domain 1 (elfin)	Pdlim1	2.68	4e-06
17280836	leucine-rich single-pass membrane protein 1	Lsmem1	2.69	3.1e-05
17397288	predicted gene 2011; RIKEN cDNA 3110057O12 gene	Gm2011	2.69	1.75e-08
17445089	furry homolog (Drosophila)	Fry	2.69	1.61e-09
17509775			2.69	1.8e-05
17357004	MACRO domain containing 1	Macrod1	2.7	8.45e-07
17494651	very large inducible GTPase 1 pseudogene	Gm8979	2.7	3.03e-07
17278884	microRNA 541	Mir541	2.71	4e-06
17371939			2.71	7e-06
17373240	protein kinase C and casein kinase substrate in neurons 3	Pacsin3	2.71	5.87e-07
17441037	2-5 oligoadenylate synthetase-like 2	Oasl2	2.71	6e-06
17494649	GTPase, very large interferon inducible 1 pseudogene; predicted gene 4070	Gm17757	2.71	5e-06
17494662	GTPase, very large interferon inducible 1 pseudogene; predicted gene 4070	Gm18853	2.71	9.74e-07
17530863	mitogen-activated protein kinase-activated protein kinase 3	Mapkapk3	2.71	4.37e-07
17497718	interferon induced transmembrane protein 3	Ifitm3	2.72	5.5e-07
17527532	mannose phosphate isomerase	Mpi	2.72	1.49e-09
17211367	microRNA 133b	Mir133b	2.73	4e-06
17347633	predicted gene, 19689	Gm19689	2.73	2.1e-05
17426621	RIKEN cDNA 2310002L09 gene	2310002L09Rik	2.73	2.6e-05
17454209	gap junction protein, gamma 3	Gjc3	2.73	4.1e-05
17468018	hexokinase 2	Hk2	2.73	3.63e-09
17302429	LIM domain only 7	Lmo7	2.74	3e-06
17317153	syntrophin, basic 1	Sntb1	2.74	2e-06
17390079	phospholipase A2, group IVE	Pla2g4e	2.74	2.98e-07
17513995	actin, alpha 1, skeletal muscle	Acta1	2.74	8.3e-05
17234910	cell division cycle 34	Cdc34	2.75	4e-05
17312396	cytochrome c-1	Cyc1	2.75	9.16e-07
17549594			2.75	1.3e-05
17303964	dual specificity phosphatase 13	Dusp13	2.76	4.18e-07
17366953	protein kinase C, theta	Prkcq	2.76	1e-06
17351952	ST8 alpha-N-acetyl-neuraminide alpha-2,8-sialyltransferase 5	St8sia5	2.77	5.01e-07
17420154	wingless-type MMTV integration site family, member 4	Wnt4	2.77	7e-06
17211004	alcohol dehydrogenase, iron containing, 1	Adhfe1	2.78	0.000906
17278704	RIKEN cDNA 6430411K18 gen; microRNA 127; microRNA 433	6430411K18Rik	2.78	9.58e-07
17364484	sorbin and SH3 domain containing 1	Sorbs1	2.78	4.13e-08
17236227	5-nucleotidase domain containing 3	Nt5dc3	2.79	1.74e-09
17282309	solute carrier family 8 (sodium/calcium exchanger), member 3	Slc8a3	2.79	6.55e-08
17367963	ectonucleoside triphosphate diphosphohydrolase 2; neural proliferation, differentiation and control 1	Entpd2	2.79	8.9e-08
17264306	RIKEN cDNA 2310065F04 gene	2310065F04Rik	2.8	4.81e-08
17302869	citrate lyase beta like	Clybl	2.8	7.32e-07
17325592	popeye domain containing 2	Popdc2	2.8	2e-06
17232763	D-aspartate oxidase	Ddo	2.81	2e-06
17278700	microRNA 3070b	Mir3070b	2.81	6e-06
17278840	microRNA 376a	Mir376a	2.81	0.000158
17410630	predicted gene 5105	Gm5105	2.81	4.92e-07
17533207	Kell blood group precursor (McLeod phenotype) homolog	Xk	2.81	5.26e-07
17222668	methyltransferase like 21C	Mettl21c	2.82	2.01e-07
17229948	dual specificity phosphatase 23	Dusp23	2.82	1.6e-08
17318950	colony stimulating factor 2 receptor, beta 2, low-affinity (granulocyte-macrophage)	Csf2rb2	2.82	3.22e-07
17468747	kelch repeat and BTB (POZ) domain containing 12	Kbtbd12	2.82	6.85e-07
17524451	collagen, type V, alpha 3	Col5a3	2.82	9.28e-07
17265129	acyl-Coenzyme A dehydrogenase, very long chain	Acadvl	2.83	1.56e-07
17278698	microRNA 3070a	Mir3070a	2.83	6e-06
17517132	crystallin, alpha B	Cryab	2.83	0.000284
17518512	cartilage intermediate layer protein, nucleotide pyrophosphohydrolase	Cilp	2.83	0.000142
17550428			2.83	5e-06
17366525	upper zone of growth plate and cartilage matrix associated	Ucma	2.84	0.000149
17479628	alpha-kinase 3	Alpk3	2.84	5.6e-05
17278836	microRNA 654	Mir654	2.85	1.9e-05
17231789	taxilin beta	Txlnb	2.86	8.54e-07
17462663	microfibrillar associated protein 5	Mfap5	2.86	0.000105
17303882	synaptopodin 2-like	Synpo2l	2.87	8e-06
17354739	peroxisome proliferative activated receptor, gamma, coactivator 1 beta	Ppargc1b	2.87	9.86e-07
17457143	aldo-keto reductase family 1, member B10 (aldose reductase)	Akr1b10	2.87	9e-06
17459038	hect domain and RLD 3	Herc3	2.87	3.05e-10
17501214			2.87	1.15e-08
17538096	ring finger protein 128	Rnf128	2.87	1.17e-08
17532540	FYVE and coiled-coil domain containing 1; predicted gene 17021	Fyco1	2.88	4.85e-08
17315305	insulin-like growth factor binding protein 6	Igfbp6	2.89	5e-06
17394015	junctophilin 2	Jph2	2.89	5e-06
17488608	ryanodine receptor 1, skeletal muscle	Ryr1	2.89	2e-06
17534489	proline rich 32	Prr32	2.89	1.1e-05
17278753	predicted gene, 23912 [Source:MGI Symbol;Acc:MGI:5453689]	Gm23912	2.9	6.2e-08
17278844	microRNA 381	Mir381	2.9	3.2e-05
17453055	RIKEN cDNA 5930412G12 gene	5930412G12Rik	2.91	1.25e-07
17528247	kelch repeat and BTB (POZ) domain containing 13	Kbtbd13	2.91	1e-06
17278696	microRNA 665	Mir665	2.92	3e-06
17268691	calcium channel, voltage-dependent, beta 1 subunit	Cacnb1	2.93	4.28e-07
17285851	histone cluster 1, H2bc	Hist1h2bc	2.94	1.32e-07
17501228			2.94	6.63e-08
17214487	SPEG complex locus	Speg	2.95	6.04e-08
17227160	protein phosphatase 1, regulatory (inhibitor) subunit 12B	Ppp1r12b	2.95	6.27e-10
17381078	uridine-cytidine kinase 1-like 1, opposite strand	Uckl1os	2.95	3.13e-09
17406423	glycosyltransferase 28 domain containing 2; family with sequence similarity 160, member A1; ADP-ribosylation factor interacting protein 1	Glt28d2	2.95	3.68e-07
17396765	ubiquitin specific peptidase 13 (isopeptidase T-3)	Usp13	2.96	7.58e-09
17410022	myozenin 2	Myoz2	2.96	4.1e-05
17436877	actin-binding LIM protein 2	Ablim2	2.96	3.18e-07
17539110	small muscle protein, X-linked	Smpx	2.96	1.1e-05
17522439	myosin, light polypeptide 3	Myl3	2.97	0.000117
17278702	microRNA 431	Mir431	2.98	2e-06
17278846	microRNA 487b	Mir487b	2.98	8.79e-07
17391094	histidine decarboxylase	Hdc	2.98	0.001364
17501224			2.98	1e-06
17212301	transmembrane protein 182	Tmem182	2.99	1.6e-05
17315178	nuclear receptor subfamily 4, group A, member 1	Nr4a1	2.99	2.33e-07
17364932	glutamic-oxaloacetic transaminase 1, soluble	Got1	2.99	3.12e-09
17278860	miRNA containing gene; microRNA 410; microRNA 412; microRNA 369	Mirg	3	4.65e-07
17346136	perilipin 5	Plin5	3	3.34e-07
17413770	tropomodulin 1	Tmod1	3	1.9e-05
17519438	myosin VC	Myo5c	3.01	8.8e-07
17278755	microRNA 370	Mir370	3.02	7.79e-07
17474547	reticulon 2 (Z-band associated protein)	Rtn2	3.03	4e-06
17230484	epoxide hydrolase 1, microsomal	Ephx1	3.04	3e-06
17375045	calpain 3	Capn3	3.04	8e-06
17410275	epidermal growth factor	Egf	3.04	4.46e-09
17326567	glucan (1,4-alpha-), branching enzyme 1	Gbe1	3.07	9.77e-10
17339395	myomesin 1	Myom1	3.07	3e-06
17445715	CD36 antigen	Cd36	3.07	7e-06
17448449	predicted gene 15949 [Source:MGI Symbol;Acc:MGI:3801730]	Gm15949	3.07	1.7e-05
17506042	cadherin 13	Cdh13	3.08	3.1e-08
17314476	transmembrane protein 117	Tmem117	3.09	4e-06
17253215	solute carrier family 6 (neurotransmitter transporter, serotonin), member 4	Slc6a4	3.1	8e-06
17300544	fat storage-inducing transmembrane protein 1	Fitm1	3.1	9.05e-07
17357072	phospholipase A2, group XVI	Pla2g16	3.1	3.57e-08
17481057	ADP-ribosyltransferase 1	Art1	3.1	3e-06
17491368	cysteine and glycine-rich protein 3	Csrp3	3.1	0.000252
17233930	catenin (cadherin associated protein), alpha 3	Ctnna3	3.11	1.76e-08
17498722	resistin	Retn	3.11	0.001233
17325686	zinc finger and BTB domain containing 20	Zbtb20	3.12	4.43e-08
17407956	carbonic anhydrase 14	Car14	3.12	9.82e-08
17498115	proline rich 33	Prr33	3.12	1.84e-07
17364192	RIKEN cDNA 1500017E21 gene	1500017E21Rik	3.13	1e-06
17535572	ATPase, Ca++ transporting, plasma membrane 3	Atp2b3	3.13	8.12e-07
17403039	uncharacterized LOC102634333	LOC102634333	3.14	5e-06
17469754	cell death-inducing DFFA-like effector c	Cidec	3.14	0.004418
17224125	melanoregulin	Mreg	3.15	1.68e-09
17278886	microRNA 409	Mir409	3.17	3e-06
17283516	ankyrin repeat and SOCS box-containing 2	Asb2	3.17	1.1e-05
17420064	transcription elongation factor A (SII), 3	Tcea3	3.17	6.38e-07
17238605	integrin alpha 7	Itga7	3.2	6.3e-05
17278878	microRNA 154	Mir154	3.2	1e-06
17530923	leucine-rich single-pass membrane protein 2	Lsmem2	3.2	1.77e-07
17219222	myelin protein zero	Mpz	3.21	9.4e-05
17519573	kelch-like 31	Klhl31	3.21	2e-06
17291694	serine (or cysteine) peptidase inhibitor, clade B, member 1a	Serpinb1a	3.22	1e-06
17318403	predicted gene, 25720 [Source:MGI Symbol;Acc:MGI:5455497]	Gm25720	3.22	2.6e-05
17421867	G protein-coupled receptor 157	Gpr157	3.25	2.7e-08
17261865	cyclin G1	Ccng1	3.26	2.41e-09
17243102	junctional sarcoplasmic reticulum protein 1	Jsrp1	3.27	3.35e-07
17477774	histidine rich calcium binding protein	Hrc	3.27	1e-06
17443069	GATS protein-like 2	Gatsl2	3.29	1.52e-07
17463501	C-type lectin domain family 2, member d	Clec2d	3.31	2e-06
17378348	transformation related protein 53 inducible nuclear protein 2	Trp53inp2	3.32	7.67e-09
17510983			3.33	6e-06
17242839			3.34	0.000617
17217678	calcium channel, voltage-dependent, L type, alpha 1S subunit	Cacna1s	3.35	1e-06
17243910	myosin binding protein C, slow-type	Mybpc1	3.35	1e-05
17278834	microRNA 376c	Mir376c	3.35	2.6e-05
17517390	isocitrate dehydrogenase 3 (NAD+) alpha	Idh3a	3.35	3.49e-12
17268107	sarcoglycan, alpha (dystrophin-associated glycoprotein)	Sgca	3.37	3e-06
17501220			3.38	6.25e-08
17501222			3.38	6.25e-08
17224540	tubulin, alpha 4A	Tuba4a	3.41	5e-06
17278713	microRNA 136	Mir136	3.41	7e-06
17263223	obscurin, cytoskeletal calmodulin and titin-interacting RhoGEF	Obscn	3.42	3.99e-07
17456414	ankyrin repeat and SOCS box-containing 15	Asb15	3.42	1.31e-07
17462954	splA/ryanodine receptor domain and SOCS box containing 2	Spsb2	3.44	3.1e-05
17215750	kelch-like 30	Klhl30	3.45	8.31e-07
17214476	desmin	Des	3.47	5.2e-05
17352862	aquaporin 4	Aqp4	3.47	1.44e-07
17286973	guanosine monophosphate reductase	Gmpr	3.48	4e-06
17278830	microRNA 495	Mir495	3.5	3.3e-05
17278880	microRNA 496a	Mir496a	3.51	6e-08
17246100	coenzyme Q10 homolog A (yeast)	Coq10a	3.52	1.76e-07
17334091	host cell factor C1 regulator 1 (XPO1-dependent)	Hcfc1r1	3.52	1.92e-08
17386396	solute carrier family 25 (mitochondrial carrier, Aralar), member 12	Slc25a12	3.52	5.2e-10
17502462	transmembrane protein 38A	Tmem38a	3.52	1.77e-07
17536078	dystrophin, muscular dystrophy	Dmd	3.52	3.12e-07
17235597	ataxia, cerebellar, Cayman type homolog (human), opposite strand	Atcayos	3.53	2e-06
17227311	shisa family member 4	Shisa4	3.54	4.69e-09
17283958	retrotransposon-like 1; microRNA 3071	Rtl1	3.54	3e-06
17278709	microRNA 434	Mir434	3.55	1.5e-05
17394267	troponin C2, fast	Tnnc2	3.55	4e-06
17278694	microRNA 540	Mir540	3.56	1e-06
17281084	egl-9 family hypoxia-inducible factor 3	Egln3	3.58	1.29e-08
17489464	sodium channel, voltage-gated, type I, beta	Scn1b	3.58	3.08e-08
17358214	Kruppel-like factor 9	Klf9	3.59	1.29e-09
17313705	parvin, beta	Parvb	3.6	1.09e-07
17389339	ryanodine receptor 3	Ryr3	3.61	8.52e-08
17481087	stromal interaction molecule 1	Stim1	3.62	5.63e-09
17315482	predicted gene 4544	Gm4544	3.63	1.58e-11
17445238	klotho	Kl	3.65	1.59e-07
17409753	amylo-1,6-glucosidase, 4-alpha-glucanotransferase	Agl	3.66	7.41e-08
17501226			3.66	1.84e-07
17541525	olfactory receptor 1321	Olfr1321	3.66	9.52e-07
17461414	basic helix-loop-helix family, member e40	Bhlhe40	3.68	2.91e-08
17477946	MEF2 activating motif and SAP domain containing transcriptional regulator	Mamstr	3.68	6e-06
17503942	metallothionein 1	Mt1	3.68	1e-06
17278838	microRNA 376b	Mir376b	3.69	1.6e-05
17380764	microRNA 133a-2	Mir133a-2	3.69	4e-06
17500996	acyl-CoA synthetase long-chain family member 1	Acsl1	3.69	3.97e-07
17536759	integrin beta 1 binding protein 2	Itgb1bp2	3.69	1.1e-05
17251264	dehydrogenase/reductase (SDR family) member 7C	Dhrs7c	3.7	3.5e-09
17265096	solute carrier family 2 (facilitated glucose transporter), member 4	Slc2a4	3.71	4.63e-08
17548228	CDGSH iron sulfur domain 3B; CDGSH iron sulfur domain 3	Cisd3b	3.73	4.72e-07
17507573	ADP-ribosylhydrolase like 1	Adprhl1	3.74	2e-06
17278690	microRNA 493	Mir493	3.76	8.43e-07
17251133	myosin, heavy polypeptide 8, skeletal muscle, perinatal	Myh8	3.77	7e-06
17257444	angiotensin I converting enzyme (peptidyl-dipeptidase A) 1	Ace	3.8	5.94e-07
17278803	microRNA 379	Mir379	3.8	4.74e-07
17278806	microRNA 411	Mir411	3.8	4e-06
17351811	acetyl-Coenzyme A acyltransferase 2 (mitochondrial 3-oxoacyl-Coenzyme A thiolase)	Acaa2	3.82	2.06e-08
17249980	interferon gamma induced GTPase	Igtp	3.84	0.000191
17268884	nuclear receptor subfamily 1, group D, member 1	Nr1d1	3.84	1.43e-08
17372255	predicted gene 13938 [Source:MGI Symbol;Acc:MGI:3651046]	Gm13938	3.84	8e-06
17259534	solute carrier family 16 (monocarboxylic acid transporters), member 3	Slc16a3	3.86	6.74e-08
17401142			3.86	1.76e-07
17502899	uncoupling protein 1 (mitochondrial, proton carrier)	Ucp1	3.88	0.021909
17316775	actin-binding Rho activating protein	Abra	3.89	1e-06
17397297	RIKEN cDNA 3110057O12 gene	3110057O12Rik	3.9	2.49e-09
17534646	Rho GTPase activating protein 36	Arhgap36	3.9	0.00019
17350921	RIKEN cDNA F830016B08 gene	F830016B08Rik	3.91	3e-06
17222193	ankyrin repeat domain 23	Ankrd23	3.93	2e-06
17548750			3.94	0.000144
17314577	phosphofructokinase, muscle	Pfkm	3.95	2.01e-07
17383633	carnitine acetyltransferase	Crat	3.95	5.96e-09
17516469	ubiquitin specific peptidase 2	Usp2	3.97	3e-06
17231349	protein phosphatase 1, regulatory (inhibitor) subunit 14c	Ppp1r14c	3.98	2.12e-07
17448106	sel-1 suppressor of lin-12-like 3 (C. elegans)	Sel1l3	3.99	6.97e-08
17476456	heat shock protein, alpha-crystallin-related, B6	Hspb6	3.99	1.03e-07
17264792	ATPase, Na+/K+ transporting, beta 2 polypeptide	Atp1b2	4.01	1.7e-08
17352695	microRNA 1a-2	Mir1a-2	4.01	1.8e-05
17499485	myomesin 2	Myom2	4.01	2e-06
17284049	ankyrin repeat domain 9	Ankrd9	4.02	4.1e-09
17233104	blood vessel epicardial substance	Bves	4.03	9.08e-08
17221502	junctophilin 1	Jph1	4.04	2.98e-08
17487242	RIKEN cDNA A930016O22 gene	A930016O22Rik	4.04	4.86e-07
17260261	calcium/calmodulin-dependent protein kinase II, beta	Camk2b	4.05	4.61e-08
17501211			4.05	5.68e-08
17539560	ankyrin repeat and SOCS box-containing 11	Asb11	4.05	2.98e-09
17485246	troponin T3, skeletal, fast	Tnnt3	4.06	3e-06
17406403	family with sequence similarity 160, member A1	Fam160a1	4.07	4.4e-08
17378799	predicted gene 20412 [Source:MGI Symbol;Acc:MGI:5141877]	Gm20412	4.08	3.4e-05
17380757	predicted gene 6307	Gm6307	4.08	5e-06
17270848	sodium channel, voltage-gated, type IV, alpha	Scn4a	4.1	1.58e-08
17451251	myosin XVIIIb	Myo18b	4.1	2.64e-07
17491354	MAS-related GPR, member B1	Mrgprb1	4.1	6.93e-08
17252183	enolase 3, beta muscle	Eno3	4.13	5e-06
17378359	acyl-CoA synthetase short-chain family member 2; predicted gene, 39969	Acss2	4.13	4.94e-12
17463670			4.13	0.000234
17256697	amine oxidase, copper containing 3	Aoc3	4.15	2e-06
17439131	starch binding domain 1	Stbd1	4.15	1e-06
17363559	family with sequence similarity 189, member A2	Fam189a2	4.16	4.01e-09
17461489	caveolin 3	Cav3	4.17	7.3e-05
17517360	sarcolipin	Sln	4.17	1e-05
17532367	hedgehog acyltransferase-like	Hhatl	4.19	5.6e-09
17273253	myeloid-associated differentiation marker-like 2	Myadml2	4.21	4.83e-08
17489420	FXYD domain-containing ion transport regulator 1	Fxyd1	4.21	4.76e-07
17249990	immunity-related GTPase family M member 2	Irgm2	4.27	7.19e-07
17317278	kelch-like 38	Klhl38	4.31	2e-06
17294397	leucine rich repeat containing 14B	Lrrc14b	4.33	7.07e-08
17255987	titin-cap	Tcap	4.34	2.31e-08
17397331	predicted gene, 22043 [Source:MGI Symbol;Acc:MGI:5451820]	Gm22043	4.36	5.69e-08
17238054	NADH dehydrogenase (ubiquinone) 1 alpha subcomplex, 4-like 2	Ndufa4l2	4.39	2.48e-07
17393131	syntrophin, acidic 1	Snta1	4.39	7.1e-09
17414032	muscle-related coiled-coil protein	Murc	4.4	8e-06
17325723	microRNA 568; zinc finger and BTB domain containing 20	Mir568	4.41	7.31e-08
17352036	proline-serine-threonine phosphatase-interacting protein 2	Pstpip2	4.41	1.46e-08
17522536	leucine rich repeat containing 2	Lrrc2	4.41	2.38e-09
17304901	RIKEN cDNA 3425401B19 gene	3425401B19Rik	4.42	9.8e-07
17441453	nitric oxide synthase 1, neuronal	Nos1	4.44	5.58e-12
17451816	heat shock protein 8	Hspb8	4.45	1e-06
17342699	inositol hexaphosphate kinase 3	Ip6k3	4.46	2.16e-08
17244732	myogenic factor 6	Myf6	4.48	2e-05
17298126	leucine-rich repeats and transmembrane domains 1	Lrtm1	4.48	8.9e-10
17279349	adenylosuccinate synthetase like 1	Adssl1	4.49	2.9e-07
17345797	apolipoprotein B mRNA editing enzyme, catalytic polypeptide 2	Apobec2	4.49	4e-05
17408211	phosphodiesterase 4D interacting protein (myomegalin); microRNA 7225	Pde4dip	4.49	1.48e-08
17502951	uncharacterized LOC105246804	LOC105246804	4.49	7.73e-07
17424243	expressed sequence AI464131	AI464131	4.53	4.36e-07
17427746	protein kinase, AMP-activated, alpha 2 catalytic subunit	Prkaa2	4.53	5.94e-08
17346528	complement component 3	C3	4.57	0.001186
17501633	lipoprotein lipase	Lpl	4.58	5.31e-08
17273159	protein phosphatase 1, regulatory subunit 27	Ppp1r27	4.59	5.41e-07
17253258	coronin 6	Coro6	4.61	1.1e-05
17496857	cytochrome c oxidase subunit VIa polypeptide 2	Cox6a2	4.61	4e-06
17293547	fructose bisphosphatase 2	Fbp2	4.65	2.27e-07
17532264	xin actin-binding repeat containing 1	Xirp1	4.67	1e-06
17289132	RIKEN cDNA A630019I02 gene	A630019I02Rik	4.69	3.85e-08
17337228	immediate early response 3	Ier3	4.69	1.5e-08
17456428	leiomodin 2 (cardiac)	Lmod2	4.69	9.29e-07
17313862	peroxisome proliferator activated receptor alpha	Ppara	4.71	5.42e-10
17256870	CD300 antigen like family member G	Cd300lg	4.74	1.31e-07
17229891	ATPase, Na+/K+ transporting, alpha 2 polypeptide	Atp1a2	4.78	2.94e-09
17268120	pyruvate dehydrogenase kinase, isoenzyme 2	Pdk2	4.8	4.22e-09
17282025	spectrin beta, erythrocytic	Sptb	4.8	2.63e-07
17506137	WAP four-disulfide core domain 1	Wfdc1	4.85	1.05e-08
17241553	myopalladin	Mypn	4.87	1e-06
17337852	chloride intracellular channel 5	Clic5	4.9	9.11e-09
17448001	peroxisome proliferative activated receptor, gamma, coactivator 1 alpha	Ppargc1a	4.92	8.4e-11
17334406	ribosomal protein L3-like	Rpl3l	4.98	5.26e-07
17402039	leucine rich repeat containing 39	Lrrc39	4.99	8.92e-08
17415815	phosphoglucomutase 2	Pgm2	5.01	4.13e-09
17350267	myotilin	Myot	5.02	2.99e-07
17484909	patatin-like phospholipase domain containing 2	Pnpla2	5.04	3.2e-05
17305070	LIM domain binding 3	Ldb3	5.16	9e-06
17443342	heat shock protein 1	Hspb1	5.16	1.3e-05
17233095	popeye domain containing 3	Popdc3	5.24	2.13e-07
17265326	predicted gene 12319 [Source:MGI Symbol;Acc:MGI:3649749]	Gm12319	5.24	1.22e-10
17214269	phospholipase C, delta 4	Plcd4	5.28	1.55e-09
17351457	cell death-inducing DNA fragmentation factor, alpha subunit-like effector A	Cidea	5.29	0.000292
17327502	SH3-binding domain glutamic acid-rich protein	Sh3bgr	5.31	2e-06
17352693	microRNA 133a-1	Mir133a-1	5.36	2e-06
17251046	myosin, heavy polypeptide 1, skeletal muscle, adult	Myh1	5.39	5e-06
17314773	RIKEN cDNA 1700120C14 gene	1700120C14Rik	5.42	2e-06
17260192	phosphoglycerate mutase 2	Pgam2	5.43	1e-06
17230408	aarF domain containing kinase 3	Adck3	5.47	9.9e-09
17404091	fatty acid binding protein 4, adipocyte	Fabp4	5.49	2.1e-05
17420874	peptidyl arginine deiminase, type II	Padi2	5.49	2.67e-08
17348902	dystrobrevin alpha	Dtna	5.54	2.01e-09
17409261	synaptophysin-like 2	Sypl2	5.59	3.43e-08
17278692	microRNA 337	Mir337	5.61	7.95e-07
17534337	ATPase, (Na+)/K+ transporting, beta 4 polypeptide	Atp1b4	5.63	1.4e-05
17496211	ATPase, Ca++ transporting, cardiac muscle, fast twitch 1	Atp2a1	5.64	5.44e-07
17276934	tetratricopeptide repeat domain 9	Ttc9	5.7	6.1e-09
17501204			5.73	3.5e-08
17526707	zinc finger and BTB domain containing 16	Zbtb16	5.74	6.41e-10
17393789	transglutaminase 2, C polypeptide	Tgm2	5.76	1.89e-08
17397320	La ribonucleoprotein domain family, member 1B	Larp1b	5.78	2.93e-09
17440826	acetyl-Coenzyme A carboxylase beta	Acacb	5.81	7.6e-10
17310816	carboxymethylenebutenolidase-like (Pseudomonas)	Cmbl	5.84	1.01e-09
17451785	transmembrane protein 233	Tmem233	5.89	7.41e-10
17464943	protein phosphatase 1, regulatory (inhibitor) subunit 3A	Ppp1r3a	6	3.61e-07
17336681	tenascin XB	Tnxb	6.1	5.97e-07
17365803	nebulin-related anchoring protein	Nrap	6.12	4e-06
17356874	muscle glycogen phosphorylase	Pygm	6.16	4e-06
17229121	methyltransferase like 11B	Mettl11b	6.21	1.08e-09
17401126	adenosine monophosphate deaminase 1	Ampd1	6.27	8e-06
17380762	microRNA 1a-1	Mir1a-1	6.29	3e-06
17346125	perilipin 4	Plin4	6.53	5.63e-08
17474631			6.55	0.000246
17232453	triadin	Trdn	6.7	3.42e-07
17448535	Yip1 domain family, member 7	Yipf7	6.77	6.66e-09
17485215	troponin I, skeletal, fast 2	Tnni2	6.77	1.1e-05
17251091	myosin, heavy polypeptide 4, skeletal muscle	Myh4	6.79	1.3e-05
17453140	phosphorylase kinase gamma 1	Phkg1	6.83	1.09e-08
17439094	ADP-ribosyltransferase 3	Art3	6.89	2.21e-10
17406421	family with sequence similarity 160, member A1; ADP-ribosylation factor interacting protein 1	Fam160a1	6.92	6.03e-08
17541528	immunoglobulin superfamily, member 1	Igsf1	6.97	5.77e-11
17492810	fibronectin type III and SPRY domain containing 2	Fsd2	6.98	5.56e-07
17361362	actinin alpha 3	Actn3	7	2.23e-09
17464654	pyruvate dehydrogenase kinase, isoenzyme 4	Pdk4	7.09	1.38e-08
17493685	predicted gene 4980	Gm4980	7.15	3.66e-08
17493432	thyroid hormone responsive	Thrsp	7.16	4.56e-07
17497704	cytochrome c oxidase subunit VIIIb	Cox8b	7.28	9.62e-07
17334666	tryptase beta 2	Tpsb2	7.34	0.000102
17503937	metallothionein 2	Mt2	7.56	5e-06
17318942	parvalbumin	Pvalb	7.82	5.82e-07
17271143	calcium channel, voltage-dependent, gamma subunit 1	Cacng1	7.86	2e-06
17251001	myosin, heavy polypeptide 2, skeletal muscle, adult	Myh2	8.14	9.83e-07
17377816	myosin, light polypeptide kinase 2, skeletal muscle	Mylk2	8.19	9.98e-09
17310637	family with sequence similarity 134, member B	Fam134b	8.34	6.65e-10
17229851	calsequestrin 1	Casq1	8.35	4.14e-07
17400231	tropomodulin 4	Tmod4	8.37	1.02e-09
17396152	carbonic anhydrase 3	Car3	8.69	0.000101
17264330			8.88	1.72e-07
17318083	lymphocyte antigen 6 complex, locus A	Ly6a	8.89	8.2e-05
17421074	heat shock protein family, member 7 (cardiovascular)	Hspb7	9	6e-06
17306147	N-myc downstream regulated gene 2	Ndrg2	9.28	1.3e-10
17387528	smoothelin-like 1	Smtnl1	9.35	7.26e-11
17294959	cardiomyopathy associated 5	Cmya5	10.12	8.51e-10
17212286	solute carrier family 9 (sodium/hydrogen exchanger), member 2	Slc9a2	10.36	2.25e-10
17395766	eukaryotic translation elongation factor 1 alpha 2	Eef1a2	10.4	1.72e-08
17474621	creatine kinase, muscle	Ckm	10.64	1.9e-05
17476288	cytochrome c oxidase subunit VIIa 1	Cox7a1	11.26	7.39e-09
17398139	myeloid leukemia factor 1	Mlf1	11.48	8.65e-10
17320499	choline kinase beta; carnitine palmitoyltransferase 1b, muscle; Chkb-Cpt1b readthrough transcript (NMD candidate)	Chkb	12.55	1.37e-07
17422907	PPARGC1 and ESRR induced regulator, muscle 1	Perm1	12.58	4.35e-10
17501170	ankyrin repeat and SOCs box-containing 5	Asb5	12.76	2.86e-09
17477322	kallikrein 1-related petidase b26	Klk1b26	14.21	1e-06
17306960	mast cell protease 4	Mcpt4	14.75	1e-06
17303874	myozenin 1	Myoz1	15	4e-06
17314888	glycerol-3-phosphate dehydrogenase 1 (soluble)	Gpd1	15.08	3.01e-08
17234436	coiled-coil-helix-coiled-coil-helix domain containing 10	Chchd10	16.52	2.74e-08
17404191			17.06	2.3e-05
17371296	xin actin-binding repeat containing 2	Xirp2	18.08	8.72e-12
17528947	muscular LMNA-interacting protein	Mlip	20.67	1.34e-08
17222707	methyltransferase like 21E	Mettl21e	25.45	5.15e-10
17294816	creatine kinase, mitochondrial 2	Ckmt2	28.21	9.99e-08
17543315	ankyrin repeat and SOCS box-containing 12	Asb12	29.54	7.09e-12
17490245	myosin binding protein C, fast-type	Mybpc2	39.29	2.49e-11

## Sheet: RYR+- E18.5 vs  E14.5
DEGs detected in RYR1+/- E18.5 vs. E14.5
Transcript Cluster ID	Description	Gene Symbol	Fold Change (linear) (hetRYR18.5 vs. hetRYR14.5)	ANOVA p-value (hetRYR18.5 vs. hetRYR14.5)
17494246	hemoglobin Y, beta-like embryonic chain	Hbb-y	-7.22	0.000616
17545629	phosphate regulating endopeptidase homolog, X-linked	Phex	-5.97	0.000772
17470561	ribosomal modification protein rimK-like family member B	Rimklb	-5.92	0.001066
17439367	chemokine (C-X-C motif) ligand 13	Cxcl13	-5.76	0.032018
17398895	cellular retinoic acid binding protein II	Crabp2	-5.33	0.000238
17423395	solute carrier family 26, member 7	Slc26a7	-4.97	0.001703
17416685	predicted gene, 23138 [Source:MGI Symbol;Acc:MGI:5452915]	Gm23138	-4.9	0.015771
17355332	deleted in colorectal carcinoma	Dcc	-4.78	0.001696
17296080	predicted gene, 24431 [Source:MGI Symbol;Acc:MGI:5454208]	Gm24431	-4.69	0.022828
17232215	monooxygenase, DBH-like 1	Moxd1	-4.61	6e-06
17301582	neurofilament, light polypeptide	Nefl	-4.51	0.000195
17546762	midline 1	Mid1	-4.39	0.001343
17310530	cadherin 10	Cdh10	-4.13	0.00574
17277788	fibronectin leucine rich transmembrane protein 2	Flrt2	-4.11	0.004259
17247852	B cell CLL/lymphoma 11A (zinc finger protein)	Bcl11a	-4.1	7.1e-05
17351137	interleukin 17B	Il17b	-4.09	0.000477
17304512	predicted gene, 24916 [Source:MGI Symbol;Acc:MGI:5454693]	Gm24916	-4.03	0.000654
17518318	predicted gene, 22455 [Source:MGI Symbol;Acc:MGI:5452232]	Gm22455	-3.98	0.000141
17224977	delta/notch-like EGF repeat containing	Dner	-3.88	1.5e-05
17330918	activated leukocyte cell adhesion molecule	Alcam	-3.86	0.00023
17397740	mab-21-like 1 (C. elegans)	Mab21l1	-3.86	0.000938
17234030	transmembrane protein 26	Tmem26	-3.84	0.000987
17274394			-3.77	0.005594
17406456	mab-21-like 2 (C. elegans)	Mab21l2	-3.61	0.000301
17491741			-3.57	0.012339
17484710	beta-1,4-N-acetyl-galactosaminyl transferase 4	B4galnt4	-3.53	0.001879
17529307	elongation of very long chain fatty acids (FEN1/Elo2, SUR4/Elo3, yeast)-like 4	Elovl4	-3.53	0.00067
17529481	T-box18	Tbx18	-3.51	0.002353
17441610	T-box 5	Tbx5	-3.49	0.00135
17496947	fibroblast growth factor receptor 2	Fgfr2	-3.48	0.017598
17421432	predicted gene 13251	Gm13251	-3.43	0.006758
17365960	glial cell line derived neurotrophic factor family receptor alpha 1	Gfra1	-3.42	0.000403
17524944	zinc finger protein 599	Zfp599	-3.37	0.002488
17262172	predicted gene, 23039 [Source:MGI Symbol;Acc:MGI:5452816]	Gm23039	-3.33	0.002157
17304514	small nucleolar RNA, C/D box 19	Snord19	-3.33	0.002553
17547813			-3.33	0.004491
17286641	desmoplakin	Dsp	-3.3	0.029803
17412296	Eph receptor A7	Epha7	-3.3	0.000406
17541343	SWI/SNF related, matrix associated, actin dependent regulator of chromatin, subfamily a, member 1; predicted gene, 38682	Smarca1	-3.3	0.004186
17326756	neural cell adhesion molecule 2	Ncam2	-3.28	0.001662
17354906	piezo-type mechanosensitive ion channel component 2	Piezo2	-3.26	0.000545
17430645	Na+/K+ transporting ATPase interacting 1	Nkain1	-3.23	0.001718
17545199	leucine-rich repeats and calponin homology (CH) domain containing 2	Lrch2	-3.21	0.001677
17387502	nuclear encoded rRNA 5S 200 [Source:MGI Symbol;Acc:MGI:4422065]	n-R5s200	-3.2	0.008838
17411262	ST6 (alpha-N-acetyl-neuraminyl-2,3-beta-galactosyl-1,3)-N-acetylgalactosaminide alpha-2,6-sialyltransferase 3	St6galnac3	-3.19	0.000814
17518780	carbonic anyhydrase 12	Car12	-3.18	0.00055
17213315	NOP58 ribonucleoprotein	Nop58	-3.17	0.003876
17388284	midkine	Mdk	-3.16	0.000212
17355565	solute carrier family 14 (urea transporter), member 1	Slc14a1	-3.15	0.001676
17331380	Eph receptor A3	Epha3	-3.14	0.001566
17326702	microRNA let7c-1	Mirlet7c-1	-3.13	0.001535
17374045			-3.12	0.006345
17316390	ribosomal protein L30	Rpl30	-3.11	0.000173
17328610	RIKEN cDNA 2610318N02 gene	2610318N02Rik	-3.1	2.1e-05
17402402	translocation associated membrane protein 1-like 1	Tram1l1	-3.1	0.002116
17486449	zinc finger protein interacting with K protein 1	Zik1	-3.1	0.001153
17505124	cadherin 3	Cdh3	-3.1	0.000227
17331401	predicted gene, 22769 [Source:MGI Symbol;Acc:MGI:5452546]	Gm22769	-3.09	0.004455
17544691	brain expressed X-linked 2	Bex2	-3.09	0.002038
17426434	bone morphogenic protein/retinoic acid inducible neural specific 1	Brinp1	-3.08	0.00328
17349549	microRNA 1949	Mir1949	-3.07	0.00243
17402698	dickkopf homolog 2 (Xenopus laevis)	Dkk2	-3.07	0.000915
17245059	leucine rich repeat containing G protein coupled receptor 5	Lgr5	-3.05	0.000976
17548053			-3.05	0.003013
17520034	protease, serine 35	Prss35	-3.04	4.4e-05
17457381	tetratricopeptide repeat domain 26	Ttc26	-3.03	0.001395
17364597	tolloid-like 2	Tll2	-3	0.000289
17392255	fibronectin leucine rich transmembrane protein 3	Flrt3	-3	0.004118
17491636	small nucleolar RNA host gene 14	Snhg14	-2.99	0.002386
17235831	predicted gene 4767; predicted gene 10778	Gm4767	-2.98	0.004313
17288035	predicted gene 3325	Gm3325	-2.97	0.012229
17403969	RIKEN cDNA 2700069I18 gene	2700069I18Rik	-2.96	0.007658
17546234	vesicle-associated membrane protein 7	Vamp7	-2.96	0.004099
17364917	heparanase 2	Hpse2	-2.95	0.000189
17437302	slit homolog 2 (Drosophila)	Slit2	-2.95	6.1e-05
17428659	nuclear autoantigenic sperm protein (histone-binding)	Nasp	-2.93	0.003278
17512153	cadherin 11	Cdh11	-2.93	0.000861
17333966	zinc finger protein 760	Zfp760	-2.91	0.004397
17406165	glycine receptor, beta subunit	Glrb	-2.91	0.001915
17534673	serine/threonine kinase 26	Stk26	-2.91	0.001566
17502789	glycophorin A	Gypa	-2.89	0.000554
17261710	spindle apparatus coiled-coil protein 1	Spdl1	-2.88	0.000295
17413078	predicted gene 13304; predicted gene 10591; predicted gene, 21541; chemokine (C-C motif) ligand 21B (leucine); chemokine (C-C motif) ligand 21C (leucine)	Gm13304	-2.88	0.03286
17434230	predicted gene 13304; predicted gene 10591; predicted gene, 21541; chemokine (C-C motif) ligand 21B (leucine); chemokine (C-C motif) ligand 21C (leucine)	Gm13304	-2.88	0.03286
17434742	sema domain, immunoglobulin domain (Ig), short basic domain, secreted, (semaphorin) 3D	Sema3d	-2.88	0.000369
17478476	growth arrest specific 2	Gas2	-2.88	0.000537
17515950	cell adhesion molecule-related/down-regulated by oncogenes	Cdon	-2.88	0.000489
17326964	hormonally upregulated Neu-associated kinase	Hunk	-2.87	0.002003
17537271	zinc finger protein 711	Zfp711	-2.87	0.00104
17397377	protocadherin 10	Pcdh10	-2.86	0.001178
17421476	predicted gene 13139	Gm13139	-2.86	0.008998
17550390			-2.86	0.000711
17261840	hyaluronan mediated motility receptor (RHAMM)	Hmmr	-2.85	0.000366
17337497	zinc finger protein 57	Zfp57	-2.85	1.9e-05
17398557	secreted frizzled-related protein 2	Sfrp2	-2.85	0.000797
17534706	PHD finger protein 6	Phf6	-2.84	0.00185
17437350	predicted gene 20475 [Source:MGI Symbol;Acc:MGI:5141940]	Gm20475	-2.83	0.000121
17518314	predicted gene, 22571 [Source:MGI Symbol;Acc:MGI:5452348]	Gm22571	-2.83	0.003524
17546055	EGF-like-domain, multiple 6	Egfl6	-2.83	0.002681
17319887	signal peptide, CUB domain, EGF-like 1	Scube1	-2.82	0.009327
17507288	Shc SH2-domain binding protein 1	Shcbp1	-2.82	0.001946
17268255	insulin-like growth factor 2 mRNA binding protein 1; microRNA 3063	Igf2bp1	-2.8	0.001637
17350552	proline rich 16	Prr16	-2.8	0.001081
17324402	predicted gene, 24616 [Source:MGI Symbol;Acc:MGI:5454393]	Gm24616	-2.79	0.001055
17445507	DBF4 homolog (S. cerevisiae)	Dbf4	-2.79	0.00095
17283871	B cell leukemia/lymphoma 11B	Bcl11b	-2.78	0.003236
17289029	predicted gene, 24507 [Source:MGI Symbol;Acc:MGI:5454284]	Gm24507	-2.78	0.03384
17309154	potassium channel tetramerisation domain containing 12	Kctd12	-2.78	0.000701
17458734	pleckstrin homology domain containing, family A (phosphoinositide binding specific) member 8	Plekha8	-2.78	0.003037
17535245	AF4/FMR2 family, member 2	Aff2	-2.78	0.00376
17405075	protocadherin 18	Pcdh18	-2.77	0.000317
17287336	predicted gene, 22806 [Source:MGI Symbol;Acc:MGI:5452583]	Gm22806	-2.76	0.001247
17290447	cholinergic receptor, muscarinic 3, cardiac	Chrm3	-2.76	0.001736
17538405			-2.76	0.000558
17239751	small nucleolar RNA, H/ACA box 33	Snora33	-2.75	0.001958
17307738	frizzled homolog 3 (Drosophila)	Fzd3	-2.75	0.002853
17376508	microRNA 103-2	Mir103-2	-2.75	0.006194
17397990	membrane metallo endopeptidase	Mme	-2.75	0.007824
17414017	transmembrane protein with EGF-like and two follistatin-like domains 1	Tmeff1	-2.75	0.00209
17224661	Eph receptor A4	Epha4	-2.74	0.003141
17230256	adenylosuccinate synthetase, non muscle	Adss	-2.74	0.006091
17292327	microRNA let7f-1	Mirlet7f-1	-2.74	0.013028
17365625	sortilin-related VPS10 domain containing receptor 1	Sorcs1	-2.74	0.020496
17288992	EGF-like repeats and discoidin I-like domains 3; predicted gene, 38504	Edil3	-2.73	0.022824
17289584	centromere protein K	Cenpk	-2.73	0.003512
17377459	predicted gene 10130 [Source:MGI Symbol;Acc:MGI:3642547]	Gm10130	-2.73	0.001149
17456308	potassium voltage-gated channel, Shal-related family, member 2	Kcnd2	-2.73	0.00454
17360863	RIKEN cDNA E330013P04 gene	E330013P04Rik	-2.72	0.002762
17402386	protease, serine 12 neurotrypsin (motopsin)	Prss12	-2.72	0.001047
17403185	unc-5 homolog C (C. elegans)	Unc5c	-2.72	0.013831
17394538	sulfatase 2	Sulf2	-2.7	0.000894
17265470	RIKEN cDNA 6330403K07 gene	6330403K07Rik	-2.69	0.001434
17295745	centromere protein H	Cenph	-2.69	0.00041
17549906			-2.69	0.004738
17358838	kinesin family member 20B	Kif20b	-2.68	0.00672
17416687	predicted gene 12737 [Source:MGI Symbol;Acc:MGI:3651021]	Gm12737	-2.68	0.008456
17448595	gamma-aminobutyric acid (GABA) A receptor, subunit alpha 4	Gabra4	-2.68	0.01161
17245422	high mobility group AT-hook 2	Hmga2	-2.67	0.011387
17252847	predicted gene, 22771 [Source:MGI Symbol;Acc:MGI:5452548]	Gm22771	-2.67	0.003563
17459207	neuron-derived neurotrophic factor	Ndnf	-2.67	0.008734
17239435	adhesion G protein-coupled receptor G6	Adgrg6	-2.66	0.000177
17256225	cell division cycle 6	Cdc6	-2.66	0.000976
17378741	neuronatin	Nnat	-2.66	0.001517
17525503	checkpoint kinase 1	Chek1	-2.66	0.002363
17239755	predicted gene, 23130 [Source:MGI Symbol;Acc:MGI:5452907]	Gm23130	-2.65	6.9e-05
17366121	predicted gene, 26158 [Source:MGI Symbol;Acc:MGI:5455935]	Gm26158	-2.65	0.017224
17389467	gremlin 1	Grem1	-2.65	0.000235
17511377	neuropilin (NRP) and tolloid (TLL)-like 2	Neto2	-2.65	0.001843
17547825	deleted in lymphocytic leukemia, 2 [Source:MGI Symbol;Acc:MGI:1934030]	Dleu2	-2.65	0.01339
17371374	ceramide synthase 6	Cers6	-2.64	0.002864
17343559	zinc finger protein 81	Zfp81	-2.63	0.000264
17425525	ferric-chelate reductase 1 like	Frrs1l	-2.62	5.7e-05
17547684			-2.62	0.008705
17274412			-2.61	0.00408
17409963	formin binding protein 1-like	Fnbp1l	-2.61	0.001523
17426956	HAUS augmin-like complex, subunit 6	Haus6	-2.61	0.001089
17538395	zinc finger, CCHC domain containing 16	Zcchc16	-2.61	0.009576
17374058	kinesin family member 18A	Kif18a	-2.6	6.4e-05
17391623	carboxypeptidase X 1 (M14 family)	Cpxm1	-2.6	0.004198
17397268	polo-like kinase 4	Plk4	-2.6	0.002292
17249461	follistatin-like 4	Fstl4	-2.59	9e-05
17511550	TOX high mobility group box family member 3	Tox3	-2.59	0.008159
17326081	RIKEN cDNA C330027C09 gene	C330027C09Rik	-2.58	0.002089
17362521	RIKEN cDNA 5730408K05 gene; microRNA 5136	5730408K05Rik	-2.58	0.000652
17254670	spindle and kinetochore associated complex subunit 2	Ska2	-2.57	0.000486
17309482	UDP-glucose glycoprotein glucosyltransferase 2	Uggt2	-2.57	0.000496
17352884	cadherin 2	Cdh2	-2.57	0.002011
17434285	predicted gene 1987; chemokine (C-C motif) ligand 21A (serine)	Gm1987	-2.57	0.035338
17528963	leucine rich repeat containing 1	Lrrc1	-2.57	0.000435
17550494			-2.57	0.003505
17280184	zinc finger protein 125	Zfp125	-2.56	0.0076
17316793	R-spondin 2	Rspo2	-2.56	0.000626
17340397	predicted gene 6741 [Source:MGI Symbol;Acc:MGI:3643504]	Gm6741	-2.56	0.02999
17405789	tripartite motif-containing 59	Trim59	-2.56	0.005135
17465856	pleiotrophin	Ptn	-2.56	0.00234
17218653	growth arrest specific 5	Gas5	-2.55	0.000662
17278998			-2.55	0.003901
17398115	pentraxin related gene	Ptx3	-2.55	0.002346
17442765	transmembrane protein 132C	Tmem132c	-2.55	0.004696
17545121	doublecortin	Dcx	-2.55	0.006558
17346637	ephrin A5	Efna5	-2.54	0.001985
17396106	leucine rich repeat and coiled-coil domain containing 1	Lrrcc1	-2.54	0.001463
17405724	short stature homeobox 2	Shox2	-2.54	0.003216
17465080	aminoadipate-semialdehyde synthase	Aass	-2.54	0.00179
17523186	predicted gene, 24044 [Source:MGI Symbol;Acc:MGI:5453821]	Gm24044	-2.54	0.000788
17532755	diacylglycerol kinase kappa	Dgkk	-2.54	0.000257
17550560			-2.54	0.031083
17341595	kringle containing transmembrane protein 2	Kremen2	-2.53	0.000801
17463509	C-type lectin domain family 12, member a	Clec12a	-2.53	0.021158
17464008			-2.53	0.023591
17334126	serine/arginine repetitive matrix 2; RIKEN cDNA D930048G16 gene	Srrm2	-2.52	0.006055
17339991	echinoderm microtubule associated protein like 4	Eml4	-2.52	0.000489
17550454			-2.52	0.00463
17238210	DNA primase, p49 subunit	Prim1	-2.51	0.000388
17300686	NYN domain and retroviral integrase containing	Nynrin	-2.51	0.002306
17353520	cell division cycle 25C	Cdc25c	-2.51	0.002772
17532645	mitochondrially encoded tRNA tyrosine [Source:MGI Symbol;Acc:MGI:102470]	mt-Ty	-2.51	0.045444
17539586	Fanconi anemia, complementation group B	Fancb	-2.51	0.006767
17359212	helicase, lymphoid specific	Hells	-2.5	0.012975
17401563	solute carrier family 16 (monocarboxylic acid transporters), member 4	Slc16a4	-2.5	0.01614
17470597	solute carrier family 2 (facilitated glucose transporter), member 3	Slc2a3	-2.5	3.3e-05
17493358	DNA damage-induced apoptosis suppressor	Ddias	-2.5	0.000352
17219848	exonuclease 1	Exo1	-2.49	0.000906
17262394	zinc finger protein 354C	Zfp354c	-2.49	0.000647
17302362	bora, aurora kinase A activator	Bora	-2.49	0.000101
17412965	predicted gene 13304; predicted gene 10591; predicted gene, 21541; chemokine (C-C motif) ligand 21B (leucine); chemokine (C-C motif) ligand 21C (leucine)	Gm13304	-2.49	0.029846
17413025	predicted gene 13304; predicted gene 10591; predicted gene, 21541; chemokine (C-C motif) ligand 21B (leucine); chemokine (C-C motif) ligand 21C (leucine)	Gm13304	-2.49	0.029846
17413123	predicted gene 13304; predicted gene 10591; predicted gene, 21541; chemokine (C-C motif) ligand 21B (leucine); chemokine (C-C motif) ligand 21C (leucine)	Gm13304	-2.49	0.029846
17434150	predicted gene 13304; predicted gene 10591; predicted gene, 21541; chemokine (C-C motif) ligand 21B (leucine); chemokine (C-C motif) ligand 21C (leucine)	Gm13304	-2.49	0.029846
17281506	polymerase (DNA directed), epsilon 2 (p59 subunit)	Pole2	-2.48	0.002102
17352265	cerebellin 2 precursor protein	Cbln2	-2.48	0.004034
17507857			-2.48	0.010879
17274346	RIKEN cDNA 5730507C01 gene	5730507C01Rik	-2.47	0.000819
17281428	MIS18 binding protein 1	Mis18bp1	-2.47	0.001233
17289602	a disintegrin-like and metallopeptidase (reprolysin type) with thrombospondin type 1 motif, 6	Adamts6	-2.47	0.000375
17323828	UDP-GlcNAc:betaGal beta-1,3-N-acetylglucosaminyltransferase 5	B3gnt5	-2.47	0.002954
17332891	nuclear encoded rRNA 5S 26 [Source:MGI Symbol;Acc:MGI:4421871]	n-R5s26	-2.47	0.000809
17461448	glutamate receptor, metabotropic 7	Grm7	-2.47	0.002128
17402052	spindle assembly 6 homolog (C. elegans)	Sass6	-2.46	0.001301
17464672	solute carrier family 25 (mitochondrial carrier, adenine nucleotide translocator), member 13	Slc25a13	-2.46	0.004107
17350740	lamin B1	Lmnb1	-2.45	0.000204
17373857	cleavage stimulation factor, 3 pre-RNA, subunit 3	Cstf3	-2.45	0.00148
17391376	budding uninhibited by benzimidazoles 1 homolog (S. cerevisiae)	Bub1	-2.45	0.002744
17211198	sulfatase 1	Sulf1	-2.44	0.001925
17366778	predicted gene, 24761 [Source:MGI Symbol;Acc:MGI:5454538]	Gm24761	-2.44	3.8e-05
17434764	sema domain, immunoglobulin domain (Ig), short basic domain, secreted, (semaphorin) 3A	Sema3a	-2.44	0.001283
17438530	adhesion G protein-coupled receptor L3	Adgrl3	-2.44	0.002431
17525224	a disintegrin-like and metallopeptidase (reprolysin type) with thrombospondin type 1 motif, 15	Adamts15	-2.44	0.00226
17543870	zinc finger, DHHC domain containing 15	Zdhhc15	-2.44	0.0019
17544196	highly divergent homeobox	Hdx	-2.44	0.007516
17245272	nucleoporin 107	Nup107	-2.43	0.002503
17326685	Mir99a and Mirlet7c-1 host gene (non-protein coding); predicted gene, 31322	Mir99ahg	-2.43	0.002402
17530311	transmembrane protein 108	Tmem108	-2.43	0.001983
17544385	tetraspanin 6	Tspan6	-2.43	4.5e-05
17288521	telomerase reverse transcriptase	Tert	-2.42	0.000737
17299185	G protein-coupled receptor 137C	Gpr137c	-2.42	0.006268
17352517	mohawk homeobox	Mkx	-2.42	0.000442
17501041	caspase 3	Casp3	-2.42	0.00247
17502583	minichromosome maintenance deficient 5, cell division cycle 46 (S. cerevisiae)	Mcm5	-2.42	0.00108
17527934	kinesin family member 23	Kif23	-2.42	0.001709
17266370	small nucleolar RNA, C/D box 4A	Snord4a	-2.41	0.000189
17348879	additional sex combs like 3 (Drosophila)	Asxl3	-2.41	0.005366
17432418	predicted gene 13052 [Source:MGI Symbol;Acc:MGI:3651990]	Gm13052	-2.41	0.019331
17548178	small nuclear ribonucleoprotein Sm D1-like; predicted gene 14277 [Source:MGI Symbol;Acc:MGI:3650350]	LOC105244345	-2.41	0.010589
17274540	ribonucleotide reductase M2	Rrm2	-2.4	0.002714
17315860	solute carrier family 1 (glial high affinity glutamate transporter), member 3	Slc1a3	-2.4	0.019765
17323198	EF hand calcium binding domain 1	Efcab1	-2.4	0.017376
17339729	latent transforming growth factor beta binding protein 1	Ltbp1	-2.4	0.000545
17344120	small nucleolar RNA, C/D box 52	Snord52	-2.4	0.01276
17370478	predicted gene, 36800	Gm36800	-2.4	0.002665
17372307	integrin alpha 4	Itga4	-2.4	0.000642
17231844	PERP, TP53 apoptosis effector	Perp	-2.39	0.040772
17280292	predicted gene 9312 [Source:MGI Symbol;Acc:MGI:3647775]	Gm9312	-2.39	0.000381
17545150	lipoma HMGIC fusion partner-like 1	Lhfpl1	-2.39	0.001983
17288051	zinc finger protein 80	Zfp808	-2.38	0.000774
17341378	zinc finger protein 942	Zfp942	-2.38	0.00525
17370485	microRNA 181b-2	Mir181b-2	-2.38	0.001103
17376677	bone morphogenetic protein 2	Bmp2	-2.38	0.003336
17402797	centromere protein E	Cenpe	-2.38	0.001596
17406241	RNA binding motif protein 46	Rbm46	-2.38	0.001871
17466532	protein disulfide isomerase associated 4; microRNA 704	Pdia4	-2.38	0.000376
17518331	timeless interacting protein	Tipin	-2.38	0.000127
17523494	kinesin family member 15	Kif15	-2.38	0.000171
17233347	gap junction protein, alpha 1	Gja1	-2.37	7.7e-05
17266563	WD repeat and SOCS box-containing 1	Wsb1	-2.37	0.001767
17291183	histone cluster 1, H3e	Hist1h3e	-2.37	0.000958
17294302	thyroid hormone receptor interactor 13	Trip13	-2.37	0.000212
17315878	S-phase kinase-associated protein 2 (p45)	Skp2	-2.37	0.000205
17466932	TLR4 interactor with leucine-rich repeats	Tril	-2.37	0.000861
17541190	cullin 4B	Cul4b	-2.37	0.001413
17287325	sphingosine-1-phosphate receptor 3	S1pr3	-2.36	0.002617
17333686	limb expression 1 homolog (chicken)	Lix1	-2.36	0.001069
17244973	TRH-degrading enzyme	Trhde	-2.35	0.003566
17347493	serine/arginine-rich splicing factor 7	Srsf7	-2.35	0.000581
17348276	frizzled homolog 8 (Drosophila)	Fzd8	-2.35	0.00066
17384787	suppressor of cancer cell invasion	Scai	-2.35	0.000468
17412013	matrix metallopeptidase 16	Mmp16	-2.35	0.000386
17424461	predicted gene 1987; chemokine (C-C motif) ligand 21A (serine)	Gm1987	-2.35	0.035247
17434105	C-C motif chemokine 21c; chemokine (C-C motif) ligand 21C (leucine) [Source:MGI Symbol;Acc:MGI:1891386]; predicted gene 10591 [Source:MGI Symbol;Acc:MGI:3711256]; chemokine (C-C motif) ligand 21B (leucine) [Source:MGI Symbol;Acc:MGI:1349182]	LOC100041504	-2.35	0.02926
17504649	core binding factor beta	Cbfb	-2.35	0.002149
17528137	zwilch kinetochore protein	Zwilch	-2.35	0.003798
17528750	testis expressed gene 9	Tex9	-2.35	0.001274
17529930	calsyntenin 2	Clstn2	-2.35	0.00663
17545135	transient receptor potential cation channel, subfamily C, member 5	Trpc5	-2.35	0.002816
17307203	spindle and kinetochore associated complex subunit 3	Ska3	-2.34	0.000298
17330391	protein O-glucosyltransferase 1	Poglut1	-2.34	0.00191
17355304	RIKEN cDNA 4930503L19 gene	4930503L19Rik	-2.34	0.00115
17546745			-2.34	0.010522
17229128	cDNA sequence BC055324	BC055324	-2.33	0.000546
17241510	small nucleolar RNA, C/D box 98 [Source:MGI Symbol;Acc:MGI:3819569]	Snord98	-2.33	0.025617
17261550	nucleophosmin 1	Npm1	-2.33	0.013708
17293534	pluripotency associated transcript 25	Platr25	-2.33	9.6e-05
17430824	small nucleolar RNA host gene 3	Snhg3	-2.33	0.000714
17437278	non-SMC condensin I complex, subunit G	Ncapg	-2.33	0.002785
17479834	mex3 homolog B (C. elegans)	Mex3b	-2.33	4.8e-05
17504321	GINS complex subunit 3 (Psf3 homolog)	Gins3	-2.33	0.001257
17548979	predicted gene 4322 [Source:MGI Symbol;Acc:MGI:3782503]	Gm4322	-2.33	4e-06
17302640	Mir17 host gene (non-protein coding); microRNA 19b-1; microRNA 92-1	Mir17hg	-2.32	0.000322
17453776	collagen, type XXVI, alpha 1	Col26a1	-2.32	0.000231
17505913	centromere protein N	Cenpn	-2.32	0.003225
17519888	interleukin-1 receptor-associated kinase 1 binding protein 1	Irak1bp1	-2.32	0.00549
17523898	RIKEN cDNA 9230110C19 gene	9230110C19Rik	-2.32	0.000804
17543840	expressed sequence C77370	C77370	-2.32	0.002934
17359767	predicted gene, 25482 [Source:MGI Symbol;Acc:MGI:5455259]	Gm25482	-2.31	0.016407
17537648	centromere protein I	Cenpi	-2.31	0.004961
17285834	histone cluster 1, H2bg	Hist1h2bg	-2.3	0.000978
17315993	retinoic acid induced 14	Rai14	-2.3	0.000781
17366746	microRNA 669k	Mir669k	-2.3	0.000624
17398416	platelet-derived growth factor, C polypeptide	Pdgfc	-2.3	0.000751
17403895	leucine rich repeat containing 40	Lrrc40	-2.3	0.001901
17419940	serine/arginine-rich splicing factor 10	Srsf10	-2.3	0.015431
17541618	muscleblind-like 3 (Drosophila)	Mbnl3	-2.3	0.00023
17282139	phosphatidylinositol glycan anchor biosynthesis, class H; RIKEN cDNA 9230116L04 gene	Pigh	-2.29	0.001497
17447835	prominin 1	Prom1	-2.29	0.003012
17541008	small nucleolar RNA, H/ACA box 69	Snora69	-2.29	0.01009
17274492	predicted gene, 22908 [Source:MGI Symbol;Acc:MGI:5452685]	Gm22908	-2.28	0.021344
17274494	predicted gene, 26140 [Source:MGI Symbol;Acc:MGI:5455917]	Gm26140	-2.28	0.021344
17317115	defective in sister chromatid cohesion 1 homolog (S. cerevisiae)	Dscc1	-2.28	0.001272
17376274	NOP56 ribonucleoprotein	Nop56	-2.28	0.00098
17477016	predicted gene, 23256 [Source:MGI Symbol;Acc:MGI:5453033]	Gm23256	-2.28	0.021344
17490038	predicted gene 5593	Gm5593	-2.28	0.000506
17518636	RIKEN cDNA 2810417H13 gene	2810417H13Rik	-2.28	2e-06
17219997	kinesin family member 26B	Kif26b	-2.27	0.010394
17279980	visinin-like 1	Vsnl1	-2.27	0.020177
17357126	small nucleolar RNA host gene 1	Snhg1	-2.27	0.000137
17380464	predicted gene 14296; predicted gene 2210418O10Rik	Gm14296	-2.27	0.013671
17405247	exosome component 8	Exosc8	-2.27	0.000311
17414651	zinc finger protein 618	Zfp618	-2.27	0.00061
17478406	NEL-like 1	Nell1	-2.27	0.000283
17237252	nucleosome assembly protein 1-like 1; nucleosome assembly protein 1-like 1 pseudogene	Nap1l1	-2.26	0.001908
17274401	RIKEN cDNA 6030426L16 gene	6030426L16Rik	-2.26	0.001174
17311602	Mdm2, transformed 3T3 cell double minute p53 binding protein	Mtbp	-2.26	0.00396
17341455	zinc finger protein 40	Zfp40	-2.26	0.038393
17444792	ribosomal protein L21	Rpl21	-2.26	0.005336
17448614	corin	Corin	-2.26	0.003185
17519910	Ttk protein kinase	Ttk	-2.26	0.000172
17275332	G2/M-phase specific E3 ubiquitin ligase	G2e3	-2.25	0.010675
17295346	UTP15, U3 small nucleolar ribonucleoprotein, homolog (yeast)	Utp15	-2.25	0.000536
17300893	intraflagellar transport 88	Ift88	-2.25	0.000604
17389608	Meis homeobox 2	Meis2	-2.25	0.003439
17412237	MMS22-like, DNA repair protein	Mms22l	-2.25	0.001333
17537306	kelch-like 4	Klhl4	-2.25	0.007753
17232082	retinoic acid early transcript delta; retinoic acid early transcript 1E; retinoic acid early transcript beta	Raet1d	-2.24	6.3e-05
17305757	WD repeat and HMG-box DNA binding protein 1	Wdhd1	-2.24	0.003281
17309013	protocadherin 9	Pcdh9	-2.24	0.005182
17329380	replication factor C (activator 1) 4	Rfc4	-2.24	0.000775
17354244	coiled-coil domain containing 112	Ccdc112	-2.24	0.00079
17381225	suppressor of variegation 3-9 homolog 2 (Drosophila)	Suv39h2	-2.24	0.000368
17482093			-2.24	0.001276
17510701	RNA binding motif protein, X-linked like-1	Rbmxl1	-2.24	0.000617
17523095	endo/exonuclease (5-3), endonuclease G-like	Exog	-2.24	0.000144
17291525	SRY (sex determining region Y)-box 4	Sox4	-2.23	0.000475
17295944	peptidylprolyl isomerase domain and WD repeat containing 1	Ppwd1	-2.23	0.003368
17327331	chromatin assembly factor 1, subunit B (p60)	Chaf1b	-2.23	9.9e-05
17328432	minichromosome maintenance deficient 4 homolog (S. cerevisiae)	Mcm4	-2.23	0.0012
17342101	hematological and neurological expressed 1-like	Hn1l	-2.23	0.001226
17350356	eukaryotic translation initiation factor 1A	Eif1a	-2.23	0.00582
17389481	Rho GTPase activating protein 11A	Arhgap11a	-2.23	0.005238
17451186	myocardial infarction associated transcript (non-protein coding)	Miat	-2.23	0.000266
17466878	homeobox A10	Hoxa10	-2.23	0.000458
17505790	contactin associated protein-like 4	Cntnap4	-2.23	0.003288
17248255	hemoglobin X, alpha-like embryonic chain in Hba complex	Hba-x	-2.22	0.005032
17292967	paired-like homeodomain transcription factor 1	Pitx1	-2.22	0.000849
17298731	growth differentiation factor 10	Gdf10	-2.22	0.016339
17347042	NDC80 homolog, kinetochore complex component (S. cerevisiae)	Ndc80	-2.22	0.000243
17421394	SWI/SNF related, matrix associated, actin dependent regulator of chromatin, subfamily a, member 5 pseudogene	Gm13034	-2.22	0.005008
17508766	exoribonuclease 1	Eri1	-2.22	0.007139
17348850	ring finger protein 138	Rnf138	-2.21	0.010861
17363663	small nucleolar RNA, H/ACA box 19; microRNA 3084-1; predicted gene, 38437	Snora19	-2.21	0.001092
17366118	small nucleolar RNA, H/ACA box 19; microRNA 3084-1; predicted gene, 38437	Snora19	-2.21	0.001092
17393562	predicted gene 14230	Gm14230	-2.21	0.004328
17444802	ribosomal protein L21	Rpl21	-2.21	0.001067
17479758	SH3-domain GRB2-like 3	Sh3gl3	-2.21	0.005935
17492619	Bloom syndrome, RecQ helicase-like	Blm	-2.21	0.002869
17499849	asparagine-linked glycosylation 11 (alpha-1,2-mannosyltransferase)	Alg11	-2.21	0.003616
17348274	putative E3 ubiquitin-protein ligase UNKL pseudogene; predicted gene 5819 [Source:MGI Symbol;Acc:MGI:3643122]	LOC101055995	-2.2	0.013159
17405764	intraflagellar transport 80	Ift80	-2.2	0.002306
17412123	cyclin C	Ccnc	-2.2	0.010046
17454310	glypican 2 (cerebroglycan)	Gpc2	-2.2	0.000599
17519155	meiosis-specific nuclear structural protein 1	Mns1	-2.2	0.000385
17540366	predicted gene, 25552 [Source:MGI Symbol;Acc:MGI:5455329]	Gm25552	-2.2	0.019325
17547744	CDC28 protein kinase regulatory subunit 2	Cks2	-2.2	0.000647
17548303	predicted gene 12891 [Source:MGI Symbol;Acc:MGI:3649646]	Gm12891	-2.2	0.000647
17548434			-2.2	0.001579
17548955	CDC28 protein kinase regulatory subunit 2	Cks2	-2.2	0.000647
17222001	DNA primase, p58 subunit	Prim2	-2.19	0.000322
17268909	topoisomerase (DNA) II alpha	Top2a	-2.19	0.001246
17293521	pluripotency associated transcript 25	Platr25	-2.19	0.002598
17309368	SLIT and NTRK-like family, member 6	Slitrk6	-2.19	0.005652
17341758	netrin 3	Ntn3	-2.19	0.004665
17416955	BEN domain containing 5	Bend5	-2.19	0.000203
17451930	expressed sequence AW549542	AW549542	-2.19	0.004808
17476916	V-set and transmembrane domain containing 2B	Vstm2b	-2.19	0.001269
17523861	baculoviral IAP repeat-containing 2	Birc2	-2.19	0.000911
17235243	ephrin A2	Efna2	-2.18	8.2e-05
17294734	predicted gene, 22574 [Source:MGI Symbol;Acc:MGI:5452351]	Gm22574	-2.18	0.00819
17295757	cyclin B1	Ccnb1	-2.18	0.003351
17309457	DAZ interacting protein 1	Dzip1	-2.18	0.000843
17389920	Opa interacting protein 5	Oip5	-2.18	0.001714
17404402	ect2 oncogene	Ect2	-2.18	0.001788
17407001	ephrin A3	Efna3	-2.18	0.008491
17421491	predicted gene 13152	Gm13152	-2.18	0.005806
17425855	INTS3 and NABP interacting protein	Inip	-2.18	0.000314
17225893	diphosphoinositol pentakisphosphate kinase 2	Ppip5k2	-2.17	0.005588
17296483	predicted gene 16263	Gm16263	-2.17	0.010113
17371941	cell division cycle associated 7	Cdca7	-2.17	0.002588
17412593	serine/arginine-rich splicing factor 12	Srsf12	-2.17	3.5e-05
17414114	structural maintenance of chromosomes 2	Smc2	-2.17	0.003903
17466507	enhancer of zeste 2 polycomb repressive complex 2 subunit	Ezh2	-2.17	0.000543
17469463	RING1 and YY1 binding protein	Rybp	-2.17	0.000344
17482160	centriolar coiled coil protein 110	Ccp110	-2.17	0.000754
17501292	high mobility group box 2	Hmgb2	-2.17	0.000467
17505863	vesicle amine transport protein 1 homolog-like (T. californica)	Vat1l	-2.17	0.004412
17537190	SH3-binding domain glutamic acid-rich protein like	Sh3bgrl	-2.17	0.002669
17237608	glutamate receptor interacting protein 1	Grip1	-2.16	0.00037
17275832	Fanconi anemia, complementation group M	Fancm	-2.16	0.000239
17278470	vaccinia related kinase 1	Vrk1	-2.16	0.005058
17324396	eukaryotic translation initiation factor 4A2	Eif4a2	-2.16	0.003901
17330486	queuine tRNA-ribosyltransferase domain containing 1	Qtrtd1	-2.16	0.000511
17348295	THO complex 1	Thoc1	-2.16	0.000489
17508609	neuregulin 1	Nrg1	-2.16	7.3e-05
17514824	TATA box binding protein (Tbp)-associated factor, RNA polymerase I, D	Taf1d	-2.16	0.006076
17525007	dpy-19-like 1 (C. elegans)	Dpy19l1	-2.16	0.001971
17529383	phosphoglucomutase 3	Pgm3	-2.16	0.004823
17369787	microRNA 199b	Mir199b	-2.15	0.006233
17231066	denticleless homolog (Drosophila)	Dtl	-2.15	0.00461
17324394	small nucleolar RNA, C/D box 2; eukaryotic translation initiation factor 4A2	Snord2	-2.15	0.000238
17339476	WD repeat domain 43	Wdr43	-2.15	0.001814
17352913	desmocollin 3	Dsc3	-2.15	0.021847
17399086	mex3 homolog A (C. elegans)	Mex3a	-2.15	0.002272
17411594	UBX domain protein 2B	Ubxn2b	-2.15	0.002107
17450937	RIKEN cDNA 4930522L14 gene	4930522L14Rik	-2.15	0.008318
17455903	ankyrin repeat and SOCS box-containing 4	Asb4	-2.15	0.003658
17211258	retinol dehydrogenase 10 (all-trans)	Rdh10	-2.14	0.001668
17243850	PARP1 binding protein	Parpbp	-2.14	0.000576
17244661	transmembrane and tetratricopeptide repeat containing 2	Tmtc2	-2.14	0.000418
17331481	roundabout homolog 2 (Drosophila)	Robo2	-2.14	0.003465
17359020	kinesin family member 11	Kif11	-2.14	0.002162
17396492	eukaryotic translation initiation factor 5A2	Eif5a2	-2.14	0.016646
17512169	predicted gene, 26301 [Source:MGI Symbol;Acc:MGI:5456078]	Gm26301	-2.14	0.000906
17535930	dyskeratosis congenita 1, dyskerin	Dkc1	-2.14	0.001661
17544164	ribosomal protein S6 kinase polypeptide 6	Rps6ka6	-2.14	0.003323
17249176	heterogeneous nuclear ribonucleoprotein H1	Hnrnph1	-2.13	0.000391
17321246	small nucleolar RNA, H/ACA box 2B	Snora2b	-2.13	0.003589
17345977	shugoshin-like 1 (S. pombe)	Sgol1	-2.13	0.001161
17349544	small nucleolar RNA host gene 4	Snhg4	-2.13	0.002022
17405062	poly(A) binding protein, cytoplasmic 4-like	Pabpc4l	-2.13	0.00159
17429800	RIKEN cDNA D830031N03 gene	D830031N03Rik	-2.13	0.001304
17430037	tektin 2	Tekt2	-2.13	0.021644
17514826	TATA box binding protein (Tbp)-associated factor, RNA polymerase I, D	Taf1d	-2.13	0.028661
17537839	G protein-coupled receptor associated sorting protein 2	Gprasp2	-2.13	0.001033
17538297	transmembrane protein 164	Tmem164	-2.13	8.4e-05
17548090			-2.13	0.003732
17246860	4-nitrophenylphosphatase domain and non-neuronal SNAP25-like protein homolog 1 (C. elegans)	Nipsnap1	-2.12	0.000998
17319403	ribosomal protein L3	Rpl3	-2.12	0.002914
17324546	osteocrin	Ostn	-2.12	0.000186
17415778	asparagine-linked glycosylation 6 (alpha-1,3,-glucosyltransferase)	Alg6	-2.12	0.007463
17423340	transmembrane protein 67	Tmem67	-2.12	0.00224
17246299	cyclin-dependent kinase 2	Cdk2	-2.11	1.9e-05
17248512	NudC domain containing 2	Nudcd2	-2.11	0.001428
17252272	MIS12 homolog (yeast)	Mis12	-2.11	0.006433
17331533	heat shock protein 70 family, member 13	Hspa13	-2.11	0.001624
17350078	RIKEN cDNA 2900055J20 gene	2900055J20Rik	-2.11	0.003769
17352120	par-6 family cell polarity regulator gamma	Pard6g	-2.11	0.00021
17401790	AKNA domain containing 1	Aknad1	-2.11	0.001774
17413528	maternal embryonic leucine zipper kinase	Melk	-2.11	0.003239
17424201	predicted gene, 24837 [Source:MGI Symbol;Acc:MGI:5454614]	Gm24837	-2.11	0.012334
17477401	RIKEN cDNA 2410002F23 gene	2410002F23Rik	-2.11	0.00136
17479041	a disintegrin-like and metallopeptidase (reprolysin type) with thrombospondin type 1 motif, 17	Adamts17	-2.11	0.000264
17510685	endothelin receptor type A	Ednra	-2.11	0.023276
17221633	minichromosome maintenance deficient 3 (S. cerevisiae)	Mcm3	-2.1	0.001987
17254249	TAF15 RNA polymerase II, TATA box binding protein (TBP)-associated factor	Taf15	-2.1	0.002636
17276007	thioredoxin-related transmembrane protein 1	Tmx1	-2.1	0.000788
17381999	SKI/DACH domain containing 1	Skida1	-2.1	0.000738
17409649	vascular cell adhesion molecule 1	Vcam1	-2.1	0.003046
17416566	mago homolog, exon junction complex core component	Magoh	-2.1	0.000264
17421384	ZNF41, pseudogene; gene trap 140, Institute of Molecular Embryology and Genetics	Znf41-ps	-2.1	0.000644
17421444	predicted gene 13248; gene trap 140, Institute of Molecular Embryology and Genetics	Gm13248	-2.1	0.000468
17456084	forkhead box P2	Foxp2	-2.1	0.001337
17471222	cyclin D2	Ccnd2	-2.1	0.002915
17538658	WNK lysine deficient protein kinase 3	Wnk3	-2.1	0.003639
17239142	sterile alpha motif domain containing 5	Samd5	-2.09	0.001452
17286009	tyrosyl-DNA phosphodiesterase 2	Tdp2	-2.09	0.000707
17317233	ATPase family, AAA domain containing 2	Atad2	-2.09	0.005402
17374283	katanin p80 subunit B like 1; solute carrier family 12, member 6	Katnbl1	-2.09	0.009796
17416481	NDC1 transmembrane nucleoporin	Ndc1	-2.09	0.000327
17489886	cyclin E1	Ccne1	-2.09	0.000179
17547497			-2.09	0.002783
17550450			-2.09	0.0005
17264769	ephrin B3	Efnb3	-2.08	0.00103
17316120	cadherin 6	Cdh6	-2.08	0.009595
17331987	MIS18 kinetochore protein homolog A (S. pombe)	Mis18a	-2.08	0.002662
17341412	zinc finger protein 944	Zfp944	-2.08	0.031166
17366758	predicted gene, 24488 [Source:MGI Symbol;Acc:MGI:5454265]; predicted gene, 25701 [Source:MGI Symbol;Acc:MGI:5455478]; predicted gene, 26431 [Source:MGI Symbol;Acc:MGI:5456208]	Gm24488	-2.08	0.000787
17366802	predicted gene, 24488 [Source:MGI Symbol;Acc:MGI:5454265]; predicted gene, 25701 [Source:MGI Symbol;Acc:MGI:5455478]; predicted gene, 26431 [Source:MGI Symbol;Acc:MGI:5456208]	Gm24488	-2.08	0.000787
17366838	predicted gene, 24488 [Source:MGI Symbol;Acc:MGI:5454265]; predicted gene, 25701 [Source:MGI Symbol;Acc:MGI:5455478]; predicted gene, 26431 [Source:MGI Symbol;Acc:MGI:5456208]	Gm24488	-2.08	0.000787
17402681	3-phosphoadenosine 5-phosphosulfate synthase 1	Papss1	-2.08	0.00046
17459097	multimerin 1	Mmrn1	-2.08	0.008092
17477734	TEA domain family member 2	Tead2	-2.08	5.1e-05
17501484	sparc/osteonectin, cwcv and kazal-like domains proteoglycan 3	Spock3	-2.08	0.001015
17548264			-2.08	0.000361
17237547	carboxypeptidase M	Cpm	-2.07	0.016335
17247695	exportin 1, CRM1 homolog (yeast)	Xpo1	-2.07	0.006638
17288079	predicted gene, 24588 [Source:MGI Symbol;Acc:MGI:5454365]	Gm24588	-2.07	0.006783
17290083	embigin	Emb	-2.07	0.005182
17295136	IQ motif containing GTPase activating protein 2	Iqgap2	-2.07	0.000102
17308046	neurofilament, medium polypeptide	Nefm	-2.07	0.000539
17388725	four jointed box 1 (Drosophila)	Fjx1	-2.07	0.000883
17389522	aquarius	Aqr	-2.07	0.002269
17391506	predicted gene 10762 [Source:MGI Symbol;Acc:MGI:3704209]	Gm10762	-2.07	0.000812
17420091	heterogeneous nuclear ribonucleoprotein R	Hnrnpr	-2.07	0.00215
17423107	thymocyte selection-associated high mobility group box	Tox	-2.07	0.007461
17436999	collapsin response mediator protein 1	Crmp1	-2.07	0.000374
17522235	cell division cycle 25A	Cdc25a	-2.07	0.002619
17538356	asparagine-linked glycosylation 13	Alg13	-2.07	0.00225
17545482	melanoma antigen, family H, 1	Mageh1	-2.07	0.000267
17298112	wingless-type MMTV integration site family, member 5A	Wnt5a	-2.06	0.001767
17305789	discs, large (Drosophila) homolog-associated protein 5	Dlgap5	-2.06	0.000318
17363220	centrosomal protein 78	Cep78	-2.06	0.000117
17377525	GINS complex subunit 1 (Psf1 homolog)	Gins1	-2.06	0.000235
17415439	intraflagellar transport 74	Ift74	-2.06	0.013222
17426929	basonuclin 2	Bnc2	-2.06	0.002318
17446981	fibronectin type III domain containing 4	Fndc4	-2.06	0.001696
17450091	RIKEN cDNA 5430416N02 gene	5430416N02Rik	-2.06	0.004211
17470175	zinc finger protein 248	Zfp248	-2.06	0.01094
17253570	sperm associated antigen 5	Spag5	-2.05	0.000574
17291053	histone cluster 1, H4i	Hist1h4i	-2.05	0.007702
17361454	cornichon homolog 2 (Drosophila)	Cnih2	-2.05	0.000473
17418592	claspin	Clspn	-2.05	0.000935
17440164	coiled-coil domain containing 18	Ccdc18	-2.05	0.00231
17522280	predicted gene 10615; SWI/SNF related, matrix associated, actin dependent regulator of chromatin, subfamily c, member 1	Gm10615	-2.05	0.000581
17525198	neurotrimin	Ntm	-2.05	0.000235
17537356	protocadherin 11 X-linked	Pcdh11x	-2.05	0.002012
17549218			-2.05	0.00081
17549308			-2.05	0.00081
17240022	centromere protein W	Cenpw	-2.04	0.001539
17243509	nuclear transcription factor-Y beta	Nfyb	-2.04	0.001852
17294664	polymerase (RNA) III (DNA directed) polypeptide G	Polr3g	-2.04	0.002353
17304493	guanine nucleotide binding protein-like 3 (nucleolar)	Gnl3	-2.04	0.00244
17372045	homeobox D11	Hoxd11	-2.04	0.008094
17402936	solute carrier family 39 (metal ion transporter), member 8	Slc39a8	-2.04	0.005844
17445381	GTP-binding protein 10 (putative)	Gtpbp10	-2.04	0.008334
17461166	glucoside xylosyltransferase 2	Gxylt2	-2.04	0.001398
17217846	microRNA 181b-1	Mir181b-1	-2.03	0.004421
17235843	expressed sequence AU041133	AU041133	-2.03	0.037499
17237564	transformed mouse 3T3 cell double minute 1	Mdm1	-2.03	0.003697
17240231			-2.03	0.012861
17248472	predicted gene 12122 [Source:MGI Symbol;Acc:MGI:3650741]	Gm12122	-2.03	0.026854
17253858	ATPase family, AAA domain containing 5	Atad5	-2.03	0.003716
17288231	RING1 and YY1 binding protein, pseudogene	Rybp-ps	-2.03	0.03009
17311457	predicted gene, 23530 [Source:MGI Symbol;Acc:MGI:5453307]	Gm23530	-2.03	0.012561
17313320	predicted gene, 22067 [Source:MGI Symbol;Acc:MGI:5451844]	Gm22067	-2.03	0.010741
17325454	polymerase (DNA directed), theta	Polq	-2.03	0.000495
17334299	RAB26, member RAS oncogene family, opposite strand	Rab26os	-2.03	0.000932
17344990	centromere protein Q	Cenpq	-2.03	0.00174
17350591	synuclein, alpha interacting protein (synphilin)	Sncaip	-2.03	0.001137
17376626	minichromosome maintenance deficient 8 (S. cerevisiae)	Mcm8	-2.03	0.002106
17406145	glutamate receptor, ionotropic, AMPA2 (alpha 2)	Gria2	-2.03	0.004618
17408345	hydroxy-delta-5-steroid dehydrogenase, 3 beta- and steroid delta-isomerase 6	Hsd3b6	-2.03	0.009791
17413821	acidic (leucine-rich) nuclear phosphoprotein 32 family, member B	Anp32b	-2.03	0.000115
17415715	ubiquitin specific peptidase 1	Usp1	-2.03	0.004219
17419097	adhesion G protein-coupled receptor B2	Adgrb2	-2.03	0.003876
17432770	predicted gene 13157; RIKEN cDNA 2610036A22 gene	Gm13157	-2.03	0.016643
17468532	germ cell-less homolog 1 (Drosophila)	Gmcl1	-2.03	0.000751
17507258	cortexin 1	Ctxn1	-2.03	0.003456
17514760	meiotic recombination 11 homolog A (S. cerevisiae)	Mre11a	-2.03	0.005565
17539700	midline 1	Mid1	-2.03	0.000302
17246352	growth differentiation factor 11	Gdf11	-2.02	0.004222
17266988	transcriptional adaptor 2A	Tada2a	-2.02	0.000225
17287330	CDC28 protein kinase regulatory subunit 2	Cks2	-2.02	0.001813
17291057	histone cluster 1, H2ag	Hist1h2ag	-2.02	0.011022
17332893	transmembrane protein 181A	Tmem181a	-2.02	0.000106
17370659	kinesin family member 5C	Kif5c	-2.02	0.027432
17417407	phosphatidylinositol 3 kinase, regulatory subunit, polypeptide 3 (p55)	Pik3r3	-2.02	0.00234
17440465	polymerase (DNA directed), epsilon	Pole	-2.02	0.000892
17454226	minichromosome maintenance deficient 7 (S. cerevisiae)	Mcm7	-2.02	0.000548
17459157	SWI/SNF-related, matrix-associated actin-dependent regulator of chromatin, subfamily a, containing DEAD/H box 1	Smarcad1	-2.02	0.001536
17459236	MAD2 mitotic arrest deficient-like 1	Mad2l1	-2.02	0.004413
17473047	family with sequence similarity 60, member A	Fam60a	-2.02	0.00029
17501976	myo-inositol 1-phosphate synthase A1	Isyna1	-2.02	0.000148
17507321	ephrin B2	Efnb2	-2.02	0.012953
17516420	microRNA 125b-1	Mir125b-1	-2.02	0.002431
17535208	fragile X mental retardation syndrome 1	Fmr1	-2.02	0.001795
17317056	ectonucleotide pyrophosphatase/phosphodiesterase 2	Enpp2	-2.01	0.001657
17335842	phosphodiesterase 9A	Pde9a	-2.01	3.7e-05
17351196	adenomatosis polyposis coli down-regulated 1	Apcdd1	-2.01	0.005682
17362595	fatty acid desaturase 2	Fads2	-2.01	0.001561
17366451	FERM domain containing 4A	Frmd4a	-2.01	0.007218
17372984	nucleoporin 160	Nup160	-2.01	0.00515
17377793	TPX2, microtubule-associated protein homolog (Xenopus laevis)	Tpx2	-2.01	0.000543
17402485	zinc finger, GRF-type containing 1	Zgrf1	-2.01	0.019376
17403919	DEP domain containing 1a	Depdc1a	-2.01	0.006475
17443883	zinc finger protein 157	Zfp157	-2.01	0.002685
17495466	ADP-ribosylation factor-like 6 interacting protein 1	Arl6ip1	-2.01	0.002508
17529549	small nucleolar RNA host gene 5	Snhg5	-2.01	0.003759
17214053	X-ray repair complementing defective repair in Chinese hamster cells 5	Xrcc5	-2	0.000131
17222549	ring finger protein 149	Rnf149	-2	0.000886
17251370	myosin, heavy polypeptide 10, non-muscle	Myh10	-2	0.000474
17324001	endothelin converting enzyme 2	Ece2	-2	0.000132
17332166	downstream neighbor of SON; ATP synthase, H+ transporting, mitochondrial F1 complex, O subunit	Donson	-2	0.003799
17340427	predicted gene, 20939	Gm20939	-2	0.015713
17385044	Rho family GTPase 3	Rnd3	-2	0.000767
17411591			-2	7.2e-05
17428803	kinesin family member 2C	Kif2c	-2	0.000377
17429632	major facilitator superfamily domain containing 2A	Mfsd2a	-2	0.002582
17456131	testis derived transcript	Tes	-2	0.001062
17456285	LSM8 homolog, U6 small nuclear RNA associated (S. cerevisiae)	Lsm8	-2	0.000801
17466659	transformer 2 alpha homolog (Drosophila)	Tra2a	-2	0.000122
17472678	branched chain aminotransferase 1, cytosolic	Bcat1	-2	0.000247
17476219	zinc finger protein 420	Zfp420	-2	0.014383
17520932	topoisomerase (DNA) II binding protein 1	Topbp1	-2	0.002798
17231461	estrogen receptor 1 (alpha)	Esr1	2	0.003172
17260137	kringle containing transmembrane protein 1	Kremen1	2	0.006122
17281843	dehydrogenase/reductase (SDR family) member 7	Dhrs7	2	0.000365
17421981	tumor necrosis factor receptor superfamily, member 9	Tnfrsf9	2	0.020891
17428967	importin 13	Ipo13	2	0.000456
17451839	glutathione S-transferase mu 2 (muscle), pseudogene 1	Gstm2-ps1	2	0.012152
17213179	NADH dehydrogenase (ubiquinone) 1 beta subcomplex 3	Ndufb3	2.01	0.000558
17221373	glyceraldehyde-3-phosphate dehydrogenase pseudogene	Gm5523	2.01	0.003305
17274875	nicotinamide phosphoribosyltransferase	Nampt	2.01	0.002002
17313577			2.01	0.003893
17326658	ubiquitin specific peptidase 25	Usp25	2.01	0.001637
17363757	RIKEN cDNA 4430402I18 gene	4430402I18Rik	2.01	0.002889
17385422	activin A receptor, type IC	Acvr1c	2.01	0.043825
17431187	centrosomal protein 85	Cep85	2.01	1e-05
17440711	RIKEN cDNA 1700095B10 gene	1700095B10Rik	2.01	0.002544
17462145	RIKEN cDNA 8430408G22 gene	8430408G22Rik	2.01	0.01371
17530243	transferrin	Trf	2.01	0.035709
17534960	four and a half LIM domains 1	Fhl1	2.01	0.003924
17230078	myeloid cell nuclear differentiation antigen; interferon activated gene 204	Mnda	2.02	0.017918
17312567	glutamic pyruvic transaminase, soluble	Gpt	2.02	0.004942
17378337	microtubule-associated protein 1 light chain 3 alpha	Map1lc3a	2.02	0.0003
17468551	annexin A4	Anxa4	2.02	0.014208
17470468	microtubule associated monooxygenase, calponin and LIM domain containing 3	Mical3	2.02	0.003433
17221923	nuclear encoded rRNA 5S 209 [Source:MGI Symbol;Acc:MGI:4422074]	n-R5s209	2.03	0.040395
17238433	citrate synthase	Cs	2.03	0.000571
17278810	microRNA 380	Mir380	2.03	0.003279
17278882	microRNA 377	Mir377	2.03	0.003442
17328070	tektin 5	Tekt5	2.03	0.004747
17396581	sterile alpha motif domain containing 7	Samd7	2.03	9.3e-05
17398970	myocyte enhancer factor 2D	Mef2d	2.03	0.0003
17429476	potassium voltage-gated channel, subfamily Q, member 4	Kcnq4	2.03	0.001367
17437836	cholinergic receptor, nicotinic, alpha polypeptide 9	Chrna9	2.03	0.004143
17452054	2-5 oligoadenylate synthetase 2	Oas2	2.03	0.015648
17502944	NADH dehydrogenase (ubiquinone) 1 beta subcomplex, 7	Ndufb7	2.03	0.001881
17507171	ribonuclease P RNA-like 3	Rprl3	2.03	0.00363
17518238	calmodulin-like 4	Calml4	2.03	0.00074
17521875	solute carrier family 25 (mitochondrial carnitine/acylcarnitine translocase), member 20	Slc25a20	2.03	0.001394
17525090	galactosidase, beta 1-like 2	Glb1l2	2.03	0.001896
17550418			2.03	0.00158
17239919	laminin, alpha 2	Lama2	2.04	0.001928
17299785	T cell receptor alpha variable 6D-3	Trav6d-3	2.04	0.003598
17313677	patatin-like phospholipase domain containing 3	Pnpla3	2.04	0.028406
17388074	NADH dehydrogenase (ubiquinone) Fe-S protein 3	Ndufs3	2.04	0.000486
17462451	solute carrier family 6 (neurotransmitter transporter, GABA), member 13	Slc6a13	2.04	0.0313
17463148	microRNA 3098; mitochondrial ribosomal protein L51	Mir3098	2.04	0.009772
17472517	lactate dehydrogenase B	Ldhb	2.04	0.000183
17213598	zinc finger, DBF-type containing 2	Zdbf2	2.05	0.031175
17254153	schlafen 5	Slfn5	2.05	0.005095
17356897	RAS, guanyl releasing protein 2	Rasgrp2	2.05	0.000289
17358103	aldehyde dehydrogenase family 1, subfamily A1	Aldh1a1	2.05	0.005404
17386778	titin	Ttn	2.05	0.005041
17391834	sialic acid binding Ig-like lectin 1, sialoadhesin	Siglec1	2.05	0.002516
17454209	gap junction protein, gamma 3	Gjc3	2.05	0.025111
17530159	protein phosphatase 2, regulatory subunit B, alpha	Ppp2r3a	2.05	0.023768
17548102	predicted gene 10053 [Source:MGI Symbol;Acc:MGI:3704493]	Gm10053	2.05	0.004228
17548541	cytochrome c, somatic	Cycs	2.05	0.004228
17269889	prostaglandin E synthase 3 (cytosolic)-like	Ptges3l	2.06	0.005361
17292139	mitochondrial calcium uniporter regulator 1	Mcur1	2.06	0.000165
17312341	glutamate receptor, ionotropic, N-methyl D-aspartate-associated protein 1 (glutamate binding)	Grina	2.06	0.00021
17322735	methyltransferase like 22	Mettl22	2.06	0.014787
17359716	hypoxia-inducible factor 1, alpha subunit inhibitor	Hif1an	2.06	0.043011
17407354	S100 calcium binding protein A1	S100a1	2.06	0.018787
17433672	family with sequence similarity 213, member B	Fam213b	2.06	6.2e-05
17500380	dual specificity phosphatase 26 (putative)	Dusp26	2.06	0.007665
17545936	carbonic anhydrase 5b, mitochondrial	Car5b	2.06	0.019459
17257197	microtubule-associated protein tau	Mapt	2.07	0.00738
17272785	lectin, galactoside-binding, soluble, 3 binding protein	Lgals3bp	2.07	0.004815
17312127	protein tyrosine phosphatase 4a3	Ptp4a3	2.07	0.001638
17325719	NADH dehydrogenase Fe-S protein 5 pseudogene; NADH dehydrogenase (ubiquinone) Fe-S protein 5	BC002163	2.07	0.001672
17332628	C2 calcium-dependent domain containing 2	C2cd2	2.07	1.6e-05
17336824	heat shock protein 1-like	Hspa1l	2.07	0.001234
17432912	F-box protein 6	Fbxo6	2.07	0.001231
17434833	piccolo (presynaptic cytomatrix protein)	Pclo	2.07	0.000271
17502039	RAB3A, member RAS oncogene family	Rab3a	2.07	0.000297
17516594	solute carrier family 37 (glucose-6-phosphate transporter), member 4	Slc37a4	2.07	0.000277
17531080	ring finger protein 123	Rnf123	2.07	0.000311
17229988	cell adhesion molecule 3	Cadm3	2.08	0.01777
17277766	thyroid stimulating hormone receptor	Tshr	2.08	0.004318
17290865	ependymin related protein 1 (zebrafish)	Epdr1	2.08	0.000102
17381300			2.08	0.005756
17401345	protein phosphatase 1J	Ppm1j	2.08	0.001236
17407850	extracellular matrix protein 1	Ecm1	2.08	0.001583
17443310	malate dehydrogenase 2, NAD (mitochondrial)	Mdh2	2.08	0.000349
17509180	glyceraldehyde-3-phosphate dehydrogenase pseudogene	Gm10313	2.08	0.009433
17547877	DEP domain containing MTOR-interacting protein	Deptor	2.08	0.005801
17234403	gamma-glutamyltransferase 5	Ggt5	2.09	0.004011
17278795	predicted gene, 23787 [Source:MGI Symbol;Acc:MGI:5453564]	Gm23787	2.09	0.001634
17280590	protein kinase, cAMP dependent regulatory, type II beta	Prkar2b	2.09	0.006131
17321169	ankyrin repeat and SOCS box-containing 8	Asb8	2.09	0.003595
17462437	ubiquitin specific peptidase 18	Usp18	2.09	0.006424
17478919	threonyl-tRNA synthetase-like 2	Tarsl2	2.09	0.003885
17487374	apolipoprotein C-I	Apoc1	2.09	0.030872
17508907	mitochondrial tumor suppressor 1	Mtus1	2.09	3e-05
17233708	leucine rich repeat containing 20	Lrrc20	2.1	0.006647
17471166	NADH dehydrogenase (ubiquinone) 1 alpha subcomplex, 9	Ndufa9	2.1	0.000753
17475787	dual-specificity tyrosine-(Y)-phosphorylation regulated kinase 1b	Dyrk1b	2.1	0.001351
17528350	F-box and leucine-rich repeat protein 22	Fbxl22	2.1	0.001462
17323532	purinergic receptor P2X, ligand-gated ion channel, 6	P2rx6	2.11	0.007246
17327737	sarcalumenin	Srl	2.11	0.009108
17343278	heat shock transcription factor 2 binding protein	Hsf2bp	2.11	0.017562
17354599	myozenin 3	Myoz3	2.11	0.007881
17358271	predicted gene 10053 [Source:MGI Symbol;Acc:MGI:3704493]	Gm10053	2.11	0.000806
17301899	succinate-Coenzyme A ligase, ADP-forming, beta subunit; predicted gene, 41209	Sucla2	2.12	0.00035
17328062	epithelial membrane protein 2	Emp2	2.12	0.010394
17364218	cytoplasmic polyadenylation element binding protein 3	Cpeb3	2.12	0.000295
17369821	prostaglandin E synthase 2	Ptges2	2.12	0.000233
17439622	1-acylglycerol-3-phosphate O-acyltransferase 9	Agpat9	2.12	0.018613
17483733	BCL2-associated athanogene 3	Bag3	2.12	0.000236
17535681	serine/arginine-rich protein specific kinase 3	Srpk3	2.12	0.04332
17235268	NADH dehydrogenase (ubiquinone) Fe-S protein 7	Ndufs7	2.13	8.8e-05
17236003	t-complex 11 (mouse) like 2	Tcp11l2	2.13	0.001033
17251527	period circadian clock 1	Per1	2.13	0.006403
17278791	predicted gene, 22981 [Source:MGI Symbol;Acc:MGI:5452758]	Gm22981	2.13	0.000663
17353626	proline rich basic protein 1	Prob1	2.13	0.003019
17478883	methylmalonyl CoA epimerase	Mcee	2.13	0.001597
17516740	sodium channel, type IV, beta	Scn4b	2.13	0.001171
17329056	RIKEN cDNA A930003A15 gene	A930003A15Rik	2.14	0.027952
17332804	synaptojanin 2	Synj2	2.14	0.00041
17387305	frizzled-related protein	Frzb	2.14	0.048374
17397333	predicted gene, 30289; La ribonucleoprotein domain family, member 1B	Gm30289	2.14	0.000115
17407764	prune homolog (Drosophila)	Prune	2.14	0.001103
17529185	filamin A interacting protein 1	Filip1	2.14	0.002888
17537592	sushi-repeat-containing protein, X-linked 2	Srpx2	2.14	0.002494
17217101	solute carrier family 41, member 1	Slc41a1	2.15	0.000151
17229629	succinate dehydrogenase complex, subunit C, integral membrane protein	Sdhc	2.15	0.000856
17234131	myoregulin	Mrln	2.15	0.023243
17260175	predicted gene, 22471 [Source:MGI Symbol;Acc:MGI:5452248]	Gm22471	2.15	0.003443
17296082	apolipoprotein O, pseudogene	Apoo-ps	2.15	0.004532
17306360			2.15	0.026251
17340673	fibronectin type III domain containing 1	Fndc1	2.15	0.002078
17347633	predicted gene, 19689	Gm19689	2.15	0.003812
17361741	EH domain binding protein 1-like 1	Ehbp1l1	2.15	0.005397
17438969	platelet factor 4	Pf4	2.15	0.000935
17464534	sterile alpha motif domain containing 9-like	Samd9l	2.15	0.004721
17514078	angiotensinogen (serpin peptidase inhibitor, clade A, member 8)	Agt	2.15	0.00034
17230055	interferon-activable protein 203-like	Gm16340	2.16	0.003987
17242088	pericentrin (kendrin)	Pcnt	2.16	0.001325
17297759	annexin A11; predicted gene 2260; predicted gene 2274	Anxa11	2.16	0.003523
17318350	plectin	Plec	2.16	0.00055
17361850	CDC42 effector protein (Rho GTPase binding) 2	Cdc42ep2	2.16	0.002372
17379957	predicted gene 14319 [Source:MGI Symbol;Acc:MGI:3649450]	Gm14319	2.16	0.022715
17473166	calcium channel, voltage-dependent, gamma subunit 6	Cacng6	2.16	0.018075
17475975	enoyl coenzyme A hydratase 1, peroxisomal	Ech1	2.16	0.00348
17496354	sulfotransferase family 1A, phenol-preferring, member 1	Sult1a1	2.16	0.002642
17508125	predicted gene 15816	Gm15816	2.16	0.005444
17518512	cartilage intermediate layer protein, nucleotide pyrophosphohydrolase	Cilp	2.16	0.018113
17229403	microsomal glutathione S-transferase 3	Mgst3	2.17	0.000126
17278858	microRNA 485; miRNA containing gene	Mir485	2.17	0.002446
17445624	predicted pseudogene 10108 [Source:MGI Symbol;Acc:MGI:3642431]	Gm10108	2.17	0.000295
17489223	cytochrome c oxidase, subunit VIb polypeptide 1	Cox6b1	2.17	0.000359
17521300	cytokine inducible SH2-containing protein	Cish	2.17	0.005655
17385099	nebulin	Neb	2.18	0.000773
17440312	fibroblast growth factor receptor-like 1	Fgfrl1	2.18	0.002111
17477670	Harvey rat sarcoma oncogene, subgroup R	Rras	2.18	0.000447
17526776	neural cell adhesion molecule 1	Ncam1	2.18	0.001532
17215697	receptor (calcitonin) activity modifying protein 1	Ramp1	2.19	0.000122
17361056	NADH dehydrogenase (ubiquinone) flavoprotein 1	Ndufv1	2.19	2.9e-05
17369131	phytanoyl-CoA dioxygenase domain containing 1	Phyhd1	2.19	0.0004
17478044	transmembrane protein 143	Tmem143	2.19	0.001427
17541036	NADH dehydrogenase (ubiquinone) 1 alpha subcomplex, 1	Ndufa1	2.19	2.2e-05
17260699	cordon-bleu WH2 repeat	Cobl	2.2	0.013026
17297801	predicted gene 2260; predicted gene 2274	Gm2260	2.2	0.000218
17297833	predicted gene 2260; predicted gene 2274	Gm2260	2.2	0.000218
17343710	histocompatibility 2, K1, K region; histocompatibility 2, D region locus 1	H2-K1	2.2	0.001626
17381892	3-hydroxyacyl-CoA dehydratase 1	Hacd1	2.2	0.000569
17386090	sodium channel, voltage-gated, type VII, alpha	Scn7a	2.2	0.000527
17443535	UFM1-specific peptidase 1	Ufsp1	2.2	0.003798
17448735	SLAIN motif family, member 2	Slain2	2.2	0.003294
17469879	tissue inhibitor of metalloproteinase 4	Timp4	2.2	0.003836
17517404	DnaJ (Hsp40) homolog, subfamily A, member 4	Dnaja4	2.2	0.020092
17282484	predicted pseudogene 5436 [Source:MGI Symbol;Acc:MGI:3643291]	Gm5436	2.21	0.003004
17384525	NADH dehydrogenase (ubiquinone) 1 alpha subcomplex, 8	Ndufa8	2.21	3.7e-05
17494643	predicted gene 4070	Gm4070	2.21	0.01641
17503031	protein kinase, cAMP dependent, catalytic, alpha	Prkaca	2.21	0.01267
17523281	trafficking protein, kinesin binding 1	Trak1	2.21	7e-05
17548616	predicted pseudogene 6415 [Source:MGI Symbol;Acc:MGI:3648526]	Gm6415	2.21	0.003959
17242416	DNA segment, Chr 10, Johns Hopkins University 81 expressed	D10Jhu81e	2.22	5.2e-05
17278848	microRNA 539	Mir539	2.22	0.009482
17320652	ATP-binding cassette, sub-family D (ALD), member 2	Abcd2	2.22	0.000186
17364474	PDZ and LIM domain 1 (elfin)	Pdlim1	2.22	0.010948
17410390	hydroxyacyl-Coenzyme A dehydrogenase	Hadh	2.22	1.7e-05
17437385	superoxide dismutase 3, extracellular	Sod3	2.22	0.000561
17494664	very large inducible GTPase 1 pseudogene	Gm8989	2.22	0.004213
17518909	predicted gene, 22962 [Source:MGI Symbol;Acc:MGI:5452739]	Gm22962	2.22	0.009796
17252341	XIAP associated factor 1	Xaf1	2.23	0.007799
17260944	malate dehydrogenase 1, NAD (soluble)	Mdh1	2.23	0.000191
17287148	extracellular matrix protein 2, female organ and adipocyte specific	Ecm2	2.23	0.001284
17291355	acyl-CoA thioesterase 13	Acot13	2.23	0.000131
17303625	nuclear receptor subfamily 1, group D, member 2	Nr1d2	2.23	0.003954
17346150	leucine-rich alpha-2-glycoprotein 1	Lrg1	2.23	0.004352
17371451	kelch-like 41	Klhl41	2.23	0.025748
17464282	sarcospan	Sspn	2.23	0.000452
17478797	ATP synthase, H+ transporting, mitochondrial F0 complex, subunit G, pseudogene 1	Atp5l-ps1	2.23	0.000241
17533269	tetraspanin 7	Tspan7	2.23	0.000161
17260023	ubiquinol-cytochrome c reductase, complex III subunit X	Uqcr10	2.24	0.000626
17322664	SEC14-like lipid binding 5	Sec14l5	2.24	0.000784
17351001	calcium/calmodulin-dependent protein kinase II alpha	Camk2a	2.24	0.009474
17414729	orosomucoid 1	Orm1	2.24	0.009217
17476620	predicted pseudogene 6669 [Source:MGI Symbol;Acc:MGI:3646884]	Gm6669	2.24	0.022713
17476728	CCAAT/enhancer binding protein (C/EBP), alpha	Cebpa	2.24	0.013366
17493632	diacylglycerol O-acyltransferase 2	Dgat2	2.24	0.015525
17529169	cytochrome c oxidase subunit VIIa 2	Cox7a2	2.24	0.000438
17283303	coiled-coil domain containing 88C	Ccdc88c	2.25	0.000247
17318013	Ly6/neurotoxin 1	Lynx1	2.25	0.003532
17340197	endothelial PAS domain protein 1	Epas1	2.25	0.009942
17420897	succinate dehydrogenase complex, subunit B, iron sulfur (Ip)	Sdhb	2.25	0.000227
17425533	erythrocyte membrane protein band 4.1 like 4b	Epb41l4b	2.25	0.000246
17500922	PDZ and LIM domain 3	Pdlim3	2.25	0.001216
17215650	leucine rich repeat (in FLII) interacting protein 1	Lrrfip1	2.26	0.001542
17224360	protein kinase, AMP-activated, gamma 3 non-catatlytic subunit	Prkag3	2.26	0.010937
17370043	angiopoietin-like 2	Angptl2	2.26	0.001039
17427961	carnitine palmitoyltransferase 2	Cpt2	2.26	0.000248
17450741	ATP synthase, H+ transporting, mitochondrial F1F0 complex, subunit E	Atp5k	2.26	3.3e-05
17278850	microRNA 544	Mir544	2.27	0.003744
17278852	microRNA 382	Mir382	2.27	0.002215
17278880	microRNA 496a	Mir496a	2.27	0.005028
17290324	phosphofructokinase, platelet	Pfkp	2.27	0.032901
17296317	heat shock protein 3	Hspb3	2.27	0.016192
17361805	nuclear paraspeckle assembly transcript 1 (non-protein coding)	Neat1	2.27	0.012994
17526843	succinate dehydrogenase complex, subunit D, integral membrane protein	Sdhd	2.27	0.000478
17549776			2.27	0.002407
17229665	NADH dehydrogenase (ubiquinone) Fe-S protein 2	Ndufs2	2.28	4.8e-05
17230252	RIKEN cDNA 2310043L19 gene	2310043L19Rik	2.28	0.048187
17270874	sodium channel, voltage-gated, type IV, alpha	Scn4a	2.28	1.7e-05
17467209	family with sequence similarity 13, member A	Fam13a	2.28	6.3e-05
17507605	growth arrest specific 6	Gas6	2.28	0.002125
17510640	Rho GTPase activating protein 10	Arhgap10	2.28	0.000543
17243034	MAP kinase-interacting serine/threonine kinase 2	Mknk2	2.29	0.000107
17248213	cytoplasmic polyadenylation element binding protein 4	Cpeb4	2.29	0.005634
17267584	A kinase (PRKA) anchor protein 1	Akap1	2.29	0.004671
17298262	musculoskeletal, embryonic nuclear protein 1	Mustn1	2.29	0.005797
17328368	myosin, heavy polypeptide 11, smooth muscle	Myh11	2.29	0.00236
17350090	SH3 domain containing ring finger 2	Sh3rf2	2.29	0.003431
17402996	DNA-damage-inducible transcript 4-like	Ddit4l	2.29	8e-06
17460665	monoglyceride lipase	Mgll	2.29	0.000725
17462843	CD163 antigen	Cd163	2.29	0.000795
17226313	STEAP family member 3	Steap3	2.3	0.006084
17242842	guanidinoacetate methyltransferase	Gamt	2.3	0.007148
17279509	cysteine-rich protein 1 (intestinal)	Crip1	2.3	0.005011
17410492	tet methylcytosine dioxygenase 2	Tet2	2.3	3.3e-05
17460185	dysferlin	Dysf	2.3	0.010501
17479736	transmembrane 6 superfamily member 1	Tm6sf1	2.3	0.046113
17518911	RAR-related orphan receptor alpha	Rora	2.3	0.000168
17530227	nuclear encoded rRNA 5S 89 [Source:MGI Symbol;Acc:MGI:4421937]	n-R5s89	2.3	0.003369
17300802	poly (ADP-ribose) polymerase family, member 4	Parp4	2.31	5.1e-05
17487927	lipase, hormone sensitive	Lipe	2.31	0.000188
17530653	aminolevulinic acid synthase 1	Alas1	2.31	2.3e-05
17212982	aldehyde oxidase 1	Aox1	2.32	0.001039
17234066	ankyrin 3, epithelial	Ank3	2.32	7.1e-05
17260742	predicted gene, 24714 [Source:MGI Symbol;Acc:MGI:5454491]	Gm24714	2.32	0.007302
17404329	glycogenin	Gyg	2.32	0.000461
17513590	F-box protein 31	Fbxo31	2.32	1.1e-05
17521996	ubiquinol-cytochrome c reductase core protein 1	Uqcrc1	2.32	4.9e-05
17335506	peptidase inhibitor 16	Pi16	2.33	0.000618
17369672	phospholipid phosphatase 7 (inactive)	Plpp7	2.33	0.000671
17369911	adenylate kinase 1	Ak1	2.33	0.001596
17292569	sema domain, immunoglobulin domain (Ig), transmembrane domain (TM) and short cytoplasmic domain, (semaphorin) 4D	Sema4d	2.34	0.000319
17295456	RIKEN cDNA 2310020H05 gene	2310020H05Rik	2.34	3.7e-05
17330264	F-box protein 40	Fbxo40	2.34	0.000219
17445715	CD36 antigen	Cd36	2.34	0.003049
17462663	microfibrillar associated protein 5	Mfap5	2.34	0.002206
17221553	polycystic kidney and hepatic disease 1	Pkhd1	2.35	0.009866
17269995	membrane protein, palmitoylated 3 (MAGUK p55 subfamily member 3)	Mpp3	2.35	0.001035
17441334	RIKEN cDNA C330018A13 gene	C330018A13Rik	2.35	0.005973
17492031	RIKEN cDNA 4833412C05 gene	4833412C05Rik	2.35	0.007466
17498041	dual specificity phosphatase 8	Dusp8	2.35	0.000968
17549502			2.35	0.00128
17549654			2.35	0.00128
17256924	ankyrin repeat and SOCS box-containing 16	Asb16	2.36	6.17e-07
17266534	kinase suppressor of ras 1	Ksr1	2.36	0.001623
17344456	RIKEN cDNA 2310061I04 gene	2310061I04Rik	2.36	0.000339
17470879	triosephosphate isomerase 1	Tpi1	2.36	0.003003
17483842	transforming, acidic coiled-coil containing protein 2	Tacc2	2.36	0.000471
17364208	protein phosphatase 1, regulatory (inhibitor) subunit 3C	Ppp1r3c	2.37	0.000405
17442185	predicted gene 6444	Gm6444	2.37	0.001692
17251179	myosin, heavy polypeptide 13, skeletal muscle	Myh13	2.38	0.005808
17278856	microRNA 668	Mir668	2.38	0.000741
17292390	WNK lysine deficient protein kinase 2	Wnk2	2.38	0.000212
17301055	C1q and tumor necrosis factor related protein 9	C1qtnf9	2.38	0.002915
17303958	dual specificity phosphatase and pro isomerase domain containing 1	Dupd1	2.38	0.000373
17315178	nuclear receptor subfamily 4, group A, member 1	Nr4a1	2.38	0.000857
17367963	ectonucleoside triphosphate diphosphohydrolase 2; neural proliferation, differentiation and control 1	Entpd2	2.38	0.000382
17504707	nucleolar protein 3 (apoptosis repressor with CARD domain)	Nol3	2.38	0.000141
17400592	hemochromatosis type 2 (juvenile) (human homolog)	Hfe2	2.39	0.003089
17491068	potassium inwardly rectifying channel, subfamily J, member 11	Kcnj11	2.39	0.000963
17494656	GTPase, very large interferon inducible 1; predicted gene 4070	Gvin1	2.39	0.009126
17547939	predicted pseudogene 4943	Gm4943	2.39	0.000307
17548916			2.39	0.00204
17282309	solute carrier family 8 (sodium/calcium exchanger), member 3	Slc8a3	2.4	0.013127
17284037	mitochondrial pyruvate carrier 1; mitochondrial pyruvate carrier 1, pseudogene	Mpc1	2.4	3.8e-05
17305986	ribonuclease P RNA component H1	Rpph1	2.4	0.034035
17333320	MAS-related GPR, member H	Mrgprh	2.4	0.006175
17418035	Cbp/p300-interacting transactivator, with Glu/Asp-rich carboxy-terminal domain, 4	Cited4	2.4	0.000326
17515539	endonuclease/exonuclease/phosphatase family domain containing 1	Eepd1	2.4	3e-06
17526861	dihydrolipoamide S-acetyltransferase (E2 component of pyruvate dehydrogenase complex)	Dlat	2.4	0.003306
17548981			2.4	0.000757
17237451	protein tyrosine phosphatase, receptor type, B	Ptprb	2.41	0.000573
17339876	glutaminyl-peptide cyclotransferase (glutaminyl cyclase)	Qpct	2.41	0.001111
17410630	predicted gene 5105	Gm5105	2.41	0.000248
17419902	myomesin family, member 3	Myom3	2.41	0.018211
17480420	p21 protein (Cdc42/Rac)-activated kinase 1	Pak1	2.41	0.001492
17488608	ryanodine receptor 1, skeletal muscle	Ryr1	2.41	0.000461
17530863	mitogen-activated protein kinase-activated protein kinase 3	Mapkapk3	2.41	0.000455
17214368	cytochrome P450, family 27, subfamily a, polypeptide 1	Cyp27a1	2.42	0.003805
17463298	predicted gene 16303 [Source:MGI Symbol;Acc:MGI:3826584]	Gm16303	2.42	0.002077
17230087	interferon activated gene 203	Ifi203	2.43	0.011948
17253656	vitronectin	Vtn	2.43	0.00478
17318160	v-maf musculoaponeurotic fibrosarcoma oncogene family, protein A (avian)	Mafa	2.43	0.000316
17347801	prolyl endopeptidase-like	Prepl	2.43	0.016707
17371912	sterile alpha motif and leucine zipper containing kinase AZK	Zak	2.43	0.00623
17492018	synemin, intermediate filament protein	Synm	2.43	0.000241
17494651	very large inducible GTPase 1 pseudogene	Gm8979	2.43	0.005294
17512434	tubulin polymerization-promoting protein family member 3	Tppp3	2.43	0.012519
17533207	Kell blood group precursor (McLeod phenotype) homolog	Xk	2.43	0.002552
17548117	predicted pseudogene 6293 [Source:MGI Symbol;Acc:MGI:3649011]	Gm6293	2.43	5.6e-05
17219222	myelin protein zero	Mpz	2.44	0.02195
17252609	purinergic receptor P2X, ligand-gated ion channel, 5	P2rx5	2.44	0.003379
17290965	cytochrome c oxidase subunit 5B, mitochondrial	LOC102641600	2.44	0.000191
17312236	GPI-anchored HDL-binding protein 1	Gpihbp1	2.44	0.000873
17451649	acyl-Coenzyme A dehydrogenase, short chain	Acads	2.44	1.3e-05
17520835	kyphoscoliosis peptidase	Ky	2.44	0.003344
17223903	acyl-Coenzyme A dehydrogenase, long-chain	Acadl	2.45	0.000352
17252906	microRNA 22; Mir22 host gene (non-protein coding); TLC domain containing 2	Mir22	2.45	0.012523
17390810	glycine amidinotransferase (L-arginine:glycine amidinotransferase)	Gatm	2.45	0.020222
17397288	predicted gene 2011; RIKEN cDNA 3110057O12 gene	Gm2011	2.45	0.00187
17231033	activating transcription factor 3	Atf3	2.46	3e-06
17477811	glycogen synthase 1, muscle	Gys1	2.46	0.00016
17506273	cytochrome c oxidase subunit IV isoform 1	Cox4i1	2.46	4.4e-05
17234910	cell division cycle 34	Cdc34	2.47	0.005228
17262915	coiled-coil domain containing 69	Ccdc69	2.47	0.000494
17278749	microRNA 341	Mir341	2.47	0.003965
17278751	microRNA 1188	Mir1188	2.47	0.002944
17453222	Williams-Beuren syndrome chromosome region 17 homolog (human)	Wbscr17	2.47	7e-06
17222825	nucleic acid binding protein 1	Nabp1	2.48	0.001304
17341540	tumor necrosis factor receptor superfamily, member 12a	Tnfrsf12a	2.48	0.000809
17278713	microRNA 136	Mir136	2.49	0.001356
17278755	microRNA 370	Mir370	2.49	0.002235
17313254	melanin-concentrating hormone receptor 1	Mchr1	2.49	0.000238
17381078	uridine-cytidine kinase 1-like 1, opposite strand	Uckl1os	2.49	0.000164
17436877	actin-binding LIM protein 2	Ablim2	2.49	0.001911
17459716	succinate-CoA ligase, GDP-forming, alpha subunit	Suclg1	2.49	9e-05
17497718	interferon induced transmembrane protein 3	Ifitm3	2.49	0.000294
17278785	predicted gene, 23736 [Source:MGI Symbol;Acc:MGI:5453513]	Gm23736	2.5	0.000719
17333347	superoxide dismutase 2, mitochondrial	Sod2	2.5	6.1e-05
17380199	RNA binding motif protein 38	Rbm38	2.5	0.001548
17445089	furry homolog (Drosophila)	Fry	2.5	0.001005
17472955	transmembrane and tetratricopeptide repeat containing 1	Tmtc1	2.5	0.003353
17527353	electron transferring flavoprotein, alpha polypeptide	Etfa	2.5	0.000133
17247307	von Willebrand factor C domain containing 2	Vwc2	2.51	0.015747
17278886	microRNA 409	Mir409	2.51	0.001721
17291674	myosin light chain kinase family, member 4	Mylk4	2.51	0.006914
17338743	feminization 1 homolog a (C. elegans)	Fem1a	2.51	0.001223
17468018	hexokinase 2	Hk2	2.51	0.000234
17496408	aldolase A, fructose-bisphosphate	Aldoa	2.51	0.000294
17510983			2.51	0.000759
17323299			2.52	0.000281
17265657	smoothelin-like 2	Smtnl2	2.53	0.014063
17278709	microRNA 434	Mir434	2.53	0.002709
17287022	predicted gene, 24915 [Source:MGI Symbol;Acc:MGI:5454692]	Gm24915	2.53	0.020298
17322429	protein phosphatase 1, regulatory (inhibitor) subunit 1A	Ppp1r1a	2.53	0.000107
17350378	laeverin	Lvrn	2.53	0.000971
17423781	peptidase M20 domain containing 2	Pm20d2	2.53	3.9e-05
17461477	LIM and cysteine-rich domains 1	Lmcd1	2.54	0.004011
17231611	predicted gene, 25682 [Source:MGI Symbol;Acc:MGI:5455459]	Gm25682	2.55	0.005683
17280836	leucine-rich single-pass membrane protein 1	Lsmem1	2.55	0.025077
17346001	mitichondrial ribosomal protein S36, pseudogene 1	Mrps36-ps1	2.55	2.5e-05
17407956	carbonic anhydrase 14	Car14	2.55	0.000238
17452709	hydrocarboxylic acid receptor 1	Hcar1	2.55	0.000142
17493875	purinergic receptor P2Y, G-protein coupled 2	P2ry2	2.55	6.5e-05
17231789	taxilin beta	Txlnb	2.56	0.006612
17349209	LIM and senescent cell antigen like domains 2	Lims2	2.56	0.001294
17394668	potassium voltage gated channel, Shab-related subfamily, member 1	Kcnb1	2.56	0.000153
17501217			2.56	0.001538
17523566	C-type lectin domain family 3, member b	Clec3b	2.56	0.000726
17230067	myeloid nuclear differentiation antigen like	Mndal	2.57	0.002151
17243102	junctional sarcoplasmic reticulum protein 1	Jsrp1	2.57	0.000501
17278884	microRNA 541	Mir541	2.57	0.002082
17399460	pre B cell leukemia transcription factor interacting protein 1	Pbxip1	2.57	0.001638
17331960			2.58	0.003909
17468747	kelch repeat and BTB (POZ) domain containing 12	Kbtbd12	2.58	0.002282
17476639	predicted pseudogene 5327 [Source:MGI Symbol;Acc:MGI:3647424]	Gm5327	2.58	0.00315
17382802	ubiquitin associated domain containing 1	Ubac1	2.59	0.00033
17426621	RIKEN cDNA 2310002L09 gene	2310002L09Rik	2.59	0.014746
17438419	RIKEN cDNA 2310040G07 gene [Source:MGI Symbol;Acc:MGI:1917534]	2310040G07Rik	2.59	0.002786
17211367	microRNA 133b	Mir133b	2.6	0.008024
17229269	RCSD domain containing 1	Rcsd1	2.6	0.000146
17230484	epoxide hydrolase 1, microsomal	Ephx1	2.6	0.011016
17322700	RNA binding protein, fox-1 homolog (C. elegans) 1	Rbfox1	2.6	0.000903
17401041	calsequestrin 2	Casq2	2.6	0.001197
17464713	predicted gene, 22155 [Source:MGI Symbol;Acc:MGI:5451932]	Gm22155	2.6	0.047945
17469360	leiomodin 3 (fetal)	Lmod3	2.6	0.006272
17524451	collagen, type V, alpha 3	Col5a3	2.6	0.000794
17534489	proline rich 32	Prr32	2.6	0.009967
17303964	dual specificity phosphatase 13	Dusp13	2.61	0.00051
17366953	protein kinase C, theta	Prkcq	2.61	0.004393
17449084	insulin-like growth factor binding protein 7	Igfbp7	2.61	0.002314
17465636	plexin A4	Plxna4	2.61	0.004416
17550426			2.61	0.017797
17550486			2.61	0.003715
17278846	microRNA 487b	Mir487b	2.62	0.003893
17403237	guanylate binding protein 3	Gbp3	2.62	0.004826
17243761	fatty acid binding protein 3, muscle and heart, pseudogene 1 [Source:MGI Symbol;Acc:MGI:101929]	Fabp3-ps1	2.63	0.003161
17278878	microRNA 154	Mir154	2.63	0.000294
17527532	mannose phosphate isomerase	Mpi	2.63	0.000666
17273526	Rab40B, member RAS oncogene family	Rab40b	2.64	0.023339
17315305	insulin-like growth factor binding protein 6	Igfbp6	2.64	0.001885
17432256	solute carrier family 25, member 34	Slc25a34	2.64	0.001409
17212301	transmembrane protein 182	Tmem182	2.65	0.014816
17229307	dual specificity phosphatase 27 (putative)	Dusp27	2.65	0.012967
17243113	leucine rich repeat and Ig domain containing 3	Lingo3	2.65	0.000218
17302429	LIM domain only 7	Lmo7	2.65	0.006116
17253175	tumor suppressor candidate 5	Tusc5	2.66	0.00589
17319619	NADH dehydrogenase (ubiquinone) 1 alpha subcomplex, 6 (B14)	Ndufa6	2.66	4.5e-05
17324446	receptor transporter protein 4	Rtp4	2.66	0.002003
17432808	mitofusin 2	Mfn2	2.66	0.000362
17252767	clustered mitochondria (cluA/CLU1) homolog	Cluh	2.67	0.004234
17288616	tubulin polymerization promoting protein	Tppp	2.67	0.003434
17364484	sorbin and SH3 domain containing 1	Sorbs1	2.67	0.000397
17477116	electron transferring flavoprotein, beta polypeptide	Etfb	2.67	0.000153
17483242	myosin light chain, phosphorylatable, fast skeletal muscle	Mylpf	2.67	0.003267
17278704	RIKEN cDNA 6430411K18 gen; microRNA 127; microRNA 433	6430411K18Rik	2.68	0.002494
17378799	predicted gene 20412 [Source:MGI Symbol;Acc:MGI:5141877]	Gm20412	2.68	0.000412
17457143	aldo-keto reductase family 1, member B10 (aldose reductase)	Akr1b10	2.68	0.002065
17513995	actin, alpha 1, skeletal muscle	Acta1	2.68	0.002899
17229948	dual specificity phosphatase 23	Dusp23	2.7	0.000518
17278753	predicted gene, 23912 [Source:MGI Symbol;Acc:MGI:5453689]	Gm23912	2.7	0.000657
17281084	egl-9 family hypoxia-inducible factor 3	Egln3	2.7	0.000551
17278700	microRNA 3070b	Mir3070b	2.71	0.008947
17380211	CCCTC-binding factor (zinc finger protein)-like, opposite strand; predicted gene, 40011	Ctcflos	2.71	0.003604
17442909	glioblastoma amplified sequence	Gbas	2.71	0.005382
17278836	microRNA 654	Mir654	2.72	0.010499
17306696	ER membrane protein complex subunit 9	Emc9	2.72	0.000372
17483568	tripartite motif-containing 72	Trim72	2.72	0.004631
17523359	kelch-like 40	Klhl40	2.72	0.002089
17278698	microRNA 3070a	Mir3070a	2.73	0.00236
17390079	phospholipase A2, group IVE	Pla2g4e	2.73	0.000546
17372255	predicted gene 13938 [Source:MGI Symbol;Acc:MGI:3651046]	Gm13938	2.74	0.00099
17238605	integrin alpha 7	Itga7	2.75	0.004707
17278840	microRNA 376a	Mir376a	2.75	0.007332
17420777	aldehyde dehydrogenase 4 family, member A1	Aldh4a1	2.75	0.001519
17225811	predicted gene, 23181 [Source:MGI Symbol;Acc:MGI:5452958]	Gm23181	2.76	0.011159
17248896	tripartite motif-containing 7	Trim7	2.76	0.000701
17250500	mitochondrial elongation factor 2	Mief2	2.77	5.4e-05
17456772	striatin interacting protein 2	Strip2	2.77	0.017728
17509976	solute carrier family 25, member 42	Slc25a42	2.77	0.004814
17278702	microRNA 431	Mir431	2.78	0.006258
17292562	sema domain, immunoglobulin domain (Ig), transmembrane domain (TM) and short cytoplasmic domain, (semaphorin) 4D	Sema4d	2.78	0.001042
17392690	acyl-CoA synthetase short-chain family member 1	Acss1	2.78	0.000579
17403039	uncharacterized LOC102634333	LOC102634333	2.78	0.005547
17479259	ATP/GTP binding protein-like 1	Agbl1	2.78	0.005169
17238054	NADH dehydrogenase (ubiquinone) 1 alpha subcomplex, 4-like 2	Ndufa4l2	2.79	0.016942
17313394	aconitase 2, mitochondrial	Aco2	2.79	0.000196
17479628	alpha-kinase 3	Alpk3	2.79	0.002611
17214487	SPEG complex locus	Speg	2.81	3.7e-05
17231248	G0/G1 switch gene 2	G0s2	2.81	0.000476
17236227	5-nucleotidase domain containing 3	Nt5dc3	2.81	0.001001
17367385	OTU domain containing 1	Otud1	2.82	0.001189
17463501	C-type lectin domain family 2, member d	Clec2d	2.82	0.000323
17468501	RIKEN cDNA 2310040G24 gene	2310040G24Rik	2.82	3.3e-05
17517112			2.82	0.001932
17244506	mitochondrial ribosomal protein L42	Mrpl42	2.83	0.000131
17278830	microRNA 495	Mir495	2.83	0.008881
17300544	fat storage-inducing transmembrane protein 1	Fitm1	2.83	0.000804
17326394	filamin A interacting protein 1-like	Filip1l	2.83	0.003088
17528247	kelch repeat and BTB (POZ) domain containing 13	Kbtbd13	2.83	8e-06
17550428			2.83	0.020332
17326567	glucan (1,4-alpha-), branching enzyme 1	Gbe1	2.84	0.001221
17278696	microRNA 665	Mir665	2.85	0.005635
17278803	microRNA 379	Mir379	2.85	0.000366
17233930	catenin (cadherin associated protein), alpha 3	Ctnna3	2.86	0.000553
17307837	epoxide hydrolase 2, cytoplasmic	Ephx2	2.88	0.00191
17364932	glutamic-oxaloacetic transaminase 1, soluble	Got1	2.88	0.001698
17517132	crystallin, alpha B	Cryab	2.89	0.013952
17285851	histone cluster 1, H2bc	Hist1h2bc	2.9	8.8e-05
17264306	RIKEN cDNA 2310065F04 gene	2310065F04Rik	2.91	0.000722
17441037	2-5 oligoadenylate synthetase-like 2	Oasl2	2.91	0.001093
17302869	citrate lyase beta like	Clybl	2.92	0.00011
17519438	myosin VC	Myo5c	2.92	0.001238
17413191	DnaJ (Hsp40) homolog, subfamily B, member 5	Dnajb5	2.93	0.000459
17253215	solute carrier family 6 (neurotransmitter transporter, serotonin), member 4	Slc6a4	2.94	0.000879
17278688	microRNA 673	Mir673	2.94	0.0036
17443069	GATS protein-like 2	Gatsl2	2.94	0.000215
17235018	complement factor D (adipsin)	Cfd	2.95	0.013705
17259078	ring finger protein 213	Rnf213	2.95	0.005364
17303882	synaptopodin 2-like	Synpo2l	2.95	0.001223
17342029	NADH dehydrogenase (ubiquinone) 1 beta subcomplex, 10	Ndufb10	2.95	0.000575
17504146	coenzyme Q9 homolog (yeast)	Coq9	2.95	5.2e-05
17548750			2.95	0.005255
17227160	protein phosphatase 1, regulatory (inhibitor) subunit 12B	Ppp1r12b	2.97	0.000946
17346136	perilipin 5	Plin5	2.97	0.000148
17421867	G protein-coupled receptor 157	Gpr157	2.97	0.000479
17278860	miRNA containing gene; microRNA 410; microRNA 412; microRNA 369	Mirg	2.98	0.001161
17334253	enoyl-Coenzyme A delta isomerase 1	Eci1	2.98	0.000466
17406423	glycosyltransferase 28 domain containing 2; family with sequence similarity 160, member A1; ADP-ribosylation factor interacting protein 1	Glt28d2	3	0.004121
17439741	AF4/FMR2 family, member 1	Aff1	3	0.000203
17411323	acyl-Coenzyme A dehydrogenase, medium chain	Acadm	3.01	0.000121
17286973	guanosine monophosphate reductase	Gmpr	3.02	0.000527
17357072	phospholipase A2, group XVI	Pla2g16	3.02	0.001746
17420064	transcription elongation factor A (SII), 3	Tcea3	3.02	0.001745
17501228			3.02	0.007473
17407829	ADAMTS-like 4	Adamtsl4	3.03	0.000507
17350921	RIKEN cDNA F830016B08 gene	F830016B08Rik	3.04	0.003809
17394015	junctophilin 2	Jph2	3.04	0.001486
17521314	RIKEN cDNA 6430571L13 gene	6430571L13Rik	3.04	0.000144
17225379	ankyrin repeat and SOCS box-containing 18	Asb18	3.05	0.002565
17257651	predicted gene 11716	Gm11716	3.05	0.000233
17268691	calcium channel, voltage-dependent, beta 1 subunit	Cacnb1	3.05	0.000773
17284170	RIKEN cDNA 2010107E04 gene	2010107E04Rik	3.05	3.4e-05
17307446	sarcoglycan, gamma (dystrophin-associated glycoprotein)	Sgcg	3.05	0.002141
17334091	host cell factor C1 regulator 1 (XPO1-dependent)	Hcfc1r1	3.05	0.000328
17461414	basic helix-loop-helix family, member e40	Bhlhe40	3.06	0.000184
17480729	uncoupling protein 3 (mitochondrial, proton carrier)	Ucp3	3.06	0.001352
17548748	uncharacterized LOC105243404	LOC105243404	3.06	0.000337
17535572	ATPase, Ca++ transporting, plasma membrane 3	Atp2b3	3.07	0.000688
17249980	interferon gamma induced GTPase	Igtp	3.08	0.027024
17396765	ubiquitin specific peptidase 13 (isopeptidase T-3)	Usp13	3.08	0.000357
17462954	splA/ryanodine receptor domain and SOCS box containing 2	Spsb2	3.08	0.003146
17354739	peroxisome proliferative activated receptor, gamma, coactivator 1 beta	Ppargc1b	3.09	3.6e-05
17364192	RIKEN cDNA 1500017E21 gene	1500017E21Rik	3.09	0.006561
17369379	hemicentin 2	Hmcn2	3.09	0.00108
17474547	reticulon 2 (Z-band associated protein)	Rtn2	3.09	0.001561
17278747			3.1	0.006671
17453055	RIKEN cDNA 5930412G12 gene	5930412G12Rik	3.1	0.007396
17409753	amylo-1,6-glucosidase, 4-alpha-glucanotransferase	Agl	3.11	0.004435
17312396	cytochrome c-1	Cyc1	3.12	0.000402
17522439	myosin, light polypeptide 3	Myl3	3.12	0.019358
17539110	small muscle protein, X-linked	Smpx	3.13	0.007407
17339395	myomesin 1	Myom1	3.14	0.009348
17410275	epidermal growth factor	Egf	3.14	0.000855
17242839			3.15	0.001952
17314476	transmembrane protein 117	Tmem117	3.15	0.024008
17278844	microRNA 381	Mir381	3.16	0.001953
17357004	MACRO domain containing 1	Macrod1	3.17	2.3e-05
17403070	alcohol dehydrogenase 1 (class I); predicted gene, 40156	Adh1	3.17	0.00087
17437765	klotho beta	Klb	3.17	0.000262
17461942	peroxisome proliferator activated receptor gamma	Pparg	3.17	0.006878
17278806	microRNA 411	Mir411	3.18	0.000558
17283958	retrotransposon-like 1; microRNA 3071	Rtl1	3.18	0.000107
17457913	chloride channel, voltage-sensitive 1	Clcn1	3.18	9.8e-05
17506042	cadherin 13	Cdh13	3.18	0.000337
17532540	FYVE and coiled-coil domain containing 1; predicted gene 17021	Fyco1	3.18	6.7e-05
17278690	microRNA 493	Mir493	3.19	0.000682
17397297	RIKEN cDNA 3110057O12 gene	3110057O12Rik	3.19	0.000796
17261865	cyclin G1	Ccng1	3.2	0.001754
17501214			3.2	0.012114
17536078	dystrophin, muscular dystrophy	Dmd	3.2	0.00183
17373240	protein kinase C and casein kinase substrate in neurons 3	Pacsin3	3.21	0.002946
17278694	microRNA 540	Mir540	3.22	0.012359
17325592	popeye domain containing 2	Popdc2	3.22	0.004491
17530923	leucine-rich single-pass membrane protein 2	Lsmem2	3.22	0.00095
17273159	protein phosphatase 1, regulatory subunit 27	Ppp1r27	3.23	0.002331
17459038	hect domain and RLD 3	Herc3	3.23	0.009193
17517727	cytochrome c oxidase subunit Va	Cox5a	3.23	3e-05
17278200	interferon, alpha-inducible protein 27	Ifi27	3.24	0.003858
17318403	predicted gene, 25720 [Source:MGI Symbol;Acc:MGI:5455497]	Gm25720	3.25	0.019541
17413770	tropomodulin 1	Tmod1	3.26	0.005088
17481057	ADP-ribosyltransferase 1	Art1	3.26	0.00062
17445238	klotho	Kl	3.27	0.002173
17243910	myosin binding protein C, slow-type	Mybpc1	3.29	0.004216
17263223	obscurin, cytoskeletal calmodulin and titin-interacting RhoGEF	Obscn	3.29	0.000173
17494662	GTPase, very large interferon inducible 1 pseudogene; predicted gene 4070	Gm18853	3.3	0.001589
17519573	kelch-like 31	Klhl31	3.31	0.00183
17410022	myozenin 2	Myoz2	3.32	0.001637
17477774	histidine rich calcium binding protein	Hrc	3.32	0.0002
17490848	dihydrodiol dehydrogenase (dimeric)	Dhdh	3.32	0.001264
17502462	transmembrane protein 38A	Tmem38a	3.32	0.000244
17233303			3.33	0.006796
17375045	calpain 3	Capn3	3.33	0.003753
17268107	sarcoglycan, alpha (dystrophin-associated glycoprotein)	Sgca	3.34	0.00092
17317153	syntrophin, basic 1	Sntb1	3.37	0.008306
17421764			3.37	0.018424
17448449	predicted gene 15949 [Source:MGI Symbol;Acc:MGI:3801730]	Gm15949	3.38	0.002085
17232763	D-aspartate oxidase	Ddo	3.39	5.4e-05
17351952	ST8 alpha-N-acetyl-neuraminide alpha-2,8-sialyltransferase 5	St8sia5	3.39	0.000788
17443185	MLX interacting protein-like	Mlxipl	3.39	0.008809
17477946	MEF2 activating motif and SAP domain containing transcriptional regulator	Mamstr	3.39	0.000616
17280144	potassium voltage-gated channel, subfamily F, member 1	Kcnf1	3.4	0.000869
17487242	RIKEN cDNA A930016O22 gene	A930016O22Rik	3.4	6.9e-05
17420154	wingless-type MMTV integration site family, member 4	Wnt4	3.41	0.008824
17265096	solute carrier family 2 (facilitated glucose transporter), member 4	Slc2a4	3.42	0.000228
17491368	cysteine and glycine-rich protein 3	Csrp3	3.43	0.007277
17224540	tubulin, alpha 4A	Tuba4a	3.44	0.001039
17549594			3.44	0.000782
17214476	desmin	Des	3.45	0.001079
17224125	melanoregulin	Mreg	3.48	0.000269
17249990	immunity-related GTPase family M member 2	Irgm2	3.48	0.006027
17383886	RIKEN cDNA 1110008P14 gene	1110008P14Rik	3.48	0.001578
17509775			3.48	0.001364
17342483	family with sequence similarity 195, member A	Fam195a	3.49	3.8e-05
17217678	calcium channel, voltage-dependent, L type, alpha 1S subunit	Cacna1s	3.51	0.000509
17476456	heat shock protein, alpha-crystallin-related, B6	Hspb6	3.51	0.001065
17424105	aquaporin 7	Aqp7	3.52	0.000883
17494649	GTPase, very large interferon inducible 1 pseudogene; predicted gene 4070	Gm17757	3.52	0.008816
17291694	serine (or cysteine) peptidase inhibitor, clade B, member 1a	Serpinb1a	3.55	0.00052
17352695	microRNA 1a-2	Mir1a-2	3.56	0.007844
17255458	phosphatase, orphan 1; zinc finger protein 652	Phospho1	3.57	0.010338
17278838	microRNA 376b	Mir376b	3.57	0.008804
17522634	RIKEN cDNA 2310075C17 gene	2310075C17Rik	3.57	5e-05
17538096	ring finger protein 128	Rnf128	3.57	0.007374
17315482	predicted gene 4544	Gm4544	3.58	3.6e-05
17211004	alcohol dehydrogenase, iron containing, 1	Adhfe1	3.59	0.001399
17313705	parvin, beta	Parvb	3.59	0.000108
17326987	melanocortin 2 receptor accessory protein	Mrap	3.61	0.004527
17517390	isocitrate dehydrogenase 3 (NAD+) alpha	Idh3a	3.61	0.000608
17235597	ataxia, cerebellar, Cayman type homolog (human), opposite strand	Atcayos	3.62	0.000531
17259534	solute carrier family 16 (monocarboxylic acid transporters), member 3	Slc16a3	3.64	0.000423
17358214	Kruppel-like factor 9	Klf9	3.64	8e-06
17371939			3.64	0.000307
17251133	myosin, heavy polypeptide 8, skeletal muscle, perinatal	Myh8	3.65	0.00218
17389339	ryanodine receptor 3	Ryr3	3.66	0.000955
17265129	acyl-Coenzyme A dehydrogenase, very long chain	Acadvl	3.67	9.6e-05
17461489	caveolin 3	Cav3	3.67	0.006804
17436043	tripartite motif-containing 54	Trim54	3.69	0.003265
17337228	immediate early response 3	Ier3	3.7	0.000502
17463670			3.7	0.008193
17394267	troponin C2, fast	Tnnc2	3.71	0.00052
17406403	family with sequence similarity 160, member A1	Fam160a1	3.71	7.2e-05
17491354	MAS-related GPR, member B1	Mrgprb1	3.73	0.002917
17270848	sodium channel, voltage-gated, type IV, alpha	Scn4a	3.74	4.2e-05
17498115	proline rich 33	Prr33	3.74	2.8e-05
17222668	methyltransferase like 21C	Mettl21c	3.76	0.000152
17273253	myeloid-associated differentiation marker-like 2	Myadml2	3.76	0.000373
17257444	angiotensin I converting enzyme (peptidyl-dipeptidase A) 1	Ace	3.77	0.001384
17378348	transformation related protein 53 inducible nuclear protein 2	Trp53inp2	3.77	0.000173
17485246	troponin T3, skeletal, fast	Tnnt3	3.77	0.003998
17251264	dehydrogenase/reductase (SDR family) member 7C	Dhrs7c	3.78	0.000555
17221502	junctophilin 1	Jph1	3.8	0.000383
17325686	zinc finger and BTB domain containing 20	Zbtb20	3.8	0.00024
17501224			3.8	0.008545
17536759	integrin beta 1 binding protein 2	Itgb1bp2	3.8	0.002351
17215750	kelch-like 30	Klhl30	3.83	0.000852
17481087	stromal interaction molecule 1	Stim1	3.85	1.3e-05
17492406	perilipin 1	Plin1	3.86	0.00084
17448106	sel-1 suppressor of lin-12-like 3 (C. elegans)	Sel1l3	3.92	0.000944
17534646	Rho GTPase activating protein 36	Arhgap36	3.93	0.020504
17278692	microRNA 337	Mir337	3.94	0.006112
17233104	blood vessel epicardial substance	Bves	3.95	0.001941
17451251	myosin XVIIIb	Myo18b	3.96	0.000299
17352693	microRNA 133a-1	Mir133a-1	3.97	0.001536
17345797	apolipoprotein B mRNA editing enzyme, catalytic polypeptide 2	Apobec2	3.98	0.008189
17456414	ankyrin repeat and SOCS box-containing 15	Asb15	3.99	0.00129
17283516	ankyrin repeat and SOCS box-containing 2	Asb2	4.01	0.00066
17352862	aquaporin 4	Aqp4	4.01	2.9e-05
17501220			4.01	0.005502
17501222			4.01	0.005502
17548228	CDGSH iron sulfur domain 3B; CDGSH iron sulfur domain 3	Cisd3b	4.01	2.4e-05
17363559	family with sequence similarity 189, member A2	Fam189a2	4.02	0.000144
17280062	lipin 1	Lpin1	4.03	0.001191
17231349	protein phosphatase 1, regulatory (inhibitor) subunit 14c	Ppp1r14c	4.05	0.004864
17227311	shisa family member 4	Shisa4	4.06	1e-05
17522536	leucine rich repeat containing 2	Lrrc2	4.07	0.000109
17246100	coenzyme Q10 homolog A (yeast)	Coq10a	4.12	5.2e-05
17402039	leucine rich repeat containing 39	Lrrc39	4.12	0.004551
17383633	carnitine acetyltransferase	Crat	4.13	3e-06
17386396	solute carrier family 25 (mitochondrial carrier, Aralar), member 12	Slc25a12	4.14	0.002487
17499485	myomesin 2	Myom2	4.14	0.002342
17289132	RIKEN cDNA A630019I02 gene	A630019I02Rik	4.16	1.3e-05
17256697	amine oxidase, copper containing 3	Aoc3	4.18	0.001038
17503942	metallothionein 1	Mt1	4.18	0.000434
17256870	CD300 antigen like family member G	Cd300lg	4.19	0.002663
17501211			4.19	0.002528
17489464	sodium channel, voltage-gated, type I, beta	Scn1b	4.2	0.000512
17304901	RIKEN cDNA 3425401B19 gene	3425401B19Rik	4.22	0.000462
17316775	actin-binding Rho activating protein	Abra	4.24	0.000736
17314773	RIKEN cDNA 1700120C14 gene	1700120C14Rik	4.25	0.028955
17241553	myopalladin	Mypn	4.29	0.000715
17260261	calcium/calmodulin-dependent protein kinase II, beta	Camk2b	4.29	0.000158
17401142			4.29	0.000937
17233095	popeye domain containing 3	Popdc3	4.32	0.000485
17380757	predicted gene 6307	Gm6307	4.33	0.005214
17427746	protein kinase, AMP-activated, alpha 2 catalytic subunit	Prkaa2	4.34	0.005043
17507573	ADP-ribosylhydrolase like 1	Adprhl1	4.35	0.000694
17439131	starch binding domain 1	Stbd1	4.38	0.000512
17408211	phosphodiesterase 4D interacting protein (myomegalin); microRNA 7225	Pde4dip	4.42	3.2e-05
17314577	phosphofructokinase, muscle	Pfkm	4.44	0.001577
17441453	nitric oxide synthase 1, neuronal	Nos1	4.44	0.00206
17414032	muscle-related coiled-coil protein	Murc	4.48	0.003203
17541525	olfactory receptor 1321	Olfr1321	4.48	0.001313
17516469	ubiquitin specific peptidase 2	Usp2	4.49	0.000895
17409261	synaptophysin-like 2	Sypl2	4.59	0.000335
17378359	acyl-CoA synthetase short-chain family member 2; predicted gene, 39969	Acss2	4.6	0.000112
17305070	LIM domain binding 3	Ldb3	4.62	0.001744
17443342	heat shock protein 1	Hspb1	4.64	0.002346
17264792	ATPase, Na+/K+ transporting, beta 2 polypeptide	Atp1b2	4.65	8.5e-05
17325723	microRNA 568; zinc finger and BTB domain containing 20	Mir568	4.65	0.00018
17284049	ankyrin repeat domain 9	Ankrd9	4.66	3.8e-05
17424243	expressed sequence AI464131	AI464131	4.69	0.000299
17278834	microRNA 376c	Mir376c	4.7	0.000509
17489420	FXYD domain-containing ion transport regulator 1	Fxyd1	4.7	0.00038
17532264	xin actin-binding repeat containing 1	Xirp1	4.71	0.000464
17282025	spectrin beta, erythrocytic	Sptb	4.77	0.001401
17448001	peroxisome proliferative activated receptor, gamma, coactivator 1 alpha	Ppargc1a	4.81	2.3e-05
17279349	adenylosuccinate synthetase like 1	Adssl1	4.82	0.001987
17252183	enolase 3, beta muscle	Eno3	4.85	0.000804
17317278	kelch-like 38	Klhl38	4.85	0.005169
17324404	adiponectin, C1Q and collagen domain containing	Adipoq	4.86	0.001845
17244732	myogenic factor 6	Myf6	4.87	0.003836
17517360	sarcolipin	Sln	4.87	0.003523
17496857	cytochrome c oxidase subunit VIa polypeptide 2	Cox6a2	4.88	0.0009
17327502	SH3-binding domain glutamic acid-rich protein	Sh3bgr	4.89	0.001607
17362342	lectin, galactose binding, soluble 12	Lgals12	4.91	0.002662
17294397	leucine rich repeat containing 14B	Lrrc14b	4.92	0.000314
17348902	dystrobrevin alpha	Dtna	4.94	0.000806
17268884	nuclear receptor subfamily 1, group D, member 1	Nr1d1	4.96	0.000841
17393131	syntrophin, acidic 1	Snta1	4.96	1.6e-05
17415815	phosphoglucomutase 2	Pgm2	4.96	6e-05
17334666	tryptase beta 2	Tpsb2	4.97	0.000488
17500996	acyl-CoA synthetase long-chain family member 1	Acsl1	4.97	0.000199
17532367	hedgehog acyltransferase-like	Hhatl	5.01	0.000426
17222193	ankyrin repeat domain 23	Ankrd23	5.04	0.000628
17229121	methyltransferase like 11B	Mettl11b	5.05	0.005231
17336681	tenascin XB	Tnxb	5.05	0.000539
17380764	microRNA 133a-2	Mir133a-2	5.05	0.001371
17451816	heat shock protein 8	Hspb8	5.05	0.002079
17255987	titin-cap	Tcap	5.06	2.9e-05
17420874	peptidyl arginine deiminase, type II	Padi2	5.1	0.001426
17293547	fructose bisphosphatase 2	Fbp2	5.11	0.005958
17501633	lipoprotein lipase	Lpl	5.17	3e-06
17298126	leucine-rich repeats and transmembrane domains 1	Lrtm1	5.25	0.002622
17496211	ATPase, Ca++ transporting, cardiac muscle, fast twitch 1	Atp2a1	5.26	0.000819
17501226			5.28	0.003016
17229891	ATPase, Na+/K+ transporting, alpha 2 polypeptide	Atp1a2	5.29	6e-06
17351811	acetyl-Coenzyme A acyltransferase 2 (mitochondrial 3-oxoacyl-Coenzyme A thiolase)	Acaa2	5.29	1.8e-05
17352036	proline-serine-threonine phosphatase-interacting protein 2	Pstpip2	5.3	0.000326
17260192	phosphoglycerate mutase 2	Pgam2	5.31	0.000963
17268120	pyruvate dehydrogenase kinase, isoenzyme 2	Pdk2	5.34	2e-06
17346528	complement component 3	C3	5.35	0.003193
17350267	myotilin	Myot	5.4	0.00051
17534337	ATPase, (Na+)/K+ transporting, beta 4 polypeptide	Atp1b4	5.42	0.00245
17265326	predicted gene 12319 [Source:MGI Symbol;Acc:MGI:3649749]	Gm12319	5.43	6.5e-05
17464943	protein phosphatase 1, regulatory (inhibitor) subunit 3A	Ppp1r3a	5.48	0.001156
17334406	ribosomal protein L3-like	Rpl3l	5.51	3e-05
17456428	leiomodin 2 (cardiac)	Lmod2	5.56	0.00026
17401126	adenosine monophosphate deaminase 1	Ampd1	5.63	0.003078
17393789	transglutaminase 2, C polypeptide	Tgm2	5.66	0.000169
17498722	resistin	Retn	5.66	0.007606
17397320	La ribonucleoprotein domain family, member 1B	Larp1b	5.71	0.000637
17474631			5.8	0.009214
17526707	zinc finger and BTB domain containing 16	Zbtb16	5.82	0.000765
17539560	ankyrin repeat and SOCS box-containing 11	Asb11	5.82	0.000654
17397331	predicted gene, 22043 [Source:MGI Symbol;Acc:MGI:5451820]	Gm22043	5.87	0.000345
17506137	WAP four-disulfide core domain 1	Wfdc1	5.96	0.000715
17502951	uncharacterized LOC105246804	LOC105246804	6.09	0.00163
17365803	nebulin-related anchoring protein	Nrap	6.1	0.000668
17503937	metallothionein 2	Mt2	6.1	0.000767
17310637	family with sequence similarity 134, member B	Fam134b	6.12	1.9e-05
17253258	coronin 6	Coro6	6.13	0.001252
17342699	inositol hexaphosphate kinase 3	Ip6k3	6.23	7e-06
17464654	pyruvate dehydrogenase kinase, isoenzyme 4	Pdk4	6.27	0.000105
17214269	phospholipase C, delta 4	Plcd4	6.28	1.3e-05
17313862	peroxisome proliferator activated receptor alpha	Ppara	6.41	5.3e-05
17448535	Yip1 domain family, member 7	Yipf7	6.56	0.000946
17310816	carboxymethylenebutenolidase-like (Pseudomonas)	Cmbl	6.57	0.000318
17262942	solute carrier family 36 (proton/amino acid symporter), member 2	Slc36a2	6.58	0.000227
17451785	transmembrane protein 233	Tmem233	6.58	9.3e-05
17356874	muscle glycogen phosphorylase	Pygm	6.62	0.001431
17271143	calcium channel, voltage-dependent, gamma subunit 1	Cacng1	6.67	0.001995
17230408	aarF domain containing kinase 3	Adck3	6.81	4e-05
17318083	lymphocyte antigen 6 complex, locus A	Ly6a	6.81	0.00026
17439094	ADP-ribosyltransferase 3	Art3	6.81	3e-06
17337852	chloride intracellular channel 5	Clic5	6.84	0.000204
17497704	cytochrome c oxidase subunit VIIIb	Cox8b	6.93	0.000283
17232453	triadin	Trdn	6.98	0.001027
17380762	microRNA 1a-1	Mir1a-1	7.01	0.005578
17406421	family with sequence similarity 160, member A1; ADP-ribosylation factor interacting protein 1	Fam160a1	7.01	0.003624
17485215	troponin I, skeletal, fast 2	Tnni2	7.11	0.000873
17440826	acetyl-Coenzyme A carboxylase beta	Acacb	7.13	0.00089
17276934	tetratricopeptide repeat domain 9	Ttc9	7.16	0.00144
17541528	immunoglobulin superfamily, member 1	Igsf1	7.28	0.000682
17251046	myosin, heavy polypeptide 1, skeletal muscle, adult	Myh1	7.44	9.8e-05
17492810	fibronectin type III and SPRY domain containing 2	Fsd2	7.45	0.002051
17361362	actinin alpha 3	Actn3	7.55	2e-06
17318942	parvalbumin	Pvalb	7.99	0.000763
17469754	cell death-inducing DFFA-like effector c	Cidec	7.99	0.000544
17493685	predicted gene 4980	Gm4980	8.01	5.3e-05
17484909	patatin-like phospholipase domain containing 2	Pnpla2	8.03	0.001271
17400231	tropomodulin 4	Tmod4	8.04	0.000181
17264330			8.27	0.000111
17229851	calsequestrin 1	Casq1	8.39	0.000876
17377816	myosin, light polypeptide kinase 2, skeletal muscle	Mylk2	8.81	0.000123
17404091	fatty acid binding protein 4, adipocyte	Fabp4	8.96	0.000258
17380222	phosphoenolpyruvate carboxykinase 1, cytosolic	Pck1	9.29	0.001742
17346125	perilipin 4	Plin4	9.47	0.001743
17306147	N-myc downstream regulated gene 2	Ndrg2	9.6	5e-06
17421074	heat shock protein family, member 7 (cardiovascular)	Hspb7	9.82	0.001099
17474621	creatine kinase, muscle	Ckm	9.84	0.002344
17294959	cardiomyopathy associated 5	Cmya5	9.85	0.000698
17212286	solute carrier family 9 (sodium/hydrogen exchanger), member 2	Slc9a2	10.26	0.000135
17396152	carbonic anhydrase 3	Car3	10.41	0.004139
17251001	myosin, heavy polypeptide 2, skeletal muscle, adult	Myh2	10.58	1.1e-05
17453140	phosphorylase kinase gamma 1	Phkg1	11.06	0.000293
17320499	choline kinase beta; carnitine palmitoyltransferase 1b, muscle; Chkb-Cpt1b readthrough transcript (NMD candidate)	Chkb	11.15	0.000966
17501204			11.21	0.001842
17422907	PPARGC1 and ESRR induced regulator, muscle 1	Perm1	11.62	0.000211
17387528	smoothelin-like 1	Smtnl1	13.07	5.6e-05
17251091	myosin, heavy polypeptide 4, skeletal muscle	Myh4	13.72	0.000107
17477322	kallikrein 1-related petidase b26	Klk1b26	13.73	0.003716
17306960	mast cell protease 4	Mcpt4	13.95	0.000686
17501170	ankyrin repeat and SOCs box-containing 5	Asb5	14.17	5e-05
17404191			14.26	0.00104
17493432	thyroid hormone responsive	Thrsp	14.34	0.000245
17398139	myeloid leukemia factor 1	Mlf1	14.53	0.000172
17303874	myozenin 1	Myoz1	14.54	0.001626
17351457	cell death-inducing DNA fragmentation factor, alpha subunit-like effector A	Cidea	16.3	0.000575
17395766	eukaryotic translation elongation factor 1 alpha 2	Eef1a2	16.41	1.55e-07
17476288	cytochrome c oxidase subunit VIIa 1	Cox7a1	16.57	0.000189
17234436	coiled-coil-helix-coiled-coil-helix domain containing 10	Chchd10	18.56	0.000227
17528947	muscular LMNA-interacting protein	Mlip	19.7	0.000128
17371296	xin actin-binding repeat containing 2	Xirp2	22.84	6.4e-05
17314888	glycerol-3-phosphate dehydrogenase 1 (soluble)	Gpd1	27.87	1.7e-05
17543315	ankyrin repeat and SOCS box-containing 12	Asb12	29.16	8e-06
17294816	creatine kinase, mitochondrial 2	Ckmt2	30.86	0.000618
17222707	methyltransferase like 21E	Mettl21e	31.53	0.000209
17490245	myosin binding protein C, fast-type	Mybpc2	50.96	4e-07
17502899	uncoupling protein 1 (mitochondrial, proton carrier)	Ucp1	51.6	0.000198

## Sheet: RYR-- E18.5 vs E14.5
DEGs detected in RYR1-/- E18.5 vs. E14.5
Transcript Cluster ID	Description	Gene Symbol	Fold Change (linear) (homoRYR18.5 vs. homoRYR14.5)	ANOVA p-value (homoRYR18.5 vs. homoRYR14.5)
17308928	leukocyte cell derived chemotaxin 1	Lect1	-16.83	0.007823
17494246	hemoglobin Y, beta-like embryonic chain	Hbb-y	-11.35	0.000522
17289009	hyaluronan and proteoglycan link protein 1	Hapln1	-8.8	0.023148
17211458	collagen, type IX, alpha 1	Col9a1	-8.63	0.01903
17321094	collagen, type II, alpha 1	Col2a1	-7.48	0.034465
17419305	matrilin 1, cartilage matrix protein	Matn1	-7.08	0.047821
17508591	small nucleolar RNA, C/D box 13	Snord13	-6.19	0.033108
17247852	B cell CLL/lymphoma 11A (zinc finger protein)	Bcl11a	-4.47	0.000366
17484710	beta-1,4-N-acetyl-galactosaminyl transferase 4	B4galnt4	-4.42	0.000272
17439367	chemokine (C-X-C motif) ligand 13	Cxcl13	-4.3	0.023803
17398895	cellular retinoic acid binding protein II	Crabp2	-4.19	0.001853
17505124	cadherin 3	Cdh3	-4.13	0.000827
17470561	ribosomal modification protein rimK-like family member B	Rimklb	-4.1	0.000418
17423395	solute carrier family 26, member 7	Slc26a7	-4.03	0.001344
17403185	unc-5 homolog C (C. elegans)	Unc5c	-3.87	0.001729
17437043	cytokine-like 1	Cytl1	-3.86	0.009474
17464706	distal-less homeobox 5	Dlx5	-3.85	0.019946
17546762	midline 1	Mid1	-3.63	0.044358
17544691	brain expressed X-linked 2	Bex2	-3.61	0.008674
17323828	UDP-GlcNAc:betaGal beta-1,3-N-acetylglucosaminyltransferase 5	B3gnt5	-3.58	0.000589
17496947	fibroblast growth factor receptor 2	Fgfr2	-3.52	0.025609
17365960	glial cell line derived neurotrophic factor family receptor alpha 1	Gfra1	-3.5	0.00031
17546055	EGF-like-domain, multiple 6	Egfl6	-3.42	0.000246
17389467	gremlin 1	Grem1	-3.38	0.000584
17360863	RIKEN cDNA E330013P04 gene	E330013P04Rik	-3.36	0.012946
17389608	Meis homeobox 2	Meis2	-3.32	0.011207
17277788	fibronectin leucine rich transmembrane protein 2	Flrt2	-3.31	0.001031
17430645	Na+/K+ transporting ATPase interacting 1	Nkain1	-3.24	7.5e-05
17529307	elongation of very long chain fatty acids (FEN1/Elo2, SUR4/Elo3, yeast)-like 4	Elovl4	-3.23	0.001587
17456308	potassium voltage-gated channel, Shal-related family, member 2	Kcnd2	-3.17	0.002039
17273973	matrilin 3	Matn3	-3.15	0.047205
17364917	heparanase 2	Hpse2	-3.14	0.000315
17341595	kringle containing transmembrane protein 2	Kremen2	-3.12	0.000614
17434742	sema domain, immunoglobulin domain (Ig), short basic domain, secreted, (semaphorin) 3D	Sema3d	-3.11	0.001252
17234030	transmembrane protein 26	Tmem26	-3.09	0.001121
17402698	dickkopf homolog 2 (Xenopus laevis)	Dkk2	-3.07	0.00129
17283871	B cell leukemia/lymphoma 11B	Bcl11b	-3.06	0.035936
17236821	epiphycan	Epyc	-3.04	0.049648
17448614	corin	Corin	-3.02	2.5e-05
17268255	insulin-like growth factor 2 mRNA binding protein 1; microRNA 3063	Igf2bp1	-3	0.000519
17328610	RIKEN cDNA 2610318N02 gene	2610318N02Rik	-3	0.007069
17412296	Eph receptor A7	Epha7	-2.99	0.00065
17219997	kinesin family member 26B	Kif26b	-2.95	0.000928
17502789	glycophorin A	Gypa	-2.95	0.008912
17534673	serine/threonine kinase 26	Stk26	-2.93	6.9e-05
17428659	nuclear autoantigenic sperm protein (histone-binding)	Nasp	-2.92	0.000122
17441610	T-box 5	Tbx5	-2.92	0.000668
17397377	protocadherin 10	Pcdh10	-2.89	0.00041
17478476	growth arrest specific 2	Gas2	-2.88	0.000394
17397740	mab-21-like 1 (C. elegans)	Mab21l1	-2.87	0.000511
17355332	deleted in colorectal carcinoma	Dcc	-2.85	0.000416
17224977	delta/notch-like EGF repeat containing	Dner	-2.84	0.00132
17405724	short stature homeobox 2	Shox2	-2.8	0.008977
17459207	neuron-derived neurotrophic factor	Ndnf	-2.79	0.000334
17354906	piezo-type mechanosensitive ion channel component 2	Piezo2	-2.78	0.001087
17398416	platelet-derived growth factor, C polypeptide	Pdgfc	-2.77	0.000136
17364111	cholesterol 25-hydroxylase	Ch25h	-2.75	0.005714
17442765	transmembrane protein 132C	Tmem132c	-2.72	0.011761
17434764	sema domain, immunoglobulin domain (Ig), short basic domain, secreted, (semaphorin) 3A	Sema3a	-2.7	0.000262
17278998			-2.69	0.045585
17290447	cholinergic receptor, muscarinic 3, cardiac	Chrm3	-2.68	0.002574
17406165	glycine receptor, beta subunit	Glrb	-2.68	0.00026
17245422	high mobility group AT-hook 2	Hmga2	-2.67	0.003195
17545199	leucine-rich repeats and calponin homology (CH) domain containing 2	Lrch2	-2.67	0.002508
17366778	predicted gene, 24761 [Source:MGI Symbol;Acc:MGI:5454538]	Gm24761	-2.66	0.000132
17398557	secreted frizzled-related protein 2	Sfrp2	-2.66	0.003491
17528963	leucine rich repeat containing 1	Lrrc1	-2.66	0.000367
17395041	bone morphogenetic protein 7	Bmp7	-2.64	0.003334
17295745	centromere protein H	Cenph	-2.62	0.001617
17326964	hormonally upregulated Neu-associated kinase	Hunk	-2.61	0.002522
17366758	predicted gene, 24488 [Source:MGI Symbol;Acc:MGI:5454265]; predicted gene, 25701 [Source:MGI Symbol;Acc:MGI:5455478]; predicted gene, 26431 [Source:MGI Symbol;Acc:MGI:5456208]	Gm24488	-2.61	0.000671
17366802	predicted gene, 24488 [Source:MGI Symbol;Acc:MGI:5454265]; predicted gene, 25701 [Source:MGI Symbol;Acc:MGI:5455478]; predicted gene, 26431 [Source:MGI Symbol;Acc:MGI:5456208]	Gm24488	-2.61	0.000671
17366838	predicted gene, 24488 [Source:MGI Symbol;Acc:MGI:5454265]; predicted gene, 25701 [Source:MGI Symbol;Acc:MGI:5455478]; predicted gene, 26431 [Source:MGI Symbol;Acc:MGI:5456208]	Gm24488	-2.61	0.000671
17414651	zinc finger protein 618	Zfp618	-2.61	1.1e-05
17530311	transmembrane protein 108	Tmem108	-2.61	0.001129
17545150	lipoma HMGIC fusion partner-like 1	Lhfpl1	-2.6	0.001216
17359212	helicase, lymphoid specific	Hells	-2.59	0.000242
17355565	solute carrier family 14 (urea transporter), member 1	Slc14a1	-2.58	0.00188
17249461	follistatin-like 4	Fstl4	-2.57	0.000758
17293006	chemokine (C-X-C motif) ligand 14	Cxcl14	-2.57	0.016971
17537306	kelch-like 4	Klhl4	-2.57	0.013411
17227910	hemicentin 1	Hmcn1	-2.56	0.003611
17445507	DBF4 homolog (S. cerevisiae)	Dbf4	-2.56	0.001063
17219848	exonuclease 1	Exo1	-2.55	0.00059
17304512	predicted gene, 24916 [Source:MGI Symbol;Acc:MGI:5454693]	Gm24916	-2.54	0.013462
17310339	C1q and tumor necrosis factor related protein 3	C1qtnf3	-2.54	0.000715
17352265	cerebellin 2 precursor protein	Cbln2	-2.54	0.005147
17426434	bone morphogenic protein/retinoic acid inducible neural specific 1	Brinp1	-2.54	0.003287
17544164	ribosomal protein S6 kinase polypeptide 6	Rps6ka6	-2.54	0.000926
17394538	sulfatase 2	Sulf2	-2.53	0.001575
17515950	cell adhesion molecule-related/down-regulated by oncogenes	Cdon	-2.53	0.009059
17411262	ST6 (alpha-N-acetyl-neuraminyl-2,3-beta-galactosyl-1,3)-N-acetylgalactosaminide alpha-2,6-sialyltransferase 3	St6galnac3	-2.52	0.000747
17406456	mab-21-like 2 (C. elegans)	Mab21l2	-2.51	0.000287
17437302	slit homolog 2 (Drosophila)	Slit2	-2.51	0.000269
17507288	Shc SH2-domain binding protein 1	Shcbp1	-2.51	0.000376
17537271	zinc finger protein 711	Zfp711	-2.51	0.002029
17486449	zinc finger protein interacting with K protein 1	Zik1	-2.5	0.000511
17262172	predicted gene, 23039 [Source:MGI Symbol;Acc:MGI:5452816]	Gm23039	-2.49	0.004556
17316793	R-spondin 2	Rspo2	-2.49	0.000197
17401902	collagen, type XI, alpha 1	Col11a1	-2.49	0.023746
17547684			-2.49	0.007468
17401563	solute carrier family 16 (monocarboxylic acid transporters), member 4	Slc16a4	-2.48	0.002461
17398115	pentraxin related gene	Ptx3	-2.46	0.003946
17352517	mohawk homeobox	Mkx	-2.45	0.007884
17456084	forkhead box P2	Foxp2	-2.45	0.008042
17261710	spindle apparatus coiled-coil protein 1	Spdl1	-2.43	0.001267
17345134	runt related transcription factor 2	Runx2	-2.43	0.027855
17376677	bone morphogenetic protein 2	Bmp2	-2.42	0.004365
17360845	empty spiracles homeobox 2	Emx2	-2.41	0.001634
17391376	budding uninhibited by benzimidazoles 1 homolog (S. cerevisiae)	Bub1	-2.41	0.002329
17525503	checkpoint kinase 1	Chek1	-2.41	0.001845
17548979	predicted gene 4322 [Source:MGI Symbol;Acc:MGI:3782503]	Gm4322	-2.4	0.03473
17480675	procollagen-proline, 2-oxoglutarate 4-dioxygenase (proline 4-hydroxylase), alpha polypeptide III	P4ha3	-2.39	0.000846
17490038	predicted gene 5593	Gm5593	-2.39	0.009675
17544385	tetraspanin 6	Tspan6	-2.39	0.000395
17409963	formin binding protein 1-like	Fnbp1l	-2.38	0.001085
17479834	mex3 homolog B (C. elegans)	Mex3b	-2.38	0.000322
17545629	phosphate regulating endopeptidase homolog, X-linked	Phex	-2.38	0.002071
17319887	signal peptide, CUB domain, EGF-like 1	Scube1	-2.37	0.002885
17532755	diacylglycerol kinase kappa	Dgkk	-2.37	0.006117
17541618	muscleblind-like 3 (Drosophila)	Mbnl3	-2.37	0.000154
17358368	doublesex and mab-3 related transcription factor 2	Dmrt2	-2.35	0.002451
17501484	sparc/osteonectin, cwcv and kazal-like domains proteoglycan 3	Spock3	-2.35	0.005042
17350552	proline rich 16	Prr16	-2.34	0.000134
17405075	protocadherin 18	Pcdh18	-2.34	0.001898
17436999	collapsin response mediator protein 1	Crmp1	-2.34	0.001828
17464672	solute carrier family 25 (mitochondrial carrier, adenine nucleotide translocator), member 13	Slc25a13	-2.34	0.001496
17244661	transmembrane and tetratricopeptide repeat containing 2	Tmtc2	-2.33	0.002576
17265470	RIKEN cDNA 6330403K07 gene	6330403K07Rik	-2.33	0.029487
17411966	calbindin 1	Calb1	-2.33	0.028524
17545327	trophinin	Tro	-2.33	0.000104
17414017	transmembrane protein with EGF-like and two follistatin-like domains 1	Tmeff1	-2.32	0.001795
17461448	glutamate receptor, metabotropic 7	Grm7	-2.32	0.002696
17512153	cadherin 11	Cdh11	-2.32	0.00098
17274021	odd-skipped related 1 (Drosophila)	Osr1	-2.31	0.001855
17309457	DAZ interacting protein 1	Dzip1	-2.31	0.000522
17294302	thyroid hormone receptor interactor 13	Trip13	-2.3	0.000403
17295757	cyclin B1	Ccnb1	-2.3	0.002862
17330443	growth associated protein 43	Gap43	-2.3	0.008728
17350740	lamin B1	Lmnb1	-2.3	0.000539
17493358	DNA damage-induced apoptosis suppressor	Ddias	-2.3	0.007733
17274394			-2.29	0.004173
17298112	wingless-type MMTV integration site family, member 5A	Wnt5a	-2.29	0.007544
17425525	ferric-chelate reductase 1 like	Frrs1l	-2.29	0.000542
17353520	cell division cycle 25C	Cdc25c	-2.28	0.000625
17489886	cyclin E1	Ccne1	-2.28	0.007641
17304514	small nucleolar RNA, C/D box 19	Snord19	-2.27	0.009727
17372552	family with sequence similarity 171, member B	Fam171b	-2.27	4.1e-05
17453776	collagen, type XXVI, alpha 1	Col26a1	-2.27	0.000651
17455903	ankyrin repeat and SOCS box-containing 4	Asb4	-2.27	0.001198
17518314	predicted gene, 22571 [Source:MGI Symbol;Acc:MGI:5452348]	Gm22571	-2.27	0.021493
17211198	sulfatase 1	Sulf1	-2.26	0.00175
17466932	TLR4 interactor with leucine-rich repeats	Tril	-2.26	0.000117
17309360	SLIT and NTRK-like family, member 1	Slitrk1	-2.25	0.012032
17374028	metallophosphoesterase domain containing 2	Mpped2	-2.25	0.000239
17403969	RIKEN cDNA 2700069I18 gene	2700069I18Rik	-2.25	0.001767
17541343	SWI/SNF related, matrix associated, actin dependent regulator of chromatin, subfamily a, member 1; predicted gene, 38682	Smarca1	-2.25	0.002067
17547744	CDC28 protein kinase regulatory subunit 2	Cks2	-2.25	0.002266
17547813			-2.25	0.00834
17548303	predicted gene 12891 [Source:MGI Symbol;Acc:MGI:3649646]	Gm12891	-2.25	0.002266
17548955	CDC28 protein kinase regulatory subunit 2	Cks2	-2.25	0.002266
17235831	predicted gene 4767; predicted gene 10778	Gm4767	-2.24	0.00404
17237701	Wnt inhibitory factor 1	Wif1	-2.24	0.002202
17348276	frizzled homolog 8 (Drosophila)	Fzd8	-2.24	0.000616
17451930	expressed sequence AW549542	AW549542	-2.24	0.00147
17457381	tetratricopeptide repeat domain 26	Ttc26	-2.24	0.000939
17405789	tripartite motif-containing 59	Trim59	-2.23	0.001176
17518318	predicted gene, 22455 [Source:MGI Symbol;Acc:MGI:5452232]	Gm22455	-2.23	0.003593
17524233	FAT tumor suppressor homolog 3 (Drosophila)	Fat3	-2.23	0.001068
17239755	predicted gene, 23130 [Source:MGI Symbol;Acc:MGI:5452907]	Gm23130	-2.22	0.007409
17261840	hyaluronan mediated motility receptor (RHAMM)	Hmmr	-2.22	0.000379
17288035	predicted gene 3325	Gm3325	-2.22	0.000811
17288521	telomerase reverse transcriptase	Tert	-2.22	0.000576
17373857	cleavage stimulation factor, 3 pre-RNA, subunit 3	Cstf3	-2.22	0.007225
17412013	matrix metallopeptidase 16	Mmp16	-2.22	3.2e-05
17499962	plasminogen activator, tissue	Plat	-2.22	0.006853
17535245	AF4/FMR2 family, member 2	Aff2	-2.22	0.001208
17224661	Eph receptor A4	Epha4	-2.21	0.000587
17274540	ribonucleotide reductase M2	Rrm2	-2.21	0.003831
17274959	twist basic helix-loop-helix transcription factor 1	Twist1	-2.21	0.002826
17347493	serine/arginine-rich splicing factor 7	Srsf7	-2.21	0.000917
17397990	membrane metallo endopeptidase	Mme	-2.21	0.013297
17400539	histone cluster 2, H2ab	Hist2h2ab	-2.21	0.042703
17417407	phosphatidylinositol 3 kinase, regulatory subunit, polypeptide 3 (p55)	Pik3r3	-2.21	0.007617
17454310	glypican 2 (cerebroglycan)	Gpc2	-2.21	0.000205
17524944	zinc finger protein 599	Zfp599	-2.21	0.001222
17529481	T-box18	Tbx18	-2.21	0.001785
17221093	predicted gene 6104 [Source:MGI Symbol;Acc:MGI:3648587]	Gm6104	-2.2	0.002439
17301582	neurofilament, light polypeptide	Nefl	-2.19	0.008231
17351137	interleukin 17B	Il17b	-2.19	0.009677
17458734	pleckstrin homology domain containing, family A (phosphoinositide binding specific) member 8	Plekha8	-2.19	0.000132
17548593			-2.19	0.006897
17238210	DNA primase, p49 subunit	Prim1	-2.18	0.000258
17248255	hemoglobin X, alpha-like embryonic chain in Hba complex	Hba-x	-2.18	0.022406
17350591	synuclein, alpha interacting protein (synphilin)	Sncaip	-2.18	0.000717
17274412			-2.17	0.025426
17285414	GLI-Kruppel family member GLI3	Gli3	-2.17	0.004267
17364597	tolloid-like 2	Tll2	-2.17	0.009178
17519910	Ttk protein kinase	Ttk	-2.17	0.000347
17550454			-2.17	0.003505
17251370	myosin, heavy polypeptide 10, non-muscle	Myh10	-2.16	0.000715
17256225	cell division cycle 6	Cdc6	-2.16	0.005724
17287330	CDC28 protein kinase regulatory subunit 2	Cks2	-2.16	0.001733
17326081	RIKEN cDNA C330027C09 gene	C330027C09Rik	-2.16	0.000245
17378741	neuronatin	Nnat	-2.16	0.000133
17381999	SKI/DACH domain containing 1	Skida1	-2.16	0.000115
17477734	TEA domain family member 2	Tead2	-2.16	0.002181
17489908	processing of precursor 4, ribonuclease P/MRP family, (S. cerevisiae)	Pop4	-2.16	0.028335
17504019	adaptor-related protein complex 3, sigma 1 subunit, pseudogene 2 [Source:MGI Symbol;Acc:MGI:1929217]	Ap3s1-ps2	-2.16	0.044567
17254670	spindle and kinetochore associated complex subunit 2	Ska2	-2.15	0.00054
17374488	thrombospondin 1	Thbs1	-2.15	0.023462
17397268	polo-like kinase 4	Plk4	-2.15	0.00054
17402797	centromere protein E	Cenpe	-2.15	0.000212
17405047	RIKEN cDNA 2610316D01 gene	2610316D01Rik	-2.15	0.008065
17232082	retinoic acid early transcript delta; retinoic acid early transcript 1E; retinoic acid early transcript beta	Raet1d	-2.14	0.000277
17288079	predicted gene, 24588 [Source:MGI Symbol;Acc:MGI:5454365]	Gm24588	-2.14	0.004082
17301594	stanniocalcin 1	Stc1	-2.14	0.001858
17331380	Eph receptor A3	Epha3	-2.14	0.024131
17469463	RING1 and YY1 binding protein	Rybp	-2.14	0.002821
17511377	neuropilin (NRP) and tolloid (TLL)-like 2	Neto2	-2.14	5.6e-05
17550390			-2.14	0.002435
17366790	predicted gene, 25680 [Source:MGI Symbol;Acc:MGI:5455457]; predicted gene, 22635 [Source:MGI Symbol;Acc:MGI:5452412]	Gm25680	-2.13	0.008341
17366826	predicted gene, 25680 [Source:MGI Symbol;Acc:MGI:5455457]; predicted gene, 22635 [Source:MGI Symbol;Acc:MGI:5452412]	Gm25680	-2.13	0.008341
17373530	synaptotagmin XIII	Syt13	-2.13	0.005557
17381225	suppressor of variegation 3-9 homolog 2 (Drosophila)	Suv39h2	-2.13	0.00098
17405247	exosome component 8	Exosc8	-2.13	0.000877
17249863	glutamate receptor, ionotropic, AMPA1 (alpha 1)	Gria1	-2.12	0.002544
17387514	predicted gene, 19426	Gm19426	-2.12	0.008395
17491741			-2.12	0.012443
17518780	carbonic anyhydrase 12	Car12	-2.12	0.010089
17211258	retinol dehydrogenase 10 (all-trans)	Rdh10	-2.11	2.6e-05
17264588	chromodomain helicase DNA binding protein 3	Chd3	-2.11	0.001816
17462492	alpha-2-macroglobulin	A2m	-2.11	0.001875
17516420	microRNA 125b-1	Mir125b-1	-2.11	0.006694
17528137	zwilch kinetochore protein	Zwilch	-2.11	0.002409
17529930	calsyntenin 2	Clstn2	-2.11	0.002136
17245272	nucleoporin 107	Nup107	-2.1	0.001048
17392255	fibronectin leucine rich transmembrane protein 3	Flrt3	-2.1	0.009401
17416566	mago homolog, exon junction complex core component	Magoh	-2.1	0.003273
17471311	RAD9-HUS1-RAD1 interacting nuclear orphan 1	Rhno1	-2.1	0.013062
17218044	bone morphogenetic protein/retinoic acid inducible neural specific 3	Brinp3	-2.09	0.038679
17228667	pappalysin 2	Pappa2	-2.09	0.00245
17399086	mex3 homolog A (C. elegans)	Mex3a	-2.09	0.000842
17534706	PHD finger protein 6	Phf6	-2.09	0.000324
17543870	zinc finger, DHHC domain containing 15	Zdhhc15	-2.09	0.0006
17326604	roundabout homolog 1 (Drosophila)	Robo1	-2.08	0.003515
17366047	Emx2 opposite strand/antisense transcript (non-protein coding)	Emx2os	-2.08	0.009798
17437350	predicted gene 20475 [Source:MGI Symbol;Acc:MGI:5141940]	Gm20475	-2.08	0.000786
17330058	protein disulfide isomerase associated 5	Pdia5	-2.07	0.003634
17389635	Meis homeobox 2	Meis2	-2.07	0.008681
17437876	ubiquitin carboxy-terminal hydrolase L1	Uchl1	-2.07	0.008024
17455507	heat shock 105kDa/110kDa protein 1	Hsph1	-2.07	0.014491
17458669	RIKEN cDNA 9430076C15 gene; cAMP responsive element binding protein 5	9430076C15Rik	-2.07	0.002703
17472678	branched chain aminotransferase 1, cytosolic	Bcat1	-2.07	0.000565
17516397	RIKEN cDNA 3110039I08 gene	3110039I08Rik	-2.07	0.000542
17522235	cell division cycle 25A	Cdc25a	-2.07	0.000606
17258867	baculoviral IAP repeat-containing 5	Birc5	-2.06	0.025854
17281506	polymerase (DNA directed), epsilon 2 (p59 subunit)	Pole2	-2.06	0.006699
17328432	minichromosome maintenance deficient 4 homolog (S. cerevisiae)	Mcm4	-2.06	0.000724
17358838	kinesin family member 20B	Kif20b	-2.06	0.00035
17364280	myoferlin	Myof	-2.06	0.00016
17430831	small nucleolar RNA, H/ACA box 73b	Snora73b	-2.05	0.001816
17504321	GINS complex subunit 3 (Psf3 homolog)	Gins3	-2.05	0.000388
17243509	nuclear transcription factor-Y beta	Nfyb	-2.04	0.003778
17274401	RIKEN cDNA 6030426L16 gene	6030426L16Rik	-2.04	0.004244
17300686	NYN domain and retroviral integrase containing	Nynrin	-2.04	0.00133
17310982	odd-skipped related 2	Osr2	-2.04	0.014974
17338747	ubiquitin-like, containing PHD and RING finger domains, 1	Uhrf1	-2.04	0.00193
17393562	predicted gene 14230	Gm14230	-2.04	0.004418
17478406	NEL-like 1	Nell1	-2.04	0.001505
17527934	kinesin family member 23	Kif23	-2.04	0.000414
17529383	phosphoglucomutase 3	Pgm3	-2.04	0.010258
17218653	growth arrest specific 5	Gas5	-2.03	0.001179
17221633	minichromosome maintenance deficient 3 (S. cerevisiae)	Mcm3	-2.03	0.002004
17230256	adenylosuccinate synthetase, non muscle	Adss	-2.03	0.000425
17233347	gap junction protein, alpha 1	Gja1	-2.03	0.001281
17237252	nucleosome assembly protein 1-like 1; nucleosome assembly protein 1-like 1 pseudogene	Nap1l1	-2.03	0.001685
17324402	predicted gene, 24616 [Source:MGI Symbol;Acc:MGI:5454393]	Gm24616	-2.03	0.015461
17393046	RIKEN cDNA 2500004C02 gene	2500004C02Rik	-2.03	0.003384
17404402	ect2 oncogene	Ect2	-2.03	0.000905
17428803	kinesin family member 2C	Kif2c	-2.03	0.000674
17439978	cell division cycle 7 (S. cerevisiae)	Cdc7	-2.03	0.00404
17466641	insulin-like growth factor 2 mRNA binding protein 3	Igf2bp3	-2.03	0.000641
17492619	Bloom syndrome, RecQ helicase-like	Blm	-2.03	0.000302
17538658	WNK lysine deficient protein kinase 3	Wnk3	-2.03	0.003517
17245059	leucine rich repeat containing G protein coupled receptor 5	Lgr5	-2.02	0.002778
17267885	calcium channel, voltage-dependent, T type, alpha 1G subunit	Cacna1g	-2.02	0.01721
17288992	EGF-like repeats and discoidin I-like domains 3; predicted gene, 38504	Edil3	-2.02	0.009259
17338670	fibronectin type 3 and SPRY domain-containing protein	Fsd1	-2.02	0.006127
17359020	kinesin family member 11	Kif11	-2.02	0.000107
17421394	SWI/SNF related, matrix associated, actin dependent regulator of chromatin, subfamily a, member 5 pseudogene	Gm13034	-2.02	0.002501
17466878	homeobox A10	Hoxa10	-2.02	1.3e-05
17523494	kinesin family member 15	Kif15	-2.02	0.000125
17296080	predicted gene, 24431 [Source:MGI Symbol;Acc:MGI:5454208]	Gm24431	-2.01	0.016527
17307203	spindle and kinetochore associated complex subunit 3	Ska3	-2.01	0.001238
17331481	roundabout homolog 2 (Drosophila)	Robo2	-2.01	0.004631
17352884	cadherin 2	Cdh2	-2.01	8.5e-05
17448595	gamma-aminobutyric acid (GABA) A receptor, subunit alpha 4	Gabra4	-2.01	0.026293
17510701	RNA binding motif protein, X-linked like-1	Rbmxl1	-2.01	0.000493
17518331	timeless interacting protein	Tipin	-2.01	0.000443
17548264			-2.01	0.000219
17264769	ephrin B3	Efnb3	-2	0.007558
17339991	echinoderm microtubule associated protein like 4	Eml4	-2	0.000563
17373680	peptidase domain containing associated with muscle regeneration 1; predicted gene, 39891	Pamr1	-2	0.030184
17388284	midkine	Mdk	-2	0.003167
17414114	structural maintenance of chromosomes 2	Smc2	-2	0.000845
17447835	prominin 1	Prom1	-2	0.010076
17499849	asparagine-linked glycosylation 11 (alpha-1,2-mannosyltransferase)	Alg11	-2	0.000676
17507321	ephrin B2	Efnb2	-2	0.00452
17538350	RIKEN cDNA A730046J19 gene	A730046J19Rik	-2	0.002877
17303882	synaptopodin 2-like	Synpo2l	2	0.008422
17414385	muscle, skeletal, receptor tyrosine kinase	Musk	2	0.02738
17547719	AHNAK nucleoprotein 2	Ahnak2	2	0.023078
17361890	calpain 1	Capn1	2.01	0.004849
17397957	purinergic receptor P2Y, G-protein coupled 1	P2ry1	2.01	0.001623
17416023	phosphodiesterase 4B, cAMP specific	Pde4b	2.01	0.003378
17428967	importin 13	Ipo13	2.01	0.008542
17466599	retinoic acid receptor responder (tazarotene induced) 2	Rarres2	2.01	0.012134
17548748	uncharacterized LOC105243404	LOC105243404	2.01	0.006237
17212982	aldehyde oxidase 1	Aox1	2.02	0.006536
17219536	potassium inwardly-rectifying channel, subfamily J, member 10	Kcnj10	2.02	0.000345
17230087	interferon activated gene 203	Ifi203	2.02	0.003088
17231611	predicted gene, 25682 [Source:MGI Symbol;Acc:MGI:5455459]	Gm25682	2.02	0.037566
17286973	guanosine monophosphate reductase	Gmpr	2.02	0.001454
17306477	solute carrier family 7 (cationic amino acid transporter, y+ system), member 8	Slc7a8	2.02	0.004378
17307113	gap junction protein, alpha 3	Gja3	2.02	0.010881
17332804	synaptojanin 2	Synj2	2.02	0.00185
17427554	predicted gene 12688	Gm12688	2.02	0.002739
17420777	aldehyde dehydrogenase 4 family, member A1	Aldh4a1	2.03	0.006232
17252200	kinesin family member 1C	Kif1c	2.04	0.000853
17272785	lectin, galactoside-binding, soluble, 3 binding protein	Lgals3bp	2.04	0.005047
17400592	hemochromatosis type 2 (juvenile) (human homolog)	Hfe2	2.04	0.009569
17434490	STEAP family member 4	Steap4	2.04	0.007513
17483242	myosin light chain, phosphorylatable, fast skeletal muscle	Mylpf	2.04	0.034828
17373240	protein kinase C and casein kinase substrate in neurons 3	Pacsin3	2.05	0.002024
17382802	ubiquitin associated domain containing 1	Ubac1	2.05	6.8e-05
17384457	stomatin	Stom	2.05	0.00258
17469360	leiomodin 3 (fetal)	Lmod3	2.05	0.008208
17214487	SPEG complex locus	Speg	2.06	0.012902
17233210	leukocyte immunoglobulin-like receptor, subfamily B, member 4B	Lilr4b	2.06	0.005894
17236003	t-complex 11 (mouse) like 2	Tcp11l2	2.06	0.004575
17247317	predicted gene, 23065 [Source:MGI Symbol;Acc:MGI:5452842]	Gm23065	2.06	0.02228
17248561	ATPase, class V, type 10B	Atp10b	2.06	0.004902
17256440	signal transducer and activator of transcription 5A	Stat5a	2.06	0.007299
17284037	mitochondrial pyruvate carrier 1; mitochondrial pyruvate carrier 1, pseudogene	Mpc1	2.06	0.009136
17287148	extracellular matrix protein 2, female organ and adipocyte specific	Ecm2	2.06	0.041341
17450741	ATP synthase, H+ transporting, mitochondrial F1F0 complex, subunit E	Atp5k	2.06	0.012625
17521541	ubiquitin-like modifier activating enzyme 7	Uba7	2.06	0.005745
17533207	Kell blood group precursor (McLeod phenotype) homolog	Xk	2.06	0.007183
17282975	RIKEN cDNA 4930544I03 gene [Source:MGI Symbol;Acc:MGI:1925447]	4930544I03Rik	2.07	0.001046
17307446	sarcoglycan, gamma (dystrophin-associated glycoprotein)	Sgcg	2.07	0.038386
17405142	SET domain containing (lysine methyltransferase) 7	Setd7	2.07	0.001228
17527353	electron transferring flavoprotein, alpha polypeptide	Etfa	2.07	0.034415
17215750	kelch-like 30	Klhl30	2.08	0.002942
17377122	predicted gene 561	Gm561	2.08	0.005761
17435055	gamma-secretase activating protein	Gsap	2.08	0.014708
17216642	secretin receptor	Sctr	2.09	0.04308
17359716	hypoxia-inducible factor 1, alpha subunit inhibitor	Hif1an	2.09	0.00032
17413662	predicted gene 12408	Gm12408	2.09	0.005707
17418268	POU domain, class 3, transcription factor 1	Pou3f1	2.09	0.000476
17233669	pterin 4 alpha carbinolamine dehydratase/dimerization cofactor of hepatocyte nuclear factor 1 alpha (TCF1) 1	Pcbd1	2.11	0.006325
17286682	bone morphogenetic protein 6	Bmp6	2.11	0.020834
17451649	acyl-Coenzyme A dehydrogenase, short chain	Acads	2.11	0.021796
17461703	interleukin 17 receptor C	Il17rc	2.11	0.026786
17526861	dihydrolipoamide S-acetyltransferase (E2 component of pyruvate dehydrogenase complex)	Dlat	2.11	0.000424
17548916			2.11	0.009091
17256924	ankyrin repeat and SOCS box-containing 16	Asb16	2.12	0.008903
17265657	smoothelin-like 2	Smtnl2	2.12	0.004214
17280144	potassium voltage-gated channel, subfamily F, member 1	Kcnf1	2.12	0.012827
17300802	poly (ADP-ribose) polymerase family, member 4	Parp4	2.12	0.006832
17305986	ribonuclease P RNA component H1	Rpph1	2.12	0.024614
17334091	host cell factor C1 regulator 1 (XPO1-dependent)	Hcfc1r1	2.12	0.011604
17356412	RIKEN cDNA 4930481A15 gene	4930481A15Rik	2.12	0.013032
17406423	glycosyltransferase 28 domain containing 2; family with sequence similarity 160, member A1; ADP-ribosylation factor interacting protein 1	Glt28d2	2.12	0.000753
17494664	very large inducible GTPase 1 pseudogene	Gm8989	2.12	0.001588
17536163	nuclear encoded rRNA 5S 9 [Source:MGI Symbol;Acc:MGI:4421743]	n-R5s9	2.12	0.00335
17541036	NADH dehydrogenase (ubiquinone) 1 alpha subcomplex, 1	Ndufa1	2.12	0.000723
17268884	nuclear receptor subfamily 1, group D, member 1	Nr1d1	2.13	0.034349
17332628	C2 calcium-dependent domain containing 2	C2cd2	2.13	0.024379
17453454	elastin	Eln	2.13	0.006822
17459716	succinate-CoA ligase, GDP-forming, alpha subunit	Suclg1	2.13	0.006944
17518911	RAR-related orphan receptor alpha	Rora	2.13	0.006719
17251527	period circadian clock 1	Per1	2.14	0.005077
17279349	adenylosuccinate synthetase like 1	Adssl1	2.14	0.007613
17319619	NADH dehydrogenase (ubiquinone) 1 alpha subcomplex, 6 (B14)	Ndufa6	2.14	0.003523
17536759	integrin beta 1 binding protein 2	Itgb1bp2	2.14	0.034411
17226313	STEAP family member 3	Steap3	2.15	0.00069
17256404	2,3-cyclic nucleotide 3 phosphodiesterase	Cnp	2.15	8.3e-05
17344456	RIKEN cDNA 2310061I04 gene	2310061I04Rik	2.15	0.006047
17447331	carboxypeptidase Z	Cpz	2.15	0.005375
17456152	caveolin 2	Cav2	2.15	0.009211
17463298	predicted gene 16303 [Source:MGI Symbol;Acc:MGI:3826584]	Gm16303	2.15	0.03056
17473248	tweety homolog 1 (Drosophila)	Ttyh1	2.15	0.000949
17242842	guanidinoacetate methyltransferase	Gamt	2.16	0.003198
17260699	cordon-bleu WH2 repeat	Cobl	2.16	0.004439
17332236	runt related transcription factor 1	Runx1	2.16	0.00086
17397695	spermatogenesis and oogenesis specific basic helix-loop-helix 2	Sohlh2	2.16	0.010916
17451251	myosin XVIIIb	Myo18b	2.16	0.04535
17468551	annexin A4	Anxa4	2.16	0.001167
17479736	transmembrane 6 superfamily member 1	Tm6sf1	2.16	0.003974
17494656	GTPase, very large interferon inducible 1; predicted gene 4070	Gvin1	2.16	0.00234
17230484	epoxide hydrolase 1, microsomal	Ephx1	2.17	0.004492
17301055	C1q and tumor necrosis factor related protein 9	C1qtnf9	2.17	0.010512
17369379	hemicentin 2	Hmcn2	2.17	0.042729
17370487	olfactomedin-like 2A	Olfml2a	2.17	0.01885
17230252	RIKEN cDNA 2310043L19 gene	2310043L19Rik	2.18	0.000212
17233993	early growth response 2	Egr2	2.18	0.002253
17234131	myoregulin	Mrln	2.18	0.006901
17318100	lymphocyte antigen 6 complex, locus C2	Ly6c2	2.18	0.017315
17333347	superoxide dismutase 2, mitochondrial	Sod2	2.18	0.001952
17436877	actin-binding LIM protein 2	Ablim2	2.18	0.012312
17471492	RIKEN cDNA 2310001H17 gene	2310001H17Rik	2.18	0.045153
17291674	myosin light chain kinase family, member 4	Mylk4	2.19	0.007001
17442909	glioblastoma amplified sequence	Gbas	2.19	0.002531
17456381	protein tyrosine phosphatase, receptor type Z, polypeptide 1	Ptprz1	2.19	0.033467
17504707	nucleolar protein 3 (apoptosis repressor with CARD domain)	Nol3	2.19	0.00781
17517727	cytochrome c oxidase subunit Va	Cox5a	2.19	0.010782
17521300	cytokine inducible SH2-containing protein	Cish	2.19	0.005441
17236227	5-nucleotidase domain containing 3	Nt5dc3	2.2	0.031111
17322700	RNA binding protein, fox-1 homolog (C. elegans) 1	Rbfox1	2.2	0.024747
17339395	myomesin 1	Myom1	2.2	0.011694
17403268	guanylate binding protein 2	Gbp2	2.2	0.004032
17493807	pleckstrin homology domain containing, family B (evectins) member 1	Plekhb1	2.2	0.001828
17502462	transmembrane protein 38A	Tmem38a	2.2	0.03189
17215240	EF hand domain containing 1	Efhd1	2.21	3.7e-05
17279317	RIKEN cDNA A530016L24 gene	A530016L24Rik	2.21	0.012568
17423665	four and a half LIM domains 5	Fhl5	2.21	0.007157
17538096	ring finger protein 128	Rnf128	2.21	0.004107
17539110	small muscle protein, X-linked	Smpx	2.21	0.014556
17261865	cyclin G1	Ccng1	2.22	0.020715
17262241	RIKEN cDNA 9930111J21 gene 2	9930111J21Rik2	2.22	0.004635
17263031	predicted gene, 24253 [Source:MGI Symbol;Acc:MGI:5454030]	Gm24253	2.22	0.007028
17491362	MAS-related GPR, member B2	Mrgprb2	2.22	0.001547
17222642	four and a half LIM domains 2	Fhl2	2.23	0.000332
17302869	citrate lyase beta like	Clybl	2.23	0.013105
17312396	cytochrome c-1	Cyc1	2.23	0.005161
17328070	tektin 5	Tekt5	2.23	5.4e-05
17339574	EH-domain containing 3	Ehd3	2.23	0.007752
17393008	dual specificity phosphatase-like 15	Dusp15	2.23	0.016738
17404329	glycogenin	Gyg	2.23	0.000342
17421867	G protein-coupled receptor 157	Gpr157	2.23	0.004613
17463670			2.23	0.015394
17237522	bestrophin 3	Best3	2.24	0.016732
17419411	small nucleolar RNA, C/D box 99	Snord99	2.24	0.00026
17459676	retinol saturase (all trans retinol 13,14 reductase)	Retsat	2.24	0.003302
17462437	ubiquitin specific peptidase 18	Usp18	2.24	0.003163
17224540	tubulin, alpha 4A	Tuba4a	2.25	0.04546
17312341	glutamate receptor, ionotropic, N-methyl D-aspartate-associated protein 1 (glutamate binding)	Grina	2.25	0.004389
17318160	v-maf musculoaponeurotic fibrosarcoma oncogene family, protein A (avian)	Mafa	2.25	0.013366
17322735	methyltransferase like 22	Mettl22	2.25	0.001762
17372255	predicted gene 13938 [Source:MGI Symbol;Acc:MGI:3651046]	Gm13938	2.25	0.00029
17392609	cystatin C	Cst3	2.25	0.006167
17427961	carnitine palmitoyltransferase 2	Cpt2	2.25	0.019262
17230078	myeloid cell nuclear differentiation antigen; interferon activated gene 204	Mnda	2.26	0.016583
17254153	schlafen 5	Slfn5	2.26	0.001258
17452709	hydrocarboxylic acid receptor 1	Hcar1	2.26	0.012984
17520835	kyphoscoliosis peptidase	Ky	2.26	0.010092
17530863	mitogen-activated protein kinase-activated protein kinase 3	Mapkapk3	2.26	0.011632
17258638	small nucleolar RNA, C/D box 1C	Snord1c	2.27	0.003884
17303958	dual specificity phosphatase and pro isomerase domain containing 1	Dupd1	2.27	0.009112
17363757	RIKEN cDNA 4430402I18 gene	4430402I18Rik	2.27	0.006109
17413770	tropomodulin 1	Tmod1	2.27	0.005028
17294086	adenylate cyclase 2	Adcy2	2.28	0.005026
17357904	olfactory receptor 1454	Olfr1454	2.28	0.014053
17381078	uridine-cytidine kinase 1-like 1, opposite strand	Uckl1os	2.28	0.042347
17432256	solute carrier family 25, member 34	Slc25a34	2.28	0.001309
17469879	tissue inhibitor of metalloproteinase 4	Timp4	2.28	0.013284
17259534	solute carrier family 16 (monocarboxylic acid transporters), member 3	Slc16a3	2.29	0.016544
17268691	calcium channel, voltage-dependent, beta 1 subunit	Cacnb1	2.29	0.009217
17441334	RIKEN cDNA C330018A13 gene	C330018A13Rik	2.29	0.037155
17342029	NADH dehydrogenase (ubiquinone) 1 beta subcomplex, 10	Ndufb10	2.3	0.005001
17350916	predicted gene 4951	Gm4951	2.3	0.00943
17284839	integrin beta 8	Itgb8	2.31	0.026903
17313394	aconitase 2, mitochondrial	Aco2	2.31	0.029242
17313705	parvin, beta	Parvb	2.31	0.019268
17506273	cytochrome c oxidase subunit IV isoform 1	Cox4i1	2.31	0.00748
17259623	fructosamine 3 kinase	Fn3k	2.32	0.00032
17300544	fat storage-inducing transmembrane protein 1	Fitm1	2.32	0.022342
17440312	fibroblast growth factor receptor-like 1	Fgfrl1	2.32	0.00395
17445089	furry homolog (Drosophila)	Fry	2.32	0.029426
17517831	cytochrome P450, family 11, subfamily a, polypeptide 1	Cyp11a1	2.32	8.3e-05
17232763	D-aspartate oxidase	Ddo	2.33	0.031117
17287536	tetraspanin 17	Tspan17	2.33	0.008385
17315178	nuclear receptor subfamily 4, group A, member 1	Nr4a1	2.33	0.011871
17330099	poly (ADP-ribose) polymerase family, member 14	Parp14	2.33	0.000892
17423781	peptidase M20 domain containing 2	Pm20d2	2.33	0.012206
17467209	family with sequence similarity 13, member A	Fam13a	2.33	0.016055
17239919	laminin, alpha 2	Lama2	2.34	0.013226
17439622	1-acylglycerol-3-phosphate O-acyltransferase 9	Agpat9	2.34	0.00944
17439741	AF4/FMR2 family, member 1	Aff1	2.34	0.016672
17468018	hexokinase 2	Hk2	2.34	0.000352
17494651	very large inducible GTPase 1 pseudogene	Gm8979	2.34	0.000874
17368387	predicted gene, 23969 [Source:MGI Symbol;Acc:MGI:5453746]	Gm23969	2.35	0.00546
17277766	thyroid stimulating hormone receptor	Tshr	2.36	0.007139
17294397	leucine rich repeat containing 14B	Lrrc14b	2.36	0.016869
17357072	phospholipase A2, group XVI	Pla2g16	2.36	0.008518
17477774	histidine rich calcium binding protein	Hrc	2.36	0.022433
17512809	haptoglobin	Hp	2.36	0.003179
17357004	MACRO domain containing 1	Macrod1	2.37	0.014941
17252341	XIAP associated factor 1	Xaf1	2.38	0.008362
17254508	carbonic anhydrase 4	Car4	2.38	0.012084
17366953	protein kinase C, theta	Prkcq	2.38	0.003622
17411492	predicted gene 11783	Gm11783	2.38	0.014566
17532540	FYVE and coiled-coil domain containing 1; predicted gene 17021	Fyco1	2.38	0.032752
17227160	protein phosphatase 1, regulatory (inhibitor) subunit 12B	Ppp1r12b	2.39	0.006799
17259078	ring finger protein 213	Rnf213	2.39	0.001979
17312236	GPI-anchored HDL-binding protein 1	Gpihbp1	2.39	0.020842
17358832	interferon-induced protein with tetratricopeptide repeats 1	Ifit1	2.4	0.012001
17409753	amylo-1,6-glucosidase, 4-alpha-glucanotransferase	Agl	2.41	0.007659
17547877	DEP domain containing MTOR-interacting protein	Deptor	2.41	0.006341
17224360	protein kinase, AMP-activated, gamma 3 non-catatlytic subunit	Prkag3	2.42	0.006214
17441351	serine/arginine repetitive matrix 4, opposite strand	Srrm4os	2.42	0.000377
17459038	hect domain and RLD 3	Herc3	2.42	0.012643
17215208	cholinergic receptor, nicotinic, gamma polypeptide	Chrng	2.43	0.003952
17220584	solute carrier family 30, member 10	Slc30a10	2.43	0.002178
17223903	acyl-Coenzyme A dehydrogenase, long-chain	Acadl	2.44	0.006522
17328368	myosin, heavy polypeptide 11, smooth muscle	Myh11	2.44	0.034937
17354739	peroxisome proliferative activated receptor, gamma, coactivator 1 beta	Ppargc1b	2.44	0.016333
17494649	GTPase, very large interferon inducible 1 pseudogene; predicted gene 4070	Gm17757	2.44	0.002741
17229607	Fc receptor, IgG, low affinity IIb	Fcgr2b	2.45	0.016158
17251264	dehydrogenase/reductase (SDR family) member 7C	Dhrs7c	2.45	0.020356
17497718	interferon induced transmembrane protein 3	Ifitm3	2.45	0.006795
17523359	kelch-like 40	Klhl40	2.45	0.00288
17364932	glutamic-oxaloacetic transaminase 1, soluble	Got1	2.46	0.010495
17477670	Harvey rat sarcoma oncogene, subgroup R	Rras	2.46	0.018836
17498323	tumor necrosis factor receptor superfamily, member 23	Tnfrsf23	2.46	0.010587
17504146	coenzyme Q9 homolog (yeast)	Coq9	2.46	0.004304
17535644	plexin B3	Plxnb3	2.46	0.004602
17306696	ER membrane protein complex subunit 9	Emc9	2.47	0.002565
17349209	LIM and senescent cell antigen like domains 2	Lims2	2.47	0.01743
17436043	tripartite motif-containing 54	Trim54	2.47	0.007839
17212301	transmembrane protein 182	Tmem182	2.49	0.037294
17214948	nuclear antigen Sp100	Sp100	2.49	0.006282
17233930	catenin (cadherin associated protein), alpha 3	Ctnna3	2.49	0.002369
17279499	cysteine rich protein 2	Crip2	2.49	0.001394
17293547	fructose bisphosphatase 2	Fbp2	2.49	0.015524
17420064	transcription elongation factor A (SII), 3	Tcea3	2.49	0.003496
17458813	aquaporin 1	Aqp1	2.49	0.0048
17234910	cell division cycle 34	Cdc34	2.5	0.00276
17399460	pre B cell leukemia transcription factor interacting protein 1	Pbxip1	2.5	0.005686
17531080	ring finger protein 123	Rnf123	2.5	0.015062
17403039	uncharacterized LOC102634333	LOC102634333	2.51	0.01459
17549594			2.51	0.004142
17477116	electron transferring flavoprotein, beta polypeptide	Etfb	2.52	0.027255
17487242	RIKEN cDNA A930016O22 gene	A930016O22Rik	2.52	0.001465
17487374	apolipoprotein C-I	Apoc1	2.52	0.040877
17490848	dihydrodiol dehydrogenase (dimeric)	Dhdh	2.52	0.026868
17325686	zinc finger and BTB domain containing 20	Zbtb20	2.53	0.021868
17437385	superoxide dismutase 3, extracellular	Sod3	2.53	0.008596
17448449	predicted gene 15949 [Source:MGI Symbol;Acc:MGI:3801730]	Gm15949	2.53	0.010607
17217678	calcium channel, voltage-dependent, L type, alpha 1S subunit	Cacna1s	2.54	0.018482
17478883	methylmalonyl CoA epimerase	Mcee	2.54	0.004393
17507605	growth arrest specific 6	Gas6	2.54	0.000613
17221436	somatomedin B and thrombospondin, type 1 domain containing	Sbspon	2.56	0.000184
17248213	cytoplasmic polyadenylation element binding protein 4	Cpeb4	2.56	0.005197
17352175	myelin basic protein	Mbp	2.56	0.00282
17506532	dipeptidase 1 (renal)	Dpep1	2.56	0.006712
17281084	egl-9 family hypoxia-inducible factor 3	Egln3	2.57	0.002909
17283675	serine (or cysteine) peptidase inhibitor, clade A, member 3C	Serpina3c	2.57	0.026461
17342483	family with sequence similarity 195, member A	Fam195a	2.57	0.032384
17253037	inositol polyphosphate 5-phosphatase K	Inpp5k	2.58	0.001949
17441453	nitric oxide synthase 1, neuronal	Nos1	2.58	0.015315
17496354	sulfotransferase family 1A, phenol-preferring, member 1	Sult1a1	2.58	0.005065
17233104	blood vessel epicardial substance	Bves	2.6	0.027051
17481057	ADP-ribosyltransferase 1	Art1	2.6	0.011909
17522536	leucine rich repeat containing 2	Lrrc2	2.6	0.040155
17318950	colony stimulating factor 2 receptor, beta 2, low-affinity (granulocyte-macrophage)	Csf2rb2	2.62	0.013255
17457143	aldo-keto reductase family 1, member B10 (aldose reductase)	Akr1b10	2.62	0.002935
17487927	lipase, hormone sensitive	Lipe	2.62	0.013605
17494662	GTPase, very large interferon inducible 1 pseudogene; predicted gene 4070	Gm18853	2.62	0.002384
17318741	myoglobin	Mb	2.63	0.001518
17350378	laeverin	Lvrn	2.64	0.011542
17410022	myozenin 2	Myoz2	2.64	0.034726
17325723	microRNA 568; zinc finger and BTB domain containing 20	Mir568	2.65	0.030739
17411323	acyl-Coenzyme A dehydrogenase, medium chain	Acadm	2.65	0.011997
17445715	CD36 antigen	Cd36	2.65	0.005206
17535572	ATPase, Ca++ transporting, plasma membrane 3	Atp2b3	2.65	0.022288
17337796	phospholipase A2, group VII (platelet-activating factor acetylhydrolase, plasma)	Pla2g7	2.66	0.012134
17500922	PDZ and LIM domain 3	Pdlim3	2.66	0.046877
17517132	crystallin, alpha B	Cryab	2.66	0.001865
17324446	receptor transporter protein 4	Rtp4	2.67	0.000928
17328062	epithelial membrane protein 2	Emp2	2.67	0.004744
17334253	enoyl-Coenzyme A delta isomerase 1	Eci1	2.67	0.014344
17502951	uncharacterized LOC105246804	LOC105246804	2.67	0.033551
17503942	metallothionein 1	Mt1	2.67	0.047082
17419902	myomesin family, member 3	Myom3	2.68	0.002172
17248896	tripartite motif-containing 7	Trim7	2.69	0.017261
17343882	EGF-like domain 8	Egfl8	2.69	0.000412
17386090	sodium channel, voltage-gated, type VII, alpha	Scn7a	2.7	0.003594
17443069	GATS protein-like 2	Gatsl2	2.7	0.011767
17479259	ATP/GTP binding protein-like 1	Agbl1	2.7	0.009168
17519438	myosin VC	Myo5c	2.7	0.032639
17314476	transmembrane protein 117	Tmem117	2.71	0.004615
17461477	LIM and cysteine-rich domains 1	Lmcd1	2.71	0.007771
17474547	reticulon 2 (Z-band associated protein)	Rtn2	2.71	0.010282
17506510	small nucleolar RNA, C/D box 68; ribosomal protein L13	Snord68	2.71	0.003232
17479628	alpha-kinase 3	Alpk3	2.72	0.009573
17378359	acyl-CoA synthetase short-chain family member 2; predicted gene, 39969	Acss2	2.73	0.032269
17235597	ataxia, cerebellar, Cayman type homolog (human), opposite strand	Atcayos	2.74	0.044306
17263223	obscurin, cytoskeletal calmodulin and titin-interacting RhoGEF	Obscn	2.74	0.015292
17443342	heat shock protein 1	Hspb1	2.74	0.016963
17243910	myosin binding protein C, slow-type	Mybpc1	2.75	0.028191
17231248	G0/G1 switch gene 2	G0s2	2.76	0.01504
17499485	myomesin 2	Myom2	2.76	0.007441
17215192	cholinergic receptor, nicotinic, delta polypeptide	Chrnd	2.77	0.007404
17317153	syntrophin, basic 1	Sntb1	2.77	0.006331
17285851	histone cluster 1, H2bc	Hist1h2bc	2.78	0.005689
17536078	dystrophin, muscular dystrophy	Dmd	2.78	0.010438
17255458	phosphatase, orphan 1; zinc finger protein 652	Phospho1	2.79	0.019762
17441037	2-5 oligoadenylate synthetase-like 2	Oasl2	2.79	0.007
17410114	UDP galactosyltransferase 8A	Ugt8a	2.8	0.007796
17231349	protein phosphatase 1, regulatory (inhibitor) subunit 14c	Ppp1r14c	2.81	0.00846
17343278	heat shock transcription factor 2 binding protein	Hsf2bp	2.81	0.000672
17229020	flavin containing monooxygenase 1	Fmo1	2.82	0.001266
17460826	Kruppel-like factor 15	Klf15	2.82	0.00124
17532367	hedgehog acyltransferase-like	Hhatl	2.83	0.029407
17271350	ATP-binding cassette, sub-family A (ABC1), member 8a	Abca8a	2.84	0.007636
17517390	isocitrate dehydrogenase 3 (NAD+) alpha	Idh3a	2.84	0.005074
17251133	myosin, heavy polypeptide 8, skeletal muscle, perinatal	Myh8	2.85	0.046106
17410275	epidermal growth factor	Egf	2.85	0.027791
17356216	pyruvate carboxylase	Pcx	2.87	0.03387
17403224	guanylate binding protein 7	Gbp7	2.87	0.00107
17424105	aquaporin 7	Aqp7	2.87	0.003969
17315743	oncostatin M receptor	Osmr	2.88	0.007487
17221553	polycystic kidney and hepatic disease 1	Pkhd1	2.89	0.001309
17247307	von Willebrand factor C domain containing 2	Vwc2	2.89	0.002319
17307837	epoxide hydrolase 2, cytoplasmic	Ephx2	2.89	0.01626
17361805	nuclear paraspeckle assembly transcript 1 (non-protein coding)	Neat1	2.89	0.010731
17350267	myotilin	Myot	2.91	0.049096
17506042	cadherin 13	Cdh13	2.91	0.028288
17548750			2.91	0.000678
17314577	phosphofructokinase, muscle	Pfkm	2.92	0.008904
17238605	integrin alpha 7	Itga7	2.94	0.002328
17265129	acyl-Coenzyme A dehydrogenase, very long chain	Acadvl	2.94	0.019436
17327502	SH3-binding domain glutamic acid-rich protein	Sh3bgr	2.96	0.027905
17278200	interferon, alpha-inducible protein 27	Ifi27	2.98	0.020734
17268107	sarcoglycan, alpha (dystrophin-associated glycoprotein)	Sgca	3	0.006835
17518512	cartilage intermediate layer protein, nucleotide pyrophosphohydrolase	Cilp	3.01	0.018629
17541528	immunoglobulin superfamily, member 1	Igsf1	3.01	0.02519
17260261	calcium/calmodulin-dependent protein kinase II, beta	Camk2b	3.03	0.012085
17214476	desmin	Des	3.04	0.026963
17221502	junctophilin 1	Jph1	3.04	0.014877
17304901	RIKEN cDNA 3425401B19 gene	3425401B19Rik	3.04	0.03673
17476728	CCAAT/enhancer binding protein (C/EBP), alpha	Cebpa	3.04	0.040543
17487952	carcinoembryonic antigen-related cell adhesion molecule 1	Ceacam1	3.04	0.024347
17461489	caveolin 3	Cav3	3.06	0.008695
17270848	sodium channel, voltage-gated, type IV, alpha	Scn4a	3.07	0.012092
17386396	solute carrier family 25 (mitochondrial carrier, Aralar), member 12	Slc25a12	3.07	0.006921
17481087	stromal interaction molecule 1	Stim1	3.07	0.023968
17445238	klotho	Kl	3.1	0.001895
17548228	CDGSH iron sulfur domain 3B; CDGSH iron sulfur domain 3	Cisd3b	3.1	0.029214
17385422	activin A receptor, type IC	Acvr1c	3.11	0.023442
17489341	myelin-associated glycoprotein	Mag	3.11	0.005489
17345797	apolipoprotein B mRNA editing enzyme, catalytic polypeptide 2	Apobec2	3.12	0.010403
17392690	acyl-CoA synthetase short-chain family member 1	Acss1	3.13	0.009161
17393789	transglutaminase 2, C polypeptide	Tgm2	3.13	0.010143
17291694	serine (or cysteine) peptidase inhibitor, clade B, member 1a	Serpinb1a	3.16	0.000548
17427746	protein kinase, AMP-activated, alpha 2 catalytic subunit	Prkaa2	3.16	0.014239
17537962	proteolipid protein (myelin) 1	Plp1	3.17	0.002615
17394267	troponin C2, fast	Tnnc2	3.18	0.03016
17402039	leucine rich repeat containing 39	Lrrc39	3.18	0.009398
17539560	ankyrin repeat and SOCS box-containing 11	Asb11	3.18	0.005351
17290890	RIKEN cDNA A530099J19 gene	A530099J19Rik	3.19	0.001461
17391094	histidine decarboxylase	Hdc	3.19	0.006116
17403070	alcohol dehydrogenase 1 (class I); predicted gene, 40156	Adh1	3.19	0.007925
17389339	ryanodine receptor 3	Ryr3	3.21	0.005537
17229891	ATPase, Na+/K+ transporting, alpha 2 polypeptide	Atp1a2	3.22	0.022575
17376798	ankyrin repeat and EF-hand domain containing 1; cDNA sequence BC034902	Ankef1	3.22	0.00764
17282970	deiodinase, iodothyronine, type II	Dio2	3.23	0.00118
17448106	sel-1 suppressor of lin-12-like 3 (C. elegans)	Sel1l3	3.24	0.011185
17258642	small nucleolar RNA, C/D box 1B	Snord1b	3.25	0.001753
17350921	RIKEN cDNA F830016B08 gene	F830016B08Rik	3.25	0.029056
17481776	adenosine monophosphate deaminase 3	Ampd3	3.25	0.003702
17317266	F-box protein 32	Fbxo32	3.27	0.001388
17456772	striatin interacting protein 2	Strip2	3.27	0.008622
17530227	nuclear encoded rRNA 5S 89 [Source:MGI Symbol;Acc:MGI:4421937]	n-R5s89	3.29	0.019617
17550428			3.29	0.045133
17233095	popeye domain containing 3	Popdc3	3.32	0.025415
17256870	CD300 antigen like family member G	Cd300lg	3.32	0.012573
17320652	ATP-binding cassette, sub-family D (ALD), member 2	Abcd2	3.32	0.000263
17352036	proline-serine-threonine phosphatase-interacting protein 2	Pstpip2	3.32	0.017201
17283516	ankyrin repeat and SOCS box-containing 2	Asb2	3.33	0.002818
17463501	C-type lectin domain family 2, member d	Clec2d	3.35	0.001027
17449084	insulin-like growth factor binding protein 7	Igfbp7	3.36	0.023357
17513092	fatty acid 2-hydroxylase	Fa2h	3.36	0.003562
17406403	family with sequence similarity 160, member A1	Fam160a1	3.39	0.008919
17489464	sodium channel, voltage-gated, type I, beta	Scn1b	3.4	0.014288
17265096	solute carrier family 2 (facilitated glucose transporter), member 4	Slc2a4	3.43	0.007272
17367963	ectonucleoside triphosphate diphosphohydrolase 2; neural proliferation, differentiation and control 1	Entpd2	3.44	0.001367
17550426			3.46	0.018051
17251001	myosin, heavy polypeptide 2, skeletal muscle, adult	Myh2	3.47	0.039558
17305070	LIM domain binding 3	Ldb3	3.49	0.037392
17298126	leucine-rich repeats and transmembrane domains 1	Lrtm1	3.52	0.025925
17350925	interferon inducible GTPase 1	Iigp1	3.52	0.003337
17524117	hephaestin-like 1	Hephl1	3.54	0.00167
17284049	ankyrin repeat domain 9	Ankrd9	3.58	0.007514
17260192	phosphoglycerate mutase 2	Pgam2	3.59	0.022701
17317278	kelch-like 38	Klhl38	3.6	0.017809
17477946	MEF2 activating motif and SAP domain containing transcriptional regulator	Mamstr	3.6	0.008893
17456414	ankyrin repeat and SOCS box-containing 15	Asb15	3.64	0.00264
17222193	ankyrin repeat domain 23	Ankrd23	3.65	0.034298
17453140	phosphorylase kinase gamma 1	Phkg1	3.65	0.036824
17364484	sorbin and SH3 domain containing 1	Sorbs1	3.67	0.005895
17448001	peroxisome proliferative activated receptor, gamma, coactivator 1 alpha	Ppargc1a	3.67	0.005819
17252183	enolase 3, beta muscle	Eno3	3.68	0.036156
17516469	ubiquitin specific peptidase 2	Usp2	3.73	0.01752
17253258	coronin 6	Coro6	3.75	0.018512
17363559	family with sequence similarity 189, member A2	Fam189a2	3.79	0.012149
17393131	syntrophin, acidic 1	Snta1	3.79	0.008449
17437765	klotho beta	Klb	3.8	0.016992
17401126	adenosine monophosphate deaminase 1	Ampd1	3.81	0.031677
17461942	peroxisome proliferator activated receptor gamma	Pparg	3.81	0.031224
17530243	transferrin	Trf	3.81	0.018399
17397331	predicted gene, 22043 [Source:MGI Symbol;Acc:MGI:5451820]	Gm22043	3.85	0.024463
17411147	interferon-induced protein 44	Ifi44	3.85	0.001637
17545936	carbonic anhydrase 5b, mitochondrial	Car5b	3.85	0.015552
17306937	chymase 1, mast cell	Cma1	3.86	0.001269
17249980	interferon gamma induced GTPase	Igtp	3.89	0.000216
17268120	pyruvate dehydrogenase kinase, isoenzyme 2	Pdk2	3.9	0.033764
17534337	ATPase, (Na+)/K+ transporting, beta 4 polypeptide	Atp1b4	3.91	0.033381
17507573	ADP-ribosylhydrolase like 1	Adprhl1	3.92	0.018474
17280062	lipin 1	Lpin1	3.94	0.024029
17397320	La ribonucleoprotein domain family, member 1B	Larp1b	3.97	0.005745
17342699	inositol hexaphosphate kinase 3	Ip6k3	3.98	0.015819
17439131	starch binding domain 1	Stbd1	3.99	0.006096
17464943	protein phosphatase 1, regulatory (inhibitor) subunit 3A	Ppp1r3a	4.04	0.035248
17489420	FXYD domain-containing ion transport regulator 1	Fxyd1	4.04	0.043695
17417898	claudin 19	Cldn19	4.08	0.000209
17378348	transformation related protein 53 inducible nuclear protein 2	Trp53inp2	4.09	0.016998
17383633	carnitine acetyltransferase	Crat	4.1	0.007955
17408211	phosphodiesterase 4D interacting protein (myomegalin); microRNA 7225	Pde4dip	4.1	0.022677
17496857	cytochrome c oxidase subunit VIa polypeptide 2	Cox6a2	4.1	0.009889
17350806	cortexin 3	Ctxn3	4.11	0.004716
17348902	dystrobrevin alpha	Dtna	4.12	0.017983
17211004	alcohol dehydrogenase, iron containing, 1	Adhfe1	4.13	0.01186
17415815	phosphoglucomutase 2	Pgm2	4.14	0.00837
17391332	myelin and lymphocyte protein, T cell differentiation protein	Mal	4.15	0.003826
17246100	coenzyme Q10 homolog A (yeast)	Coq10a	4.2	0.014328
17454209	gap junction protein, gamma 3	Gjc3	4.2	0.003705
17409261	synaptophysin-like 2	Sypl2	4.22	0.020364
17480729	uncoupling protein 3 (mitochondrial, proton carrier)	Ucp3	4.23	0.002612
17276934	tetratricopeptide repeat domain 9	Ttc9	4.25	0.011541
17424243	expressed sequence AI464131	AI464131	4.25	0.008061
17249990	immunity-related GTPase family M member 2	Irgm2	4.26	0.002016
17451785	transmembrane protein 233	Tmem233	4.36	0.016499
17492810	fibronectin type III and SPRY domain containing 2	Fsd2	4.41	0.011742
17440826	acetyl-Coenzyme A carboxylase beta	Acacb	4.44	0.039931
17485246	troponin T3, skeletal, fast	Tnnt3	4.44	0.048698
17414032	muscle-related coiled-coil protein	Murc	4.45	0.005545
17534646	Rho GTPase activating protein 36	Arhgap36	4.49	0.013243
17404077	peripheral myelin protein 2	Pmp2	4.5	0.002653
17348626	RIKEN cDNA 8430422H06 gene	8430422H06Rik	4.57	0.000661
17232453	triadin	Trdn	4.58	0.038905
17282025	spectrin beta, erythrocytic	Sptb	4.59	0.005793
17289132	RIKEN cDNA A630019I02 gene	A630019I02Rik	4.59	0.006168
17517360	sarcolipin	Sln	4.6	0.010362
17313862	peroxisome proliferator activated receptor alpha	Ppara	4.65	0.007545
17492406	perilipin 1	Plin1	4.65	0.03781
17500996	acyl-CoA synthetase long-chain family member 1	Acsl1	4.73	0.01641
17253215	solute carrier family 6 (neurotransmitter transporter, serotonin), member 4	Slc6a4	4.79	0.003339
17420874	peptidyl arginine deiminase, type II	Padi2	4.79	0.004076
17358214	Kruppel-like factor 9	Klf9	4.8	0.010773
17351811	acetyl-Coenzyme A acyltransferase 2 (mitochondrial 3-oxoacyl-Coenzyme A thiolase)	Acaa2	4.81	0.013028
17310637	family with sequence similarity 134, member B	Fam134b	4.93	0.026304
17503937	metallothionein 2	Mt2	4.96	0.013209
17241553	myopalladin	Mypn	5.01	0.016453
17306147	N-myc downstream regulated gene 2	Ndrg2	5.02	0.044927
17212286	solute carrier family 9 (sodium/hydrogen exchanger), member 2	Slc9a2	5.06	0.017025
17406421	family with sequence similarity 160, member A1; ADP-ribosylation factor interacting protein 1	Fam160a1	5.08	0.014619
17356874	muscle glycogen phosphorylase	Pygm	5.13	0.038744
17264330			5.56	0.026968
17526707	zinc finger and BTB domain containing 16	Zbtb16	5.66	0.032016
17543396	ectodysplasin A2 receptor	Eda2r	5.66	0.002452
17439094	ADP-ribosyltransferase 3	Art3	5.78	0.017906
17509775			5.93	0.000924
17318083	lymphocyte antigen 6 complex, locus A	Ly6a	5.96	0.033367
17262942	solute carrier family 36 (proton/amino acid symporter), member 2	Slc36a2	6.06	0.046252
17230408	aarF domain containing kinase 3	Adck3	6.07	0.021178
17310816	carboxymethylenebutenolidase-like (Pseudomonas)	Cmbl	6.08	0.001137
17485215	troponin I, skeletal, fast 2	Tnni2	6.08	0.04323
17244732	myogenic factor 6	Myf6	6.16	0.007665
17271143	calcium channel, voltage-dependent, gamma subunit 1	Cacng1	6.2	0.012391
17506137	WAP four-disulfide core domain 1	Wfdc1	6.25	0.005816
17222825	nucleic acid binding protein 1	Nabp1	6.36	0.001872
17464654	pyruvate dehydrogenase kinase, isoenzyme 4	Pdk4	6.69	0.008617
17451816	heat shock protein 8	Hspb8	6.73	0.005592
17256697	amine oxidase, copper containing 3	Aoc3	6.75	0.03014
17501633	lipoprotein lipase	Lpl	6.94	0.002446
17493685	predicted gene 4980	Gm4980	7.01	0.014465
17334666	tryptase beta 2	Tpsb2	7.27	0.007399
17294959	cardiomyopathy associated 5	Cmya5	7.81	0.003181
17229121	methyltransferase like 11B	Mettl11b	7.89	0.002792
17400231	tropomodulin 4	Tmod4	8.29	0.014982
17324404	adiponectin, C1Q and collagen domain containing	Adipoq	8.68	0.01586
17501170	ankyrin repeat and SOCs box-containing 5	Asb5	8.83	0.041174
17491354	MAS-related GPR, member B1	Mrgprb1	9.56	0.000209
17362342	lectin, galactose binding, soluble 12	Lgals12	9.69	0.047994
17493432	thyroid hormone responsive	Thrsp	10.02	0.042728
17497704	cytochrome c oxidase subunit VIIIb	Cox8b	10.41	0.024695
17219222	myelin protein zero	Mpz	10.96	0.006206
17469754	cell death-inducing DFFA-like effector c	Cidec	12.49	0.038403
17320499	choline kinase beta; carnitine palmitoyltransferase 1b, muscle; Chkb-Cpt1b readthrough transcript (NMD candidate)	Chkb	12.91	0.042988
17477322	kallikrein 1-related petidase b26	Klk1b26	13.26	0.010569
17498722	resistin	Retn	15.96	0.049384
17234436	coiled-coil-helix-coiled-coil-helix domain containing 10	Chchd10	17.03	0.029531
17528947	muscular LMNA-interacting protein	Mlip	17.74	0.033279
17346528	complement component 3	C3	20.74	0.033569
17303874	myozenin 1	Myoz1	20.76	0.031169
17396152	carbonic anhydrase 3	Car3	23.51	0.036392
17404191			35.6	0.028573
17306960	mast cell protease 4	Mcpt4	42.76	0.02844
17222707	methyltransferase like 21E	Mettl21e	43.12	0.014769

## Sheet: Cav1.1+- E18.5 vs E14.5
DEGs detected in Cav1.1+/- E18.5 vs. E14.5
Transcript Cluster ID	Description	Gene Symbol	Fold Change (linear) (hetCAC18.5 vs. hetCAC14.5)	ANOVA p-value (hetCAC18.5 vs. hetCAC14.5)
17494246	hemoglobin Y, beta-like embryonic chain	Hbb-y	-12.84	0.010192
17470561	ribosomal modification protein rimK-like family member B	Rimklb	-6.18	0.000509
17355332	deleted in colorectal carcinoma	Dcc	-5.07	0.011284
17301582	neurofilament, light polypeptide	Nefl	-4.94	0.000577
17398895	cellular retinoic acid binding protein II	Crabp2	-4.44	0.002022
17423395	solute carrier family 26, member 7	Slc26a7	-4.43	0.000445
17389608	Meis homeobox 2	Meis2	-4.29	0.005547
17322075	keratin 4	Krt4	-4.25	0.026228
17286641	desmoplakin	Dsp	-4.16	0.000599
17469339	predicted gene, 26175 [Source:MGI Symbol;Acc:MGI:5455952]	Gm26175	-3.96	0.005129
17340397	predicted gene 6741 [Source:MGI Symbol;Acc:MGI:3643504]	Gm6741	-3.83	0.001132
17232215	monooxygenase, DBH-like 1	Moxd1	-3.77	0.000899
17234030	transmembrane protein 26	Tmem26	-3.69	0.002502
17224977	delta/notch-like EGF repeat containing	Dner	-3.62	0.001027
17505124	cadherin 3	Cdh3	-3.51	0.001826
17351137	interleukin 17B	Il17b	-3.48	0.007879
17428659	nuclear autoantigenic sperm protein (histone-binding)	Nasp	-3.47	0.000118
17397740	mab-21-like 1 (C. elegans)	Mab21l1	-3.46	0.000782
17231844	PERP, TP53 apoptosis effector	Perp	-3.39	0.00136
17416685	predicted gene, 23138 [Source:MGI Symbol;Acc:MGI:5452915]	Gm23138	-3.38	0.007236
17330918	activated leukocyte cell adhesion molecule	Alcam	-3.31	0.001135
17502789	glycophorin A	Gypa	-3.29	0.001296
17268255	insulin-like growth factor 2 mRNA binding protein 1; microRNA 3063	Igf2bp1	-3.27	0.000838
17529307	elongation of very long chain fatty acids (FEN1/Elo2, SUR4/Elo3, yeast)-like 4	Elovl4	-3.23	0.00047
17494221	hemoglobin, beta adult t chain; hemoglobin, beta adult minor chain	Hbb-bt	-3.2	0.016846
17532755	diacylglycerol kinase kappa	Dgkk	-3.18	0.000408
17545629	phosphate regulating endopeptidase homolog, X-linked	Phex	-3.11	0.022894
17546055	EGF-like-domain, multiple 6	Egfl6	-3.11	0.000612
17430645	Na+/K+ transporting ATPase interacting 1	Nkain1	-3.11	0.000364
17402698	dickkopf homolog 2 (Xenopus laevis)	Dkk2	-3.08	0.000771
17365960	glial cell line derived neurotrophic factor family receptor alpha 1	Gfra1	-2.98	0.000132
17239755	predicted gene, 23130 [Source:MGI Symbol;Acc:MGI:5452907]	Gm23130	-2.97	0.00281
17307738	frizzled homolog 3 (Drosophila)	Fzd3	-2.94	0.000178
17490038	predicted gene 5593	Gm5593	-2.94	0.002593
17304514	small nucleolar RNA, C/D box 19	Snord19	-2.93	0.003469
17289584	centromere protein K	Cenpk	-2.93	0.001349
17479041	a disintegrin-like and metallopeptidase (reprolysin type) with thrombospondin type 1 motif, 17	Adamts17	-2.92	0.000549
17247852	B cell CLL/lymphoma 11A (zinc finger protein)	Bcl11a	-2.88	0.00022
17364597	tolloid-like 2	Tll2	-2.87	7.7e-05
17360863	RIKEN cDNA E330013P04 gene	E330013P04Rik	-2.87	0.007002
17397377	protocadherin 10	Pcdh10	-2.87	0.001837
17411319	small nucleolar RNA, C/D box 45B; Rab geranylgeranyl transferase, b subunit	Snord45b	-2.87	0.000111
17364917	heparanase 2	Hpse2	-2.86	0.000645
17388284	midkine	Mdk	-2.83	0.000825
17219848	exonuclease 1	Exo1	-2.81	1.6e-05
17350740	lamin B1	Lmnb1	-2.81	0.000263
17326756	neural cell adhesion molecule 2	Ncam2	-2.8	0.000386
17412296	Eph receptor A7	Epha7	-2.8	0.00013
17374058	kinesin family member 18A	Kif18a	-2.8	0.007138
17392255	fibronectin leucine rich transmembrane protein 3	Flrt3	-2.8	0.000779
17547813			-2.79	0.001118
17360845	empty spiracles homeobox 2	Emx2	-2.79	0.001957
17310530	cadherin 10	Cdh10	-2.77	0.008326
17398557	secreted frizzled-related protein 2	Sfrp2	-2.77	0.002852
17274021	odd-skipped related 1 (Drosophila)	Osr1	-2.77	0.003279
17518314	predicted gene, 22571 [Source:MGI Symbol;Acc:MGI:5452348]	Gm22571	-2.74	0.013187
17518318	predicted gene, 22455 [Source:MGI Symbol;Acc:MGI:5452232]	Gm22455	-2.73	0.004997
17239751	small nucleolar RNA, H/ACA box 33	Snora33	-2.72	0.002211
17430831	small nucleolar RNA, H/ACA box 73b	Snora73b	-2.72	0.022756
17304512	predicted gene, 24916 [Source:MGI Symbol;Acc:MGI:5454693]	Gm24916	-2.71	0.005399
17353520	cell division cycle 25C	Cdc25c	-2.7	0.000343
17518331	timeless interacting protein	Tipin	-2.7	0.000559
17359212	helicase, lymphoid specific	Hells	-2.7	0.000195
17355565	solute carrier family 14 (urea transporter), member 1	Slc14a1	-2.69	0.003794
17469463	RING1 and YY1 binding protein	Rybp	-2.69	0.001023
17507288	Shc SH2-domain binding protein 1	Shcbp1	-2.68	0.00066
17321966	keratin 5	Krt5	-2.67	0.009562
17505790	contactin associated protein-like 4	Cntnap4	-2.67	0.004804
17533959	eukaryotic translation initiation factor 2, subunit 3, structural gene X-linked	Eif2s3x	-2.67	0.0025
17244973	TRH-degrading enzyme	Trhde	-2.66	0.001183
17361454	cornichon homolog 2 (Drosophila)	Cnih2	-2.65	0.001095
17544164	ribosomal protein S6 kinase polypeptide 6	Rps6ka6	-2.65	0.001502
17430833	small nucleolar RNA, H/ACA box 73a	Snora73a	-2.64	0.018306
17326964	hormonally upregulated Neu-associated kinase	Hunk	-2.62	0.003809
17366121	predicted gene, 26158 [Source:MGI Symbol;Acc:MGI:5455935]	Gm26158	-2.6	0.00016
17309385	dopachrome tautomerase	Dct	-2.6	0.004287
17502583	minichromosome maintenance deficient 5, cell division cycle 46 (S. cerevisiae)	Mcm5	-2.6	0.000433
17429632	major facilitator superfamily domain containing 2A	Mfsd2a	-2.6	3.8e-05
17372307	integrin alpha 4	Itga4	-2.59	7.5e-05
17453776	collagen, type XXVI, alpha 1	Col26a1	-2.59	4.1e-05
17445507	DBF4 homolog (S. cerevisiae)	Dbf4	-2.58	7.2e-05
17501041	caspase 3	Casp3	-2.58	0.003628
17261710	spindle apparatus coiled-coil protein 1	Spdl1	-2.57	0.002402
17354906	piezo-type mechanosensitive ion channel component 2	Piezo2	-2.56	0.000702
17530311	transmembrane protein 108	Tmem108	-2.56	0.002024
17484710	beta-1,4-N-acetyl-galactosaminyl transferase 4	B4galnt4	-2.56	0.002253
17407001	ephrin A3	Efna3	-2.56	0.010456
17466932	TLR4 interactor with leucine-rich repeats	Tril	-2.55	0.001608
17281506	polymerase (DNA directed), epsilon 2 (p59 subunit)	Pole2	-2.55	0.000327
17264588	chromodomain helicase DNA binding protein 3	Chd3	-2.55	0.003487
17378741	neuronatin	Nnat	-2.54	0.000268
17489886	cyclin E1	Ccne1	-2.54	9.62e-07
17545199	leucine-rich repeats and calponin homology (CH) domain containing 2	Lrch2	-2.54	0.001155
17331380	Eph receptor A3	Epha3	-2.53	0.00148
17265470	RIKEN cDNA 6330403K07 gene	6330403K07Rik	-2.53	0.010561
17388725	four jointed box 1 (Drosophila)	Fjx1	-2.53	0.000532
17331401	predicted gene, 22769 [Source:MGI Symbol;Acc:MGI:5452546]	Gm22769	-2.52	0.003814
17535245	AF4/FMR2 family, member 2	Aff2	-2.52	0.006961
17548979	predicted gene 4322 [Source:MGI Symbol;Acc:MGI:3782503]	Gm4322	-2.52	0.002543
17478476	growth arrest specific 2	Gas2	-2.51	0.003644
17291053	histone cluster 1, H4i	Hist1h4i	-2.51	0.02468
17416162	disabled 1	Dab1	-2.5	0.009605
17405075	protocadherin 18	Pcdh18	-2.5	0.000352
17496947	fibroblast growth factor receptor 2	Fgfr2	-2.49	0.033206
17477734	TEA domain family member 2	Tead2	-2.49	0.000185
17545150	lipoma HMGIC fusion partner-like 1	Lhfpl1	-2.49	0.000338
17549906			-2.48	0.017378
17330443	growth associated protein 43	Gap43	-2.48	0.002264
17228667	pappalysin 2	Pappa2	-2.47	0.014269
17547744	CDC28 protein kinase regulatory subunit 2	Cks2	-2.47	0.000201
17548303	predicted gene 12891 [Source:MGI Symbol;Acc:MGI:3649646]	Gm12891	-2.47	0.000201
17548955	CDC28 protein kinase regulatory subunit 2	Cks2	-2.47	0.000201
17316120	cadherin 6	Cdh6	-2.47	0.00205
17396106	leucine rich repeat and coiled-coil domain containing 1	Lrrcc1	-2.46	0.00117
17245059	leucine rich repeat containing G protein coupled receptor 5	Lgr5	-2.46	0.000661
17414651	zinc finger protein 618	Zfp618	-2.46	0.004287
17221633	minichromosome maintenance deficient 3 (S. cerevisiae)	Mcm3	-2.46	0.001001
17219997	kinesin family member 26B	Kif26b	-2.45	0.009222
17537271	zinc finger protein 711	Zfp711	-2.45	0.000363
17403969	RIKEN cDNA 2700069I18 gene	2700069I18Rik	-2.45	0.004162
17277788	fibronectin leucine rich transmembrane protein 2	Flrt2	-2.44	0.005455
17341595	kringle containing transmembrane protein 2	Kremen2	-2.44	0.000494
17409649	vascular cell adhesion molecule 1	Vcam1	-2.44	0.001813
17371941	cell division cycle associated 7	Cdca7	-2.44	0.002074
17444792	ribosomal protein L21	Rpl21	-2.44	0.00209
17258867	baculoviral IAP repeat-containing 5	Birc5	-2.44	0.001211
17391376	budding uninhibited by benzimidazoles 1 homolog (S. cerevisiae)	Bub1	-2.43	0.001462
17358368	doublesex and mab-3 related transcription factor 2	Dmrt2	-2.43	0.002405
17493358	DNA damage-induced apoptosis suppressor	Ddias	-2.43	0.001784
17510701	RNA binding motif protein, X-linked like-1	Rbmxl1	-2.43	0.000243
17406456	mab-21-like 2 (C. elegans)	Mab21l2	-2.42	0.021443
17529930	calsyntenin 2	Clstn2	-2.42	0.003915
17346637	ephrin A5	Efna5	-2.41	0.005192
17218653	growth arrest specific 5	Gas5	-2.41	0.001026
17348276	frizzled homolog 8 (Drosophila)	Fzd8	-2.41	0.000191
17246352	growth differentiation factor 11	Gdf11	-2.41	1.7e-05
17283871	B cell leukemia/lymphoma 11B	Bcl11b	-2.4	0.008629
17389467	gremlin 1	Grem1	-2.4	0.011371
17437302	slit homolog 2 (Drosophila)	Slit2	-2.4	0.002275
17545135	transient receptor potential cation channel, subfamily C, member 5	Trpc5	-2.4	0.000607
17245272	nucleoporin 107	Nup107	-2.4	0.000962
17319887	signal peptide, CUB domain, EGF-like 1	Scube1	-2.39	0.005919
17512153	cadherin 11	Cdh11	-2.39	0.000229
17328610	RIKEN cDNA 2610318N02 gene	2610318N02Rik	-2.39	0.000794
17295757	cyclin B1	Ccnb1	-2.39	0.001039
17519888	interleukin-1 receptor-associated kinase 1 binding protein 1	Irak1bp1	-2.39	0.000802
17249461	follistatin-like 4	Fstl4	-2.39	0.001434
17525503	checkpoint kinase 1	Chek1	-2.39	0.000472
17438530	adhesion G protein-coupled receptor L3	Adgrl3	-2.39	0.000227
17479834	mex3 homolog B (C. elegans)	Mex3b	-2.39	0.000354
17532593	mitochondrially encoded tRNA phenylalanine [Source:MGI Symbol;Acc:MGI:102487]	mt-Tf	-2.39	0.037272
17352265	cerebellin 2 precursor protein	Cbln2	-2.38	0.000537
17309154	potassium channel tetramerisation domain containing 12	Kctd12	-2.38	0.000642
17417407	phosphatidylinositol 3 kinase, regulatory subunit, polypeptide 3 (p55)	Pik3r3	-2.38	0.002064
17256225	cell division cycle 6	Cdc6	-2.37	0.000394
17376274	NOP56 ribonucleoprotein	Nop56	-2.37	0.000218
17274267	nucleolar protein 10	Nol10	-2.37	0.005418
17341378	zinc finger protein 942	Zfp942	-2.37	0.044799
17323828	UDP-GlcNAc:betaGal beta-1,3-N-acetylglucosaminyltransferase 5	B3gnt5	-2.36	0.004801
17363533	MAM domain containing 2	Mamdc2	-2.36	0.004713
17381225	suppressor of variegation 3-9 homolog 2 (Drosophila)	Suv39h2	-2.36	0.000952
17264769	ephrin B3	Efnb3	-2.35	0.032852
17315878	S-phase kinase-associated protein 2 (p45)	Skp2	-2.35	0.00038
17328432	minichromosome maintenance deficient 4 homolog (S. cerevisiae)	Mcm4	-2.35	0.000169
17405247	exosome component 8	Exosc8	-2.34	7.4e-05
17232082	retinoic acid early transcript delta; retinoic acid early transcript 1E; retinoic acid early transcript beta	Raet1d	-2.34	0.009083
17338660	src homology 2 domain-containing transforming protein D	Shd	-2.34	0.003049
17245422	high mobility group AT-hook 2	Hmga2	-2.33	0.005167
17349549	microRNA 1949	Mir1949	-2.32	0.008316
17508609	neuregulin 1	Nrg1	-2.32	0.004646
17377525	GINS complex subunit 1 (Psf1 homolog)	Gins1	-2.32	0.00092
17315960	BRX1, biogenesis of ribosomes, homolog (S. cerevisiae)	Brix1	-2.32	0.002158
17345666	predicted gene 16494 [Source:MGI Symbol;Acc:MGI:3641930]	Gm16494	-2.32	0.01208
17478406	NEL-like 1	Nell1	-2.31	0.001017
17426929	basonuclin 2	Bnc2	-2.31	0.007679
17515950	cell adhesion molecule-related/down-regulated by oncogenes	Cdon	-2.31	0.010051
17413500	GLI pathogenesis-related 2	Glipr2	-2.31	0.001395
17221093	predicted gene 6104 [Source:MGI Symbol;Acc:MGI:3648587]	Gm6104	-2.31	0.003778
17340307	mutS homolog 6 (E. coli)	Msh6	-2.31	0.000141
17394538	sulfatase 2	Sulf2	-2.3	0.002182
17426434	bone morphogenic protein/retinoic acid inducible neural specific 1	Brinp1	-2.3	0.003869
17425525	ferric-chelate reductase 1 like	Frrs1l	-2.3	0.005358
17288231	RING1 and YY1 binding protein, pseudogene	Rybp-ps	-2.3	0.029088
17347493	serine/arginine-rich splicing factor 7	Srsf7	-2.3	0.000268
17413528	maternal embryonic leucine zipper kinase	Melk	-2.3	3.6e-05
17352913	desmocollin 3	Dsc3	-2.29	0.008877
17316390	ribosomal protein L30	Rpl30	-2.29	0.002774
17402386	protease, serine 12 neurotrypsin (motopsin)	Prss12	-2.29	0.004782
17519155	meiosis-specific nuclear structural protein 1	Mns1	-2.29	0.001452
17393562	predicted gene 14230	Gm14230	-2.29	0.002511
17446981	fibronectin type III domain containing 4	Fndc4	-2.29	0.000157
17409963	formin binding protein 1-like	Fnbp1l	-2.29	0.002539
17430192	zinc finger, MYM domain containing 1	Zmym1	-2.29	0.015469
17332656	RIKEN cDNA A630089N07 gene	A630089N07Rik	-2.29	0.041624
17544691	brain expressed X-linked 2	Bex2	-2.28	0.004995
17229128	cDNA sequence BC055324	BC055324	-2.28	0.00017
17412593	serine/arginine-rich splicing factor 12	Srsf12	-2.28	0.004766
17238210	DNA primase, p49 subunit	Prim1	-2.28	0.000724
17534706	PHD finger protein 6	Phf6	-2.28	0.000343
17499849	asparagine-linked glycosylation 11 (alpha-1,2-mannosyltransferase)	Alg11	-2.28	0.001407
17505913	centromere protein N	Cenpn	-2.28	0.000733
17267775	UTP18, small subunit (SSU) processome component, homolog (yeast)	Utp18	-2.28	0.000587
17287330	CDC28 protein kinase regulatory subunit 2	Cks2	-2.28	0.001141
17331987	MIS18 kinetochore protein homolog A (S. pombe)	Mis18a	-2.28	0.005619
17239435	adhesion G protein-coupled receptor G6	Adgrg6	-2.27	0.002375
17405789	tripartite motif-containing 59	Trim59	-2.27	0.001358
17291057	histone cluster 1, H2ag	Hist1h2ag	-2.27	0.008117
17252272	MIS12 homolog (yeast)	Mis12	-2.27	0.005574
17307203	spindle and kinetochore associated complex subunit 3	Ska3	-2.27	0.00246
17434764	sema domain, immunoglobulin domain (Ig), short basic domain, secreted, (semaphorin) 3A	Sema3a	-2.26	0.003901
17229433	NUF2, NDC80 kinetochore complex component, homolog (S. cerevisiae)	Nuf2	-2.26	0.000284
17236531	leukotriene A4 hydrolase	Lta4h	-2.26	0.000286
17288079	predicted gene, 24588 [Source:MGI Symbol;Acc:MGI:5454365]	Gm24588	-2.26	0.011055
17306201	suppressor of Ty 16	Supt16	-2.26	0.000485
17348295	THO complex 1	Thoc1	-2.26	0.002064
17482739	polo-like kinase 1	Plk1	-2.26	0.000113
17401790	AKNA domain containing 1	Aknad1	-2.25	0.001139
17406165	glycine receptor, beta subunit	Glrb	-2.25	0.002662
17305757	WD repeat and HMG-box DNA binding protein 1	Wdhd1	-2.25	0.002766
17352884	cadherin 2	Cdh2	-2.25	0.000924
17307093	RIKEN cDNA C030013D06 gene [Source:MGI Symbol;Acc:MGI:1924626]	C030013D06Rik	-2.25	0.003902
17363220	centrosomal protein 78	Cep78	-2.25	0.000811
17454226	minichromosome maintenance deficient 7 (S. cerevisiae)	Mcm7	-2.25	0.000746
17348879	additional sex combs like 3 (Drosophila)	Asxl3	-2.24	0.0035
17389481	Rho GTPase activating protein 11A	Arhgap11a	-2.24	0.001739
17290447	cholinergic receptor, muscarinic 3, cardiac	Chrm3	-2.24	0.005298
17329380	replication factor C (activator 1) 4	Rfc4	-2.24	0.001089
17293534	pluripotency associated transcript 25	Platr25	-2.24	0.023883
17327331	chromatin assembly factor 1, subunit B (p60)	Chaf1b	-2.24	0.000507
17225169	small nucleolar RNA, H/ACA box 75; nucleolin	Snora75	-2.24	0.000846
17239142	sterile alpha motif domain containing 5	Samd5	-2.24	0.000452
17270162	solute carrier family 4 (anion exchanger), member 1	Slc4a1	-2.24	0.011983
17294302	thyroid hormone receptor interactor 13	Trip13	-2.24	0.000663
17358503	RNA terminal phosphate cyclase-like 1	Rcl1	-2.24	0.007958
17278998			-2.23	0.002346
17224661	Eph receptor A4	Epha4	-2.23	0.001623
17326081	RIKEN cDNA C330027C09 gene	C330027C09Rik	-2.23	0.000539
17534673	serine/threonine kinase 26	Stk26	-2.23	0.009778
17374569	budding uninhibited by benzimidazoles 1 homolog, beta (S. cerevisiae)	Bub1b	-2.23	0.000394
17309457	DAZ interacting protein 1	Dzip1	-2.23	0.000746
17370024	ribosomal protein L12	Rpl12	-2.23	0.00122
17446058	predicted gene, 24009 [Source:MGI Symbol;Acc:MGI:5453786]	Gm24009	-2.23	0.037354
17274959	twist basic helix-loop-helix transcription factor 1	Twist1	-2.22	0.003838
17338701	chromatin assembly factor 1, subunit A (p150)	Chaf1a	-2.22	0.000132
17295745	centromere protein H	Cenph	-2.21	0.000392
17366778	predicted gene, 24761 [Source:MGI Symbol;Acc:MGI:5454538]	Gm24761	-2.21	0.000985
17544196	highly divergent homeobox	Hdx	-2.21	0.00111
17519910	Ttk protein kinase	Ttk	-2.21	0.00312
17228204	DEAH (Asp-Glu-Ala-His) box polypeptide 9	Dhx9	-2.21	0.000918
17238325	timeless circadian clock 1	Timeless	-2.21	0.008573
17309013	protocadherin 9	Pcdh9	-2.21	0.000209
17340411	NDC80 homolog, kinetochore complex component pseudogene	2700099C18Rik	-2.21	0.024814
17342897	serine/arginine-rich protein specific kinase 1	Srpk1	-2.21	0.000254
17393046	RIKEN cDNA 2500004C02 gene	2500004C02Rik	-2.21	0.000548
17419268	predicted gene, 24091 [Source:MGI Symbol;Acc:MGI:5453868]; predicted gene, 23711 [Source:MGI Symbol;Acc:MGI:5453488]	Gm24091	-2.21	0.005668
17419270	predicted gene, 23711	Gm23711	-2.21	0.005668
17425855	INTS3 and NABP interacting protein	Inip	-2.21	0.046038
17451936	T-box 3, opposite strand 1	Tbx3os1	-2.2	0.005547
17253858	ATPase family, AAA domain containing 5	Atad5	-2.2	0.007553
17402681	3-phosphoadenosine 5-phosphosulfate synthase 1	Papss1	-2.2	0.000304
17495667	THUMP domain containing 1	Thumpd1	-2.2	0.00264
17550556			-2.2	0.038649
17529481	T-box18	Tbx18	-2.19	0.001433
17374028	metallophosphoesterase domain containing 2	Mpped2	-2.19	0.017596
17289085	dihydrofolate reductase	Dhfr	-2.19	9.3e-05
17370060	Riken cDNA C130021I20 gene	C130021I20Rik	-2.19	0.002471
17421394	SWI/SNF related, matrix associated, actin dependent regulator of chromatin, subfamily a, member 5 pseudogene	Gm13034	-2.19	0.014178
17545824	Nance-Horan syndrome (human)	Nhs	-2.19	0.00172
17287325	sphingosine-1-phosphate receptor 3	S1pr3	-2.18	0.003254
17399086	mex3 homolog A (C. elegans)	Mex3a	-2.18	0.002294
17511377	neuropilin (NRP) and tolloid (TLL)-like 2	Neto2	-2.18	0.011593
17244661	transmembrane and tetratricopeptide repeat containing 2	Tmtc2	-2.18	0.00231
17275832	Fanconi anemia, complementation group M	Fancm	-2.18	0.00155
17355391	malic enzyme 2, NAD(+)-dependent, mitochondrial	Me2	-2.18	0.001331
17406452	U73B small nuclear RNA	Rnu73b	-2.18	0.001119
17459207	neuron-derived neurotrophic factor	Ndnf	-2.18	0.006701
17528963	leucine rich repeat containing 1	Lrrc1	-2.17	0.001378
17414114	structural maintenance of chromosomes 2	Smc2	-2.17	0.000945
17278470	vaccinia related kinase 1	Vrk1	-2.17	0.002757
17492619	Bloom syndrome, RecQ helicase-like	Blm	-2.17	0.000729
17304493	guanine nucleotide binding protein-like 3 (nucleolar)	Gnl3	-2.17	0.001605
17366758	predicted gene, 24488 [Source:MGI Symbol;Acc:MGI:5454265]; predicted gene, 25701 [Source:MGI Symbol;Acc:MGI:5455478]; predicted gene, 26431 [Source:MGI Symbol;Acc:MGI:5456208]	Gm24488	-2.17	0.000288
17366802	predicted gene, 24488 [Source:MGI Symbol;Acc:MGI:5454265]; predicted gene, 25701 [Source:MGI Symbol;Acc:MGI:5455478]; predicted gene, 26431 [Source:MGI Symbol;Acc:MGI:5456208]	Gm24488	-2.17	0.000288
17366838	predicted gene, 24488 [Source:MGI Symbol;Acc:MGI:5454265]; predicted gene, 25701 [Source:MGI Symbol;Acc:MGI:5455478]; predicted gene, 26431 [Source:MGI Symbol;Acc:MGI:5456208]	Gm24488	-2.17	0.000288
17415715	ubiquitin specific peptidase 1	Usp1	-2.17	0.000473
17459236	MAD2 mitotic arrest deficient-like 1	Mad2l1	-2.17	0.001428
17541343	SWI/SNF related, matrix associated, actin dependent regulator of chromatin, subfamily a, member 1; predicted gene, 38682	Smarca1	-2.16	0.000724
17523095	endo/exonuclease (5-3), endonuclease G-like	Exog	-2.16	0.001941
17303757	DnaJ (Hsp40) homolog, subfamily C, member 9	Dnajc9	-2.16	0.00078
17291005	histone cluster 1, H1b	Hist1h1b	-2.16	0.004133
17301247	PIN2/TERF1 interacting, telomerase inhibitor 1	Pinx1	-2.16	0.000565
17486449	zinc finger protein interacting with K protein 1	Zik1	-2.15	0.001875
17339991	echinoderm microtubule associated protein like 4	Eml4	-2.15	0.002545
17292967	paired-like homeodomain transcription factor 1	Pitx1	-2.15	0.000168
17218907	NME/NM23 family member 7	Nme7	-2.15	0.002585
17375308	WD repeat domain 76	Wdr76	-2.15	0.01484
17430824	small nucleolar RNA host gene 3	Snhg3	-2.15	0.000581
17476916	V-set and transmembrane domain containing 2B	Vstm2b	-2.15	0.000376
17538405			-2.14	0.028241
17280292	predicted gene 9312 [Source:MGI Symbol;Acc:MGI:3647775]	Gm9312	-2.14	0.001253
17390844	myelin basic protein expression factor 2, repressor	Myef2	-2.14	0.012961
17213295	NOP58 ribonucleoprotein	Nop58	-2.14	0.000537
17464672	solute carrier family 25 (mitochondrial carrier, adenine nucleotide translocator), member 13	Slc25a13	-2.14	0.005577
17481102	ribonucleotide reductase M1	Rrm1	-2.14	0.000136
17362521	RIKEN cDNA 5730408K05 gene; microRNA 5136	5730408K05Rik	-2.13	0.002291
17442765	transmembrane protein 132C	Tmem132c	-2.13	0.0075
17350591	synuclein, alpha interacting protein (synphilin)	Sncaip	-2.13	0.00318
17504649	core binding factor beta	Cbfb	-2.13	0.001517
17525418	hydrolethalus syndrome 1	Hyls1	-2.13	0.001368
17416687	predicted gene 12737 [Source:MGI Symbol;Acc:MGI:3651021]	Gm12737	-2.12	0.001115
17495466	ADP-ribosylation factor-like 6 interacting protein 1	Arl6ip1	-2.12	0.002011
17302362	bora, aurora kinase A activator	Bora	-2.12	0.001305
17373857	cleavage stimulation factor, 3 pre-RNA, subunit 3	Cstf3	-2.12	0.000694
17398115	pentraxin related gene	Ptx3	-2.12	0.017353
17478985	small nuclear ribonucleoprotein polypeptide A	Snrpa1	-2.12	0.000845
17338747	ubiquitin-like, containing PHD and RING finger domains, 1	Uhrf1	-2.12	0.000959
17261840	hyaluronan mediated motility receptor (RHAMM)	Hmmr	-2.11	0.001197
17544385	tetraspanin 6	Tspan6	-2.11	0.00087
17437278	non-SMC condensin I complex, subunit G	Ncapg	-2.11	0.005919
17416955	BEN domain containing 5	Bend5	-2.11	0.000112
17324398	small nucleolar RNA, H/ACA box 81; eukaryotic translation initiation factor 4A2	Snora81	-2.11	0.00182
17370745	Rap1 interacting factor 1 homolog (yeast)	Rif1	-2.11	0.00193
17421432	predicted gene 13251	Gm13251	-2.1	0.005413
17457381	tetratricopeptide repeat domain 26	Ttc26	-2.1	0.002268
17539586	Fanconi anemia, complementation group B	Fancb	-2.1	0.000124
17274540	ribonucleotide reductase M2	Rrm2	-2.1	0.001241
17504321	GINS complex subunit 3 (Psf3 homolog)	Gins3	-2.1	0.006453
17238974	F-box protein 5	Fbxo5	-2.1	0.00285
17288035	predicted gene 3325	Gm3325	-2.1	0.000556
17222001	DNA primase, p58 subunit	Prim2	-2.1	0.000156
17339476	WD repeat domain 43	Wdr43	-2.1	3.1e-05
17344114	RIKEN cDNA 1110038B12 gene	1110038B12Rik	-2.1	0.000729
17471201	RAD51 associated protein 1	Rad51ap1	-2.1	0.005588
17543870	zinc finger, DHHC domain containing 15	Zdhhc15	-2.09	0.001612
17222495	LON peptidase N-terminal domain and ring finger 2	Lonrf2	-2.09	0.018017
17325454	polymerase (DNA directed), theta	Polq	-2.09	0.003572
17358962	BTAF1 RNA polymerase II, B-TFIID transcription factor-associated, (Mot1 homolog, S. cerevisiae)	Btaf1	-2.09	9.9e-05
17365243	nucleoplasmin 3	Npm3	-2.09	0.0288
17514822	TATA box binding protein (Tbp)-associated factor, RNA polymerase I, D	Taf1d	-2.09	0.001566
17451930	expressed sequence AW549542	AW549542	-2.08	0.010411
17395041	bone morphogenetic protein 7	Bmp7	-2.08	0.001766
17398416	platelet-derived growth factor, C polypeptide	Pdgfc	-2.08	0.00071
17254249	TAF15 RNA polymerase II, TATA box binding protein (TBP)-associated factor	Taf15	-2.08	0.00416
17469636	RAD18 E3 ubiquitin protein ligase	Rad18	-2.08	0.000752
17466532	protein disulfide isomerase associated 4; microRNA 704	Pdia4	-2.07	0.003547
17548053			-2.07	0.008749
17545121	doublecortin	Dcx	-2.07	0.013029
17550390			-2.07	0.002535
17349544	small nucleolar RNA host gene 4	Snhg4	-2.07	0.001383
17248512	NudC domain containing 2	Nudcd2	-2.07	0.000944
17333686	limb expression 1 homolog (chicken)	Lix1	-2.07	0.000507
17220452	TATA box binding protein (Tbp)-associated factor, RNA polymerase I, A	Taf1a	-2.07	0.000159
17356622	cell division cycle associated 5	Cdca5	-2.07	0.001855
17362559	inner centromere protein	Incenp	-2.07	0.0005
17380637	cadherin 4	Cdh4	-2.07	0.001244
17395933	regulator of G-protein signaling 19	Rgs19	-2.07	0.001627
17469473	SHQ1 homolog (S. cerevisiae)	Shq1	-2.07	0.001035
17500626	tumor suppressor candidate 3	Tusc3	-2.07	0.006953
17466507	enhancer of zeste 2 polycomb repressive complex 2 subunit	Ezh2	-2.06	0.000154
17213139	basic leucine zipper and W2 domains 1	Bzw1	-2.06	0.001988
17221756	opioid growth factor receptor-like 1	Ogfrl1	-2.06	0.020695
17240342	ribosome production factor 2 homolog (S. cerevisiae)	Rpf2	-2.06	0.003941
17242931	transcription factor 3	Tcf3	-2.06	0.000437
17373530	synaptotagmin XIII	Syt13	-2.06	0.007726
17415439	intraflagellar transport 74	Ift74	-2.06	0.005215
17416566	mago homolog, exon junction complex core component	Magoh	-2.06	0.002246
17435245	RIKEN cDNA 2700038G22 gene	2700038G22Rik	-2.06	0.011381
17507857			-2.05	0.007925
17544618	transcription elongation factor A (SII)-like 6	Tceal6	-2.05	0.004583
17365625	sortilin-related VPS10 domain containing receptor 1	Sorcs1	-2.05	0.000663
17328625	stromal cell-derived factor 2-like 1	Sdf2l1	-2.05	0.02143
17409690	RNA 3-terminal phosphate cyclase	Rtca	-2.05	0.005805
17468798	minichromosome maintenance deficient 2 mitotin (S. cerevisiae)	Mcm2	-2.05	0.000387
17535930	dyskeratosis congenita 1, dyskerin	Dkc1	-2.05	0.000289
17544373	protocadherin 19	Pcdh19	-2.05	0.015698
17501292	high mobility group box 2	Hmgb2	-2.04	0.001202
17465080	aminoadipate-semialdehyde synthase	Aass	-2.04	0.002712
17275351	Sec1 family domain containing 1	Scfd1	-2.04	0.002731
17309293	ring finger protein 219	Rnf219	-2.04	0.005275
17364367	nucleolar complex associated 3 homolog (S. cerevisiae)	Noc3l	-2.04	0.00106
17391971	proliferating cell nuclear antigen	Pcna	-2.04	0.000189
17414331	family with sequence similarity 206, member A	Fam206a	-2.04	0.000149
17426890	PC4 and SFRS1 interacting protein 1	Psip1	-2.04	0.00041
17475777	fibrillarin	Fbl	-2.04	0.00015
17512476	predicted gene 5914; agouti related neuropeptide	Gm5914	-2.04	0.014006
17527934	kinesin family member 23	Kif23	-2.04	0.000188
17541618	muscleblind-like 3 (Drosophila)	Mbnl3	-2.04	0.004759
17325671	limbic system-associated membrane protein	Lsamp	-2.03	0.01224
17397268	polo-like kinase 4	Plk4	-2.03	0.00079
17269921	breast cancer 1, early onset	Brca1	-2.03	0.014779
17457465	C-type lectin domain family 2, member L	Clec2l	-2.03	0.009386
17428803	kinesin family member 2C	Kif2c	-2.03	1.1e-05
17385044	Rho family GTPase 3	Rnd3	-2.03	0.000335
17335842	phosphodiesterase 9A	Pde9a	-2.03	0.00193
17353171	tubulin polyglutamylase complex subunit 2	Tpgs2	-2.03	0.000501
17412404	caspase 8 associated protein 2	Casp8ap2	-2.03	0.000525
17491941	aldehyde dehydrogenase family 1, subfamily A3	Aldh1a3	-2.03	0.005199
17497366	early B cell factor 3	Ebf3	-2.03	0.004347
17491741			-2.02	0.005224
17358838	kinesin family member 20B	Kif20b	-2.02	0.001043
17313087	mannoside acetylglucosaminyltransferase 3	Mgat3	-2.02	0.000452
17402052	spindle assembly 6 homolog (C. elegans)	Sass6	-2.02	0.000256
17471222	cyclin D2	Ccnd2	-2.02	0.000737
17222800	solute carrier family 39 (zinc transporter), member 10	Slc39a10	-2.02	0.00123
17237252	nucleosome assembly protein 1-like 1; nucleosome assembly protein 1-like 1 pseudogene	Nap1l1	-2.02	0.000147
17289660	DIM1 dimethyladenosine transferase 1-like (S. cerevisiae)	Dimt1	-2.02	0.000489
17307080	paraspeckle protein 1	Pspc1	-2.02	0.002702
17328884	RAN binding protein 1	Ranbp1	-2.02	0.000823
17496568	kinesin family member 22	Kif22	-2.02	0.004944
17315993	retinoic acid induced 14	Rai14	-2.01	0.001753
17511550	TOX high mobility group box family member 3	Tox3	-2.01	0.001976
17359098	centrosomal protein 55	Cep55	-2.01	0.024578
17376124	solute carrier family 20, member 1	Slc20a1	-2.01	0.005205
17415835	receptor tyrosine kinase-like orphan receptor 1	Ror1	-2.01	0.0107
17419773	stathmin 1	Stmn1	-2.01	0.00159
17439978	cell division cycle 7 (S. cerevisiae)	Cdc7	-2.01	0.000868
17455608	replication factor C (activator 1) 3	Rfc3	-2.01	0.010512
17495223	BTB (POZ) domain containing 10	Btbd10	-2.01	0.004088
17501025	centromere protein U	Cenpu	-2.01	0.001549
17514806	TATA box binding protein (Tbp)-associated factor, RNA polymerase I, D	Taf1d	-2.01	0.000102
17547767			-2.01	0.005954
17543840	expressed sequence C77370	C77370	-2	0.001479
17548090			-2	0.038952
17520034	protease, serine 35	Prss35	-2	0.000657
17541008	small nucleolar RNA, H/ACA box 69	Snora69	-2	0.012589
17454310	glypican 2 (cerebroglycan)	Gpc2	-2	0.002727
17266851	schlafen 9	Slfn9	-2	0.002293
17395016	aurora kinase A	Aurka	-2	3.7e-05
17396733	actin-like 6A	Actl6a	-2	0.000613
17447963	Kv channel interacting protein 4	Kcnip4	-2	0.00623
17506697	ras homolog gene family, member U	Rhou	-2	0.007597
17514789	G protein-coupled receptor 83	Gpr83	-2	0.007183
17541190	cullin 4B	Cul4b	-2	0.0015
17404329	glycogenin	Gyg	2	0.000109
17483242	myosin light chain, phosphorylatable, fast skeletal muscle	Mylpf	2	0.000947
17269995	membrane protein, palmitoylated 3 (MAGUK p55 subfamily member 3)	Mpp3	2	0.010431
17380211	CCCTC-binding factor (zinc finger protein)-like, opposite strand; predicted gene, 40011	Ctcflos	2	0.000431
17260931	microRNA 1933	Mir1933	2	0.027775
17441334	RIKEN cDNA C330018A13 gene	C330018A13Rik	2	0.003559
17410630	predicted gene 5105	Gm5105	2.01	0.023296
17510640	Rho GTPase activating protein 10	Arhgap10	2.01	0.000175
17342403	rhomboid, veinlet-like 1 (Drosophila)	Rhbdl1	2.01	0.00128
17364218	cytoplasmic polyadenylation element binding protein 3	Cpeb3	2.02	0.000138
17278882	microRNA 377	Mir377	2.02	0.001223
17332628	C2 calcium-dependent domain containing 2	C2cd2	2.02	0.005833
17331173	ST3 beta-galactoside alpha-2,3-sialyltransferase 6	St3gal6	2.02	0.001519
17252341	XIAP associated factor 1	Xaf1	2.02	0.000308
17403605	adhesion G protein-coupled receptor L4	Adgrl4	2.02	0.000575
17547877	DEP domain containing MTOR-interacting protein	Deptor	2.02	0.002554
17491068	potassium inwardly rectifying channel, subfamily J, member 11	Kcnj11	2.02	0.000121
17280144	potassium voltage-gated channel, subfamily F, member 1	Kcnf1	2.02	0.00316
17285851	histone cluster 1, H2bc	Hist1h2bc	2.02	0.009167
17338103	cysteine-rich protein 3	Crip3	2.02	0.00315
17376063	zinc finger CCCH type containing 6	Zc3h6	2.02	0.004596
17395057	predicted gene 20490 [Source:MGI Symbol;Acc:MGI:5141955]	Gm20490	2.02	0.000501
17399583	tropomyosin 3, gamma	Tpm3	2.02	0.004494
17407354	S100 calcium binding protein A1	S100a1	2.02	0.001994
17427860	acyl-CoA thioesterase 11	Acot11	2.02	4.6e-05
17322664	SEC14-like lipid binding 5	Sec14l5	2.03	0.004748
17459676	retinol saturase (all trans retinol 13,14 reductase)	Retsat	2.03	0.000103
17380199	RNA binding motif protein 38	Rbm38	2.03	0.002622
17226313	STEAP family member 3	Steap3	2.03	0.002131
17509976	solute carrier family 25, member 42	Slc25a42	2.03	0.008396
17293471			2.03	0.003199
17549606			2.03	0.007932
17313254	melanin-concentrating hormone receptor 1	Mchr1	2.04	2.6e-05
17296317	heat shock protein 3	Hspb3	2.04	0.000942
17467209	family with sequence similarity 13, member A	Fam13a	2.04	0.001808
17225379	ankyrin repeat and SOCS box-containing 18	Asb18	2.04	0.001702
17237451	protein tyrosine phosphatase, receptor type, B	Ptprb	2.04	0.000495
17504707	nucleolar protein 3 (apoptosis repressor with CARD domain)	Nol3	2.04	0.001847
17460665	monoglyceride lipase	Mgll	2.04	0.006758
17526861	dihydrolipoamide S-acetyltransferase (E2 component of pyruvate dehydrogenase complex)	Dlat	2.04	0.000534
17371939			2.04	0.024245
17241308	tetraspanin 15	Tspan15	2.04	0.000907
17271350	ATP-binding cassette, sub-family A (ABC1), member 8a	Abca8a	2.04	0.010873
17274875	nicotinamide phosphoribosyltransferase	Nampt	2.04	0.000899
17534907	predicted gene 2174 [Source:MGI Symbol;Acc:MGI:3780344]	Gm2174	2.04	0.02139
17437385	superoxide dismutase 3, extracellular	Sod3	2.05	0.005524
17337834	regulator of calcineurin 2	Rcan2	2.05	0.019519
17371912	sterile alpha motif and leucine zipper containing kinase AZK	Zak	2.05	0.004422
17301899	succinate-Coenzyme A ligase, ADP-forming, beta subunit; predicted gene, 41209	Sucla2	2.05	0.005595
17424090	predicted gene, 24112 [Source:MGI Symbol;Acc:MGI:5453889]	Gm24112	2.05	0.043006
17424092	predicted gene, 25931 [Source:MGI Symbol;Acc:MGI:5455708]	Gm25931	2.05	0.046732
17459151	predicted gene, 25205 [Source:MGI Symbol;Acc:MGI:5454982]	Gm25205	2.05	0.044901
17278795	predicted gene, 23787 [Source:MGI Symbol;Acc:MGI:5453564]	Gm23787	2.06	0.016043
17503031	protein kinase, cAMP dependent, catalytic, alpha	Prkaca	2.06	0.002738
17251179	myosin, heavy polypeptide 13, skeletal muscle	Myh13	2.06	0.01502
17266520	lectin, galactose binding, soluble 9	Lgals9	2.06	0.012406
17217101	solute carrier family 41, member 1	Slc41a1	2.07	0.001529
17273526	Rab40B, member RAS oncogene family	Rab40b	2.07	0.018598
17407764	prune homolog (Drosophila)	Prune	2.07	0.001311
17461055	predicted gene 15737 [Source:MGI Symbol;Acc:MGI:3783179]	Gm15737	2.07	0.007284
17458813	aquaporin 1	Aqp1	2.08	0.001511
17214368	cytochrome P450, family 27, subfamily a, polypeptide 1	Cyp27a1	2.08	0.001341
17478919	threonyl-tRNA synthetase-like 2	Tarsl2	2.08	0.0031
17490848	dihydrodiol dehydrogenase (dimeric)	Dhdh	2.08	0.005667
17367004	interleukin 15 receptor, alpha chain	Il15ra	2.08	0.000203
17549776			2.09	0.002989
17414250	transmembrane protein 38B	Tmem38b	2.09	0.004212
17297801	predicted gene 2260; predicted gene 2274	Gm2260	2.09	0.000981
17297833	predicted gene 2260; predicted gene 2274	Gm2260	2.09	0.000981
17376276	small nucleolar RNA, C/D box 57; NOP56 ribonucleoprotein	Snord57	2.09	0.045578
17384457	stomatin	Stom	2.09	0.002126
17519778			2.09	0.002778
17211367	microRNA 133b	Mir133b	2.1	0.009557
17234066	ankyrin 3, epithelial	Ank3	2.1	0.000418
17278846	microRNA 487b	Mir487b	2.1	0.004826
17369379	hemicentin 2	Hmcn2	2.1	0.000349
17343918	complement component 4B (Chido blood group)	C4b	2.1	0.003251
17294086	adenylate cyclase 2	Adcy2	2.11	0.00217
17238605	integrin alpha 7	Itga7	2.11	0.015571
17334253	enoyl-Coenzyme A delta isomerase 1	Eci1	2.11	0.003959
17251527	period circadian clock 1	Per1	2.12	0.02114
17542642	deoxyribonuclease 1-like 1	Dnase1l1	2.12	0.002431
17367963	ectonucleoside triphosphate diphosphohydrolase 2; neural proliferation, differentiation and control 1	Entpd2	2.12	0.003797
17530923	leucine-rich single-pass membrane protein 2	Lsmem2	2.12	0.000986
17334419	methionine sulfoxide reductase B1	Msrb1	2.12	0.008057
17335506	peptidase inhibitor 16	Pi16	2.12	0.009651
17361921	transmembrane 7 superfamily member 2	Tm7sf2	2.12	0.006716
17370883	potassium inwardly-rectifying channel, subfamily J, member 3	Kcnj3	2.12	0.00019
17400549	predicted gene 20634 [Source:MGI Symbol;Acc:MGI:5313081]	Gm20634	2.12	0.00189
17278820	microRNA 494	Mir494	2.13	0.000848
17514078	angiotensinogen (serpin peptidase inhibitor, clade A, member 8)	Agt	2.13	0.000217
17212982	aldehyde oxidase 1	Aox1	2.13	0.018238
17379957	predicted gene 14319 [Source:MGI Symbol;Acc:MGI:3649450]	Gm14319	2.13	0.00329
17326394	filamin A interacting protein 1-like	Filip1l	2.13	0.014666
17465636	plexin A4	Plxna4	2.13	0.000865
17278884	microRNA 541	Mir541	2.13	0.005686
17367385	OTU domain containing 1	Otud1	2.13	0.005124
17488458	zinc finger protein 36	Zfp36	2.13	0.000118
17253037	inositol polyphosphate 5-phosphatase K	Inpp5k	2.14	0.002077
17344456	RIKEN cDNA 2310061I04 gene	2310061I04Rik	2.14	0.000598
17429476	potassium voltage-gated channel, subfamily Q, member 4	Kcnq4	2.14	0.005409
17322700	RNA binding protein, fox-1 homolog (C. elegans) 1	Rbfox1	2.14	0.00223
17402996	DNA-damage-inducible transcript 4-like	Ddit4l	2.14	0.01381
17480420	p21 protein (Cdc42/Rac)-activated kinase 1	Pak1	2.14	0.000492
17323299			2.14	0.009908
17278810	microRNA 380	Mir380	2.14	0.006571
17229269	RCSD domain containing 1	Rcsd1	2.14	0.000434
17548123			2.14	0.013734
17236003	t-complex 11 (mouse) like 2	Tcp11l2	2.15	0.004164
17479259	ATP/GTP binding protein-like 1	Agbl1	2.15	0.005971
17373240	protein kinase C and casein kinase substrate in neurons 3	Pacsin3	2.15	0.003089
17231789	taxilin beta	Txlnb	2.15	0.001763
17235320	receptor accessory protein 6	Reep6	2.15	0.038527
17464549	calcitonin receptor	Calcr	2.15	0.005111
17516594	solute carrier family 37 (glucose-6-phosphate transporter), member 4	Slc37a4	2.15	0.002283
17517132	crystallin, alpha B	Cryab	2.15	0.002839
17356412	RIKEN cDNA 4930481A15 gene	4930481A15Rik	2.16	0.003032
17347633	predicted gene, 19689	Gm19689	2.16	0.000383
17432808	mitofusin 2	Mfn2	2.16	0.001833
17224540	tubulin, alpha 4A	Tuba4a	2.16	0.009745
17476728	CCAAT/enhancer binding protein (C/EBP), alpha	Cebpa	2.16	0.013317
17480048	malic enzyme 3, NADP(+)-dependent, mitochondrial	Me3	2.16	0.000354
17290865	ependymin related protein 1 (zebrafish)	Epdr1	2.17	0.005317
17327737	sarcalumenin	Srl	2.17	0.002905
17381078	uridine-cytidine kinase 1-like 1, opposite strand	Uckl1os	2.17	0.000692
17278858	microRNA 485; miRNA containing gene	Mir485	2.17	0.004385
17230078	myeloid cell nuclear differentiation antigen; interferon activated gene 204	Mnda	2.17	0.042025
17491368	cysteine and glycine-rich protein 3	Csrp3	2.17	0.007796
17390079	phospholipase A2, group IVE	Pla2g4e	2.17	0.027563
17267418			2.17	0.018042
17361141	carnosine synthase 1	Carns1	2.18	0.001284
17256924	ankyrin repeat and SOCS box-containing 16	Asb16	2.18	0.001412
17278753	predicted gene, 23912 [Source:MGI Symbol;Acc:MGI:5453689]	Gm23912	2.18	0.000618
17214487	SPEG complex locus	Speg	2.18	0.000823
17349209	LIM and senescent cell antigen like domains 2	Lims2	2.18	0.000626
17215750	kelch-like 30	Klhl30	2.18	0.002314
17328368	myosin, heavy polypeptide 11, smooth muscle	Myh11	2.18	0.000822
17333347	superoxide dismutase 2, mitochondrial	Sod2	2.18	0.002594
17369911	adenylate kinase 1	Ak1	2.19	0.001898
17468501	RIKEN cDNA 2310040G24 gene	2310040G24Rik	2.19	0.000511
17548916			2.19	0.014003
17481057	ADP-ribosyltransferase 1	Art1	2.19	0.001314
17223903	acyl-Coenzyme A dehydrogenase, long-chain	Acadl	2.19	0.000833
17545936	carbonic anhydrase 5b, mitochondrial	Car5b	2.19	0.025334
17479736	transmembrane 6 superfamily member 1	Tm6sf1	2.2	0.00404
17292390	WNK lysine deficient protein kinase 2	Wnk2	2.2	0.000531
17313677	patatin-like phospholipase domain containing 3	Pnpla3	2.2	0.037935
17307837	epoxide hydrolase 2, cytoplasmic	Ephx2	2.2	0.008263
17514333	predicted gene 10719 [Source:MGI Symbol;Acc:MGI:3641690]	Gm10719	2.2	0.029264
17534960	four and a half LIM domains 1	Fhl1	2.2	0.002113
17513995	actin, alpha 1, skeletal muscle	Acta1	2.21	0.006085
17222668	methyltransferase like 21C	Mettl21c	2.21	0.004884
17371847	pyruvate dehydrogenase kinase, isoenzyme 1	Pdk1	2.21	0.000219
17449108	trans-2,3-enoyl-CoA reductase-like	Tecrl	2.21	0.009243
17467154	protein phosphatase 1K (PP2C domain containing)	Ppm1k	2.21	0.001776
17550474			2.21	0.043339
17390810	glycine amidinotransferase (L-arginine:glycine amidinotransferase)	Gatm	2.22	0.003205
17233210	leukocyte immunoglobulin-like receptor, subfamily B, member 4B	Lilr4b	2.22	0.001005
17321626	predicted gene 16537	Gm16537	2.22	0.012228
17288616	tubulin polymerization promoting protein	Tppp	2.23	0.007541
17322429	protein phosphatase 1, regulatory (inhibitor) subunit 1A	Ppp1r1a	2.23	0.004836
17230087	interferon activated gene 203	Ifi203	2.23	0.013235
17297759	annexin A11; predicted gene 2260; predicted gene 2274	Anxa11	2.23	0.000744
17253656	vitronectin	Vtn	2.23	0.012535
17386090	sodium channel, voltage-gated, type VII, alpha	Scn7a	2.24	0.020684
17301055	C1q and tumor necrosis factor related protein 9	C1qtnf9	2.24	0.003357
17478883	methylmalonyl CoA epimerase	Mcee	2.24	0.003994
17453055	RIKEN cDNA 5930412G12 gene	5930412G12Rik	2.24	0.000628
17283955	predicted gene, 26906 [Source:MGI Symbol;Acc:MGI:5477400]	Gm26906	2.24	0.00833
17517112			2.25	0.005135
17457913	chloride channel, voltage-sensitive 1	Clcn1	2.25	0.000451
17469360	leiomodin 3 (fetal)	Lmod3	2.25	0.005971
17548748	uncharacterized LOC105243404	LOC105243404	2.25	0.000861
17549566			2.25	0.001643
17331960			2.26	0.025768
17476620	predicted pseudogene 6669 [Source:MGI Symbol;Acc:MGI:3646884]	Gm6669	2.26	0.00419
17303882	synaptopodin 2-like	Synpo2l	2.26	0.000568
17278755	microRNA 370	Mir370	2.26	0.004198
17371451	kelch-like 41	Klhl41	2.26	0.006958
17394015	junctophilin 2	Jph2	2.26	0.000358
17278878	microRNA 154	Mir154	2.26	0.002845
17507605	growth arrest specific 6	Gas6	2.27	0.006251
17420064	transcription elongation factor A (SII), 3	Tcea3	2.27	0.004401
17278702	microRNA 431	Mir431	2.27	0.001278
17530653	aminolevulinic acid synthase 1	Alas1	2.27	0.000263
17468551	annexin A4	Anxa4	2.27	0.000128
17229629	succinate dehydrogenase complex, subunit C, integral membrane protein	Sdhc	2.28	3.7e-05
17381892	3-hydroxyacyl-CoA dehydratase 1	Hacd1	2.28	0.001115
17464282	sarcospan	Sspn	2.28	0.000379
17244506	mitochondrial ribosomal protein L42	Mrpl42	2.28	0.00093
17370043	angiopoietin-like 2	Angptl2	2.29	0.002444
17318013	Ly6/neurotoxin 1	Lynx1	2.29	0.007999
17278690	microRNA 493	Mir493	2.29	0.018264
17268691	calcium channel, voltage-dependent, beta 1 subunit	Cacnb1	2.29	0.001352
17500380	dual specificity phosphatase 26 (putative)	Dusp26	2.3	0.019344
17267584	A kinase (PRKA) anchor protein 1	Akap1	2.3	0.000106
17508907	mitochondrial tumor suppressor 1	Mtus1	2.3	0.000397
17478044	transmembrane protein 143	Tmem143	2.31	0.001627
17420777	aldehyde dehydrogenase 4 family, member A1	Aldh4a1	2.32	0.000363
17292562	sema domain, immunoglobulin domain (Ig), transmembrane domain (TM) and short cytoplasmic domain, (semaphorin) 4D	Sema4d	2.32	0.007534
17354739	peroxisome proliferative activated receptor, gamma, coactivator 1 beta	Ppargc1b	2.32	0.001129
17263223	obscurin, cytoskeletal calmodulin and titin-interacting RhoGEF	Obscn	2.32	0.00245
17396238	predicted gene, 23330 [Source:MGI Symbol;Acc:MGI:5453107]	Gm23330	2.32	0.000537
17278842	microRNA 300	Mir300	2.33	0.010759
17272785	lectin, galactoside-binding, soluble, 3 binding protein	Lgals3bp	2.33	0.038794
17533207	Kell blood group precursor (McLeod phenotype) homolog	Xk	2.33	0.001396
17222825	nucleic acid binding protein 1	Nabp1	2.33	0.002035
17318160	v-maf musculoaponeurotic fibrosarcoma oncogene family, protein A (avian)	Mafa	2.33	0.004035
17521300	cytokine inducible SH2-containing protein	Cish	2.34	0.000842
17440312	fibroblast growth factor receptor-like 1	Fgfrl1	2.34	0.000246
17411492	predicted gene 11783	Gm11783	2.34	0.011262
17278850	microRNA 544	Mir544	2.34	0.003596
17229948	dual specificity phosphatase 23	Dusp23	2.34	0.00107
17460826	Kruppel-like factor 15	Klf15	2.34	0.000617
17530243	transferrin	Trf	2.34	0.00485
17400048	RAR-related orphan receptor gamma	Rorc	2.35	0.012063
17436877	actin-binding LIM protein 2	Ablim2	2.35	0.002257
17300544	fat storage-inducing transmembrane protein 1	Fitm1	2.35	0.00361
17432256	solute carrier family 25, member 34	Slc25a34	2.36	0.000367
17527532	mannose phosphate isomerase	Mpi	2.36	0.000166
17475787	dual-specificity tyrosine-(Y)-phosphorylation regulated kinase 1b	Dyrk1b	2.36	0.004293
17521314	RIKEN cDNA 6430571L13 gene	6430571L13Rik	2.36	0.004155
17326987	melanocortin 2 receptor accessory protein	Mrap	2.36	0.002114
17318403	predicted gene, 25720 [Source:MGI Symbol;Acc:MGI:5455497]	Gm25720	2.36	0.04846
17380764	microRNA 133a-2	Mir133a-2	2.36	0.001384
17549502			2.36	0.001967
17549654			2.36	0.001967
17234910	cell division cycle 34	Cdc34	2.37	7.4e-05
17231248	G0/G1 switch gene 2	G0s2	2.37	1.8e-05
17438969	platelet factor 4	Pf4	2.37	0.00109
17533454	predicted gene, 25246 [Source:MGI Symbol;Acc:MGI:5455023]	Gm25246	2.37	0.028826
17549392			2.37	0.019931
17242842	guanidinoacetate methyltransferase	Gamt	2.38	0.000239
17493875	purinergic receptor P2Y, G-protein coupled 2	P2ry2	2.38	0.004731
17462663	microfibrillar associated protein 5	Mfap5	2.38	0.010986
17302429	LIM domain only 7	Lmo7	2.38	0.004039
17217678	calcium channel, voltage-dependent, L type, alpha 1S subunit	Cacna1s	2.38	0.001529
17217048	RAB7B, member RAS oncogene family	Rab7b	2.38	0.011147
17461942	peroxisome proliferator activated receptor gamma	Pparg	2.39	0.026512
17342483	family with sequence similarity 195, member A	Fam195a	2.39	0.002461
17303625	nuclear receptor subfamily 1, group D, member 2	Nr1d2	2.4	0.00117
17361805	nuclear paraspeckle assembly transcript 1 (non-protein coding)	Neat1	2.4	0.000108
17383886	RIKEN cDNA 1110008P14 gene	1110008P14Rik	2.4	6.4e-05
17424105	aquaporin 7	Aqp7	2.4	0.000308
17255853	CDGSH iron sulfur domain 3	Cisd3	2.4	0.006717
17477811	glycogen synthase 1, muscle	Gys1	2.41	3.6e-05
17303964	dual specificity phosphatase 13	Dusp13	2.41	0.000166
17278860	miRNA containing gene; microRNA 410; microRNA 412; microRNA 369	Mirg	2.41	0.000948
17357004	MACRO domain containing 1	Macrod1	2.41	0.002947
17532540	FYVE and coiled-coil domain containing 1; predicted gene 17021	Fyco1	2.41	0.002695
17312341	glutamate receptor, ionotropic, N-methyl D-aspartate-associated protein 1 (glutamate binding)	Grina	2.42	0.000845
17364208	protein phosphatase 1, regulatory (inhibitor) subunit 3C	Ppp1r3c	2.42	0.000537
17401041	calsequestrin 2	Casq2	2.42	0.004012
17307446	sarcoglycan, gamma (dystrophin-associated glycoprotein)	Sgcg	2.42	0.002159
17522439	myosin, light polypeptide 3	Myl3	2.42	0.008208
17483568	tripartite motif-containing 72	Trim72	2.42	0.001555
17539110	small muscle protein, X-linked	Smpx	2.43	0.004834
17387305	frizzled-related protein	Frzb	2.43	0.005456
17502951	uncharacterized LOC105246804	LOC105246804	2.43	0.001561
17250500	mitochondrial elongation factor 2	Mief2	2.44	0.009038
17517727	cytochrome c oxidase subunit Va	Cox5a	2.44	0.001404
17420154	wingless-type MMTV integration site family, member 4	Wnt4	2.44	0.000201
17433898			2.44	0.010128
17549588			2.44	0.002783
17549860			2.44	0.002783
17249829			2.45	0.002494
17230252	RIKEN cDNA 2310043L19 gene	2310043L19Rik	2.46	0.005841
17468747	kelch repeat and BTB (POZ) domain containing 12	Kbtbd12	2.46	0.001038
17445089	furry homolog (Drosophila)	Fry	2.46	0.00043
17306692	predicted gene 15932 [Source:MGI Symbol;Acc:MGI:3802106]	Gm15932	2.46	0.004739
17306696	ER membrane protein complex subunit 9	Emc9	2.47	0.003217
17354599	myozenin 3	Myoz3	2.48	0.005669
17347801	prolyl endopeptidase-like	Prepl	2.48	0.001371
17436043	tripartite motif-containing 54	Trim54	2.48	0.003841
17464718	asparagine synthetase	Asns	2.48	0.023374
17426621	RIKEN cDNA 2310002L09 gene	2310002L09Rik	2.49	8.6e-05
17233930	catenin (cadherin associated protein), alpha 3	Ctnna3	2.49	0.001138
17476639	predicted pseudogene 5327 [Source:MGI Symbol;Acc:MGI:3647424]	Gm5327	2.49	0.007564
17291694	serine (or cysteine) peptidase inhibitor, clade B, member 1a	Serpinb1a	2.49	0.002415
17278844	microRNA 381	Mir381	2.49	0.003654
17443069	GATS protein-like 2	Gatsl2	2.5	0.001933
17364484	sorbin and SH3 domain containing 1	Sorbs1	2.5	0.000895
17283675	serine (or cysteine) peptidase inhibitor, clade A, member 3C	Serpina3c	2.5	0.030597
17463501	C-type lectin domain family 2, member d	Clec2d	2.51	3.5e-05
17410022	myozenin 2	Myoz2	2.51	0.002054
17442909	glioblastoma amplified sequence	Gbas	2.51	0.002367
17346136	perilipin 5	Plin5	2.51	0.001328
17363757	RIKEN cDNA 4430402I18 gene	4430402I18Rik	2.52	0.001062
17457143	aldo-keto reductase family 1, member B10 (aldose reductase)	Akr1b10	2.52	0.000512
17492406	perilipin 1	Plin1	2.52	0.001039
17316775	actin-binding Rho activating protein	Abra	2.52	0.004329
17472955	transmembrane and tetratricopeptide repeat containing 1	Tmtc1	2.53	0.001167
17227160	protein phosphatase 1, regulatory (inhibitor) subunit 12B	Ppp1r12b	2.53	0.000857
17253258	coronin 6	Coro6	2.53	0.005928
17333320	MAS-related GPR, member H	Mrgprh	2.54	5.5e-05
17375006	glucosidase, alpha; neutral C; calpain 3	Ganc	2.55	0.000525
17397288	predicted gene 2011; RIKEN cDNA 3110057O12 gene	Gm2011	2.55	0.000235
17350378	laeverin	Lvrn	2.55	0.008737
17278200	interferon, alpha-inducible protein 27	Ifi27	2.55	0.004086
17504146	coenzyme Q9 homolog (yeast)	Coq9	2.55	0.000306
17462843	CD163 antigen	Cd163	2.55	0.000294
17547505			2.55	0.001002
17240303	RIKEN cDNA G630090E17 gene	G630090E17Rik	2.56	0.000414
17413770	tropomodulin 1	Tmod1	2.56	0.007811
17370273			2.56	0.00022
17523566	C-type lectin domain family 3, member b	Clec3b	2.57	0.007015
17456772	striatin interacting protein 2	Strip2	2.57	0.000562
17278696	microRNA 665	Mir665	2.57	0.002247
17491354	MAS-related GPR, member B1	Mrgprb1	2.57	0.00642
17215697	receptor (calcitonin) activity modifying protein 1	Ramp1	2.58	0.000647
17325592	popeye domain containing 2	Popdc2	2.58	0.00141
17494649	GTPase, very large interferon inducible 1 pseudogene; predicted gene 4070	Gm17757	2.58	0.049945
17437836	cholinergic receptor, nicotinic, alpha polypeptide 9	Chrna9	2.58	0.00044
17530863	mitogen-activated protein kinase-activated protein kinase 3	Mapkapk3	2.59	0.000885
17324446	receptor transporter protein 4	Rtp4	2.59	0.021048
17249980	interferon gamma induced GTPase	Igtp	2.59	0.005942
17519438	myosin VC	Myo5c	2.6	0.002751
17351952	ST8 alpha-N-acetyl-neuraminide alpha-2,8-sialyltransferase 5	St8sia5	2.6	0.003646
17312396	cytochrome c-1	Cyc1	2.61	7.2e-05
17315305	insulin-like growth factor binding protein 6	Igfbp6	2.61	0.00143
17313394	aconitase 2, mitochondrial	Aco2	2.61	0.000401
17410275	epidermal growth factor	Egf	2.61	0.004026
17403039	uncharacterized LOC102634333	LOC102634333	2.62	0.008318
17496408	aldolase A, fructose-bisphosphate	Aldoa	2.62	0.001866
17243102	junctional sarcoplasmic reticulum protein 1	Jsrp1	2.63	1.2e-05
17342029	NADH dehydrogenase (ubiquinone) 1 beta subcomplex, 10	Ndufb10	2.63	8.6e-05
17233303			2.63	0.016305
17449084	insulin-like growth factor binding protein 7	Igfbp7	2.64	0.002081
17439741	AF4/FMR2 family, member 1	Aff1	2.64	8.5e-05
17282309	solute carrier family 8 (sodium/calcium exchanger), member 3	Slc8a3	2.64	0.000369
17519573	kelch-like 31	Klhl31	2.64	0.003366
17302936	integrin, beta-like 1	Itgbl1	2.65	0.026731
17445238	klotho	Kl	2.65	0.001559
17278694	microRNA 540	Mir540	2.66	0.005859
17265129	acyl-Coenzyme A dehydrogenase, very long chain	Acadvl	2.66	5e-06
17304901	RIKEN cDNA 3425401B19 gene	3425401B19Rik	2.66	0.004592
17403070	alcohol dehydrogenase 1 (class I); predicted gene, 40156	Adh1	2.67	0.002233
17411323	acyl-Coenzyme A dehydrogenase, medium chain	Acadm	2.67	0.00012
17535572	ATPase, Ca++ transporting, plasma membrane 3	Atp2b3	2.68	0.002403
17480729	uncoupling protein 3 (mitochondrial, proton carrier)	Ucp3	2.68	0.002386
17396765	ubiquitin specific peptidase 13 (isopeptidase T-3)	Usp13	2.68	0.0014
17532264	xin actin-binding repeat containing 1	Xirp1	2.68	0.003097
17214476	desmin	Des	2.69	0.001413
17477946	MEF2 activating motif and SAP domain containing transcriptional regulator	Mamstr	2.69	0.001506
17357072	phospholipase A2, group XVI	Pla2g16	2.69	0.000559
17375045	calpain 3	Capn3	2.69	0.003112
17516469	ubiquitin specific peptidase 2	Usp2	2.7	0.004651
17236227	5-nucleotidase domain containing 3	Nt5dc3	2.7	0.000134
17364192	RIKEN cDNA 1500017E21 gene	1500017E21Rik	2.7	0.001164
17222193	ankyrin repeat domain 23	Ankrd23	2.7	0.01124
17470074	transmembrane protein 72	Tmem72	2.71	0.001652
17278880	microRNA 496a	Mir496a	2.72	0.00381
17290263	aldo-keto reductase family 1, member C18	Akr1c18	2.72	0.006912
17278713	microRNA 136	Mir136	2.72	0.001347
17550426			2.73	8e-05
17278848	microRNA 539	Mir539	2.74	0.00158
17235018	complement factor D (adipsin)	Cfd	2.74	0.006016
17343710	histocompatibility 2, K1, K region; histocompatibility 2, D region locus 1	H2-K1	2.74	0.029236
17278886	microRNA 409	Mir409	2.74	0.001927
17268107	sarcoglycan, alpha (dystrophin-associated glycoprotein)	Sgca	2.75	0.002241
17468018	hexokinase 2	Hk2	2.75	0.0005
17320652	ATP-binding cassette, sub-family D (ALD), member 2	Abcd2	2.75	0.019632
17302869	citrate lyase beta like	Clybl	2.76	0.000814
17474547	reticulon 2 (Z-band associated protein)	Rtn2	2.76	0.001267
17440711	RIKEN cDNA 1700095B10 gene	1700095B10Rik	2.77	0.002605
17339395	myomesin 1	Myom1	2.77	0.003079
17445715	CD36 antigen	Cd36	2.77	0.006833
17497421	BCL2/adenovirus E1B interacting protein 3	Bnip3	2.77	0.000137
17287148	extracellular matrix protein 2, female organ and adipocyte specific	Ecm2	2.78	0.001511
17270848	sodium channel, voltage-gated, type IV, alpha	Scn4a	2.79	0.000809
17227077	proline arginine-rich end leucine-rich repeat	Prelp	2.8	0.005276
17248213	cytoplasmic polyadenylation element binding protein 4	Cpeb4	2.81	0.000678
17365098	stearoyl-Coenzyme A desaturase 1	Scd1	2.81	0.01173
17391094	histidine decarboxylase	Hdc	2.82	0.011884
17230484	epoxide hydrolase 1, microsomal	Ephx1	2.82	0.00258
17528247	kelch repeat and BTB (POZ) domain containing 13	Kbtbd13	2.82	0.002854
17501228			2.84	0.002027
17284170	RIKEN cDNA 2010107E04 gene	2010107E04Rik	2.84	0.007967
17534489	proline rich 32	Prr32	2.85	0.002077
17315178	nuclear receptor subfamily 4, group A, member 1	Nr4a1	2.86	0.00037
17364474	PDZ and LIM domain 1 (elfin)	Pdlim1	2.86	0.00045
17253215	solute carrier family 6 (neurotransmitter transporter, serotonin), member 4	Slc6a4	2.86	0.002382
17286973	guanosine monophosphate reductase	Gmpr	2.86	0.000107
17399460	pre B cell leukemia transcription factor interacting protein 1	Pbxip1	2.87	0.000596
17280836	leucine-rich single-pass membrane protein 1	Lsmem1	2.87	0.003058
17314476	transmembrane protein 117	Tmem117	2.87	0.003373
17522536	leucine rich repeat containing 2	Lrrc2	2.87	0.005351
17241553	myopalladin	Mypn	2.89	0.001431
17283958	retrotransposon-like 1; microRNA 3071	Rtl1	2.9	0.000362
17461489	caveolin 3	Cav3	2.9	0.005358
17437765	klotho beta	Klb	2.9	0.007777
17394267	troponin C2, fast	Tnnc2	2.91	0.000883
17273159	protein phosphatase 1, regulatory subunit 27	Ppp1r27	2.91	0.001751
17421867	G protein-coupled receptor 157	Gpr157	2.92	0.000368
17243910	myosin binding protein C, slow-type	Mybpc1	2.92	0.005038
17380222	phosphoenolpyruvate carboxykinase 1, cytosolic	Pck1	2.93	0.019896
17326567	glucan (1,4-alpha-), branching enzyme 1	Gbe1	2.94	0.000291
17510983			2.96	0.00019
17255987	titin-cap	Tcap	2.97	0.000706
17227083			2.97	0.00335
17278830	microRNA 495	Mir495	2.98	0.000719
17406423	glycosyltransferase 28 domain containing 2; family with sequence similarity 160, member A1; ADP-ribosylation factor interacting protein 1	Glt28d2	2.98	0.001879
17257444	angiotensin I converting enzyme (peptidyl-dipeptidase A) 1	Ace	2.99	0.002429
17459038	hect domain and RLD 3	Herc3	2.99	0.001143
17212301	transmembrane protein 182	Tmem182	3	0.003553
17448735	SLAIN motif family, member 2	Slain2	3.01	0.002438
17409753	amylo-1,6-glucosidase, 4-alpha-glucanotransferase	Agl	3.01	0.003082
17536078	dystrophin, muscular dystrophy	Dmd	3.01	0.002486
17277766	thyroid stimulating hormone receptor	Tshr	3.02	0.011899
17318950	colony stimulating factor 2 receptor, beta 2, low-affinity (granulocyte-macrophage)	Csf2rb2	3.02	0.006713
17305070	LIM domain binding 3	Ldb3	3.04	0.004257
17315482	predicted gene 4544	Gm4544	3.04	0.003943
17497718	interferon induced transmembrane protein 3	Ifitm3	3.05	0.003835
17352862	aquaporin 4	Aqp4	3.05	0.016494
17538096	ring finger protein 128	Rnf128	3.05	0.001451
17251264	dehydrogenase/reductase (SDR family) member 7C	Dhrs7c	3.06	0.000727
17278692	microRNA 337	Mir337	3.06	0.005783
17534646	Rho GTPase activating protein 36	Arhgap36	3.09	0.003734
17259534	solute carrier family 16 (monocarboxylic acid transporters), member 3	Slc16a3	3.09	0.000315
17507573	ADP-ribosylhydrolase like 1	Adprhl1	3.09	0.002342
17389339	ryanodine receptor 3	Ryr3	3.1	0.002081
17345797	apolipoprotein B mRNA editing enzyme, catalytic polypeptide 2	Apobec2	3.11	0.000986
17339876	glutaminyl-peptide cyclotransferase (glutaminyl cyclase)	Qpct	3.11	0.006866
17278806	microRNA 411	Mir411	3.12	0.006184
17477670	Harvey rat sarcoma oncogene, subgroup R	Rras	3.13	0.001789
17283516	ankyrin repeat and SOCS box-containing 2	Asb2	3.13	0.000495
17548750			3.14	0.000424
17406403	family with sequence similarity 160, member A1	Fam160a1	3.14	0.000543
17407829	ADAMTS-like 4	Adamtsl4	3.15	0.000624
17481087	stromal interaction molecule 1	Stim1	3.15	0.000265
17407956	carbonic anhydrase 14	Car14	3.16	0.002221
17506042	cadherin 13	Cdh13	3.16	0.002486
17401142			3.18	0.000452
17273253	myeloid-associated differentiation marker-like 2	Myadml2	3.18	0.00058
17451251	myosin XVIIIb	Myo18b	3.18	0.00152
17255458	phosphatase, orphan 1; zinc finger protein 652	Phospho1	3.18	0.001746
17536759	integrin beta 1 binding protein 2	Itgb1bp2	3.19	0.002654
17386396	solute carrier family 25 (mitochondrial carrier, Aralar), member 12	Slc25a12	3.19	0.000149
17325686	zinc finger and BTB domain containing 20	Zbtb20	3.19	0.001531
17441453	nitric oxide synthase 1, neuronal	Nos1	3.2	0.000416
17280062	lipin 1	Lpin1	3.21	0.004731
17278803	microRNA 379	Mir379	3.23	0.000559
17317278	kelch-like 38	Klhl38	3.24	0.001047
17477774	histidine rich calcium binding protein	Hrc	3.24	0.000489
17502462	transmembrane protein 38A	Tmem38a	3.26	0.000672
17224125	melanoregulin	Mreg	3.26	0.001074
17364932	glutamic-oxaloacetic transaminase 1, soluble	Got1	3.27	9.1e-05
17221502	junctophilin 1	Jph1	3.27	0.001083
17378348	transformation related protein 53 inducible nuclear protein 2	Trp53inp2	3.27	0.000494
17461414	basic helix-loop-helix family, member e40	Bhlhe40	3.28	0.000348
17251133	myosin, heavy polypeptide 8, skeletal muscle, perinatal	Myh8	3.28	0.00064
17342699	inositol hexaphosphate kinase 3	Ip6k3	3.28	0.002094
17352695	microRNA 1a-2	Mir1a-2	3.29	0.004337
17383633	carnitine acetyltransferase	Crat	3.29	0.000235
17358214	Kruppel-like factor 9	Klf9	3.29	0.001097
17278840	microRNA 376a	Mir376a	3.3	0.002095
17509775			3.31	0.001947
17334406	ribosomal protein L3-like	Rpl3l	3.35	0.009932
17485246	troponin T3, skeletal, fast	Tnnt3	3.38	0.000506
17517360	sarcolipin	Sln	3.39	0.001347
17298126	leucine-rich repeats and transmembrane domains 1	Lrtm1	3.4	0.000426
17252183	enolase 3, beta muscle	Eno3	3.41	0.000809
17229891	ATPase, Na+/K+ transporting, alpha 2 polypeptide	Atp1a2	3.41	0.000594
17501224			3.42	0.000222
17313705	parvin, beta	Parvb	3.42	0.000542
17532367	hedgehog acyltransferase-like	Hhatl	3.42	0.001611
17420874	peptidyl arginine deiminase, type II	Padi2	3.42	0.00435
17334091	host cell factor C1 regulator 1 (XPO1-dependent)	Hcfc1r1	3.43	3.7e-05
17443342	heat shock protein 1	Hspb1	3.45	0.000348
17325723	microRNA 568; zinc finger and BTB domain containing 20	Mir568	3.45	0.000224
17498115	proline rich 33	Prr33	3.46	0.002098
17451816	heat shock protein 8	Hspb8	3.46	0.000708
17290324	phosphofructokinase, platelet	Pfkp	3.47	0.020621
17336681	tenascin XB	Tnxb	3.47	0.002194
17448106	sel-1 suppressor of lin-12-like 3 (C. elegans)	Sel1l3	3.49	0.000688
17499485	myomesin 2	Myom2	3.49	0.002461
17539560	ankyrin repeat and SOCS box-containing 11	Asb11	3.49	0.000536
17232763	D-aspartate oxidase	Ddo	3.5	0.000534
17227311	shisa family member 4	Shisa4	3.5	0.000641
17238054	NADH dehydrogenase (ubiquinone) 1 alpha subcomplex, 4-like 2	Ndufa4l2	3.51	0.001363
17362342	lectin, galactose binding, soluble 12	Lgals12	3.51	0.000176
17501214			3.53	0.009403
17456428	leiomodin 2 (cardiac)	Lmod2	3.54	0.002493
17378799	predicted gene 20412 [Source:MGI Symbol;Acc:MGI:5141877]	Gm20412	3.55	0.001836
17550428			3.55	4e-06
17281084	egl-9 family hypoxia-inducible factor 3	Egln3	3.56	0.000534
17363559	family with sequence similarity 189, member A2	Fam189a2	3.56	0.000157
17424243	expressed sequence AI464131	AI464131	3.56	0.000325
17541525	olfactory receptor 1321	Olfr1321	3.56	0.007217
17489464	sodium channel, voltage-gated, type I, beta	Scn1b	3.56	0.000484
17324404	adiponectin, C1Q and collagen domain containing	Adipoq	3.56	0.004307
17372255	predicted gene 13938 [Source:MGI Symbol;Acc:MGI:3651046]	Gm13938	3.57	4.4e-05
17314577	phosphofructokinase, muscle	Pfkm	3.59	0.000131
17517390	isocitrate dehydrogenase 3 (NAD+) alpha	Idh3a	3.6	0.000749
17352036	proline-serine-threonine phosphatase-interacting protein 2	Pstpip2	3.6	0.000706
17462145	RIKEN cDNA 8430408G22 gene	8430408G22Rik	3.62	0.001759
17380757	predicted gene 6307	Gm6307	3.62	0.001098
17249990	immunity-related GTPase family M member 2	Irgm2	3.63	0.002728
17282025	spectrin beta, erythrocytic	Sptb	3.63	0.001107
17264792	ATPase, Na+/K+ transporting, beta 2 polypeptide	Atp1b2	3.63	0.000588
17278834	microRNA 376c	Mir376c	3.64	0.006434
17261865	cyclin G1	Ccng1	3.64	0.000256
17251001	myosin, heavy polypeptide 2, skeletal muscle, adult	Myh2	3.64	0.014955
17268884	nuclear receptor subfamily 1, group D, member 1	Nr1d1	3.65	0.000786
17456414	ankyrin repeat and SOCS box-containing 15	Asb15	3.65	0.000178
17378359	acyl-CoA synthetase short-chain family member 2; predicted gene, 39969	Acss2	3.65	0.0002
17231349	protein phosphatase 1, regulatory (inhibitor) subunit 14c	Ppp1r14c	3.68	0.004114
17233095	popeye domain containing 3	Popdc3	3.7	0.000946
17256697	amine oxidase, copper containing 3	Aoc3	3.72	0.002313
17439131	starch binding domain 1	Stbd1	3.72	0.001684
17351811	acetyl-Coenzyme A acyltransferase 2 (mitochondrial 3-oxoacyl-Coenzyme A thiolase)	Acaa2	3.73	0.000254
17278709	microRNA 434	Mir434	3.74	0.006529
17256870	CD300 antigen like family member G	Cd300lg	3.74	0.002369
17408211	phosphodiesterase 4D interacting protein (myomegalin); microRNA 7225	Pde4dip	3.75	0.000376
17549594			3.79	0.001534
17284049	ankyrin repeat domain 9	Ankrd9	3.79	0.000213
17489420	FXYD domain-containing ion transport regulator 1	Fxyd1	3.8	0.00023
17526707	zinc finger and BTB domain containing 16	Zbtb16	3.81	0.000887
17262942	solute carrier family 36 (proton/amino acid symporter), member 2	Slc36a2	3.81	0.00011
17548765			3.83	0.003086
17244732	myogenic factor 6	Myf6	3.84	0.003239
17414032	muscle-related coiled-coil protein	Murc	3.88	0.004451
17211004	alcohol dehydrogenase, iron containing, 1	Adhfe1	3.89	0.001384
17350267	myotilin	Myot	3.89	0.000854
17397331	predicted gene, 22043 [Source:MGI Symbol;Acc:MGI:5451820]	Gm22043	3.89	0.000895
17440826	acetyl-Coenzyme A carboxylase beta	Acacb	3.91	0.000297
17235597	ataxia, cerebellar, Cayman type homolog (human), opposite strand	Atcayos	3.92	0.000451
17278838	microRNA 376b	Mir376b	3.94	0.000816
17265096	solute carrier family 2 (facilitated glucose transporter), member 4	Slc2a4	3.96	0.000221
17246100	coenzyme Q10 homolog A (yeast)	Coq10a	3.97	0.000592
17393131	syntrophin, acidic 1	Snta1	3.98	0.00379
17501633	lipoprotein lipase	Lpl	3.99	0.001028
17337228	immediate early response 3	Ier3	4	0.000499
17214269	phospholipase C, delta 4	Plcd4	4	0.000963
17462954	splA/ryanodine receptor domain and SOCS box containing 2	Spsb2	4.02	0.000439
17251091	myosin, heavy polypeptide 4, skeletal muscle	Myh4	4.05	0.021512
17279349	adenylosuccinate synthetase like 1	Adssl1	4.12	0.002828
17501220			4.15	9.7e-05
17501222			4.15	9.7e-05
17451785	transmembrane protein 233	Tmem233	4.16	0.000226
17500996	acyl-CoA synthetase long-chain family member 1	Acsl1	4.16	0.00038
17293547	fructose bisphosphatase 2	Fbp2	4.19	0.003072
17548228	CDGSH iron sulfur domain 3B; CDGSH iron sulfur domain 3	Cisd3b	4.21	0.00021
17487242	RIKEN cDNA A930016O22 gene	A930016O22Rik	4.23	0.000106
17448449	predicted gene 15949 [Source:MGI Symbol;Acc:MGI:3801730]	Gm15949	4.28	0.002947
17402039	leucine rich repeat containing 39	Lrrc39	4.3	0.002019
17448001	peroxisome proliferative activated receptor, gamma, coactivator 1 alpha	Ppargc1a	4.3	0.000478
17427746	protein kinase, AMP-activated, alpha 2 catalytic subunit	Prkaa2	4.32	0.00033
17501226			4.33	0.00013
17327502	SH3-binding domain glutamic acid-rich protein	Sh3bgr	4.34	0.000589
17496857	cytochrome c oxidase subunit VIa polypeptide 2	Cox6a2	4.35	0.000214
17229121	methyltransferase like 11B	Mettl11b	4.36	0.002832
17233104	blood vessel epicardial substance	Bves	4.37	0.000284
17313862	peroxisome proliferator activated receptor alpha	Ppara	4.37	0.000729
17365803	nebulin-related anchoring protein	Nrap	4.4	0.002533
17337852	chloride intracellular channel 5	Clic5	4.41	0.003315
17350921	RIKEN cDNA F830016B08 gene	F830016B08Rik	4.43	0.008284
17294397	leucine rich repeat containing 14B	Lrrc14b	4.46	0.002122
17397297	RIKEN cDNA 3110057O12 gene	3110057O12Rik	4.47	0.001167
17496211	ATPase, Ca++ transporting, cardiac muscle, fast twitch 1	Atp2a1	4.52	0.000333
17260192	phosphoglycerate mutase 2	Pgam2	4.6	0.000905
17409261	synaptophysin-like 2	Sypl2	4.62	0.000548
17260261	calcium/calmodulin-dependent protein kinase II, beta	Camk2b	4.65	0.000639
17501211			4.72	0.002301
17268120	pyruvate dehydrogenase kinase, isoenzyme 2	Pdk2	4.84	0.000463
17352693	microRNA 133a-1	Mir133a-1	4.88	0.003191
17448535	Yip1 domain family, member 7	Yipf7	4.89	0.000806
17534337	ATPase, (Na+)/K+ transporting, beta 4 polypeptide	Atp1b4	4.92	0.002658
17506137	WAP four-disulfide core domain 1	Wfdc1	4.94	0.001143
17415815	phosphoglucomutase 2	Pgm2	4.97	7.4e-05
17314773	RIKEN cDNA 1700120C14 gene	1700120C14Rik	5.02	7.6e-05
17421074	heat shock protein family, member 7 (cardiovascular)	Hspb7	5.02	0.001736
17464943	protein phosphatase 1, regulatory (inhibitor) subunit 3A	Ppp1r3a	5.1	0.002279
17265326	predicted gene 12319 [Source:MGI Symbol;Acc:MGI:3649749]	Gm12319	5.18	0.000276
17503942	metallothionein 1	Mt1	5.21	0.000943
17242839			5.23	0.002854
17541528	immunoglobulin superfamily, member 1	Igsf1	5.23	0.000137
17361362	actinin alpha 3	Actn3	5.25	0.000852
17401126	adenosine monophosphate deaminase 1	Ampd1	5.27	0.001633
17276934	tetratricopeptide repeat domain 9	Ttc9	5.3	0.001124
17396152	carbonic anhydrase 3	Car3	5.33	0.004229
17356874	muscle glycogen phosphorylase	Pygm	5.37	0.00084
17230408	aarF domain containing kinase 3	Adck3	5.37	0.000242
17476456	heat shock protein, alpha-crystallin-related, B6	Hspb6	5.4	0.001253
17485215	troponin I, skeletal, fast 2	Tnni2	5.45	0.000497
17318942	parvalbumin	Pvalb	5.47	0.00541
17348902	dystrobrevin alpha	Dtna	5.5	0.000675
17393789	transglutaminase 2, C polypeptide	Tgm2	5.54	0.000219
17310816	carboxymethylenebutenolidase-like (Pseudomonas)	Cmbl	5.56	7.6e-05
17469754	cell death-inducing DFFA-like effector c	Cidec	5.72	0.003237
17497704	cytochrome c oxidase subunit VIIIb	Cox8b	5.74	0.00027
17492810	fibronectin type III and SPRY domain containing 2	Fsd2	5.83	0.001517
17289132	RIKEN cDNA A630019I02 gene	A630019I02Rik	5.88	2.7e-05
17463670			5.89	0.007479
17404091	fatty acid binding protein 4, adipocyte	Fabp4	5.93	0.001231
17346528	complement component 3	C3	5.96	0.003007
17453140	phosphorylase kinase gamma 1	Phkg1	5.98	0.00183
17439830	secreted phosphoprotein 1	Spp1	5.98	0.044234
17232453	triadin	Trdn	6.02	0.000832
17397320	La ribonucleoprotein domain family, member 1B	Larp1b	6.11	0.000669
17380762	microRNA 1a-1	Mir1a-1	6.19	0.003779
17484909	patatin-like phospholipase domain containing 2	Pnpla2	6.27	0.000725
17377816	myosin, light polypeptide kinase 2, skeletal muscle	Mylk2	6.31	0.000549
17464654	pyruvate dehydrogenase kinase, isoenzyme 4	Pdk4	6.35	1e-05
17387528	smoothelin-like 1	Smtnl1	6.41	9.9e-05
17271143	calcium channel, voltage-dependent, gamma subunit 1	Cacng1	6.57	0.000195
17400231	tropomodulin 4	Tmod4	6.62	0.000612
17439094	ADP-ribosyltransferase 3	Art3	6.67	0.000861
17229851	calsequestrin 1	Casq1	6.97	0.000652
17294959	cardiomyopathy associated 5	Cmya5	6.97	0.000371
17278836	microRNA 654	Mir654	6.98	0.00664
17493685	predicted gene 4980	Gm4980	7.17	0.000273
17503937	metallothionein 2	Mt2	7.27	0.001542
17474621	creatine kinase, muscle	Ckm	7.46	0.00349
17264330			7.7	4.6e-05
17498722	resistin	Retn	7.87	0.000839
17406421	family with sequence similarity 160, member A1; ADP-ribosylation factor interacting protein 1	Fam160a1	7.89	0.000945
17346125	perilipin 4	Plin4	7.97	0.001936
17310637	family with sequence similarity 134, member B	Fam134b	8.05	0.000603
17493432	thyroid hormone responsive	Thrsp	8.48	0.000227
17212286	solute carrier family 9 (sodium/hydrogen exchanger), member 2	Slc9a2	8.55	0.000112
17395766	eukaryotic translation elongation factor 1 alpha 2	Eef1a2	8.57	0.000431
17318083	lymphocyte antigen 6 complex, locus A	Ly6a	8.81	0.001346
17334666	tryptase beta 2	Tpsb2	8.94	0.028006
17501170	ankyrin repeat and SOCs box-containing 5	Asb5	8.96	0.000832
17501204			9	0.000422
17320499	choline kinase beta; carnitine palmitoyltransferase 1b, muscle; Chkb-Cpt1b readthrough transcript (NMD candidate)	Chkb	9.5	0.000825
17306147	N-myc downstream regulated gene 2	Ndrg2	9.6	3.8e-05
17474631			10.16	0.002641
17422907	PPARGC1 and ESRR induced regulator, muscle 1	Perm1	10.71	5e-06
17398139	myeloid leukemia factor 1	Mlf1	11.01	0.000307
17476288	cytochrome c oxidase subunit VIIa 1	Cox7a1	11.33	0.00066
17351457	cell death-inducing DNA fragmentation factor, alpha subunit-like effector A	Cidea	11.33	0.00145
17371296	xin actin-binding repeat containing 2	Xirp2	11.66	0.000191
17477322	kallikrein 1-related petidase b26	Klk1b26	12.21	0.000127
17404191			12.67	0.00054
17306960	mast cell protease 4	Mcpt4	12.97	0.002436
17303874	myozenin 1	Myoz1	14.15	0.000597
17502899	uncoupling protein 1 (mitochondrial, proton carrier)	Ucp1	14.24	5.9e-05
17234436	coiled-coil-helix-coiled-coil-helix domain containing 10	Chchd10	14.88	0.000274
17314888	glycerol-3-phosphate dehydrogenase 1 (soluble)	Gpd1	15.84	7.8e-05
17528947	muscular LMNA-interacting protein	Mlip	17.42	0.000489
17294816	creatine kinase, mitochondrial 2	Ckmt2	18.34	0.000263
17222707	methyltransferase like 21E	Mettl21e	24.27	0.000159
17543315	ankyrin repeat and SOCS box-containing 12	Asb12	25.83	8e-05
17490245	myosin binding protein C, fast-type	Mybpc2	29.43	0.000995

## Sheet: Cav1.1-- E18.5 vs E14.5
DEGs detected in Cav1.1-/- E18.5 vs. E14.5
Transcript Cluster ID	Description	Gene Symbol	Fold Change (linear) (homoCAC18.5 vs. homoCAC14.5)	ANOVA p-value (homoCAC18.5 vs. homoCAC14.5)
17286641	desmoplakin	Dsp	-15.56	0.028174
17231844	PERP, TP53 apoptosis effector	Perp	-14.5	0.038847
17494246	hemoglobin Y, beta-like embryonic chain	Hbb-y	-13.84	0.001801
17321966	keratin 5	Krt5	-7.62	0.021582
17467359	tumor-associated calcium signal transducer 2	Tacstd2	-7.12	0.047532
17211347	transcription factor AP-2 beta	Tfap2b	-5.56	0.033175
17546055	EGF-like-domain, multiple 6	Egfl6	-5.04	5.8e-05
17352913	desmocollin 3	Dsc3	-4.98	0.016715
17360863	RIKEN cDNA E330013P04 gene	E330013P04Rik	-4.73	0.001306
17247852	B cell CLL/lymphoma 11A (zinc finger protein)	Bcl11a	-4.6	4.7e-05
17389467	gremlin 1	Grem1	-4.29	5.6e-05
17395041	bone morphogenetic protein 7	Bmp7	-4.29	0.000174
17484710	beta-1,4-N-acetyl-galactosaminyl transferase 4	B4galnt4	-4.28	0.00119
17397740	mab-21-like 1 (C. elegans)	Mab21l1	-4.25	0.001898
17283871	B cell leukemia/lymphoma 11B	Bcl11b	-4.14	0.000228
17505124	cadherin 3	Cdh3	-4.05	0.000119
17365960	glial cell line derived neurotrophic factor family receptor alpha 1	Gfra1	-4.04	7.4e-05
17224977	delta/notch-like EGF repeat containing	Dner	-4.04	0.002101
17341595	kringle containing transmembrane protein 2	Kremen2	-4.04	3.8e-05
17516438	tripartite motif-containing 29	Trim29	-3.96	0.049391
17423395	solute carrier family 26, member 7	Slc26a7	-3.81	0.000512
17288442	Iroquois related homeobox 2 (Drosophila)	Irx2	-3.76	0.014288
17430645	Na+/K+ transporting ATPase interacting 1	Nkain1	-3.75	7.5e-05
17529307	elongation of very long chain fatty acids (FEN1/Elo2, SUR4/Elo3, yeast)-like 4	Elovl4	-3.74	0.002541
17505790	contactin associated protein-like 4	Cntnap4	-3.62	0.002683
17518780	carbonic anyhydrase 12	Car12	-3.55	0.00046
17269391	keratin 14	Krt14	-3.44	0.012501
17532615	mitochondrially encoded tRNA lysine [Source:MGI Symbol;Acc:MGI:102483]	mt-Tk	-3.42	0.013461
17228667	pappalysin 2	Pappa2	-3.4	4e-05
17470561	ribosomal modification protein rimK-like family member B	Rimklb	-3.39	0.003106
17458677	cAMP responsive element binding protein 5	Creb5	-3.39	0.001723
17293006	chemokine (C-X-C motif) ligand 14	Cxcl14	-3.38	0.001658
17529930	calsyntenin 2	Clstn2	-3.37	0.000244
17274021	odd-skipped related 1 (Drosophila)	Osr1	-3.37	8.7e-05
17351137	interleukin 17B	Il17b	-3.34	0.019435
17398895	cellular retinoic acid binding protein II	Crabp2	-3.33	0.000717
17534673	serine/threonine kinase 26	Stk26	-3.28	0.016765
17364917	heparanase 2	Hpse2	-3.27	0.000353
17547813			-3.23	0.000928
17397377	protocadherin 10	Pcdh10	-3.22	0.000461
17290447	cholinergic receptor, muscarinic 3, cardiac	Chrm3	-3.16	0.000976
17232215	monooxygenase, DBH-like 1	Moxd1	-3.11	0.002204
17234030	transmembrane protein 26	Tmem26	-3.09	0.000565
17245422	high mobility group AT-hook 2	Hmga2	-3.08	0.016826
17502789	glycophorin A	Gypa	-3.03	0.000237
17544691	brain expressed X-linked 2	Bex2	-3	0.02534
17277788	fibronectin leucine rich transmembrane protein 2	Flrt2	-2.98	0.001638
17221269	carboxypeptidase A6	Cpa6	-2.98	0.001065
17412296	Eph receptor A7	Epha7	-2.97	0.006406
17517848	stimulated by retinoic acid gene 6	Stra6	-2.97	0.010944
17237701	Wnt inhibitory factor 1	Wif1	-2.94	0.004442
17406165	glycine receptor, beta subunit	Glrb	-2.94	0.000626
17316569	uncharacterized LOC105245924; predicted gene 16136 [Source:MGI Symbol;Acc:MGI:3802137]	LOC105245924	-2.93	0.049864
17428659	nuclear autoantigenic sperm protein (histone-binding)	Nasp	-2.92	0.002901
17448595	gamma-aminobutyric acid (GABA) A receptor, subunit alpha 4	Gabra4	-2.9	0.008007
17403969	RIKEN cDNA 2700069I18 gene	2700069I18Rik	-2.89	0.004158
17545150	lipoma HMGIC fusion partner-like 1	Lhfpl1	-2.87	1.4e-05
17361454	cornichon homolog 2 (Drosophila)	Cnih2	-2.87	0.000948
17261608	gamma-aminobutyric acid (GABA) A receptor, pi	Gabrp	-2.87	0.0056
17398416	platelet-derived growth factor, C polypeptide	Pdgfc	-2.86	0.000588
17389608	Meis homeobox 2	Meis2	-2.86	0.002155
17215799	twist basic helix-loop-helix transcription factor 2	Twist2	-2.83	0.001614
17291053	histone cluster 1, H4i	Hist1h4i	-2.82	0.004172
17464977	wingless-type MMTV integration site family, member 2	Wnt2	-2.82	0.002997
17398115	pentraxin related gene	Ptx3	-2.78	0.001746
17358368	doublesex and mab-3 related transcription factor 2	Dmrt2	-2.77	0.003973
17316402	NIPA-like domain containing 2	Nipal2	-2.76	1.7e-05
17524944	zinc finger protein 599	Zfp599	-2.73	0.005492
17442765	transmembrane protein 132C	Tmem132c	-2.72	0.000334
17480675	procollagen-proline, 2-oxoglutarate 4-dioxygenase (proline 4-hydroxylase), alpha polypeptide III	P4ha3	-2.71	0.005052
17544164	ribosomal protein S6 kinase polypeptide 6	Rps6ka6	-2.71	0.005536
17464706	distal-less homeobox 5	Dlx5	-2.71	0.034248
17458669	RIKEN cDNA 9430076C15 gene; cAMP responsive element binding protein 5	9430076C15Rik	-2.71	0.001369
17355565	solute carrier family 14 (urea transporter), member 1	Slc14a1	-2.7	0.000524
17407001	ephrin A3	Efna3	-2.7	0.001362
17340397	predicted gene 6741 [Source:MGI Symbol;Acc:MGI:3643504]	Gm6741	-2.67	0.038205
17436999	collapsin response mediator protein 1	Crmp1	-2.66	0.000161
17319887	signal peptide, CUB domain, EGF-like 1	Scube1	-2.65	0.001813
17301582	neurofilament, light polypeptide	Nefl	-2.65	0.006314
17416955	BEN domain containing 5	Bend5	-2.64	0.000157
17248255	hemoglobin X, alpha-like embryonic chain in Hba complex	Hba-x	-2.63	0.017619
17425525	ferric-chelate reductase 1 like	Frrs1l	-2.61	0.00027
17388284	midkine	Mdk	-2.61	0.000275
17335383	mitogen-activated protein kinase 13	Mapk13	-2.61	0.046684
17434764	sema domain, immunoglobulin domain (Ig), short basic domain, secreted, (semaphorin) 3A	Sema3a	-2.6	0.002916
17451930	expressed sequence AW549542	AW549542	-2.6	0.003342
17309360	SLIT and NTRK-like family, member 1	Slitrk1	-2.59	0.000252
17541618	muscleblind-like 3 (Drosophila)	Mbnl3	-2.58	0.001764
17360845	empty spiracles homeobox 2	Emx2	-2.57	0.010831
17294215	Iroquois related homeobox 1 (Drosophila)	Irx1	-2.56	0.005821
17352517	mohawk homeobox	Mkx	-2.55	0.0085
17309385	dopachrome tautomerase	Dct	-2.54	0.009853
17310982	odd-skipped related 2	Osr2	-2.54	0.004771
17478476	growth arrest specific 2	Gas2	-2.53	0.003399
17371941	cell division cycle associated 7	Cdca7	-2.52	0.002692
17402662	lymphoid enhancer binding factor 1	Lef1	-2.51	0.003443
17548979	predicted gene 4322 [Source:MGI Symbol;Acc:MGI:3782503]	Gm4322	-2.5	0.003113
17519967	trophoblast glycoprotein	Tpbg	-2.5	0.000974
17532755	diacylglycerol kinase kappa	Dgkk	-2.5	0.002618
17334126	serine/arginine repetitive matrix 2; RIKEN cDNA D930048G16 gene	Srrm2	-2.5	0.003439
17288454	Iroquois related homeobox 4 (Drosophila)	Irx4	-2.49	0.016034
17414651	zinc finger protein 618	Zfp618	-2.48	0.001356
17219848	exonuclease 1	Exo1	-2.47	4.9e-05
17469463	RING1 and YY1 binding protein	Rybp	-2.45	0.004552
17378741	neuronatin	Nnat	-2.45	0.003518
17411262	ST6 (alpha-N-acetyl-neuraminyl-2,3-beta-galactosyl-1,3)-N-acetylgalactosaminide alpha-2,6-sialyltransferase 3	St6galnac3	-2.44	0.002106
17545135	transient receptor potential cation channel, subfamily C, member 5	Trpc5	-2.44	0.003257
17268255	insulin-like growth factor 2 mRNA binding protein 1; microRNA 3063	Igf2bp1	-2.43	0.000697
17249461	follistatin-like 4	Fstl4	-2.43	3.9e-05
17528963	leucine rich repeat containing 1	Lrrc1	-2.43	0.000739
17543870	zinc finger, DHHC domain containing 15	Zdhhc15	-2.43	0.000741
17406456	mab-21-like 2 (C. elegans)	Mab21l2	-2.42	0.011087
17530311	transmembrane protein 108	Tmem108	-2.42	0.000947
17453776	collagen, type XXVI, alpha 1	Col26a1	-2.42	0.000188
17236816	keratocan	Kera	-2.41	0.00986
17355332	deleted in colorectal carcinoma	Dcc	-2.4	0.008352
17544385	tetraspanin 6	Tspan6	-2.4	0.002189
17274959	twist basic helix-loop-helix transcription factor 1	Twist1	-2.4	0.003895
17352850	potassium channel tetramerisation domain containing 1	Kctd1	-2.4	0.003562
17328610	RIKEN cDNA 2610318N02 gene	2610318N02Rik	-2.39	0.000362
17292967	paired-like homeodomain transcription factor 1	Pitx1	-2.39	0.014917
17543840	expressed sequence C77370	C77370	-2.39	0.011736
17231272	microRNA 205; RIKEN cDNA 4631405K08 gene	Mir205	-2.38	0.018822
17326964	hormonally upregulated Neu-associated kinase	Hunk	-2.38	0.000583
17217335	renin 1 structural; renin 2 tandem duplication of Ren1	Ren1	-2.38	0.00769
17331401	predicted gene, 22769 [Source:MGI Symbol;Acc:MGI:5452546]	Gm22769	-2.38	0.011974
17478406	NEL-like 1	Nell1	-2.38	0.001134
17549906			-2.37	0.021249
17501041	caspase 3	Casp3	-2.37	0.005264
17524233	FAT tumor suppressor homolog 3 (Drosophila)	Fat3	-2.36	0.009187
17301247	PIN2/TERF1 interacting, telomerase inhibitor 1	Pinx1	-2.36	0.00142
17477734	TEA domain family member 2	Tead2	-2.36	5.6e-05
17354906	piezo-type mechanosensitive ion channel component 2	Piezo2	-2.35	0.001745
17288992	EGF-like repeats and discoidin I-like domains 3; predicted gene, 38504	Edil3	-2.35	0.03834
17416685	predicted gene, 23138 [Source:MGI Symbol;Acc:MGI:5452915]	Gm23138	-2.34	0.024681
17224661	Eph receptor A4	Epha4	-2.34	0.003663
17537271	zinc finger protein 711	Zfp711	-2.33	0.005781
17264769	ephrin B3	Efnb3	-2.33	0.001617
17466878	homeobox A10	Hoxa10	-2.32	0.008813
17407010	ephrin A4	Efna4	-2.32	0.000178
17462492	alpha-2-macroglobulin	A2m	-2.31	0.012743
17496947	fibroblast growth factor receptor 2	Fgfr2	-2.31	0.026579
17456308	potassium voltage-gated channel, Shal-related family, member 2	Kcnd2	-2.3	0.003762
17310339	C1q and tumor necrosis factor related protein 3	C1qtnf3	-2.3	0.012289
17507288	Shc SH2-domain binding protein 1	Shcbp1	-2.3	0.002851
17364111	cholesterol 25-hydroxylase	Ch25h	-2.3	0.00176
17502583	minichromosome maintenance deficient 5, cell division cycle 46 (S. cerevisiae)	Mcm5	-2.3	0.001359
17262172	predicted gene, 23039 [Source:MGI Symbol;Acc:MGI:5452816]	Gm23039	-2.29	0.033325
17464672	solute carrier family 25 (mitochondrial carrier, adenine nucleotide translocator), member 13	Slc25a13	-2.29	0.006009
17409963	formin binding protein 1-like	Fnbp1l	-2.28	0.00352
17441610	T-box 5	Tbx5	-2.27	0.001735
17338670	fibronectin type 3 and SPRY domain-containing protein	Fsd1	-2.27	0.000963
17466932	TLR4 interactor with leucine-rich repeats	Tril	-2.27	0.002701
17419369	transmembrane protein 200B	Tmem200b	-2.27	0.001019
17526456	CD3 antigen, gamma polypeptide	Cd3g	-2.26	0.001212
17426434	bone morphogenic protein/retinoic acid inducible neural specific 1	Brinp1	-2.25	0.001592
17294302	thyroid hormone receptor interactor 13	Trip13	-2.25	0.001088
17352933	desmocollin 2	Dsc2	-2.25	0.00743
17550392			-2.25	0.000733
17413500	GLI pathogenesis-related 2	Glipr2	-2.24	0.000352
17227753	TROVE domain family, member 2	Trove2	-2.24	0.007805
17331481	roundabout homolog 2 (Drosophila)	Robo2	-2.24	0.000684
17451186	myocardial infarction associated transcript (non-protein coding)	Miat	-2.23	0.000337
17238210	DNA primase, p49 subunit	Prim1	-2.23	0.000358
17456131	testis derived transcript	Tes	-2.23	0.004779
17232082	retinoic acid early transcript delta; retinoic acid early transcript 1E; retinoic acid early transcript beta	Raet1d	-2.22	0.013298
17330443	growth associated protein 43	Gap43	-2.22	0.000669
17506697	ras homolog gene family, member U	Rhou	-2.22	0.002014
17455903	ankyrin repeat and SOCS box-containing 4	Asb4	-2.21	0.013901
17338747	ubiquitin-like, containing PHD and RING finger domains, 1	Uhrf1	-2.21	0.000228
17402698	dickkopf homolog 2 (Xenopus laevis)	Dkk2	-2.2	0.002973
17256225	cell division cycle 6	Cdc6	-2.2	0.002732
17381225	suppressor of variegation 3-9 homolog 2 (Drosophila)	Suv39h2	-2.2	0.007393
17244661	transmembrane and tetratricopeptide repeat containing 2	Tmtc2	-2.2	2.7e-05
17506917	potassium channel, subfamily K, member 1	Kcnk1	-2.19	0.006536
17351196	adenomatosis polyposis coli down-regulated 1	Apcdd1	-2.19	0.008569
17437350	predicted gene 20475 [Source:MGI Symbol;Acc:MGI:5141940]	Gm20475	-2.19	0.009824
17461448	glutamate receptor, metabotropic 7	Grm7	-2.18	0.000697
17445507	DBF4 homolog (S. cerevisiae)	Dbf4	-2.18	0.00165
17331380	Eph receptor A3	Epha3	-2.18	0.015935
17534706	PHD finger protein 6	Phf6	-2.18	0.003593
17445308	cytochrome P450, family 51	Cyp51	-2.18	0.045259
17391376	budding uninhibited by benzimidazoles 1 homolog (S. cerevisiae)	Bub1	-2.18	0.004544
17338660	src homology 2 domain-containing transforming protein D	Shd	-2.17	0.002568
17215605	atypical chemokine receptor 3	Ackr3	-2.17	0.002838
17307203	spindle and kinetochore associated complex subunit 3	Ska3	-2.17	0.00226
17388353	glycosyltransferase-like 1B	Gyltl1b	-2.17	0.00017
17470597	solute carrier family 2 (facilitated glucose transporter), member 3	Slc2a3	-2.17	0.008472
17479834	mex3 homolog B (C. elegans)	Mex3b	-2.16	0.00228
17274394			-2.16	0.037012
17315495	homeobox C11	Hoxc11	-2.16	0.002151
17362256	fibronectin leucine rich transmembrane protein 1	Flrt1	-2.16	0.011997
17350552	proline rich 16	Prr16	-2.15	0.000981
17221633	minichromosome maintenance deficient 3 (S. cerevisiae)	Mcm3	-2.15	0.001095
17295745	centromere protein H	Cenph	-2.15	0.000381
17373530	synaptotagmin XIII	Syt13	-2.15	5e-06
17405047	RIKEN cDNA 2610316D01 gene	2610316D01Rik	-2.15	0.002089
17538405			-2.15	0.014825
17430037	tektin 2	Tekt2	-2.14	0.017781
17454310	glypican 2 (cerebroglycan)	Gpc2	-2.14	0.002019
17547744	CDC28 protein kinase regulatory subunit 2	Cks2	-2.14	0.000922
17548303	predicted gene 12891 [Source:MGI Symbol;Acc:MGI:3649646]	Gm12891	-2.14	0.000922
17548955	CDC28 protein kinase regulatory subunit 2	Cks2	-2.14	0.000922
17434742	sema domain, immunoglobulin domain (Ig), short basic domain, secreted, (semaphorin) 3D	Sema3d	-2.13	0.00114
17347493	serine/arginine-rich splicing factor 7	Srsf7	-2.13	0.001437
17515950	cell adhesion molecule-related/down-regulated by oncogenes	Cdon	-2.13	0.007504
17339460			-2.13	0.041802
17246860	4-nitrophenylphosphatase domain and non-neuronal SNAP25-like protein homolog 1 (C. elegans)	Nipsnap1	-2.13	0.00157
17305757	WD repeat and HMG-box DNA binding protein 1	Wdhd1	-2.13	0.000261
17512121	cadherin 8	Cdh8	-2.13	0.0004
17489886	cyclin E1	Ccne1	-2.12	0.000989
17359212	helicase, lymphoid specific	Hells	-2.12	0.003279
17239539	heme binding protein 2	Hebp2	-2.12	0.000315
17469636	RAD18 E3 ubiquitin protein ligase	Rad18	-2.12	0.001879
17548593			-2.11	0.025952
17466641	insulin-like growth factor 2 mRNA binding protein 3	Igf2bp3	-2.11	0.000765
17309457	DAZ interacting protein 1	Dzip1	-2.11	0.003431
17525405	DEAD (Asp-Glu-Ala-Asp) box polypeptide 25	Ddx25	-2.11	0.037382
17229128	cDNA sequence BC055324	BC055324	-2.11	0.001405
17281908	transmembrane protein 30B	Tmem30b	-2.11	0.001435
17294149	ubiquitin-conjugating enzyme E2Q family-like 1	Ube2ql1	-2.11	0.003609
17466397	Eph receptor A1	Epha1	-2.11	0.00363
17405075	protocadherin 18	Pcdh18	-2.1	0.001388
17252272	MIS12 homolog (yeast)	Mis12	-2.1	0.000605
17317115	defective in sister chromatid cohesion 1 homolog (S. cerevisiae)	Dscc1	-2.1	0.006318
17481723	small nucleolar RNA, H/ACA box 23	Snora23	-2.1	0.000618
17523095	endo/exonuclease (5-3), endonuclease G-like	Exog	-2.1	0.003575
17543885	melanoma antigen, family E, 2	Magee2	-2.1	0.023211
17507321	ephrin B2	Efnb2	-2.09	0.001183
17518318	predicted gene, 22455 [Source:MGI Symbol;Acc:MGI:5452232]	Gm22455	-2.09	0.011851
17525503	checkpoint kinase 1	Chek1	-2.09	0.000543
17437876	ubiquitin carboxy-terminal hydrolase L1	Uchl1	-2.09	6.7e-05
17476349	spectrin repeat containing, nuclear envelope family member 4	Syne4	-2.09	0.001316
17405724	short stature homeobox 2	Shox2	-2.08	0.022719
17537878	brain expressed gene 4	Bex4	-2.08	0.025658
17392255	fibronectin leucine rich transmembrane protein 3	Flrt3	-2.08	0.010042
17366728	microRNA 669d	Mir669d	-2.07	0.019597
17315878	S-phase kinase-associated protein 2 (p45)	Skp2	-2.07	0.001317
17363903	protein kinase, cGMP-dependent, type I	Prkg1	-2.07	0.000614
17342999	copine V	Cpne5	-2.07	0.009271
17345728	MyoD family inhibitor	Mdfi	-2.07	0.011082
17296080	predicted gene, 24431 [Source:MGI Symbol;Acc:MGI:5454208]	Gm24431	-2.06	0.0335
17293237	golgi membrane protein 1	Golm1	-2.06	0.002277
17353520	cell division cycle 25C	Cdc25c	-2.06	0.002451
17399086	mex3 homolog A (C. elegans)	Mex3a	-2.06	0.000366
17376549	prion protein dublet; prion protein gene complex	Prnd	-2.05	0.008215
17328432	minichromosome maintenance deficient 4 homolog (S. cerevisiae)	Mcm4	-2.05	0.002872
17380637	cadherin 4	Cdh4	-2.05	0.001838
17455913	dynein cytoplasmic 1 intermediate chain 1	Dync1i1	-2.05	0.019055
17388725	four jointed box 1 (Drosophila)	Fjx1	-2.04	0.005058
17437302	slit homolog 2 (Drosophila)	Slit2	-2.04	0.009371
17211198	sulfatase 1	Sulf1	-2.04	0.001966
17426890	PC4 and SFRS1 interacting protein 1	Psip1	-2.04	0.014254
17331987	MIS18 kinetochore protein homolog A (S. pombe)	Mis18a	-2.04	0.000431
17233347	gap junction protein, alpha 1	Gja1	-2.04	0.000372
17265470	RIKEN cDNA 6330403K07 gene	6330403K07Rik	-2.04	0.004679
17419097	adhesion G protein-coupled receptor B2	Adgrb2	-2.04	0.005071
17446981	fibronectin type III domain containing 4	Fndc4	-2.04	0.000118
17340272	epithelial cell adhesion molecule	Epcam	-2.03	0.01273
17348016	neurexin I	Nrxn1	-2.03	0.000515
17446058	predicted gene, 24009 [Source:MGI Symbol;Acc:MGI:5453786]	Gm24009	-2.03	0.001636
17545199	leucine-rich repeats and calponin homology (CH) domain containing 2	Lrch2	-2.02	0.014215
17350591	synuclein, alpha interacting protein (synphilin)	Sncaip	-2.02	0.000209
17327331	chromatin assembly factor 1, subunit B (p60)	Chaf1b	-2.02	0.000495
17218321	regulator of G-protein signaling 16	Rgs16	-2.02	0.011138
17237564	transformed mouse 3T3 cell double minute 1	Mdm1	-2.02	0.002262
17273948	syndecan 1	Sdc1	-2.02	0.000113
17274346	RIKEN cDNA 5730507C01 gene	5730507C01Rik	-2.02	0.031117
17330058	protein disulfide isomerase associated 5	Pdia5	-2.02	0.009481
17412593	serine/arginine-rich splicing factor 12	Srsf12	-2.02	0.000653
17527848	thrombospondin, type I, domain containing 4	Thsd4	-2.02	0.005529
17394538	sulfatase 2	Sulf2	-2.01	0.001946
17213295	NOP58 ribonucleoprotein	Nop58	-2.01	0.009276
17280292	predicted gene 9312 [Source:MGI Symbol;Acc:MGI:3647775]	Gm9312	-2.01	0.00359
17429632	major facilitator superfamily domain containing 2A	Mfsd2a	-2.01	0.00243
17539586	Fanconi anemia, complementation group B	Fancb	-2.01	0.017889
17288231	RING1 and YY1 binding protein, pseudogene	Rybp-ps	-2	0.033101
17261710	spindle apparatus coiled-coil protein 1	Spdl1	-2	0.039822
17245272	nucleoporin 107	Nup107	-2	0.005164
17291057	histone cluster 1, H2ag	Hist1h2ag	-2	0.001315
17381999	SKI/DACH domain containing 1	Skida1	-2	0.002483
17534528	X-prolyl aminopeptidase (aminopeptidase P) 2, membrane-bound	Xpnpep2	-2	0.003382
17278702	microRNA 431	Mir431	2	0.013783
17386396	solute carrier family 25 (mitochondrial carrier, Aralar), member 12	Slc25a12	2	0.000544
17533269	tetraspanin 7	Tspan7	2	0.001033
17260023	ubiquinol-cytochrome c reductase, complex III subunit X	Uqcr10	2	0.000371
17278753	predicted gene, 23912 [Source:MGI Symbol;Acc:MGI:5453689]	Gm23912	2	0.001879
17421867	G protein-coupled receptor 157	Gpr157	2	0.007267
17464282	sarcospan	Sspn	2	0.002497
17483568	tripartite motif-containing 72	Trim72	2	0.029197
17487489	poliovirus receptor	Pvr	2	0.000359
17489399	FXYD domain-containing ion transport regulator 5	Fxyd5	2	0.025643
17278700	microRNA 3070b	Mir3070b	2.01	0.001179
17255026	tripartite motif-containing 25	Trim25	2.01	0.005736
17255210	transducer of ErbB-2.1	Tob1	2.01	0.000868
17262259	butyrophilin-like 9	Btnl9	2.01	0.005856
17318741	myoglobin	Mb	2.01	0.002963
17383886	RIKEN cDNA 1110008P14 gene	1110008P14Rik	2.01	0.002003
17432256	solute carrier family 25, member 34	Slc25a34	2.01	0.017097
17319801	alpha 1,4-galactosyltransferase	A4galt	2.02	0.01662
17450741	ATP synthase, H+ transporting, mitochondrial F1F0 complex, subunit E	Atp5k	2.02	0.00308
17488608	ryanodine receptor 1, skeletal muscle	Ryr1	2.02	0.016068
17227160	protein phosphatase 1, regulatory (inhibitor) subunit 12B	Ppp1r12b	2.02	0.003301
17303625	nuclear receptor subfamily 1, group D, member 2	Nr1d2	2.02	0.000458
17322700	RNA binding protein, fox-1 homolog (C. elegans) 1	Rbfox1	2.02	0.003414
17424090	predicted gene, 24112 [Source:MGI Symbol;Acc:MGI:5453889]	Gm24112	2.02	0.010421
17253037	inositol polyphosphate 5-phosphatase K	Inpp5k	2.03	4.4e-05
17252767	clustered mitochondria (cluA/CLU1) homolog	Cluh	2.03	0.005237
17312716	colony stimulating factor 2 receptor, beta, low-affinity (granulocyte-macrophage)	Csf2rb	2.03	0.03475
17315305	insulin-like growth factor binding protein 6	Igfbp6	2.03	0.03826
17468747	kelch repeat and BTB (POZ) domain containing 12	Kbtbd12	2.03	0.00775
17469360	leiomodin 3 (fetal)	Lmod3	2.03	0.012435
17507799	angiopoietin 2	Angpt2	2.03	1.9e-05
17278696	microRNA 665	Mir665	2.04	0.003483
17519778			2.04	0.000979
17524451	collagen, type V, alpha 3	Col5a3	2.04	0.014629
17290965	cytochrome c oxidase subunit 5B, mitochondrial	LOC102641600	2.04	0.001807
17247080	oxoglutarate (alpha-ketoglutarate) dehydrogenase (lipoamide)	Ogdh	2.04	0.001634
17252609	purinergic receptor P2X, ligand-gated ion channel, 5	P2rx5	2.04	0.000621
17375006	glucosidase, alpha; neutral C; calpain 3	Ganc	2.04	0.001323
17397297	RIKEN cDNA 3110057O12 gene	3110057O12Rik	2.04	0.003733
17278694	microRNA 540	Mir540	2.05	0.011808
17283549	interferon, alpha-inducible protein 27 like 2A	Ifi27l2a	2.05	0.022026
17404329	glycogenin	Gyg	2.05	0.00033
17235320	receptor accessory protein 6	Reep6	2.05	0.033745
17461414	basic helix-loop-helix family, member e40	Bhlhe40	2.05	0.006685
17300381	CKLF-like MARVEL transmembrane domain containing 5	Cmtm5	2.05	0.027766
17303882	synaptopodin 2-like	Synpo2l	2.05	0.008259
17358271	predicted gene 10053 [Source:MGI Symbol;Acc:MGI:3704493]	Gm10053	2.05	0.000257
17412191	coenzyme Q3 homolog, methyltransferase (yeast)	Coq3	2.05	0.000258
17462663	microfibrillar associated protein 5	Mfap5	2.05	0.028941
17542642	deoxyribonuclease 1-like 1	Dnase1l1	2.05	0.002865
17451649	acyl-Coenzyme A dehydrogenase, short chain	Acads	2.06	0.007849
17462437	ubiquitin specific peptidase 18	Usp18	2.06	0.026432
17428477	cytochrome P450, family 4, subfamily b, polypeptide 1	Cyp4b1	2.06	0.002767
17225811	predicted gene, 23181 [Source:MGI Symbol;Acc:MGI:5452958]	Gm23181	2.06	0.000524
17227311	shisa family member 4	Shisa4	2.06	0.00434
17302429	LIM domain only 7	Lmo7	2.06	0.011
17446322	protein kinase, AMP-activated, gamma 2 non-catalytic subunit	Prkag2	2.06	0.00985
17480048	malic enzyme 3, NADP(+)-dependent, mitochondrial	Me3	2.06	0.000117
17423781	peptidase M20 domain containing 2	Pm20d2	2.07	0.000214
17506273	cytochrome c oxidase subunit IV isoform 1	Cox4i1	2.07	0.005356
17318502	diacylglycerol O-acyltransferase 1	Dgat1	2.07	0.012538
17228164	laminin, gamma 1	Lamc1	2.07	0.000839
17231789	taxilin beta	Txlnb	2.07	0.019807
17249829			2.07	0.016399
17278795	predicted gene, 23787 [Source:MGI Symbol;Acc:MGI:5453564]	Gm23787	2.07	0.00618
17330264	F-box protein 40	Fbxo40	2.07	0.00314
17525803	GRAM domain containing 1B	Gramd1b	2.07	0.001406
17549594			2.07	0.016233
17230055	interferon-activable protein 203-like	Gm16340	2.08	0.00179
17525090	galactosidase, beta 1-like 2	Glb1l2	2.08	0.002887
17297801	predicted gene 2260; predicted gene 2274	Gm2260	2.08	0.000505
17297833	predicted gene 2260; predicted gene 2274	Gm2260	2.08	0.000505
17401041	calsequestrin 2	Casq2	2.08	0.01536
17230484	epoxide hydrolase 1, microsomal	Ephx1	2.09	0.000716
17349209	LIM and senescent cell antigen like domains 2	Lims2	2.09	0.004276
17286682	bone morphogenetic protein 6	Bmp6	2.09	0.00062
17334091	host cell factor C1 regulator 1 (XPO1-dependent)	Hcfc1r1	2.09	0.001557
17514328	predicted gene 11168 [Source:MGI Symbol;Acc:MGI:3779420]	Gm11168	2.09	0.023071
17538590	6-phosphofructo-2-kinase/fructose-2,6-biphosphatase 1	Pfkfb1	2.09	0.003978
17512765	brown adipose tissue enriched long non-coding RNA 1	Lncbate1	2.1	0.010836
17237451	protein tyrosine phosphatase, receptor type, B	Ptprb	2.1	0.001229
17441351	serine/arginine repetitive matrix 4, opposite strand	Srrm4os	2.1	0.005509
17470301	adiponectin receptor 2	Adipor2	2.1	0.00225
17522536	leucine rich repeat containing 2	Lrrc2	2.1	0.001757
17300544	fat storage-inducing transmembrane protein 1	Fitm1	2.11	0.027434
17423665	four and a half LIM domains 5	Fhl5	2.11	0.000914
17357004	MACRO domain containing 1	Macrod1	2.11	0.003877
17337796	phospholipase A2, group VII (platelet-activating factor acetylhydrolase, plasma)	Pla2g7	2.11	0.003987
17445238	klotho	Kl	2.11	0.02218
17462954	splA/ryanodine receptor domain and SOCS box containing 2	Spsb2	2.11	0.018731
17468551	annexin A4	Anxa4	2.11	0.000444
17526576	transgelin	Tagln	2.11	0.005296
17548981			2.11	0.001096
17211367	microRNA 133b	Mir133b	2.12	0.014249
17364150	pantothenate kinase 1	Pank1	2.12	0.021326
17259623	fructosamine 3 kinase	Fn3k	2.12	0.001372
17548117	predicted pseudogene 6293 [Source:MGI Symbol;Acc:MGI:3649011]	Gm6293	2.12	0.004267
17456152	caveolin 2	Cav2	2.12	0.001039
17393008	dual specificity phosphatase-like 15	Dusp15	2.12	0.007686
17497718	interferon induced transmembrane protein 3	Ifitm3	2.12	0.029928
17237522	bestrophin 3	Best3	2.12	0.011225
17270874	sodium channel, voltage-gated, type IV, alpha	Scn4a	2.12	0.001658
17386778	titin	Ttn	2.12	0.0064
17251441	solute carrier family 25, member 35	Slc25a35	2.13	0.023697
17325686	zinc finger and BTB domain containing 20	Zbtb20	2.13	0.000228
17456161	caveolin 1, caveolae protein	Cav1	2.13	0.002115
17509976	solute carrier family 25, member 42	Slc25a42	2.13	0.0119
17224540	tubulin, alpha 4A	Tuba4a	2.13	0.024168
17240303	RIKEN cDNA G630090E17 gene	G630090E17Rik	2.13	0.000599
17301718	early growth response 3	Egr3	2.13	0.008026
17346136	perilipin 5	Plin5	2.13	0.02683
17359113	free fatty acid receptor 4	Ffar4	2.13	0.034353
17361141	carnosine synthase 1	Carns1	2.13	0.001444
17514078	angiotensinogen (serpin peptidase inhibitor, clade A, member 8)	Agt	2.13	0.007991
17218349	glutamate-ammonia ligase (glutamine synthetase); microRNA 8114	Glul	2.14	8.2e-05
17530930	sema domain, immunoglobulin domain (Ig), short basic domain, secreted, (semaphorin) 3B	Sema3b	2.14	0.01502
17380211	CCCTC-binding factor (zinc finger protein)-like, opposite strand; predicted gene, 40011	Ctcflos	2.14	0.015795
17254508	carbonic anhydrase 4	Car4	2.14	0.002448
17545087	chordin-like 1	Chrdl1	2.14	0.001249
17477116	electron transferring flavoprotein, beta polypeptide	Etfb	2.14	0.012447
17273253	myeloid-associated differentiation marker-like 2	Myadml2	2.14	0.000966
17366670	inter-alpha (globulin) inhibitor H5	Itih5	2.14	0.01076
17378799	predicted gene 20412 [Source:MGI Symbol;Acc:MGI:5141877]	Gm20412	2.14	0.00033
17464573	tissue factor pathway inhibitor 2	Tfpi2	2.14	0.010403
17479736	transmembrane 6 superfamily member 1	Tm6sf1	2.14	0.008514
17547505			2.14	0.009102
17548018			2.15	0.0018
17527353	electron transferring flavoprotein, alpha polypeptide	Etfa	2.15	0.005472
17381078	uridine-cytidine kinase 1-like 1, opposite strand	Uckl1os	2.15	0.004834
17469879	tissue inhibitor of metalloproteinase 4	Timp4	2.15	0.002278
17368387	predicted gene, 23969 [Source:MGI Symbol;Acc:MGI:5453746]	Gm23969	2.15	0.02263
17260261	calcium/calmodulin-dependent protein kinase II, beta	Camk2b	2.15	0.002138
17323299			2.15	0.001612
17353626	proline rich basic protein 1	Prob1	2.15	0.010637
17374053	hydroxyacyl-Coenzyme A dehydrogenase/3-ketoacyl-Coenzyme A thiolase/enoyl-Coenzyme A hydratase (trifunctional protein), beta subunit	Hadhb	2.15	0.013906
17549588			2.15	0.000734
17549860			2.15	0.000734
17439741	AF4/FMR2 family, member 1	Aff1	2.16	0.000377
17233104	blood vessel epicardial substance	Bves	2.17	0.002973
17319134	SRY (sex determining region Y)-box 10	Sox10	2.17	0.001203
17254153	schlafen 5	Slfn5	2.17	0.002937
17303964	dual specificity phosphatase 13	Dusp13	2.17	6.7e-05
17238605	integrin alpha 7	Itga7	2.17	0.01335
17521300	cytokine inducible SH2-containing protein	Cish	2.17	0.004263
17517112			2.17	0.048438
17277195	prostaglandin reductase 2	Ptgr2	2.17	0.000228
17502462	transmembrane protein 38A	Tmem38a	2.17	0.007529
17403237	guanylate binding protein 3	Gbp3	2.18	0.027388
17410275	epidermal growth factor	Egf	2.18	0.003569
17222193	ankyrin repeat domain 23	Ankrd23	2.18	0.000989
17274889	ganglioside-induced differentiation-associated-protein 10	Gdap10	2.18	0.027368
17371451	kelch-like 41	Klhl41	2.18	0.018051
17378898	adipogenin	Adig	2.19	0.012268
17461477	LIM and cysteine-rich domains 1	Lmcd1	2.19	0.000255
17403268	guanylate binding protein 2	Gbp2	2.19	0.006292
17521541	ubiquitin-like modifier activating enzyme 7	Uba7	2.19	0.011439
17238054	NADH dehydrogenase (ubiquinone) 1 alpha subcomplex, 4-like 2	Ndufa4l2	2.19	0.03611
17243102	junctional sarcoplasmic reticulum protein 1	Jsrp1	2.19	0.007583
17483242	myosin light chain, phosphorylatable, fast skeletal muscle	Mylpf	2.19	0.005669
17493005	fumarylacetoacetate hydrolase	Fah	2.2	0.004241
17411492	predicted gene 11783	Gm11783	2.2	0.003291
17384220	predicted gene 13403	Gm13403	2.2	0.003407
17220584	solute carrier family 30, member 10	Slc30a10	2.2	2e-06
17255987	titin-cap	Tcap	2.2	0.037175
17321434	desert hedgehog	Dhh	2.2	0.001158
17484419	kinase non-catalytic C-lobe domain (KIND) containing 1	Kndc1	2.21	0.00282
17489223	cytochrome c oxidase, subunit VIb polypeptide 1	Cox6b1	2.21	0.002769
17548102	predicted gene 10053 [Source:MGI Symbol;Acc:MGI:3704493]	Gm10053	2.21	0.005307
17548541	cytochrome c, somatic	Cycs	2.21	0.005307
17521875	solute carrier family 25 (mitochondrial carnitine/acylcarnitine translocase), member 20	Slc25a20	2.22	0.01468
17212982	aldehyde oxidase 1	Aox1	2.22	0.025845
17414729	orosomucoid 1	Orm1	2.22	0.02676
17494656	GTPase, very large interferon inducible 1; predicted gene 4070	Gvin1	2.22	0.002494
17506510	small nucleolar RNA, C/D box 68; ribosomal protein L13	Snord68	2.22	0.002416
17240109	Na+/K+ transporting ATPase interacting 2	Nkain2	2.22	0.01474
17287247	predicted gene, 24300 [Source:MGI Symbol;Acc:MGI:5454077]; predicted gene, 24017 [Source:MGI Symbol;Acc:MGI:5453794]; predicted gene, 23952 [Source:MGI Symbol;Acc:MGI:5453729]; uncharacterized LOC102643153	Gm24300	2.22	0.030512
17315743	oncostatin M receptor	Osmr	2.23	0.000236
17243034	MAP kinase-interacting serine/threonine kinase 2	Mknk2	2.23	0.000515
17219536	potassium inwardly-rectifying channel, subfamily J, member 10	Kcnj10	2.23	0.010922
17312396	cytochrome c-1	Cyc1	2.23	0.000346
17274184	predicted pseudogene 9847 [Source:MGI Symbol;Acc:MGI:3642840]	Gm9847	2.23	0.014702
17278688	microRNA 673	Mir673	2.24	0.022856
17364820	secreted frizzled-related sequence protein 5	Sfrp5	2.24	0.021663
17442185	predicted gene 6444	Gm6444	2.24	0.001504
17221553	polycystic kidney and hepatic disease 1	Pkhd1	2.24	0.005622
17255458	phosphatase, orphan 1; zinc finger protein 652	Phospho1	2.24	0.00302
17291694	serine (or cysteine) peptidase inhibitor, clade B, member 1a	Serpinb1a	2.24	0.007935
17322429	protein phosphatase 1, regulatory (inhibitor) subunit 1A	Ppp1r1a	2.24	0.003377
17451251	myosin XVIIIb	Myo18b	2.24	0.003909
17212750	signal transducer and activator of transcription 1	Stat1	2.25	0.001882
17283955	predicted gene, 26906 [Source:MGI Symbol;Acc:MGI:5477400]	Gm26906	2.25	0.018171
17413770	tropomodulin 1	Tmod1	2.25	0.014794
17457913	chloride channel, voltage-sensitive 1	Clcn1	2.25	0.01934
17500922	PDZ and LIM domain 3	Pdlim3	2.25	0.003993
17407829	ADAMTS-like 4	Adamtsl4	2.26	0.014711
17388663	predicted gene 10800 [Source:MGI Symbol;Acc:MGI:3641657]	Gm10800	2.26	0.025216
17535572	ATPase, Ca++ transporting, plasma membrane 3	Atp2b3	2.26	0.027609
17487927	lipase, hormone sensitive	Lipe	2.27	0.013714
17345797	apolipoprotein B mRNA editing enzyme, catalytic polypeptide 2	Apobec2	2.27	0.01131
17549502			2.27	0.000756
17549654			2.27	0.000756
17278803	microRNA 379	Mir379	2.28	0.002495
17387512	microRNA 130a	Mir130a	2.28	0.025486
17259534	solute carrier family 16 (monocarboxylic acid transporters), member 3	Slc16a3	2.28	0.000856
17275069	alkylglycerol monooxygenase	Agmo	2.28	0.001387
17523566	C-type lectin domain family 3, member b	Clec3b	2.28	0.003954
17280836	leucine-rich single-pass membrane protein 1	Lsmem1	2.28	0.009089
17539110	small muscle protein, X-linked	Smpx	2.28	0.021662
17410390	hydroxyacyl-Coenzyme A dehydrogenase	Hadh	2.29	0.001768
17236747	RIKEN cDNA 4732465J04 gene	4732465J04Rik	2.29	0.011165
17457143	aldo-keto reductase family 1, member B10 (aldose reductase)	Akr1b10	2.29	0.00312
17284170	RIKEN cDNA 2010107E04 gene	2010107E04Rik	2.29	0.003509
17364192	RIKEN cDNA 1500017E21 gene	1500017E21Rik	2.29	0.004685
17526861	dihydrolipoamide S-acetyltransferase (E2 component of pyruvate dehydrogenase complex)	Dlat	2.29	0.001206
17251527	period circadian clock 1	Per1	2.3	0.015724
17221817	collagen, type XIX, alpha 1	Col19a1	2.3	0.020937
17427961	carnitine palmitoyltransferase 2	Cpt2	2.3	0.006896
17357236	Berardinelli-Seip congenital lipodystrophy 2 homolog (seipin)	Bscl2	2.3	0.007262
17460826	Kruppel-like factor 15	Klf15	2.3	0.003514
17293547	fructose bisphosphatase 2	Fbp2	2.3	0.002198
17391834	sialic acid binding Ig-like lectin 1, sialoadhesin	Siglec1	2.3	0.005679
17321626	predicted gene 16537	Gm16537	2.31	0.006932
17256404	2,3-cyclic nucleotide 3 phosphodiesterase	Cnp	2.31	0.002122
17473248	tweety homolog 1 (Drosophila)	Ttyh1	2.31	7.6e-05
17447331	carboxypeptidase Z	Cpz	2.31	0.013798
17532540	FYVE and coiled-coil domain containing 1; predicted gene 17021	Fyco1	2.31	0.000419
17380762	microRNA 1a-1	Mir1a-1	2.32	0.007573
17268107	sarcoglycan, alpha (dystrophin-associated glycoprotein)	Sgca	2.32	0.020787
17478883	methylmalonyl CoA epimerase	Mcee	2.32	0.000199
17410022	myozenin 2	Myoz2	2.32	0.008098
17476639	predicted pseudogene 5327 [Source:MGI Symbol;Acc:MGI:3647424]	Gm5327	2.32	0.000565
17459676	retinol saturase (all trans retinol 13,14 reductase)	Retsat	2.33	0.000557
17212301	transmembrane protein 182	Tmem182	2.33	0.016658
17513995	actin, alpha 1, skeletal muscle	Acta1	2.33	0.004126
17247307	von Willebrand factor C domain containing 2	Vwc2	2.34	0.000487
17261865	cyclin G1	Ccng1	2.34	0.001295
17434023	ISG15 ubiquitin-like modifier	Isg15	2.35	0.009313
17302869	citrate lyase beta like	Clybl	2.35	0.002211
17457232	transmembrane protein 140	Tmem140	2.35	0.001437
17264792	ATPase, Na+/K+ transporting, beta 2 polypeptide	Atp1b2	2.35	0.000998
17392690	acyl-CoA synthetase short-chain family member 1	Acss1	2.36	0.006148
17443069	GATS protein-like 2	Gatsl2	2.36	0.002062
17493632	diacylglycerol O-acyltransferase 2	Dgat2	2.36	0.009025
17279349	adenylosuccinate synthetase like 1	Adssl1	2.36	0.011982
17214948	nuclear antigen Sp100	Sp100	2.37	0.013041
17344086	complement component 2 (within H-2S); predicted gene, 40706	C2	2.37	0.036863
17229607	Fc receptor, IgG, low affinity IIb	Fcgr2b	2.37	0.003068
17333347	superoxide dismutase 2, mitochondrial	Sod2	2.38	0.001082
17468018	hexokinase 2	Hk2	2.38	0.000455
17479628	alpha-kinase 3	Alpk3	2.38	0.005595
17248896	tripartite motif-containing 7	Trim7	2.38	0.006994
17460665	monoglyceride lipase	Mgll	2.38	0.000109
17476456	heat shock protein, alpha-crystallin-related, B6	Hspb6	2.38	0.000677
17504146	coenzyme Q9 homolog (yeast)	Coq9	2.39	7.9e-05
17278830	microRNA 495	Mir495	2.4	0.00612
17280590	protein kinase, cAMP dependent regulatory, type II beta	Prkar2b	2.4	0.011876
17350916	predicted gene 4951	Gm4951	2.4	0.015202
17506532	dipeptidase 1 (renal)	Dpep1	2.4	0.000743
17385099	nebulin	Neb	2.4	0.004987
17472192	matrix Gla protein	Mgp	2.4	0.003882
17397695	spermatogenesis and oogenesis specific basic helix-loop-helix 2	Sohlh2	2.41	0.003769
17290890	RIKEN cDNA A530099J19 gene	A530099J19Rik	2.41	0.004932
17366953	protein kinase C, theta	Prkcq	2.41	0.012342
17301055	C1q and tumor necrosis factor related protein 9	C1qtnf9	2.42	0.022462
17312236	GPI-anchored HDL-binding protein 1	Gpihbp1	2.42	0.021699
17291674	myosin light chain kinase family, member 4	Mylk4	2.42	0.011475
17501211			2.42	0.013496
17532647	mitochondrially encoded tRNA serine 1 [Source:MGI Symbol;Acc:MGI:102475]	mt-Ts1	2.43	0.015724
17230045	interferon activated gene 204	Ifi204	2.43	0.01317
17535644	plexin B3	Plxnb3	2.43	0.00014
17229020	flavin containing monooxygenase 1	Fmo1	2.43	0.004906
17306696	ER membrane protein complex subunit 9	Emc9	2.44	2.9e-05
17507605	growth arrest specific 6	Gas6	2.44	0.000606
17442128	purinergic receptor P2X, ligand-gated ion channel, 7	P2rx7	2.44	0.001671
17292139	mitochondrial calcium uniporter regulator 1	Mcur1	2.45	0.009817
17283516	ankyrin repeat and SOCS box-containing 2	Asb2	2.45	0.004226
17458813	aquaporin 1	Aqp1	2.45	0.000235
17406423	glycosyltransferase 28 domain containing 2; family with sequence similarity 160, member A1; ADP-ribosylation factor interacting protein 1	Glt28d2	2.45	0.001668
17418035	Cbp/p300-interacting transactivator, with Glu/Asp-rich carboxy-terminal domain, 4	Cited4	2.45	0.001611
17532264	xin actin-binding repeat containing 1	Xirp1	2.45	0.004129
17267418			2.46	0.008431
17494643	predicted gene 4070	Gm4070	2.46	0.001722
17271350	ATP-binding cassette, sub-family A (ABC1), member 8a	Abca8a	2.46	0.019313
17515402	calponin 1	Cnn1	2.46	0.0001
17517727	cytochrome c oxidase subunit Va	Cox5a	2.47	0.002182
17339876	glutaminyl-peptide cyclotransferase (glutaminyl cyclase)	Qpct	2.48	0.003247
17530653	aminolevulinic acid synthase 1	Alas1	2.48	0.006172
17312341	glutamate receptor, ionotropic, N-methyl D-aspartate-associated protein 1 (glutamate binding)	Grina	2.49	0.005157
17409753	amylo-1,6-glucosidase, 4-alpha-glucanotransferase	Agl	2.5	0.005144
17326567	glucan (1,4-alpha-), branching enzyme 1	Gbe1	2.51	0.005296
17315178	nuclear receptor subfamily 4, group A, member 1	Nr4a1	2.51	0.00071
17453454	elastin	Eln	2.51	0.000235
17216642	secretin receptor	Sctr	2.51	0.013104
17278690	microRNA 493	Mir493	2.52	0.014183
17232763	D-aspartate oxidase	Ddo	2.52	0.002504
17448735	SLAIN motif family, member 2	Slain2	2.52	0.00033
17318100	lymphocyte antigen 6 complex, locus C2	Ly6c2	2.52	0.000561
17279317	RIKEN cDNA A530016L24 gene	A530016L24Rik	2.52	0.003163
17448106	sel-1 suppressor of lin-12-like 3 (C. elegans)	Sel1l3	2.53	0.005656
17256579	contactin associated protein-like 1	Cntnap1	2.54	0.004336
17271984	solute carrier family 25 (mitochondrial thiamine pyrophosphate carrier), member 19	Slc25a19	2.54	0.025398
17464530			2.54	0.00015
17294397	leucine rich repeat containing 14B	Lrrc14b	2.55	0.004176
17346001	mitichondrial ribosomal protein S36, pseudogene 1	Mrps36-ps1	2.55	0.027739
17525288	transmembrane protein 45b	Tmem45b	2.55	0.000656
17549606			2.55	0.00666
17481087	stromal interaction molecule 1	Stim1	2.55	9.4e-05
17343882	EGF-like domain 8	Egfl8	2.55	0.000936
17327502	SH3-binding domain glutamic acid-rich protein	Sh3bgr	2.55	0.004184
17314577	phosphofructokinase, muscle	Pfkm	2.56	0.001406
17512809	haptoglobin	Hp	2.56	0.012474
17539560	ankyrin repeat and SOCS box-containing 11	Asb11	2.56	0.004236
17456545	leptin	Lep	2.57	0.004539
17481284	tripartite motif-containing 34B; tripartite motif-containing 34A	Trim34b	2.57	0.007068
17233930	catenin (cadherin associated protein), alpha 3	Ctnna3	2.57	0.002403
17400048	RAR-related orphan receptor gamma	Rorc	2.58	0.001364
17230087	interferon activated gene 203	Ifi203	2.58	0.005337
17218006	UDP-Gal:betaGlcNAc beta 1,3-galactosyltransferase, polypeptide 2	B3galt2	2.59	0.016521
17437385	superoxide dismutase 3, extracellular	Sod3	2.59	0.000537
17263535	sterol regulatory element binding transcription factor 1	Srebf1	2.59	0.001566
17246100	coenzyme Q10 homolog A (yeast)	Coq10a	2.6	0.000295
17419411	small nucleolar RNA, C/D box 99	Snord99	2.61	0.005967
17491362	MAS-related GPR, member B2	Mrgprb2	2.62	0.013726
17363429	aldehyde dehydrogenase family 1, subfamily A7	Aldh1a7	2.62	0.007753
17492417	peroxisomal biogenesis factor 11 alpha	Pex11a	2.63	0.007236
17350806	cortexin 3	Ctxn3	2.63	0.000703
17328368	myosin, heavy polypeptide 11, smooth muscle	Myh11	2.63	0.001517
17334253	enoyl-Coenzyme A delta isomerase 1	Eci1	2.63	0.00446
17342699	inositol hexaphosphate kinase 3	Ip6k3	2.63	0.000153
17278806	microRNA 411	Mir411	2.64	0.013405
17419902	myomesin family, member 3	Myom3	2.64	0.007393
17537962	proteolipid protein (myelin) 1	Plp1	2.64	0.009566
17272785	lectin, galactoside-binding, soluble, 3 binding protein	Lgals3bp	2.65	0.016036
17496354	sulfotransferase family 1A, phenol-preferring, member 1	Sult1a1	2.65	0.000208
17494664	very large inducible GTPase 1 pseudogene	Gm8989	2.65	0.003025
17248213	cytoplasmic polyadenylation element binding protein 4	Cpeb4	2.66	0.000487
17235597	ataxia, cerebellar, Cayman type homolog (human), opposite strand	Atcayos	2.66	0.005084
17287022	predicted gene, 24915 [Source:MGI Symbol;Acc:MGI:5454692]	Gm24915	2.66	0.005552
17434490	STEAP family member 4	Steap4	2.67	0.001809
17221436	somatomedin B and thrombospondin, type 1 domain containing	Sbspon	2.67	0.001092
17367963	ectonucleoside triphosphate diphosphohydrolase 2; neural proliferation, differentiation and control 1	Entpd2	2.67	0.004487
17510772	Hedgehog-interacting protein	Hhip	2.68	0.020639
17343710	histocompatibility 2, K1, K region; histocompatibility 2, D region locus 1	H2-K1	2.68	0.004694
17263223	obscurin, cytoskeletal calmodulin and titin-interacting RhoGEF	Obscn	2.68	0.001437
17448449	predicted gene 15949 [Source:MGI Symbol;Acc:MGI:3801730]	Gm15949	2.68	0.000701
17355264	melanocortin 2 receptor	Mc2r	2.69	0.001338
17337794	predicted gene, 25135 [Source:MGI Symbol;Acc:MGI:5454912]	Gm25135	2.7	0.000195
17282970	deiodinase, iodothyronine, type II	Dio2	2.7	0.006399
17330099	poly (ADP-ribose) polymerase family, member 14	Parp14	2.7	0.000823
17230078	myeloid cell nuclear differentiation antigen; interferon activated gene 204	Mnda	2.7	0.011972
17548228	CDGSH iron sulfur domain 3B; CDGSH iron sulfur domain 3	Cisd3b	2.7	0.011985
17287536	tetraspanin 17	Tspan17	2.7	0.001748
17337852	chloride intracellular channel 5	Clic5	2.7	0.00029
17547581			2.73	0.001723
17502951	uncharacterized LOC105246804	LOC105246804	2.73	0.009808
17487242	RIKEN cDNA A930016O22 gene	A930016O22Rik	2.74	0.00031
17282518	aldehyde dehydrogenase family 6, subfamily A1	Aldh6a1	2.74	0.001346
17272945	apoptosis-associated tyrosine kinase	Aatk	2.75	0.000215
17503942	metallothionein 1	Mt1	2.75	0.032187
17481776	adenosine monophosphate deaminase 3	Ampd3	2.75	0.002395
17284049	ankyrin repeat domain 9	Ankrd9	2.75	0.002084
17253258	coronin 6	Coro6	2.75	0.004983
17402165	predicted gene, 38684; RIKEN cDNA A530020G20 gene	Gm38684	2.75	0.035091
17477774	histidine rich calcium binding protein	Hrc	2.77	0.00703
17242839			2.78	0.019173
17477946	MEF2 activating motif and SAP domain containing transcriptional regulator	Mamstr	2.78	0.003484
17497421	BCL2/adenovirus E1B interacting protein 3	Bnip3	2.78	0.015599
17468183	actin, gamma 2, smooth muscle, enteric	Actg2	2.79	0.003906
17259078	ring finger protein 213	Rnf213	2.81	0.002349
17399460	pre B cell leukemia transcription factor interacting protein 1	Pbxip1	2.81	0.001604
17221502	junctophilin 1	Jph1	2.82	0.001727
17493807	pleckstrin homology domain containing, family B (evectins) member 1	Plekhb1	2.82	0.001374
17352693	microRNA 133a-1	Mir133a-1	2.83	0.025832
17389339	ryanodine receptor 3	Ryr3	2.83	0.005155
17352036	proline-serine-threonine phosphatase-interacting protein 2	Pstpip2	2.83	0.001757
17439622	1-acylglycerol-3-phosphate O-acyltransferase 9	Agpat9	2.85	0.004686
17265748	aspartoacylase	Aspa	2.85	0.001701
17214476	desmin	Des	2.85	0.00486
17392472	Ral GTPase activating protein, alpha subunit 2 (catalytic)	Ralgapa2	2.86	0.003404
17265096	solute carrier family 2 (facilitated glucose transporter), member 4	Slc2a4	2.86	0.000193
17547877	DEP domain containing MTOR-interacting protein	Deptor	2.87	0.001217
17313394	aconitase 2, mitochondrial	Aco2	2.87	0.000806
17520835	kyphoscoliosis peptidase	Ky	2.88	0.014394
17384457	stomatin	Stom	2.88	0.000189
17443185	MLX interacting protein-like	Mlxipl	2.88	0.008907
17510983			2.89	0.002521
17265129	acyl-Coenzyme A dehydrogenase, very long chain	Acadvl	2.89	0.002837
17339395	myomesin 1	Myom1	2.89	0.001394
17371296	xin actin-binding repeat containing 2	Xirp2	2.89	0.001053
17274875	nicotinamide phosphoribosyltransferase	Nampt	2.9	0.00463
17424105	aquaporin 7	Aqp7	2.9	0.003451
17513092	fatty acid 2-hydroxylase	Fa2h	2.9	0.00139
17268884	nuclear receptor subfamily 1, group D, member 1	Nr1d1	2.91	0.001295
17378348	transformation related protein 53 inducible nuclear protein 2	Trp53inp2	2.91	3.9e-05
17397331	predicted gene, 22043 [Source:MGI Symbol;Acc:MGI:5451820]	Gm22043	2.91	0.0059
17489420	FXYD domain-containing ion transport regulator 1	Fxyd1	2.91	0.002375
17406403	family with sequence similarity 160, member A1	Fam160a1	2.92	0.000596
17541528	immunoglobulin superfamily, member 1	Igsf1	2.92	0.001863
17298126	leucine-rich repeats and transmembrane domains 1	Lrtm1	2.93	0.00229
17550428			2.93	0.001971
17501204			2.93	0.00442
17324446	receptor transporter protein 4	Rtp4	2.95	0.007757
17518512	cartilage intermediate layer protein, nucleotide pyrophosphohydrolase	Cilp	2.95	0.011607
17391094	histidine decarboxylase	Hdc	2.96	0.003408
17320652	ATP-binding cassette, sub-family D (ALD), member 2	Abcd2	2.97	0.0035
17403070	alcohol dehydrogenase 1 (class I); predicted gene, 40156	Adh1	2.97	0.001744
17239919	laminin, alpha 2	Lama2	2.99	0.002382
17411147	interferon-induced protein 44	Ifi44	2.99	0.009425
17516469	ubiquitin specific peptidase 2	Usp2	3	0.003263
17361805	nuclear paraspeckle assembly transcript 1 (non-protein coding)	Neat1	3.01	0.001112
17357072	phospholipase A2, group XVI	Pla2g16	3.02	0.000638
17251091	myosin, heavy polypeptide 4, skeletal muscle	Myh4	3.02	0.027511
17536078	dystrophin, muscular dystrophy	Dmd	3.03	0.003236
17477670	Harvey rat sarcoma oncogene, subgroup R	Rras	3.03	0.000415
17453140	phosphorylase kinase gamma 1	Phkg1	3.05	0.000497
17278692	microRNA 337	Mir337	3.06	0.006292
17378359	acyl-CoA synthetase short-chain family member 2; predicted gene, 39969	Acss2	3.07	3e-05
17421074	heat shock protein family, member 7 (cardiovascular)	Hspb7	3.07	0.002079
17524117	hephaestin-like 1	Hephl1	3.09	0.000139
17449084	insulin-like growth factor binding protein 7	Igfbp7	3.1	0.00203
17532367	hedgehog acyltransferase-like	Hhatl	3.1	0.004226
17284839	integrin beta 8	Itgb8	3.11	0.001475
17252183	enolase 3, beta muscle	Eno3	3.11	0.005941
17492810	fibronectin type III and SPRY domain containing 2	Fsd2	3.12	0.004681
17342483	family with sequence similarity 195, member A	Fam195a	3.12	0.008222
17348626	RIKEN cDNA 8430422H06 gene	8430422H06Rik	3.13	0.006479
17304901	RIKEN cDNA 3425401B19 gene	3425401B19Rik	3.13	0.00913
17393131	syntrophin, acidic 1	Snta1	3.15	4.2e-05
17474143	solute carrier family 1 (neutral amino acid transporter), member 5	Slc1a5	3.17	0.006858
17233210	leukocyte immunoglobulin-like receptor, subfamily B, member 4B	Lilr4b	3.18	0.001799
17494651	very large inducible GTPase 1 pseudogene	Gm8979	3.19	0.003757
17253175	tumor suppressor candidate 5	Tusc5	3.19	0.023542
17514333	predicted gene 10719 [Source:MGI Symbol;Acc:MGI:3641690]	Gm10719	3.19	0.019628
17270848	sodium channel, voltage-gated, type IV, alpha	Scn4a	3.21	0.000771
17424243	expressed sequence AI464131	AI464131	3.21	0.003099
17403039	uncharacterized LOC102634333	LOC102634333	3.24	0.008147
17402039	leucine rich repeat containing 39	Lrrc39	3.25	0.003329
17260192	phosphoglycerate mutase 2	Pgam2	3.26	0.004281
17352175	myelin basic protein	Mbp	3.27	0.002133
17364484	sorbin and SH3 domain containing 1	Sorbs1	3.27	5.1e-05
17336681	tenascin XB	Tnxb	3.27	0.002688
17550426			3.29	0.000909
17448001	peroxisome proliferative activated receptor, gamma, coactivator 1 alpha	Ppargc1a	3.3	0.001636
17403224	guanylate binding protein 7	Gbp7	3.3	0.00338
17383633	carnitine acetyltransferase	Crat	3.3	0.000615
17257444	angiotensin I converting enzyme (peptidyl-dipeptidase A) 1	Ace	3.3	0.002135
17394267	troponin C2, fast	Tnnc2	3.31	0.005768
17467209	family with sequence similarity 13, member A	Fam13a	3.32	0.003454
17411323	acyl-Coenzyme A dehydrogenase, medium chain	Acadm	3.32	0.00094
17480729	uncoupling protein 3 (mitochondrial, proton carrier)	Ucp3	3.32	0.000414
17476728	CCAAT/enhancer binding protein (C/EBP), alpha	Cebpa	3.32	0.013368
17251133	myosin, heavy polypeptide 8, skeletal muscle, perinatal	Myh8	3.32	0.007689
17278834	microRNA 376c	Mir376c	3.34	0.005292
17415815	phosphoglucomutase 2	Pgm2	3.34	1.7e-05
17241553	myopalladin	Mypn	3.34	0.004132
17485246	troponin T3, skeletal, fast	Tnnt3	3.34	0.004521
17506042	cadherin 13	Cdh13	3.35	0.000949
17427746	protein kinase, AMP-activated, alpha 2 catalytic subunit	Prkaa2	3.41	0.005946
17285851	histone cluster 1, H2bc	Hist1h2bc	3.43	0.002716
17230067	myeloid nuclear differentiation antigen like	Mndal	3.43	0.007025
17489341	myelin-associated glycoprotein	Mag	3.45	0.0036
17231248	G0/G1 switch gene 2	G0s2	3.47	0.001188
17409261	synaptophysin-like 2	Sypl2	3.47	0.004697
17351811	acetyl-Coenzyme A acyltransferase 2 (mitochondrial 3-oxoacyl-Coenzyme A thiolase)	Acaa2	3.48	0.001195
17441037	2-5 oligoadenylate synthetase-like 2	Oasl2	3.49	0.018386
17305070	LIM domain binding 3	Ldb3	3.49	0.009048
17363559	family with sequence similarity 189, member A2	Fam189a2	3.51	0.000895
17414032	muscle-related coiled-coil protein	Murc	3.51	0.006793
17313677	patatin-like phospholipase domain containing 3	Pnpla3	3.51	0.001473
17281084	egl-9 family hypoxia-inducible factor 3	Egln3	3.54	0.00268
17282025	spectrin beta, erythrocytic	Sptb	3.54	0.001905
17393789	transglutaminase 2, C polypeptide	Tgm2	3.58	0.000168
17507573	ADP-ribosylhydrolase like 1	Adprhl1	3.58	0.001887
17386090	sodium channel, voltage-gated, type VII, alpha	Scn7a	3.6	0.000643
17496857	cytochrome c oxidase subunit VIa polypeptide 2	Cox6a2	3.6	0.006067
17223903	acyl-Coenzyme A dehydrogenase, long-chain	Acadl	3.62	0.001361
17243910	myosin binding protein C, slow-type	Mybpc1	3.62	0.00198
17422907	PPARGC1 and ESRR induced regulator, muscle 1	Perm1	3.62	0.000132
17489464	sodium channel, voltage-gated, type I, beta	Scn1b	3.63	0.001114
17268120	pyruvate dehydrogenase kinase, isoenzyme 2	Pdk2	3.64	0.000121
17550474			3.64	0.046871
17289132	RIKEN cDNA A630019I02 gene	A630019I02Rik	3.68	0.000458
17499485	myomesin 2	Myom2	3.7	0.002346
17456772	striatin interacting protein 2	Strip2	3.73	2.1e-05
17307837	epoxide hydrolase 2, cytoplasmic	Ephx2	3.74	0.009198
17401126	adenosine monophosphate deaminase 1	Ampd1	3.74	0.013583
17548750			3.76	0.002201
17451785	transmembrane protein 233	Tmem233	3.77	0.000506
17408211	phosphodiesterase 4D interacting protein (myomegalin); microRNA 7225	Pde4dip	3.79	0.000146
17503937	metallothionein 2	Mt2	3.83	0.022973
17517390	isocitrate dehydrogenase 3 (NAD+) alpha	Idh3a	3.84	0.000473
17358214	Kruppel-like factor 9	Klf9	3.84	0.0019
17233095	popeye domain containing 3	Popdc3	3.87	0.00333
17494662	GTPase, very large interferon inducible 1 pseudogene; predicted gene 4070	Gm18853	3.9	0.001363
17350267	myotilin	Myot	3.92	0.000634
17231349	protein phosphatase 1, regulatory (inhibitor) subunit 14c	Ppp1r14c	3.95	0.002353
17229891	ATPase, Na+/K+ transporting, alpha 2 polypeptide	Atp1a2	3.95	0.001331
17391332	myelin and lymphocyte protein, T cell differentiation protein	Mal	3.98	0.020998
17454209	gap junction protein, gamma 3	Gjc3	3.99	0.000999
17325324	stefin A2 like 1	Stfa2l1	4.01	0.007847
17463501	C-type lectin domain family 2, member d	Clec2d	4.01	2.8e-05
17452709	hydrocarboxylic acid receptor 1	Hcar1	4.04	0.004508
17543396	ectodysplasin A2 receptor	Eda2r	4.04	0.001494
17493685	predicted gene 4980	Gm4980	4.06	0.000872
17372255	predicted gene 13938 [Source:MGI Symbol;Acc:MGI:3651046]	Gm13938	4.07	0.004284
17310816	carboxymethylenebutenolidase-like (Pseudomonas)	Cmbl	4.07	0.001068
17377816	myosin, light polypeptide kinase 2, skeletal muscle	Mylk2	4.07	0.000548
17249980	interferon gamma induced GTPase	Igtp	4.1	0.00143
17407354	S100 calcium binding protein A1	S100a1	4.13	0.002615
17487374	apolipoprotein C-I	Apoc1	4.14	0.003502
17456428	leiomodin 2 (cardiac)	Lmod2	4.16	0.000954
17397320	La ribonucleoprotein domain family, member 1B	Larp1b	4.18	3.3e-05
17356216	pyruvate carboxylase	Pcx	4.18	0.001279
17348902	dystrobrevin alpha	Dtna	4.19	0.000157
17350925	interferon inducible GTPase 1	Iigp1	4.19	0.002076
17479259	ATP/GTP binding protein-like 1	Agbl1	4.22	0.000595
17306147	N-myc downstream regulated gene 2	Ndrg2	4.22	7e-05
17317278	kelch-like 38	Klhl38	4.23	0.002942
17485215	troponin I, skeletal, fast 2	Tnni2	4.25	0.006278
17526707	zinc finger and BTB domain containing 16	Zbtb16	4.29	0.000557
17249990	immunity-related GTPase family M member 2	Irgm2	4.32	0.003642
17506137	WAP four-disulfide core domain 1	Wfdc1	4.35	0.001126
17383104	1-acylglycerol-3-phosphate O-acyltransferase 2 (lysophosphatidic acid acyltransferase, beta)	Agpat2	4.37	0.001587
17410114	UDP galactosyltransferase 8A	Ugt8a	4.43	0.004924
17494649	GTPase, very large interferon inducible 1 pseudogene; predicted gene 4070	Gm17757	4.43	0.002424
17445715	CD36 antigen	Cd36	4.44	0.002144
17451816	heat shock protein 8	Hspb8	4.46	0.003311
17398139	myeloid leukemia factor 1	Mlf1	4.51	0.000766
17271143	calcium channel, voltage-dependent, gamma subunit 1	Cacng1	4.52	0.001167
17439131	starch binding domain 1	Stbd1	4.53	0.000169
17517360	sarcolipin	Sln	4.54	0.003856
17406421	family with sequence similarity 160, member A1; ADP-ribosylation factor interacting protein 1	Fam160a1	4.55	0.00139
17463670			4.61	0.00244
17278200	interferon, alpha-inducible protein 27	Ifi27	4.65	0.000432
17212286	solute carrier family 9 (sodium/hydrogen exchanger), member 2	Slc9a2	4.66	0.00048
17277766	thyroid stimulating hormone receptor	Tshr	4.7	0.002946
17283675	serine (or cysteine) peptidase inhibitor, clade A, member 3C	Serpina3c	4.73	0.001427
17530243	transferrin	Trf	4.75	0.003662
17545936	carbonic anhydrase 5b, mitochondrial	Car5b	4.88	0.001325
17440826	acetyl-Coenzyme A carboxylase beta	Acacb	4.92	0.001073
17253215	solute carrier family 6 (neurotransmitter transporter, serotonin), member 4	Slc6a4	4.93	0.000157
17496211	ATPase, Ca++ transporting, cardiac muscle, fast twitch 1	Atp2a1	4.94	0.001998
17251001	myosin, heavy polypeptide 2, skeletal muscle, adult	Myh2	4.98	0.002553
17280062	lipin 1	Lpin1	5	6.6e-05
17464943	protein phosphatase 1, regulatory (inhibitor) subunit 3A	Ppp1r3a	5.01	0.001051
17310637	family with sequence similarity 134, member B	Fam134b	5.03	0.000271
17276934	tetratricopeptide repeat domain 9	Ttc9	5.04	0.00052
17534646	Rho GTPase activating protein 36	Arhgap36	5.05	0.010624
17318950	colony stimulating factor 2 receptor, beta 2, low-affinity (granulocyte-macrophage)	Csf2rb2	5.08	0.000994
17229121	methyltransferase like 11B	Mettl11b	5.16	0.001648
17313862	peroxisome proliferator activated receptor alpha	Ppara	5.31	0.004493
17256870	CD300 antigen like family member G	Cd300lg	5.44	0.00086
17361362	actinin alpha 3	Actn3	5.46	0.000454
17439094	ADP-ribosyltransferase 3	Art3	5.49	4.9e-05
17509775			5.5	0.000505
17350921	RIKEN cDNA F830016B08 gene	F830016B08Rik	5.53	0.007605
17404077	peripheral myelin protein 2	Pmp2	5.55	0.001195
17356874	muscle glycogen phosphorylase	Pygm	5.65	0.002334
17385422	activin A receptor, type IC	Acvr1c	5.67	0.003963
17318083	lymphocyte antigen 6 complex, locus A	Ly6a	5.77	0.016281
17222825	nucleic acid binding protein 1	Nabp1	5.78	0.000201
17490245	myosin binding protein C, fast-type	Mybpc2	5.79	0.015584
17326987	melanocortin 2 receptor accessory protein	Mrap	5.88	0.002805
17400231	tropomodulin 4	Tmod4	5.89	0.000441
17365803	nebulin-related anchoring protein	Nrap	5.96	0.001098
17461942	peroxisome proliferator activated receptor gamma	Pparg	6.16	0.001955
17417898	claudin 19	Cldn19	6.26	0.001021
17376798	ankyrin repeat and EF-hand domain containing 1; cDNA sequence BC034902	Ankef1	6.43	0.003908
17534337	ATPase, (Na+)/K+ transporting, beta 4 polypeptide	Atp1b4	6.44	0.003315
17256697	amine oxidase, copper containing 3	Aoc3	6.58	0.001765
17501170	ankyrin repeat and SOCs box-containing 5	Asb5	6.6	0.000407
17230408	aarF domain containing kinase 3	Adck3	6.64	0.001356
17491354	MAS-related GPR, member B1	Mrgprb1	6.7	0.001503
17232453	triadin	Trdn	6.73	0.003051
17294959	cardiomyopathy associated 5	Cmya5	6.8	9.5e-05
17235018	complement factor D (adipsin)	Cfd	7.15	0.001178
17334666	tryptase beta 2	Tpsb2	7.22	0.004931
17229851	calsequestrin 1	Casq1	7.5	0.002029
17244732	myogenic factor 6	Myf6	7.54	0.003794
17543315	ankyrin repeat and SOCS box-containing 12	Asb12	7.58	3.9e-05
17211004	alcohol dehydrogenase, iron containing, 1	Adhfe1	7.65	0.00077
17420874	peptidyl arginine deiminase, type II	Padi2	7.69	8.5e-05
17497704	cytochrome c oxidase subunit VIIIb	Cox8b	7.82	0.000619
17500996	acyl-CoA synthetase long-chain family member 1	Acsl1	7.85	0.00118
17264330			7.9	0.000685
17477322	kallikrein 1-related petidase b26	Klk1b26	7.99	0.000269
17262942	solute carrier family 36 (proton/amino acid symporter), member 2	Slc36a2	8.34	0.001688
17346125	perilipin 4	Plin4	9.04	0.001072
17294816	creatine kinase, mitochondrial 2	Ckmt2	9.13	0.001164
17437765	klotho beta	Klb	9.2	0.001867
17501633	lipoprotein lipase	Lpl	9.27	7.9e-05
17474621	creatine kinase, muscle	Ckm	9.46	0.007596
17362342	lectin, galactose binding, soluble 12	Lgals12	9.5	0.003453
17464654	pyruvate dehydrogenase kinase, isoenzyme 4	Pdk4	9.53	0.001238
17492406	perilipin 1	Plin1	9.97	0.000599
17219222	myelin protein zero	Mpz	10.51	0.000261
17365098	stearoyl-Coenzyme A desaturase 1	Scd1	10.84	0.001022
17404091	fatty acid binding protein 4, adipocyte	Fabp4	11.29	0.002759
17380222	phosphoenolpyruvate carboxykinase 1, cytosolic	Pck1	11.48	0.001124
17303874	myozenin 1	Myoz1	12.12	0.003779
17474631			12.16	0.004595
17320499	choline kinase beta; carnitine palmitoyltransferase 1b, muscle; Chkb-Cpt1b readthrough transcript (NMD candidate)	Chkb	12.61	8.9e-05
17324404	adiponectin, C1Q and collagen domain containing	Adipoq	12.62	2.8e-05
17484909	patatin-like phospholipase domain containing 2	Pnpla2	13.21	0.000434
17476288	cytochrome c oxidase subunit VIIa 1	Cox7a1	15.09	0.000305
17498722	resistin	Retn	15.69	0.000224
17222707	methyltransferase like 21E	Mettl21e	17.28	5e-06
17469754	cell death-inducing DFFA-like effector c	Cidec	17.72	0.00023
17528947	muscular LMNA-interacting protein	Mlip	19.16	3.1e-05
17396152	carbonic anhydrase 3	Car3	23.45	3.8e-05
17234436	coiled-coil-helix-coiled-coil-helix domain containing 10	Chchd10	23.47	8e-05
17493432	thyroid hormone responsive	Thrsp	24.67	3.2e-05
17306960	mast cell protease 4	Mcpt4	26.91	0.001916
17351457	cell death-inducing DNA fragmentation factor, alpha subunit-like effector A	Cidea	30.16	0.000296
17346528	complement component 3	C3	31.63	0.00041
17314888	glycerol-3-phosphate dehydrogenase 1 (soluble)	Gpd1	36.12	2.9e-05
17404191			46.8	6e-06
17502899	uncoupling protein 1 (mitochondrial, proton carrier)	Ucp1	133.68	0.002494

## Sheet: E14.5 RYR+- vs WT
DEGs detected in RYR1+/- vs. WT at E14.5
Transcript Cluster ID	Description	Gene Symbol	Fold Change (linear) (hetRYR14.5 vs. wtRYR14.5)	ANOVA p-value (hetRYR14.5 vs. wtRYR14.5)
17353232	synaptotagmin IV	Syt4	-6.58	0.04615
17283117	potassium channel, subfamily K, member 10	Kcnk10	-2.23	0.029961
17248231	neuron specific gene family member 2	Nsg2	-2.06	0.041027
17218277	nicotinamide nucleotide adenylyltransferase 2	Nmnat2	-2	0.03787
17296427	ISL1 transcription factor, LIM/homeodomain	Isl1	-1.99	0.012437
17293045	sparc/osteonectin, cwcv and kazal-like domains proteoglycan 1	Spock1	-1.94	0.037331
17243839	achaete-scute complex homolog 1 (Drosophila)	Ascl1	-1.86	0.014019
17467068	neurogenic differentiation 6	Neurod6	-1.83	0.042333
17374618	dispatched homolog 2 (Drosophila); predicted gene, 38629	Disp2	-1.78	0.044591
17243717	synapsin III	Syn3	-1.75	0.036987
17255540	predicted gene 11538	Gm11538	-1.72	0.02
17392123	p21 protein (Cdc42/Rac)-activated kinase 7	Pak7	-1.72	0.036027
17235300	adenomatosis polyposis coli 2	Apc2	-1.7	0.034321
17275756	leucine rich repeat and fibronectin type III domain containing 5	Lrfn5	-1.7	0.033923
17395766	eukaryotic translation elongation factor 1 alpha 2	Eef1a2	-1.69	0.014588
17385816	potassium voltage-gated channel, subfamily H (eag-related), member 7	Kcnh7	-1.65	0.039721
17450283	mitogen-activated protein kinase 10	Mapk10	-1.63	0.020355
17411966	calbindin 1	Calb1	-1.62	0.035998
17493467	myosin VIIA	Myo7a	-1.61	0.025327
17543920	RIKEN cDNA 5330434G04 gene	5330434G04Rik	-1.59	0.035007
17214735	neuronal tyrosine-phophorylated phosphoinositide 3-kinase adaptor 2	Nyap2	-1.57	0.044782
17356924	neurexin II	Nrxn2	-1.57	0.027809
17349607	pleckstrin and Sec7 domain containing 2	Psd2	-1.54	0.049117
17253376	seizure related gene 6	Sez6	-1.52	0.02542
17296881	predicted gene 9602	Gm9602	-1.52	0.003676
17333686	limb expression 1 homolog (chicken)	Lix1	-1.51	0.046928
17516795	Down syndrome cell adhesion molecule like 1	Dscaml1	-1.51	0.021235
17278884	microRNA 541	Mir541	1.5	0.006518
17238854	spectrin repeat containing, nuclear envelope 1	Syne1	1.52	0.018248
17238856	spectrin repeat containing, nuclear envelope 1	Syne1	1.54	0.040502
17238866	spectrin repeat containing, nuclear envelope 1	Syne1	1.54	0.035151
17270303	proteasome (prosome, macropain) subunit, beta type 5, pseudogene	Psmb5-ps	1.61	0.038941
17366904	predicted gene, 24342 [Source:MGI Symbol;Acc:MGI:5454119]	Gm24342	1.65	0.04569
17550166			1.69	0.025058
17318875	predicted gene, 22107 [Source:MGI Symbol;Acc:MGI:5451884]	Gm22107	1.76	0.015217
17480566	nuclear encoded rRNA 5S 156 [Source:MGI Symbol;Acc:MGI:4422019]	n-R5s156	1.83	0.011402
17549150			3.93	0.000382
17549062			4.48	0.000605

## Sheet: E14.5 RYR-- vs WT
DEGs detected in RYR1-/- vs. WT at E14.5
Transcript Cluster ID	Description	Gene Symbol	Fold Change (linear) (homoRYR14.5 vs. wtRYR14.5)	ANOVA p-value (homoRYR14.5 vs. wtRYR14.5)
17301582	neurofilament, light polypeptide	Nefl	-12.38	0.026607
17308046	neurofilament, medium polypeptide	Nefm	-2.62	0.020647
17232417	RIKEN cDNA 9330159F19 gene	9330159F19Rik	-2.41	0.044227
17438749	amelotin	Amtn	-2.25	0.027156
17301489	stathmin-like 4	Stmn4	-2.23	0.046653
17248231	neuron specific gene family member 2	Nsg2	-2.14	0.039061
17278328	serine (or cysteine) peptidase inhibitor, clade A, member 3N	Serpina3n	-2.08	0.043829
17296427	ISL1 transcription factor, LIM/homeodomain	Isl1	-2.07	0.018496
17437876	ubiquitin carboxy-terminal hydrolase L1	Uchl1	-2.07	0.024059
17283117	potassium channel, subfamily K, member 10	Kcnk10	-2.01	0.036298
17450283	mitogen-activated protein kinase 10	Mapk10	-1.89	0.008612
17323198	EF hand calcium binding domain 1	Efcab1	-1.86	0.048747
17243839	achaete-scute complex homolog 1 (Drosophila)	Ascl1	-1.85	0.013973
17354101	dihydropyrimidinase-like 3	Dpysl3	-1.8	0.008494
17448577	gamma-aminobutyric acid (GABA) A receptor, subunit alpha 2	Gabra2	-1.8	0.046143
17293045	sparc/osteonectin, cwcv and kazal-like domains proteoglycan 1	Spock1	-1.76	0.049908
17412391			-1.73	0.00443
17243717	synapsin III	Syn3	-1.71	0.032182
17406831	synaptotagmin XI	Syt11	-1.7	0.045849
17255540	predicted gene 11538	Gm11538	-1.68	0.020794
17416540	low density lipoprotein receptor-related protein 8, apolipoprotein e receptor	Lrp8	-1.68	0.048504
17543920	RIKEN cDNA 5330434G04 gene	5330434G04Rik	-1.66	0.029305
17255258	predicted gene, 22456 [Source:MGI Symbol;Acc:MGI:5452233]	Gm22456	-1.64	0.042348
17268786	neurogenic differentiation 2	Neurod2	-1.63	0.047972
17307736			-1.58	0.007695
17378450	matrix metallopeptidase 24	Mmp24	-1.58	0.034648
17315087	sodium channel, voltage-gated, type VIII, alpha	Scn8a	-1.56	0.046016
17400521	synaptic vesicle glycoprotein 2 a	Sv2a	-1.54	0.046357
17403745	solute carrier family 44, member 5	Slc44a5	-1.53	0.031843
17406962	tripartite motif-containing 46	Trim46	-1.51	0.04145
17295482	microtubule-associated protein 1B	Map1b	-1.5	0.033883
17458677	cAMP responsive element binding protein 5	Creb5	-1.5	0.001679
17237180	predicted gene, 23105 [Source:MGI Symbol;Acc:MGI:5452882]	Gm23105	1.51	0.012914
17379938	CCAAT/enhancer binding protein (C/EBP), beta	Cebpb	1.51	0.003455
17535296	nuclear encoded rRNA 5S 8 [Source:MGI Symbol;Acc:MGI:4421742]	n-R5s8	1.51	0.043713
17406452	U73B small nuclear RNA	Rnu73b	1.52	0.02149
17410031	synaptopodin 2	Synpo2	1.56	0.005314
17441949			1.58	0.009548
17430833	small nucleolar RNA, H/ACA box 73a	Snora73a	1.59	0.02637
17249829			1.61	0.022939
17537343	predicted gene, 24438 [Source:MGI Symbol;Acc:MGI:5454215]	Gm24438	1.63	0.042602
17496408	aldolase A, fructose-bisphosphate	Aldoa	1.64	0.033626
17357148	small nucleolar RNA, C/D box 22	Snord22	1.64	0.049851
17462057	predicted pseudogene 8203	Gm8203	1.65	0.027475
17541719	microRNA 450-2	Mir450-2	1.65	0.03185
17430831	small nucleolar RNA, H/ACA box 73b	Snora73b	1.66	0.011608
17234423	Der1-like domain family, member 3	Derl3	1.67	0.000768
17325576	predicted gene, 25617 [Source:MGI Symbol;Acc:MGI:5455394]	Gm25617	1.68	0.016929
17424631	RNA component of mitochondrial RNAase P	Rmrp	1.68	0.033222
17520288	predicted gene, 22866 [Source:MGI Symbol;Acc:MGI:5452643]	Gm22866	1.73	0.023281
17407706	predicted gene, 24920 [Source:MGI Symbol;Acc:MGI:5454697]	Gm24920	1.74	0.001698
17545225	predicted gene, 25107 [Source:MGI Symbol;Acc:MGI:5454884]	Gm25107	1.97	0.035566
17305986	ribonuclease P RNA component H1	Rpph1	2.06	0.01039
17321241	small nucleolar RNA, H/ACA box 34; microRNA 1291	Snora34	2.06	0.036214
17459095	nuclear encoded rRNA 5S 162 [Source:MGI Symbol;Acc:MGI:4422026]	n-R5s162	2.24	0.035357
17324959	nuclear encoded rRNA 5S 33 [Source:MGI Symbol;Acc:MGI:4421878]	n-R5s33	2.48	0.007005
17316775	actin-binding Rho activating protein	Abra	2.63	0.038329
17474128	nuclear encoded rRNA 5S 151 [Source:MGI Symbol;Acc:MGI:4422013]	n-R5s151	2.84	0.019004
17513978	predicted gene, 24089 [Source:MGI Symbol;Acc:MGI:5453866]; predicted gene, 23647 [Source:MGI Symbol;Acc:MGI:5453424]	Gm24089	2.91	0.0233
17513980	predicted gene, 24089 [Source:MGI Symbol;Acc:MGI:5453866]; predicted gene, 23647 [Source:MGI Symbol;Acc:MGI:5453424]	Gm24089	2.91	0.0233
17513976	nuclear encoded rRNA 5S 136	n-R5s136	3.52	0.007379
17549062			6.85	3.5e-05
17549150			7.07	7e-06

## Sheet: E14.5 Cav1.1+- vs WT
DEGs detected in Cav1.1+/- vs. WT at E14.5
Transcript Cluster ID	Description	Gene Symbol	Fold Change (linear) (hetCAC14.5 vs. wtCAC14.5)	ANOVA p-value (hetCAC14.5 vs. wtCAC14.5)
17376276	small nucleolar RNA, C/D box 57; NOP56 ribonucleoprotein	Snord57	-1.79	0.036984
17255458	phosphatase, orphan 1; zinc finger protein 652	Phospho1	-1.69	0.049581
17458110	RNA, Y3 small cytoplasmic (associated with Ro protein)	Rny3	-1.65	0.014394
17431799	predicted gene, 22961 [Source:MGI Symbol;Acc:MGI:5452738]	Gm22961	-1.57	0.048653
17408015	histone cluster 2, H3c2	Hist2h3c2	-1.5	0.0031
17462872	complement component 1, r subcomponent A	C1ra	1.55	0.046612
17493119	predicted gene, 23192 [Source:MGI Symbol;Acc:MGI:5452969]; predicted gene 20480 [Source:MGI Symbol;Acc:MGI:5141945]	Gm23192	1.55	0.040538
17530540	collagen, type VI, alpha 5	Col6a5	1.63	0.031717

## Sheet: E14.5 Cav1.1-- vs WT
DEGs detected in Cav1.1-/- vs. WT at E14.5
Transcript Cluster ID	Description	Gene Symbol	Fold Change (linear) (homoCAC14.5 vs. wtCAC14.5)	ANOVA p-value (homoCAC14.5 vs. wtCAC14.5)
17365803	nebulin-related anchoring protein	Nrap	-3.23	0.01557
17326887	Map3k7 C-terminal like	Map3k7cl	-3.23	0.008246
17364176	ankyrin repeat domain 1 (cardiac muscle)	Ankrd1	-2.92	0.004547
17329056	RIKEN cDNA A930003A15 gene	A930003A15Rik	-2.63	0.009007
17426365	tenascin C	Tnc	-2.54	0.029673
17507573	ADP-ribosylhydrolase like 1	Adprhl1	-2.52	0.014175
17515402	calponin 1	Cnn1	-2.28	0.003237
17456428	leiomodin 2 (cardiac)	Lmod2	-2.25	0.012709
17294934	thrombospondin 4	Thbs4	-2.25	1.4e-05
17361362	actinin alpha 3	Actn3	-2.08	3.2e-05
17463332	fibroblast growth factor 6	Fgf6	-2.08	0.005725
17491368	cysteine and glycine-rich protein 3	Csrp3	-2.07	0.028221
17439131	starch binding domain 1	Stbd1	-2.06	0.020885
17516332	sodium channel, voltage-gated, type III, beta	Scn3b	-2.06	0.029329
17295125	coagulation factor II (thrombin) receptor-like 1	F2rl1	-2.04	0.005286
17327502	SH3-binding domain glutamic acid-rich protein	Sh3bgr	-1.98	0.028463
17373680	peptidase domain containing associated with muscle regeneration 1; predicted gene, 39891	Pamr1	-1.98	0.034302
17515703	a disintegrin-like and metallopeptidase (reprolysin type) with thrombospondin type 1 motif, 8	Adamts8	-1.98	0.013882
17518512	cartilage intermediate layer protein, nucleotide pyrophosphohydrolase	Cilp	-1.98	0.033924
17461477	LIM and cysteine-rich domains 1	Lmcd1	-1.96	0.007024
17499485	myomesin 2	Myom2	-1.92	0.031354
17339395	myomesin 1	Myom1	-1.9	0.025289
17479259	ATP/GTP binding protein-like 1	Agbl1	-1.9	0.026608
17537883	transcription elongation factor A (SII)-like 7	Tceal7	-1.89	0.020454
17534960	four and a half LIM domains 1	Fhl1	-1.84	0.023779
17443523	acetylcholinesterase	Ache	-1.77	0.032667
17350267	myotilin	Myot	-1.76	0.037671
17398139	myeloid leukemia factor 1	Mlf1	-1.76	0.023809
17500922	PDZ and LIM domain 3	Pdlim3	-1.76	0.024889
17352036	proline-serine-threonine phosphatase-interacting protein 2	Pstpip2	-1.74	0.044245
17364192	RIKEN cDNA 1500017E21 gene	1500017E21Rik	-1.73	0.026174
17544870	ripply1 homolog (zebrafish)	Ripply1	-1.73	0.039036
17481863	microtubule associated monooxygenase, calponin and LIM domain containing 2	Mical2	-1.71	0.013424
17527453	outer dense fiber of sperm tails 3-like 1	Odf3l1	-1.69	0.017493
17403745	solute carrier family 44, member 5	Slc44a5	-1.68	0.008722
17306577	myosin, heavy polypeptide 7, cardiac muscle, beta	Myh7	-1.67	0.039207
17528863	tropomodulin 2	Tmod2	-1.66	0.008353
17233930	catenin (cadherin associated protein), alpha 3	Ctnna3	-1.63	0.017246
17326394	filamin A interacting protein 1-like	Filip1l	-1.63	0.000528
17522439	myosin, light polypeptide 3	Myl3	-1.63	0.030522
17334538	pentraxin 4	Ptx4	-1.62	0.029466
17364597	tolloid-like 2	Tll2	-1.61	0.019267
17380762	microRNA 1a-1	Mir1a-1	-1.61	0.027607
17399347	thrombospondin 3	Thbs3	-1.61	0.013748
17448535	Yip1 domain family, member 7	Yipf7	-1.61	0.030168
17275090	diacylglycerol kinase, beta	Dgkb	-1.6	0.01081
17241181	a disintegrin-like and metallopeptidase (reprolysin type) with thrombospondin type 1 motif, 14	Adamts14	-1.57	0.049262
17529417	synaptosomal-associated protein 91	Snap91	-1.57	0.033209
17285546	secreted frizzled-related protein 4	Sfrp4	-1.56	0.006988
17498323	tumor necrosis factor receptor superfamily, member 23	Tnfrsf23	-1.56	0.048984
17315891	interleukin 7 receptor	Il7r	-1.55	0.022868
17350040	Rho GTPase activating protein 26	Arhgap26	-1.55	0.007808
17443535	UFM1-specific peptidase 1	Ufsp1	-1.55	0.010214
17502001	jun D proto-oncogene	Jund	-1.55	0.015767
17378395	myosin, heavy chain 7B, cardiac muscle, beta	Myh7b	-1.54	0.002888
17248847	hepatitis A virus cellular receptor 1	Havcr1	-1.53	0.049772
17287160	asporin	Aspn	-1.52	0.046086
17347801	prolyl endopeptidase-like	Prepl	-1.52	0.034712
17364474	PDZ and LIM domain 1 (elfin)	Pdlim1	-1.52	0.043789
17224071	fibronectin 1	Fn1	-1.51	0.009912
17255614	homeobox B2	Hoxb2	-1.51	0.01335
17353699	heparin-binding EGF-like growth factor	Hbegf	-1.51	0.019388
17366928	microRNA 669o	Mir669o	-1.51	0.000262
17495373	pleckstrin homology domain containing, family A member 7	Plekha7	-1.51	0.039261
17499962	plasminogen activator, tissue	Plat	-1.51	0.019091
17281684	predicted gene, 23579 [Source:MGI Symbol;Acc:MGI:5453356]	Gm23579	-1.5	0.0235
17380915	collagen, type XX, alpha 1; RIKEN cDNA 9230112E08 gene	Col20a1	1.5	0.035724
17494783	predicted gene, 25424 [Source:MGI Symbol;Acc:MGI:5455201]	Gm25424	1.5	0.030858
17326700	microRNA 99a	Mir99a	1.51	0.009029
17301414	scavenger receptor class A, member 5 (putative)	Scara5	1.52	0.031759
17544358	predicted gene, 26029 [Source:MGI Symbol;Acc:MGI:5455806]	Gm26029	1.52	0.000775
17288309	zinc finger protein 455	Zfp455	1.53	0.001593
17398321	predicted gene, 24544 [Source:MGI Symbol;Acc:MGI:5454321]	Gm24544	1.53	0.036827
17434813	sema domain, immunoglobulin domain (Ig), short basic domain, secreted, (semaphorin) 3E	Sema3e	1.54	0.019929
17234423	Der1-like domain family, member 3	Derl3	1.55	0.009649
17316402	NIPA-like domain containing 2	Nipal2	1.55	0.00771
17418934	transmembrane protein 54	Tmem54	1.55	0.010799
17221269	carboxypeptidase A6	Cpa6	1.56	0.046356
17358165	transient receptor potential cation channel, subfamily M, member 3	Trpm3	1.56	0.005832
17519649	glutathione S-transferase, alpha 4	Gsta4	1.56	0.035126
17350332	potassium intermediate/small conductance calcium-activated channel, subfamily N, member 2	Kcnn2	1.57	0.015082
17459786	leucine rich repeat transmembrane neuronal 4	Lrrtm4	1.57	0.01499
17306532	myosin, heavy polypeptide 6, cardiac muscle, alpha	Myh6	1.58	0.047575
17535274	RIKEN cDNA 1110012L19 gene	1110012L19Rik	1.59	1.5e-05
17388353	glycosyltransferase-like 1B	Gyltl1b	1.6	0.001003
17366728	microRNA 669d	Mir669d	1.61	0.011642
17385838	predicted gene, 23503 [Source:MGI Symbol;Acc:MGI:5453280]	Gm23503	1.64	0.03886
17512121	cadherin 8	Cdh8	1.65	0.001047
17353267	G protein-coupled receptor 17	Gpr17	1.66	0.000762
17215932	sushi, nidogen and EGF-like domains 1	Sned1	1.68	0.030037
17233384	fatty acid binding protein 7, brain	Fabp7	1.71	0.002275
17526456	CD3 antigen, gamma polypeptide	Cd3g	1.73	0.002225
17240693	glutamate receptor, ionotropic, kainate 2 (beta 2)	Grik2	1.76	0.002077
17329759	apolipoprotein D	Apod	1.81	0.009941
17320614	kinesin family member 21A	Kif21a	1.94	0.00956
17217035	cathepsin E	Ctse	2.08	0.000765
17288442	Iroquois related homeobox 2 (Drosophila)	Irx2	2.53	0.042667

## Sheet: E18.5 RYR+- vs WT
DEGs detected in RYR1+/- vs. WT at E18.5
Transcript Cluster ID	Description	Gene Symbol	Fold Change (linear) (hetRYR18.5 vs. wtRYR18.5)	ANOVA p-value (hetRYR18.5 vs. wtRYR18.5)
17322039	keratin 1	Krt1	-2.25	0.017629
17350009	predicted gene, 24690 [Source:MGI Symbol;Acc:MGI:5454467]	Gm24690	-1.81	0.004248
17399402			-1.79	0.001297
17233769	argininosuccinate synthase pseudogene; argininosuccinate synthetase 1	Gm5424	-1.78	0.004254
17311457	predicted gene, 23530 [Source:MGI Symbol;Acc:MGI:5453307]	Gm23530	-1.78	0.032357
17302360	predicted gene, 26139 [Source:MGI Symbol;Acc:MGI:5455916]	Gm26139	-1.68	0.021363
17415349	predicted gene 13287	Gm13287	-1.68	0.004306
17278626	microRNA 345	Mir345	-1.56	0.000566
17529679	zinc finger protein of the cerebellum 1	Zic1	-1.53	0.010398
17477362	kallikrein 1-related peptidase b24	Klk1b24	-1.52	0.029802
17491318	MAS-related GPR, member A1	Mrgpra1	-1.51	0.014584
17476535	dermokine	Dmkn	-1.5	0.016871
17421663	predicted gene, 23318 [Source:MGI Symbol;Acc:MGI:5453095]	Gm23318	1.56	0.029754
17265129	acyl-Coenzyme A dehydrogenase, very long chain	Acadvl	1.59	0.047173
17419405	small nucleolar RNA, H/ACA box 16A	Snora16a	1.59	0.043365
17326075	resistin like gamma	Retnlg	1.61	0.014719
17232731	U3A small nuclear RNA	Rnu3a	1.61	0.014513
17283463	inositol 1,3,4-triphosphate 5/6 kinase	Itpk1	1.64	0.009949
17486543	vomeronasal 2, receptor 54	Vmn2r54	1.73	0.024118
17548266	mitochondrial ribosomal protein L47	Mrpl47	1.89	0.006591
17549062			3.03	0.000648
17549150			3.44	0.001548
17502899	uncoupling protein 1 (mitochondrial, proton carrier)	Ucp1	48.58	0.026243

[truncated: 3 more sheets: E18.5 RYR-- vs WT, E18.5 Cav1.1+- vs WT, E18.5 Cav1.1-- vs WT]
