# Supplementary material for: Distinct transcriptomic changes in E14.5 mouse skeletal muscle lacking RYR1 or Cav1.1 converge at E18.5
Source: PLoS One. 2018 Mar 15;13(3):e0194428. doi: 10.1371/journal.pone.0194428 (PMC5854361; doi:10.1371/journal.pone.0194428)
Supplement: S8 Table — (XLSX) [file pone.0194428.s011.xlsx]

## Sheet: Sheet1
Cav1.1-/- vs WT E18.5 GO BP: Acylglycerol Metabolic Process (GO:0006639)
Transcript Cluster ID	Description	Gene Symbol	Fold Change (linear) (homoCAC18.5 vs. wtCAC18.5)	ANOVA p-value (homoCAC18.5 vs. wtCAC18.5)
17336681	tenascin XB	Tnxb	-2.32	0.002847
17359160	phospholipase C, epsilon 1	Plce1	-1.77	0.002261
17461489	caveolin 3	Cav3	-1.7	0.027491
17269521	ATP citrate lyase	Acly	1.52	0.004562
17318502	diacylglycerol O-acyltransferase 1	Dgat1	1.73	0.044215
17404091	fatty acid binding protein 4, adipocyte	Fabp4	1.74	0.019655
17493632	diacylglycerol O-acyltransferase 2	Dgat2	1.82	0.00804
17328829	solute carrier family 25 (mitochondrial carrier, citrate transporter), member 1	Slc25a1	1.84	0.016697
17523416	abhydrolase domain containing 5	Abhd5	1.87	0.015557
17254395	acetyl-Coenzyme A carboxylase alpha	Acaca	1.91	0.001187
17280062	lipin 1	Lpin1	1.92	0.037814
17314888	glycerol-3-phosphate dehydrogenase 1 (soluble)	Gpd1	2.05	0.013874
17487381	apolipoprotein E	Apoe	2.17	0.016576
17501633	lipoprotein lipase	Lpl	2.33	0.017426
17273348	fatty acid synthase	Fasn	2.34	0.004823
17313677	patatin-like phospholipase domain containing 3	Pnpla3	2.53	0.040966
17500996	acyl-CoA synthetase long-chain family member 1	Acsl1	2.72	0.033398
17383104	1-acylglycerol-3-phosphate O-acyltransferase 2 (lysophosphatidic acid acyltransferase, beta)	Agpat2	3.8	0.005936
17487374	apolipoprotein C-I	Apoc1	3.93	0.009152
17492406	perilipin 1	Plin1	4.02	0.02704
